# Supplementary material for: Identification of evolutionarily conserved non-AUG-initiated N-terminal extensions in human coding sequences
Source: PubMed Central journal article supplement — Nucleic Acids Res. 2011 Jan 25;39(10):4220–34. doi: 10.1093/nar/gkr007 (PMC3105428; doi:10.1093/nar/gkr007), 2011-01-25
Supplement: supp_gkr007_Supplementary_Dataset_1.pdf [file supp_gkr007_Supplementary_Dataset_1.pdf]

## Supplementary Dataset 1

Nucleotide and amino acid sequences of human genes of candidate or known non-AUG initiated N-terminal extensions. A) The new 42 candidates identified in this study listed in the same order as in table 1A of the main text. B) The 17 known cases that passed our qualitative test for conservation of the extension listed in the same order as in table 1B of the main text. C) The 12 known cases that did not pass our qualitative test for conservation of the extension listed in no particular order. Candidate initiation codons are highlighted in green. Out-of-frame AUG codons between the upstream proposed non-AUG initiators and the next in-frame AUG are highlighted in light brown. Upstream in-frame stop codons are highlighted in magenta. The stop codons of the main open reading are highlighted in red. In each case the nucleotide sequence is shown on top and the predicted translated amino acid sequence on bottom. Below that the predicted molecular masses of the protein initiated by the first in-frame AUG and the upstream non-AUG codon are shown. The non-AUG initiated extension is highlighted in light blue. The main open reading frame initiated by AUG is highlighted in yellow. Nucleotides in positions -3 and +4 relative to the first nucleotide of proposed initiation sites and matching the preferred (Kozak) consensus context are highlighted in gray. Comments on the extent of conservation of the non-AUG initiation and or the conservation of the coding potential of the extension are highlighted in magenta. The GenBank accession number, the name of the gene and common gene synonyms are indicated.

# A)

#1

**NM\_001042589**

Initiated by AUG codon(s) in non-mammals. No EST in mammals has upstream AUG.  
Likely initiated by a cluster of CUGs/UUG

**TMEM8B transmembrane protein 8B**

Synonyms: NGX6; NAG-5; C9orf127; MGC120460; RP11-112J3.10; TMEM8B

CGACGTCAAGTCGAGGCCGCCCGCGGGCCTGGTTATCGCCGGTTCAGCGCAGCCCGGAGTCGCCAGG  
CCTGAACTCCTACCCAGCCTAGACTCAAGTCTGGGTTTCAGCTGCCGCCAGCCCTATTGCTGCTGTTGCTG  
TTCTCTGTCCTTGGCCCAGGGGCTGGAGGCCTTTTCTGACTGATTACTCCACCTGCTCACCCGCAAGCT  
GAGTCCTTTCCGCTCCTTTGCCAGCACCAGACTCCTTCCACTTCCATGTTTCTGAGGACACATTCTGGCTG  
TTTGAACCTCATCATCTTCAAGGAGCAAGGGGGAACTTTGGGGACCACTGCCAGACCAAAGTGTGACT  
GTGTATTTCCGGTCCGGGGCACCCCTGTCAATCCCCTGCATACACACTTCCCAGGGGACACAGCTGT  
GCCTGGGGTTTTCTCACTGACCCTCAGCTGGACACTGCCAACCACCTCAGGCATCTTTAACGTGAGCA  
GCCCTTACCTGGGGACTGGTTCTTGGCTGCCACCTTCCCAGGCCACAGCCACATCTCTGTCAAGGGT  
CTCCAGGATGAGTGTGAGTACCTCCTTCCAGCCGAGCTGATTGTCCGGCGTTTGTGAGCGTCTGTGCT  
GGTTCTGGCCGGCCCTCAGAGCAAACCCTCTCCACACAATCGCTCAGCCCTGTACAAGGTCTTTGTGC  
CCAGCTTCACTTACAGGGTTTTCAGCACAGCTGGTGTGTGGGGGGCCGTGGGGTATCTGCCTGCCCCCTG  
TCACTGCGTCTGCGTCCCAAAGCCCCACCCCTGCACAACCTCAAGCTCTGTGGCCTGTGGAGGTGCCTCAGG  
ATGCCAGCTGGAGCTGGCACTGCCCCCTGGGGGCACTGGGTCTACGTGCGTGTGGAAACATCATCCCGG

GCCCTGGTAGGACCATCCGCTTCCAGCTGTGTGTGCGGTTGCAAGAGTGCCACAGCCCAGCCCTGCTCCGA  
GCCCTGGTCCCTGGAGCTGCCATGAACATGCCCCAGTCCCTGGGCAACCAGCCACTGCCCCAGAACCGCC  
ATCCCTTGGAAACCCCTGCGGAGGGGCTGGGACCACGTCCCCACCCGAGCACTGCTGGCCAGTGCAGCCGCA  
CTCTGCGCAACGAGCTGGACACCTTCTCTGTCCACTTCTACATCTTCTTTGGCCCAAGTGTGGCCCTTCCC  
CCTGAGCGCCCAGCCGTGTTTCGCCATGAGGCTGTTGCCAGTGTGGACAGTGGAGGCGTCTCAGCCTGGA  
GCTCCAGCTCAATGCGAGCTCCGTGCGCCAGGAAAACGTGACGGTGTGGATGCTTGACTCACGAGGTGC  
CCTTGAGCCTGGGGGATGCAGCAGTACCTGTTCCAAAGAGTCCCTGGCCGGCTTCTCCTCTCTGTCACT  
GCCACCACCAGGGTTGCCAGGCTGCGAATCCCATTTCCCGCAGACGGGGACCTGGTTTCTGGCCCTCCGCTC  
CCTGTGCGGGGTGGGGCCTCGGTTTCGTGCGGTGCCGCAACGCGACGGCCGAGGTGCGGATGCGCACCTTCC  
TGTCCCCATGCGTGGACGACTGCGGGCCCTACGGCCAGTGAAGCTGTGCGCACACACAATTATCTGTAC  
GCAGCTGCGAGTGCACAGGCCGGGTGGAGAGCTGGGCTGGGCTGCACCGACAGTGCAGATGCGCTCACCTATGG  
ATTTCCAGTGTCTCCACACTCCTGCTCTGAGCCTGAGCAACCTCATGTTTCTGCCACCTGTGGTCTGGCCA  
TTCGGAGTCGATATGTGCTGGAAGCTGCAGTCTACACCTTACCATGTTCTTCTCCACGTTCTATCATGCC  
TGTGACCAGCCAGGCATCGTGGTTTTCTGCATCATGGACTACGATGTGCTGCAGTTCTGTGATTTCTGGG  
CTCCTTAATGTCCGTGTGGGTCACTGTCAATTGCCATGGCTCGTTTTACAGCCCGTGGTCAAGCAGGTGCTGT  
ATTTGCTGGGAGCTATGCTGCTGTCCATGGCTCTGCAGCTTGACCGACATGGACTCTGGAACCTGCTTGGGA  
CCCAGTCTCTTCGCCCTGGGGATCTTGGCCACAGCCTGGACAGTACGCAGCGTCCGCCGCCGGCACTGCTA  
CCCACCCACGTGGCGCCGCTGGCTTTTTCTACTTGTGCCCTGGCAGCCTTATTGCAGGCAGTGGCGTCTGC  
TTTATGCTTTTGTGGAGACCCGGGACAATACTTCTACATTACAGCATTGGCATATGCTCATTGCGGGC  
AGTGTGGGCTTCTGCTGCCCCCTCGTGCCAAGACTGACCACGGGGTCCCATCTGGAGCCCCGGGCCGGGG  
CTGTGGTTACCAGCTATGCATCAACGAGCAGGAGGAGCTGGGCCTCGTGGGCCAGGAGGGGCCACTGTCA  
GCAGCATCTGTGCCAGCTGAGAGGGCTTTGGGCCTGGCCCTGAGGGGATATGAATGCTTCTAGAGTTCT  
TTCTGGGGGTGTGGAGCCCTCTTAGAAGGAGACAGGCTGTATTTCTTGAGGACATGGAGTCTTTCTCAAGG  
ACACAAAACCTTCCAGGGACCTGGAGCCCTTCCCAGGACATGGAGAATCTCTGAGGGCCTGGAGTCCCC  
CTGCATCATGGAGTCTTCTTAAGGACTGGAGCCTATGCAGGCACAGAGTCCCTCAGGACCAAGGAGTCCC  
TCCTGCAGGTGTGGAGCCTTCTTGGGATGCAGAGCCTTCCCAAGACATGGATTCTTCCCAGGGAGACAA  
AGCCCTGTGAGGACACAGCATCTTCCAGAGGAGGTGGAGTCTATCTTGGGAAAACCAAATTTCCAGATT  
TTCCCAGAGGCTCAGCAACTCTGGCCTCAGGCTTCTTCCCAGAGGCAGCGTCTGGGCTGTGCTGTGCTGT  
GGAGGAGGATTGAGGATGGATGGAGCTGGGACTGGGCTGTCTGGGTGGCTGTGATCTCGTTTGTGATA  
AGGTGGAGTCTGTGTCTCCAGTATTGATTGGTTGAGAATGGTTCTGTGATGCCTTTTTTTCCCCCTGGG  
GTCAGGGGTGTGGGAAAGTGGGAAAGAGGGCCCTCAGGGAATCAGCAGGGCTGATGGGAGCTACTGCCG  
GAGGCTTTTTGTACACCCTGTACACAGTCTGATCCCGCTCATCTGGGCCCTGCATTCAATTTCTAAACAGTT  
TCTAATGCCTATTTCCCAATTCCTATTGAGCCCGATTTGCAGTATCTGAGGGGTGTGTGTGTGTGTGTG  
TGTTTATGTATGTATACGTATGCTGAGATGATTTAAATCAGTGAGACAGACTTTCTTATGATGCCACAC  
CCAACACAGAAGGAAGCCGAGGTCCCAGGAAATTGGAATAGCAGGTACACGTCTCAGGTGTGCAAGAAATA  
TCACAAGAATGTAACCTTCTGTTTTGAGCCCCCAAAAAAAAAAAAAAAAAAAAAAAAAAAAAAAAAAAAAA

LLLLFSVLGPGAGGLFLTDYSTCSPRKLSPFRSFASTELFHFHVPEDTFLAVWNLIIKFKEQGGTFGDHCPD  
QSVTVYFRSGAPPVINPLHTHFPGDTAVPGVFSLTLSWTLNRTSGIFNVSSPLPGDWFLAAHLPQAHGHI  
SVKGLQDECQYLLQPQLIVRRLLDVAVLVPGRPSEQTLSPHNRSALYKVFVPSFTYRVSAQLVCVGGRGVS  
ACPLSLRLRPKAPPLHNSSVACGGASGCQLELALPPWGHVYVRVETSSRGPGRTRIRFQLCVRLQECQPQ  
GLLRALVPGAAMNMPQSLGNQPLPPEPPSLGTPAEGPGTTPPEHCWPVRPTLRNELDTFSVHFYIFFGPS  
VALPPERPAVFAMRLLPVLDSSGVLSLELQLNASSVRQENVTVFGCLTHEVPLSLGDAAVTCSKESLAGFL  
LSVSATTRVARLRIPFPQTGTWFLALRSLCGVGRFVRCRNATAEVRMRTFLSPCVDDCGPYGQCKLLRTH  
NYLYAACECKAGWRGWGCTDSADALTYGFQLLSTLLLCLSNLMFLPPVVLAIRSRYVLEAAVYFTMFFST  
FYHACDQPGIIVVFCIMDYDVLQFCDFLGLSLMSVWVTVIAMARLQPVVKQVLYLLGAMLLSMALQLDRHGLW  
NLLGPSLFFALGILATAWTVRSVRRRHCPPTWRRWLFYLCPGSLIAGSAVLLYAFVETRDNYFYIHSIWHM  
LIAGSVGFLLPPRAKTDHGVPSGARARGCGYQLCINEQEELGLVGPGGATVSSICAS

AUG initiation = 51.9 kDa  
CUG initiation = 84.0 kDa

+++++

#2

# NM\_001037335

The GUG appears conserved in most primates but not in galago where it is AUG as it is in all other mammals

## PRIC285 peroxisomal proliferator-activated receptor A interacting complex 285

Synonyms: PRIC285; PDIP-1; FLJ00244; KIAA1769; MGC132634; MGC138228

AGAATCGAAACTGAGAGCTCCTGGGCAGGCTCGGCAGGGCAGGCAGCTCCAGGAGGGCTTCGAACCGTGGC  
CAACAGTTCCAGTGGACTGCGTGGACCCG**TGAG**GCTCAGGAGCCTCAGACGCCTCCCTGGAGAGCCAAGCTG  
GTGTT**CGAG****GTGG**CGCCTCCAGGGTCCACCCTGCTGCCAACAGCCCCGCGGCCACCAGAGGGCCCTCCCT  
GGCCCCGCTGTGTGCCCTGGTGGACCTGTGTCTGGGCTGCTCCCGCTGCACCCAGCGGCTCA**ATG**AAAGCA  
CCTACGTCTCCGTAGGGTGGAGC**ATG**ACTGCTCCCGCGAGATCCTGCTGGCCCCGCTTTAAGCAGGCCACC  
AAGAGCAAGGTCTGGCGCGTGGTGGGCTGCCGGCCACCTTCCCAAGGCCCTGTGCTACCAAGTCTGCCA  
CTACTACAGCCCTGGGCTCGGCTGCCGGCGCCACCGAAACCGGTGCACCTTTGCCCGCAGTCGCGAGGAGG  
CCCTGGTCTGGACCTTCGAGCGTCAGCACAACTCCAGCGCCT**ATGG**GCTGAAGGCGGAGGTGCAGGGCAGC  
GGGGCCCAGGGAGGGGCGAGGCCGGGCGGCCAGCCATCCTTACGGAGTTTGGCGGCCGCTTCGAGCTGCT  
TTGCTCCCTCTGCTTCAGGCGCTGTCCCC**ATG**CATCTGTGCGGTGGACCCCCAGGGGCAGTGCCCTGAGC  
ACGGAGCCTGCCCTCCCTCCTGGCCACGTGAGCGCCGAGGGCCGCCGCAAGCAACAGTTTGTGGTGGTG  
AGGCCGCGGGCCCCGGGCCAGCCTCCTGCCTACTGCAGGTTTGTGGGGCGTGGGCAGCCGTGCTGGCG  
TGGGGAGTCCCCTGCCAGTTTGACACAGCGCCGTGGAG**ATGG**GCTGTGTGGGAGGCCGAGCAGCTGGGTG  
GCCTCCAGCGGGGGGACCTGCTCACACCCCTGCCCTGATGGCGACGGGCGCACGGCCCCCTTGGCCAG  
CCCCCTGGGGCCCAGCTGTACTGCCCGGCTGCTTGGTCACTTCCACTCTCAGGAGGCCTTCGAGAACCA  
CTGCGCATCCTCGGAGCACGCACAGATGGTGGCCTTCGACCAGGCCCTGCCCTGGGAGCACCGTTCCCCAC  
CCCCGAGCTTCCAAGTTCGAGCTCTGCCAAAGCTGACCTCTGTGAGTATGGGACGCCTGCACCAAG  
GCACACTCAGCACAGGAGCTGCAGGAGTGGTCCGGCGCACGCAGGCTGTGGAGCTGCGGGGGCAGCCGGC  
CTGGCAGGACGGGCTGGTGCCCTACCAGGAGCGGCTGCTGGCCGAGTACCAGCGCAGCAGCAGTGAGGTCC  
TTGTGCTGGCAGAGACCCTTGATGGAGTGCCTGTCACCTGCAACCAGCCCCTGATGTACCAGGCCAGGAG  
AGGAAGACCCAGTACAGCTGGACGTTTGGCGTCCACTCTGAGGAGCCCCTGCTACACGTGGCCCTGCTGAA  
GCAGGAGCCAGGAGCCGACTTCTCTCTGGTGGCTCCCGGCCCTCCCGCCAGGCCGGCTCTACGCACGGGGTG  
AGCGCTTCCGTGTGCCAGCTCCACTGCCGACTTCCAGGTGGGAGTGCCTGTGCAGGCTGCCTCGTTCGGC  
ACCTTTGAGCAATGGGTGGTCTTCGACTTTGGCCGCCGGCCGGTGTGCTGTACAAAAGCTGGGGCTGCAGCT  
GGGCCAGGGGCGTCGCCAGGACCCTGCAGGAATCTGGCGCTCGGCCACCCTGAGGAGATGGAGCGCTGGC  
ACACTGGCAACCGCCACGTGGTGCCTGGCGTGGAGCGGACGGCCGAGCAGACGGCCCTGATGGCCAAGTAC  
AAGGGCCCTGCCCTGGCCCTGGAGTTCAACCGCAGCAGCGTGGCCTCGGGCCCCATCTCACCAACCAACTA  
TCGGCAGAGGATGCACCAGTTTCTCTATGAGGAGGAGGCGGCTCAGCAGCAGCTGGTGGCCAAGCTGACCC  
TGCGGGGCCAGGTGTTCTGAAGACGGCATTGCAGACGCCAGCGCTGAACATGCTCTTCGCGCCTCCGGGA  
GCACTGTACGCAGAGGTCCCCGTCCCCCTCCTCCCTGATGCCAGACACAGACCAGGGCTTCTGTGTTGGCCG  
GGCGGTGAGCACAGCCCTGGTGGCCCCCTGTACCTGCACCCGACAATACGGTGTTCGAGGTGCGGCTGGAGA  
GGCGGGCCAGCTCAGAGCAGGCGCTGTGGCTGCTGCTTCCGGCCCCGCTGCTGCTTGGCCCTGGGGCTGCAG  
CCTGAGGCCCGCCTGGTCTGGAGGTGCAGTTCAGATTGACCCGATGACCTTCCGCCTCTGGCACCAGGC  
AGTGGACACACTGCCTGAGGAGCAGCTGGTGGTGGCCGACTTGGCCACCTGCGCCCTGCCAGACCTTGGT  
CTGTCCCACCTTGGCGGTGGCAACCGCAGCAGGAGCTGGCCGTGGCGCTCATCGCGGCTGGGGCCCT  
GGGATGGGAGGCGTGTCCCCCGCTACTCATCTATGGCCCCCTTGGCACCGGAAGACCTACACGCTGGC  
CATGGCCTCCCTGGAGGTATCCGGAGGCCTGAAACCAAGGTGCTCATCTGCACACACACCAACAGTGCCG  
CCGACATCTACATCCGGGAGTATTTCCACAGCCACGTGAGCGGCGGCCACCCCGAGGCCACTCCTCTCCGT  
GTGATGTACACGGACCGCCGCTGAGCCAGACGGACCCAGTACGCTGCAGTACTGTTGCCTGACCGACGA  
CCGCCAGGCTTTCGCCCCGCCACACGGGCAGAGCTGGCGCGGCACCGCGTGGTGGTACCACCACCTCCC  
AGGCCCGTGAGCTCAGGGTGGCGGTGGCTTCTTCTCCACATTCTCATCGATGAGGCGGCCAGATGCTG  
GAGTGGAGGCCCTCACCCCGCTGGCCTATGCCTCGCACGGCACCCGCTCGTGTGGCGGGCGACCAT  
GCAGGTACACCCCGGCTGTTCAGTGTGGCCAGGGCCGGGCGGCCGAGCACACGCTGCTGCACCGCCTCT  
TCCTGTGCTACCAGCAGGAGACTCACGAGGTGGCGCGGCAGAGCCGCCTGGTCTTCCACGAGAACTACCGC  
TGCACGGACGCCATTGTGAGCTTCTATCTCGCGCACTTCTACGTGGCCAAGGGCAACCCCATCCACGCCAG  
GGGCAAGGTTCCGCCCCACCCCGGCACTACCCGCTCATGTTCTGCCACGTGGCGGGCAGCCAGACCGGG  
ACATGTCCATGGCGTCTGGCTGAATCTGGCTGAGATTGCGCAGGTGCTCGAGAAGGTGCAGGAGGCCTAC  
AACACCTGGCCAGCTGCTGGGGCGGCCGCGAGCAGAGGTGCATCTGTGTGTTTTCCACGGTGGCCAGGT  
CAGTGCCTGAGGAGGAGCTGAGGAGGCGGGACCTAGGCCAGGTGTCTGTGCGGAGTTTTGAGATCCTGC  
CAGGGCGGCAGTTCGGGTGCTGGTGTGCTCAGCACTGTGCACACCTGCCAGAGCCTGCTCAGCCCTGGGGCA

CTGGCCCCTGAGTTCTTACCGACGCCCCGCGTGCTCAACACCGTCCTGACCCGCGCCCAGTCCCAGCTGGT  
GGTAGTGGGGGACGCCGTGGCCCTCTGCTCCTTCGGGGCCTGCGGCAAGCTCTGGGAGAGCTTCATCCGTG  
AGTGCGTGGAGCGGCACAGTGTCTGCCCCGAGGGCCTGTCCATGGAGCAGGTGAGCAGGGTGTGGCGCAG  
AGACGGCGCTGGCCTCCCCGAGGCACACAGGCTGGGGCAGCGGGGAACTGGGAGGCTGCCCCAGAGCCAGT  
AGGGGACCTGGCCGAGGAGCAGGCGGCTGTGGTGACGGCCATGGTGAAGGCAGAGCCGGGAGATGAGGCTC  
TGAGCCCAGCATCCCCTGACATCACGGCAACCACAGCGCAGACGGAGGCTGCGGCAGCACCAGCAGGAGAC  
GCAGTGAAGGAAGACGTGGTGGCCGGGGCCTGTGCGGCAGGAGCGGCTGCTGCAGCGGGCGTGGAGTCCAC  
GGAGGCTGAGGATGCAGAGGCTGACTTCTGGCCGTGGGACGGGGAGCTCAACGCTGACGACGCCATCCTAC  
GGGAGCTTCTGGACGAGAGCCAGAAGGTGATGGTGACCGTCGGGGAGGACGGGCTGCTGGACACTGTCGCC  
AGGCCCCAGTCCCTGCAGCAGGCCCCGGCTGTACGAGAACCTGCCCCGGCTGCGCTACGGAAGCTGTGTCA  
CGCGGAGCCCCGAGCGGTACCGCCACTGCTCTTTCGTGCCAGAGACCTTCGAGCGGGCGTCCAGCCATCCCCG  
TGGACGATGCCTCCTCGGGCCCCATCCAGGTGAGGGCCGCTGGACTGTGGGATGGCCTTCGCCGGGAT  
GAGGTGCTGGTGCAGCTCCTTTCGGGAGACAAGGCGCCCGAGGGGCGGCTTCGGGGCCGCGTGTGGGCGT  
GCTGAAGAGGAAGAGGCACGAGCTGGCGTTTTGTGTGCCGCATGGACACGTGGGACCCGCGCATCATGGTCC  
CCATCAATGGCTCCGTGACCAAGATCTTTCGTGGCCGAGCTGAAGGACCCATCGCAGGTCCCCATCTACAGC  
CTCCGGAAGGGCCGGCTGCAGCGTGTGGGGCTTGAGAGGCTCACCGCCGAGGCCCCGGCACAGCCGGCTCTT  
CTGGGTCCAAATTGTCTGTGGCGGCAAGGCTTCTACTACCCGCTGGGCATCGTCCGGGAGGTGCTGCCTG  
AGGCCAGCACCTGGGAGCAGGGCCTCCGCATCCTCGGCCCTGGAGTACAGCTTGAGGGTGCCTCCGTGCGAC  
CAGGCCACCATCACCAAGGTGCTGCAGAAATACCACACGGAGCTTGGCCGGGTTGCCGGCCGCGAGAGGA  
CTGCCGCGCCTTCTTGACCTTCACTGTGGACCCCCAGGGCGCTGCAACCTCGATGATGCCCTCAGTGTCC  
GAGACCTGGGTCCCAGGTGCGAGGTGGCTGTGCACATCACTGATGTGGCCAGCTTCGTGCCAGGGACGGG  
GTGCTGGACGTGGAGGCGCAAGGCAGGGCGCTGCGTTCTATGCCCCGGCAGGGAGCCAGTGCCCATGCT  
GCCGGCCAGCCTCTGCCAGGACGTCTCAGCCTCCTGCCTGGCCGGGACCGCCTGGCCATCTCCCTGTTCC  
TCACCATGGAGAAGGCCAGTGGCCAGCTGAAGAGCCTGCGCTTTGCACCCTCCGTGGTCCAGTCTGACCGC  
CAGCTGTCTACGAGGAGGCGGAGGAGGTGATCAGGCAGCACCCGGGTGCCGGCCGTGAGCTGCCGGCCCCG  
CCTGGACTCCGTGGACGCCTGCGTGTGGCCGCGTGTACTTCTCTCGGCTGCTGCGCCGGCACCCGCTGC  
GGTCCGACTGCTTCTATGAGCAGCCGGACGAGGACGGCACCCCTGGGCTTCCGCGCGGCCACATCATGGTG  
AAGGAGTACATGATTCAAGTTAATAGGCTCGTGGCTGAGTTCCTGGTGGGACGCGATGCACGCGGACGGT  
CACGCCCTGTCGGTGGCAGCCAGCACCCCGCAGCAGCTCAAGGCCCTGTGTGAGAAGCATGGGAGCC  
GGGTCCCCCTGTCACTGCACCTCGGCCACCACCTGCACGGCGGGGGCAGTCCCCCGACAGCGGGCTG  
CACCTCCTGGCCTCCCTCTGGAAGCAGGTCCAGTTTGTGCTGCCCGCACCCAGGACTACGAACAGATGGTGA  
CTTGGTCAACACGGACGACATGCACCCATTCTGGCTCCTGCAGGCCGCGACCTCCGCAAGGCCCTGGAGC  
GCTCGGCGTTTCGGCCGCTGCGCCCCGGGGCCACCAGCAGCAGGGCGGCCACTACTCGTGCAGGTGGACTGG  
TACACGTGGGCCACCTCGCCCATCCGCAGGTACTTGGACGTGGTGTTCAGCAGCGCAGATCCTGCTGGCGCT  
GGGCCATGGGGGCTCTGCCTACTCTGCCAGGGACATCGATGGGCTCTGCCAGGCCTTCAGCCTCCAGCACG  
CACTTGGCCAGAGCTATCAGCGGCGGGCGCGCAGCCTGCACCTGGCCGTGCAGCTCAAGGCCACGCTCTG  
GACAAGCTGGGCTTCGTGGTGGACGTGGAGGCGGGCTCCCGCTGCTTCCGGCTGCTCTTCCCCAGCAACCG  
GGAGACGCTGCCTGACCCCTGCCCCGTCCCTACGGCTCCCTGCAGCTGGCCGAGCACCCCCACGCCCTGG  
CAGGCCGGCCGGGCTGCGGCTCCTGTGGCGGCGCCGTGTCTACTCAGCGCAGGGATCCAGCCCCGCCCTG  
CCACTGCCTGGCACTGTGCCGACCCACACACCCTGGCCGTGGAGACGGCCCTGTGGAAGCAGCTGCTGGA  
GCTGGTGGAGCTGCAGCGCTGGCCGGAGGCGGCTGCTCTCATCCAGGAGAAGGGCGAGGCGTCCCAGCGGC  
GGGAGCTGGTGCAGGTGCAGCGGAGCCACTGTGGCCATTTCTGGAGGTGGCCCGGGAGCTGGGCAGTGGG  
GACACCCTGCAGGTGCAGCTCGGCACCAGCCTGCAGCACGGCTTCTGGTACCGAGCCCTCAGCTCTGGAC  
GGTGGCACCCGGCTTCAGCCTCTGCCTGGAGCACGTGGAGCGGCCCGGAGACTGCTTCTCAGGCCGTGTGT  
ACCGGGCCCCGAGGGACCGGTACCGCGACGTGGATGAGTACGCCTGCGTGTGGGAACCATTCTGCGCCCTG  
GAGTCGGCCACCGGCGCGGTTGCCGAGAATGACTCCGTCACTTCAGCACCTGAGTGTCTCCTGGGAGGC  
GTACGGACCGCCGAGGGCAGCTGCAGGGCGCCTTCGCGCTGGAGGCCGCTTCTCGAGGAGAACTGTG  
CCGACATCAACTTCAGCTGCTGCTACCTCTGCATCCGGCTCGAGGGGCTGCCGGCTCCCACGGCCAGCCCA  
CGCCCTGGGCCCAGCAGCCTCGGCCCTGGCCTGAATGTTGACCCCGGCACGTATACTGGGTGGCCACGG  
GCAGACGCAGGACTGGGACCAGGAGCGCCGGGCAGACCGGCAGGAGGCTCCCAGACGGGTGCACCTCTTCG  
TCCACCACATGGGCATGGAGAAGGTTCCGGAAGAGGTGCTGAGGCCGGGCACCCTGTTTACCCTTGAGCTG  
CTGCCCAAGCAGCTTCTGATCTCCGCAAGGAGGAAGCCGTGCGTGGACTAGAGGAGGCGTCCCCGCTGGT  
CACCAGCATCGCACTGGGCCGGCCTGTCCCGCAGCCCCTCTGCAGAGTGATCCCCAGCAGGTTCTGGAGC  
GGCAGACCTACAACATCCCCGGAGGCCGCCACAAGCTGAACCCAGCCAGAAGCTGGCGGTGAGGGAGGCT  
CTGGAGAAGCCTTTCACGGTCATTACGGGCCACCAGGTACAGGGAAGACGATCGTGGGCTCCACATCGT  
ATTCTGGTTTCATAAATCAAACCAGGAGCAGGTGCAGCCCGGAGGCCCCCCCGTGGGGAGAAGCGGCTGG  
GGGTCCCTGCATCTTGTACTGCGGCCCTCCAACAAGTCGGTGGATGTCCTGGCAGGACTGCTCCTGAGA

AGGATGGAGCTGAAGCCCCTCCGTGTGTACAGTGAGCAGGCTGAGGCCAGCGAGTTCCCAGTGCCGCGTGT  
GGGCAGCAGGAAGCTGCTCAGGAAGAGCCCCGGGAGGGGAGGCCGAACCAGAGCCTCAGGAGCATCACCC  
TGCACCACCGGATCCGGCAGGCCCCCAACCTTACTCGTCGAAATCAAGGCCTTTGACACCCGGCTGCAG  
AGAGGGGAGCTCTTCTCCAGGGAGGACCTGGTCTGGTACAAGAAGGTCTTGTGGGAGGCTCGGAAGTTCGA  
GCTGGACCGGCATGAGGTCATCCTCTGCACCTGCTCCTGTGCAGCCTCTGCCAGCCTCAAAATCCTGGACG  
TGAGGCAGATCCTTGTGACGAGGCAGGCATGGCCACGGAACCTGAAACCCTCATCCCCCTGGTGCAGTTC  
CCACAGGCCGAGAAGGTGGTCTTCTCGGAGACCACAAGCAGCTGCGGCCTGTGGTCAAGAATGAGCGGCT  
GCAAAACCTGGGTCTGGACCGGTCTCTGTTTCGAGCGGTACCACGAGGACGCACATATGCTGGACACTCAGT  
ACCGCATGCATGAGGGCATCTGTGCCTTCCCCTCTGTGGCGTCTACAAGAGCAAGCTGAAGACGTGGCAG  
GGCCTGAGGAGGCCCGCCAGTGTCTGGGCCACGCTGGCAAGGAGAGCTGCCCTGTATCTTTGGCCACGT  
GCAGGGCCACGAGCGGAGCCTGTGGTGTCCACGGACGAAGGGAATGAGAACTCCAAGGCCAACCTGGAGG  
AGGTGGCTGAGGTGGTCCGTATCACCAGCAGCTGACCTGGGGAGGACCGTAGAGCCCCAGGACATCGCC  
GTCCTCACGCCCTACAACGCGCAGGCCTCTGAGATCAGCAAGGCCCTTCGGCGAGAGGGCATCGCCGGGGT  
GGCCGTGTCTCCATCACCAGAGCCAGGGGAGCGAGTGGCGCTATGTGCTGGTGTGAGCACCGTCCGCACCT  
GTGCCAAGAGCGACCTGGACCAGCGGCCACCAAGAGCTGGCTCAAGAAGTTTTCTGGGCTTCGTTGTGGAC  
CCCAACCAAGTGAATGTGGCTGTACGCGGGGCCAGGAGGGGCTCTGCCTGATCGGAGACCACCTCCTTCT  
GCGCTGTGCCCTCTGGCGTAGCCTCCTGGACTTCTGCGAGGCTCAGCAGACCCTCGTGCCTGCCGGCC  
AGGTGCGCGTCTGCAGGAGGCCAACTATGCCTTCTGAGAGCCCTCTCCACCTGCAAGGTGCCAGGACTG  
GGAGGGAAAGTCCAGGGCCCCCACCCTCCCCACCACCCTCCGCCATCAGCCTGCCTGGGCCAGCCTGCC  
TCCTGGCCTCAGGATCTCCCTGGGGCAGGAAGTGGGTGGACTTGGAGGAGGAACGGCAAGGGCCGGTCCCC  
ACACTCTTGCTCCTCCTGGGCATCTGGGGACAGGAACACCTCTCAGGGTGGCCAAGAGGGGCTTCTTGGG  
ACCAGTGAAGGAAGTTCTGCTGTCCCTGGGAAGTCTCAGAACCAGGAAGGAAACCTGTGGAGGCTGCC  
TTTGACCTTTGGACGCCACCTGTAATCACTCTGGATGGTGTCTGTGGAGTTCAGGTTTTATTTTCTATTTAA  
ATGAACTAAAAGCCAGCATCCTGCCGGGCGTGGTGGCTCACGCCATAATCCAGCACTTTGGGAAGCCGAG  
GCGGGCAGATCACCTGAGGTGAGGATTCGAGACCATCCTGGCCAACATGGTGAACCCCGTCTCCACTAA  
AAATACAAAATTAGCTGGGCGTGGTGGCGGGCGCCTGTAATCCCAGCTACTTGGGAGGCTGAGGCAGGAGA  
ATCGCTTGACTCCAGGAGGCGCAGGCTGCAGTGAGCTCTGATGGTACCACTGCACTCCAGCCTGGGTGACA  
GAGCGAGACCCTGTCTTAAAAAAAAAAAAACAAAACAAAACCAGCATCTGTTACTGGAACAGAGACCTCAGCC  
CAAGCTCAGGACAAGGAGCCTCCCTGGGAGAGGGGGCTTTCTCCACCATCACCCTGTGTCTTCTCAG  
GGGCTGTGGAGGGCAGCCCAAAGCCAGGGGCCACCCCGCCACCCACCCACCCACCCCTCTGAAAT  
GTGAAAAGCCTGCACTCTTCTGTGGGCTGCGCAGTGGGCTCGGGGGTGGGGGGTGCCGGGGCGATGCTT  
CCACCCTGGACTGAGTGTTCCGGGCAGCCTGCTCGGCTGTATGTTTTCTGCGACGCTCACCCGCTTCAGTGC  
GGCTCTGTCCCTGCTGCCGCTCCAGTCTGAGGGAGGGGCTTGCCCCACCTTCTACATTCCAATTTTTAT  
ATCTTTGAATTATGTGATTAGATATTAATTTAATGATAAAACCCTCTGAAAGCTCTTCTCA

VAPPGSTLLPNSPAATRGP SLARLCALVDLCLGCSRCTQRLNESTYVLRVVEHDCSREILLARFKQATKSK  
VWRVVGCRPTFPRPLCYQVCHYSPGLGRRHRNRCTFARSREEALVWTFERQHNLRQLWLKAEVQSGAQ  
GGAGRAADAILTEFGGRFELLSLFCFRRCPPICRVDPQGQCPEHGACPSLLAHVSAEGRRKQQFVVVRPR  
PRAGQPPAYCRFVGRGQPCWRGESRCQFAHSAVEMAVWEAEQLGGLQRGDLLTPPAPDGDGRTAPLQPPG  
AQLYCPACLVTCHSQEAFENHCASSEHAQMVAFDQALPWEHRSPPPGLSKFELCPKPDLCYEGDACTKAHS  
AQELQEWVRRTQAVELRQAAWQDGLVPYQERLLAEYQRSSEVLVLAETLDGVRVTCNQPLMYQAQERKT  
QYSWTFVAHSEEP LHLVALLKQEPGADFSLVAPGLPPGRLYARGERFRVPSSTADFQVGVVQAASFQTFE  
QWVVFDFGRRPVLLQKLGLQLGQRRPGPCRNALALGHPEEMERWHTGNRHVVPVERTAEQTALMAKYKGP  
ALALEFNRSSVASGPI SPTNYRQRMHQFLYEEEAQQQLVAKLTLRGQVFLKTALQTPALNMLFAPPALY  
AEVVPVSSLMPD TDQGFLLGRAVSTALVAPVPAPDNTVFEVRLERRASSEQALWLLLPARCCLALGLQPEA  
RLVLEVQFQIDPMTFRLWHQAVDTLPEEQLVVLDLPTCALPRPWSVPLRRGNRKQELAVALIAGWPGDG  
RRVPLL IYGPFGTGKTYTLAMASLEVIRRPETKVLICTHTNSAADIYIREYFHSVSGGHPEATPLRVMI  
TDRPLSQTDPVTLQYCLTDDRQAFRPPTRAELARHRVVTTTSQARELRVPVGGFFSHILIDEAAQMLECE  
ALTPLAYASHGTRVLVLAGDHMQVT PRLFSVARARAAEHTLLHRLFLCYQQETHEVARQSRLVFHENYRCTD  
AIVSFI SRHFYVAKGNP IHARGKVP PHPRHYPLMFCHVAGSPDRDMSMASWLNLAIEAQVVEKQVEAYNTW  
PSCWGGREQRICV VSHGAQVSALRQELRRRDLGQVSVGSFEILPGRQFRVVVLSTVHTCQSLSPGALAP  
EFFTDARVLNTVLTRAQSQLVVVGDVAVALCSFGACGLWESFIRECVERHSVCPEGLSMEQVEQGVARRR  
WPPRGTQAGAAGNWEAAPEPVGD LAEEQA AVVTAMVKAEPGDEALSPASRDITATTAQTEAAAAPAGDAVK  
EDVVPGACAAGAAAAGVESTEAEADAEADFWPDGELNADDA ILLRELLDESQKVMVTVGEDGLLDTVARPE  
SLQQARLYENLPPAALRKL LHAEPERYRHCSFVPETFERASAIPLDDASSGPIQVRGRLCDGMFAFAGDEVL  
VQLLSGDKAPEGR LRGRVLGVLKRKRHELAFVCRM DTWDPRIMVPI NGSVTKIFVAELKDPSQVPIYSLRK  
GRLQRVGLERLTAEARHSRLFVWQIVLWRQGFYIPLGIVREVLPEASTWEQGLRILGLEYSLRVPPSDQAT

ITKVLQKYHTELGRVAGRREDCRFLTFTVDPQACNLDDALSVRDLGPRCEVAVHITDVASFVPRDGVLD  
VEARRQGAIFYAPGREPVPMLPASLQCQDVLSLLPGRDRLAISLFLTMEKASGQLKSLRFAPSVVQSDRQLS  
YEEAEVIRQHPGAGRELPARLDSVDACVVAACYFSRLLRRHRLRSDCFYEQPDEDGTLGFRAAHIMVKEY  
MIQFNRLVAEFLVGSSECTRTVTPLRWQPAPRSQQLKALCEKHGDRVPLSLHLGHHLHGSGGSPDTRLHLL  
ASLWKQVQFAARTQDYEQMVLDLVTDDMHPFLAPAGRDLRKALERSAFGRFCARGHQQQGGHYSLQVDWYTW  
ATSPIRRYLDVVLQRQILLALGHGGSAYSARDIDGLCQAFSLQHALAQSYQRRARSLHLAVQLKAQPLDKL  
GFVVDVEAGSRCFRLFPNRETLDPDPCVPYPSLQLAEHPHALAGRPGLRLLWRRRVYSAQGSPPPLPLP  
GTVPDPHTLAVETALWKQLLELVELQRWPEAAALI QEKGEASQRREL VQVQRSHCGHFLEVARELGS GDTL  
QVQLGTSLQHGFLVPSQLWTVAPGFSLCLEHVERPGDCFSGRVYRAPRDYRDVDEYACVWEFCALESA  
TGAVAENDSVTLQHLVSVWEASRTPQGQLQGAFLRLEAAFL EENCADINFSCCYLCIRLEGLPAPTASPRPG  
PSSLGPGLNVDPGTYTVAHGQTQDWDQERRADRQEAPRRVHLFVHHMGMEKVPEEVL RPGLTFTVELLPK  
QLPDLRKEEAVRGLEEASPLVTSIALGRVPVQPLCRVIPS RFLERQTYNIPGGRHKLNPSQNVAVREALEK  
PFTVIQGGPGTGKTIIVGLHIVFWFHKSNQE QVQPGGPPRGEKRLGGPCILYCGPSNKSVDVLAGLLLRME  
LKPLRVYSEQAEASEFPVPRVGRKLLRKS PREGRPNQSLRSITLHHRIRQAPNPYSSEIKAFDTRLQRGE  
LFSREDLVVYKQVWEARKFELDRHEVILCTCSAASASLKILDVRQILVDEAGMATEPETLIPLVQFPQA  
EKVVLLGDHKQLRPVVKNERLQNLGLDRSLFER YHEDAHMLDTQYRMHEGICAFPSVAFYKSKLKTWQGLR  
RPPSVLGHAGKESCPVIFGHVQGHESLLVSTDEGNENSKANLEEVAEVVRITKQLTLGRTVEPQDIAVLT  
PYNAQASEISKALRREGIAGVAVSSITKSQ GSEWRYVLVSTVRTCAKSDLDQRPTKSWLKKFLGFVVDPNQ  
VNVAVTRAQEGCLIGDHLRLCCPLWRSLLDFCEAQOTLVPAGQVRVCRRTMPS

AUG initiation = 294.6 kDa  
GUG initiation = 322.3 kDa

+++++

### #3

## NM\_00101858

Extension conserved from human to fish but non-AUG initiation conserved only in mammals. Many other human paralogs exist (incl. BRCA1) with the extension but initiated by AUG codon and part of a larger extension.

### RNF187 ring finger protein 187

Synonyms: RNF187

TC TAGCGAGGTGACAGCGTAGAACAGGTGCGCGTCCCCGGCGTTGGCGTCTTCGTCCTGTTGCTGGTCTC  
CGTCCGGTGC CGCGCCGTCTAGGTCTCCGGCCCTCCCCAGCCGCTCCTGCGCCCTTGCCGGCCCCGCCGCC  
CGCAGCC CTGGCGCTCCCTGCGGGCCCCGCCAGGCCGCTGCGCCCTGTGCCAGCGCGCCCCGGGAAC  
CGGTGCGCGCCGACTGCGGCCACCGCTTCTGTGCGGCGTGCCTGGTGCCTTCTGGGCCGAGGAGGACGGG  
CCCTTCCCGTGC CCGGAGTGC CCGACGACTGCTGGCAGCGCGCCGTGGAGCCCGCAGGCCCCCGCTCAG  
CCGCCGCTTCTGGCGCTCGAGGAGGCGCGCGCCGCGCGCGACGGCCCGCCAGCGAGGCCGCGC  
TGCAGCTGCTGTGCCGCGCCGACGCCGCCGCTCTGCGCCGCTGCCGT ATGGCTGCGGGCCCCGAGCCG  
CCCCGAGTGGGAACCGCGCTGGAGGAAGGCGCTGCGCGGCAAGGAGAACAAGGGGTCTGTGGAATCATGAG  
AAAGGACTTGAATGACGCCCGGGACCTGCATGGCCAGGCAGAGTCAGCAGCTGCAGTGTGGAAGGACACG  
TGATGGACCGTAGGAAGAAGGCACTGACCGACTACAAGAAGCTGCGGGCCTTCTTTGTGGAGGAGGAGGAG  
CATTTCTGCAGGAGGCTGAGAAGGAGGAGGGGCTCCCTGAGGACGAGCTGGCTGACCCCACTGAGCGGTT  
CAGGTCACTGCTGCAGGCGGTCTCGGAGCTGGAGAAGAAGCATCGCAACCTGGGCCTCAGCATGCTGCTGC  
AGTCA TGGCGCCAACCCGTGGCAGTCCCAGAGCTGGAGGCAGGAGGATGGATCCTCATCTCCATGGGAAGT  
GTCAGCGTGTGGCTGCCAGGAAGCGTGGCAGGCGCCTGGCCTTGGGTCCATCTACATAGTTGCGTGTTC  
ACAATGTCCATTTATCCTTACCCCGAGGCGTGT TTTGGGGGCTGCAAACACCTCCCGGTAGAGGCTGGA  
CCTGAGGACCCTTCCCACCTGTGCCCCTCCCTTCTGAAGTCTTAGCCACAGCCCATCCTCCATGAGTCCC  
GGCAGCTCTGGGT CATGCCCTTCCCTGGTCAACCATCTGCCCCACCTCGTCATCCAGGGACCCAGACCC  
TGCACCTTCCATGTGGGCCACAGATCCTTGGCAGGTACCTGAGGTGCACCATTTGAGTGTGGGATTTGGG  
TTAGCATCCAGAAAGAAGAATGCGCATGACGCTGTGTAAGGCTGGAACCTCAGGTCTTCAGGGAGAGAAAG  
GAAGACTGGATTGCACCTTGTATGCCTCCTGAGGAGCGGCCCCCTCTTGGAGTGGGCGTGGGCCCGGCC  
AGCCTTATCCAAGTCGCTCTGTCCACCTCCCCCTTCTGGCCCCACCCACTCCTGTGCCTCCCAGGAGC

CCTCCCTGTGCTCCACCTGCCTCCGCAGAAGGAAGCCTCTTTCTCTGTTTCCCTGGGTGAGGGGGCTGGCA  
GGTGGCTAACCCCATTTAGCATCTCCAGGCCCTGCCATCGTGTCTCATCTTGCTGTTATCTCTAGCTCTTT  
CCCTCCTCCCATTTCTTTAGTAGTTGAATTTTGCAAAGCTTGTAGCAGTAGCTCAGTTGCCTGCAGCATC  
CTTGTGTGTAGATAAATTAGTCGACAGAACTCAGCACTGGGGACAGGATTGCAAAGTCGGGGACATAGAT  
GCAGACAGTTGTTGAGATTTGGGGATAGCCGGGCTTGTGAGCGGTGCCATTTCCAGATGAAGCCTTTCAG  
CCCTTCTGAGTCCCGGGCCCTTGGTGCGATGTCTGTGAGTTTGACCTGCCAGCGTGTGGGCTGGCTCAAT  
GCTGAATAAAGTGGGTTTGTGTGAGCTCGTTTGCCTTCGTCTCCGTGTGTCCACCTGGCCTCTTCCCCCTGC  
CCTGGCCACCCTCCAGTGTCAAAGGAACTTCTCGTGACACGTGCTAAAGCATGGTGAGGAGGACTTTGA  
TTGGGACCATTGAGATGGGTGTGGGACCCTTTCCTTGGGGCCTGGGGGGAGATGGGGCTCCACCCGACGT  
AGCAGGGCAGGGGTTGGAGGAGCGAGGAGCAGTATAGGGTCCATGGGTGGGAATGACTGTGAGGAGACATC  
AGGGCTGAGGGGCTCTGGCTAAACCCACCTCACAGATCCTTGTCTGCAGGCAGGCAGGCGATCAGACAT  
TGGCTGCAAACGGTCAGAGAGGAACCCAGTCAGGTACCATTGAGGGTGGTCAGATATTATGGTTAACAAA  
TTAGGGTTCTTGCTAAAACCTGGATTTTATAAGAAAGGGCAAAGAGGGCCCTAGGAGAAGATTCCAGAGCCT  
GGCCAGAGTTTGGCCAAGTAGAGAATCTTTGTGACGACGCCAACACATCCCGACCCTGAGACCTCCAGTT  
TGTCTTTCTCACTGTCTCCGCCTGCTGCAGTCTGCTGTGATCCCTGAGCATCCCTGCCCTGCCCTGCACA  
CCTGTGATGCTTGGCCGACAGGTCCTGATGGCAGAGTCTCCACAACATCAGTGTCTCCACATCACCAGG  
TCCGACAGTGGCTTACCATCCTCACCTAACCTAGCTGACCAGCAACATCCACCCCTGTCAATCACAACCT  
CTTTCTATTTAAGAAAATTATATATTTATGGGGCACAGTG  
CGTCCTGTTGCTGGTCTCCGTCCGGTCGCCGGCCGTCTAGGTCTCCGGCCCTCCCCAGCC

LALPAGPAEAACALCQRAPREPVRADCGHRFCRACVVRFWAEDGPFPCPECADDCWQRAVEPGRPPLSRR  
LLALEEAAAAPARDGPASEAALQLLCRADAGPLCAACRMAAGPEPPEWEPRWRKALRGKENKGSVEIMRKD  
LNDARDLHGQAESAAAVVWKGHVMDRRKKALTDYKKLRAFFVEEEEHFLQEAKEEGLPEDELADPTERFRS  
LLQAVSELEKKHRNLGLSMLLQ

AUG initiation = 14.6 kDa  
CUG initiation = 26.2 kDa

+++++

## #4

### NM\_001136108

CUG initiated extensions in mammal; in non-mammals extension is initiated by AUG  
In *Bos taurus* the longest AUG initiated in-frame CDS is only 9 codons long!

#### R3HCC1 R3H domain and coiled-coil containing 1

Synonyms: DKFZp564N123; R3HCC1

CTCGGGCGCGCTGGCCCTGGGGACGCCGAGGGCGGGCTGCGACGCGCCGAGAGGGCCGCGGCTCTCCCACCT  
GTCACCCTGGCCCTTCTCTGCTTGGATGGTGTCTTCTCTCCTCAGCCGAGAATGACTTCGTCCACCGGAT  
CCAGGAGGAACCTGGACCGCTTTCTGCTGCAGAAGCAGCTGTCAAAGGTTCTTCTTTTCCCCCACTCTCCA  
GTCGCCTCCGGTACCTGATCCATAGAACAGCAGAGAATTTGATCTCTTGAGCAGCTTCTCCGTTGGGGAG  
GGCTGGAAGAGGAGGACGGTCATCTGTACCAGGACATCAGGGTACCCAGTTCCGATGGCCTCTCTGGCCC  
CTGCCGCGCTCCTGCCTCCTGCCCCAGCAGGTACCACGGTCTCGGCCATCTCCAACCAAGGAGCAGCTG  
CGGTTCCCCGAGGTGCCCGGCTGGCCGGTGGTATCGTGACGCAAGCCTGACCAGCCTTTGTATGTGCC  
CGGGTGCTGCGCAGGCAGGAAGAATGGGGCTGACCTCTACCTCGGTGCTCAAGAGAGAGGCCCCAGCTGG  
CAGGGACCCAGAAGAGCCTGGAGATGTTGGTGCTGGAGACCCCAACTCTGATCAGGGACTCCCTGTGCTGA  
TACTCAGGGAACAGAGGACCTAAAGGGCCCAGGACAAAGGTGTGAGAATGAGCCACTGCTGGACCCTGTT  
GGCCCTGAGCCTCTGGGGCCTGAGAGTCAGTCAGGGAAGGGAGACATGGTGGAGATGGCCACACGGTTTGG  
GTCCACCCTGCAGCTAGACCTGGAAAAGGGGAAGGAGAGTCTGTTGGAGAAGAGGCTGGTGGCAGAGGAGG  
AAGAGGACGAAGAGGAGGTGGAAGAGGATGGCCCCAGCAGCTGCTCGGAGGACGATTACAGTGAGCTGCTG  
CAGGAGATCACAGACAACCTGACGAAGAAGGAGATTCAGATAGAGAAGATCCATTTGGACACATCCTCCTT  
CGTGGAGGAGCTGCCTGGAGAGAAGGACCTTCCCCACGTGGTAGAGATCTATGACTTTGAACCAGCAGCTCA  
AGACGGAGGACCTGCTGGCAACGTTTTCTGAGTTCCAAGAGAAGGGGTTCAGGATTCAGTGGGTGGATGAT  
ACTCACGCACTCGGCATCTTTCCCTGCCTGGCCTCAGCTGCGGAAGCCCTGACCCGGGAGTTCTCGGTGCT

CAAGATCCGGCCCCCTCACACAGGGAACCAAGCAGTCAAAGCTCAAAGCCTTGCAGAGGCCAAAACTCCTGC  
GTCTGGTGAAGGAGAGGCCACAGACAAATGCGACTGTGGCCCGGCGGCTGGTGGCCCGGGCCCTGGGACTC  
CAACACAAAAAGAAAGAGCGGCCTGCTGTCCGGGGTCCGCTGCCGCCCTGAGGCCTGGAGACCCAACTGGC  
CTGGATCTGCGTCCCAGCTAGCTGGCGCCCCAACACCATAAGCCTTACAGACGCCAGAGCAGCCCCGC  
ACCACCCTCGAGCTTACCATGGGGTGTGGTGGGCTTTAGTTTTAGTCCAGAAATGGAGAAAAATAAAAA  
CTCACGTTGTTCTAATGTGAAAAAAAAAAAAAAAAAAAAAAAAAAAAAAAAA

LALLCLDGVFLSSAENDFVHRIQEELDRFLLQQLSKVLLFPPLSSRLRYLIHRTAENFDLLSSFSVGEW  
KRRTVICHQDIRVPSSDGLSGPCRAPASCPSRYHGPRPISNOGAAVPRGARAGRWRGRKPDQPLYVPRV  
LRRQEEWGLTSTSVLKREAPAGRDPPEEPGDVAGDPNSDQGLPVLMTQGTEDLKGPGQRCENEPLLDVPGP  
EPLGPESQSGKDMVEMATRFGSTLQLDLEKKGESLLEKRLVAEEEEDEEEVEEDGPPSSCEDDYSELLQE  
ITDNLTKKEIQIEKIHLDTSFVEELPGEKDLAHVVEIYDFEPALKTEDLLATFSEFQEKGFRIQWVDDTH  
ALGIFPCLASAAEALTRFVSVLKIRPLTQGTKQSKLKALQRPKLLRLVKERPQTNATVARRLVARALGLQH  
KKKERPAVRGPLPP

AUG initiation = 28.3 kDa  
CUG initiation = 49.1 kDa

+++++

## #5

### NM\_003760

AUC initiated extension in mammals - In other vertebrates extension is initiated by AUG  
EIF4G3 eukaryotic translation initiation factor 4 gamma, 3

Synonyms: eIF4GII; EIF4G3

TCACGCGTCCGCTGCTCGTGTGAGTGAAGAAAATCCACCGGCATCGCCTGAGCCCCGCTACCGAGAAGGGCG  
CCGCTTCCTCCGGGGAGGGGATAAAGATCCCCCGCCCGGCCATGAGGATATTGCCGTGAAAGGCACA  
GCGACTGCAGCAGGAACCGGACCCGGCACCAGGAGCGGCGGGCGGCGGCAGCAGCGGTACCGCCTCCTCA  
CCCGGCGGGCAGCAGCGGGCGGGCGGGCGGGCGGGCGGGCGGGCGGCAGCGGTCCCCCTCCTCACC  
CGAACATCAGGGCCCTCCAGACTCAGGCGCCCCAACAAATTCCTAGAGGACCTGTGCAACAACCTCTTGG  
GATCGAATCTTCACTCCCGCTGTCTCAGCAGTCTACAGCACGGTAACACAAGTGGCAAGACAGCCGGGAAC  
CCCTACCCCATCCCCTTATTAGCAGCATGAAATAAACAAGGGGCATCAAATCTTGGCGCAACGCCCCCGG  
GACATGCATCGTCCCCTGGACTCTCTCAAACCCCTTATCCCTCTGGACAGAATGCAGGTCCAACCACGCTG  
GTATACCCTCAAACCCCTCAGACAATGAATTCACAACCTCAAACCCGTTCTCCGTTTTTCCAGAGGCCTCA  
AATACAGCCTCCTAGAGCTACCATCCCGAACAGCAGTCCCTCCATTTCGTCTGTCACAGACACCCACTG  
CAGTGTACCAGGCTAATCAGCACATCATGATGGTTAACCATCTGCCCATGCCGTACCCAGTGGCCAGGGG  
CCTCAGTACTGTATACCACAGTACCGTCATAGTGGCCCTCCTTATGTTGGGCCCCCAACAATATCCAGT  
TCAACCACCGGGGCCAGGTCTTTTTATCCTGGACCAGGACCTGGGGACTTCCCCAATGCTTATGGAACGC  
CTTTTTACCAAGTACAGCCGGTGTATCAGTCAGCACCTATCATAGTGCCTACGCAGCAACAGCCGCCTCCA  
GCCAAGAGAGAGAAAAAACTATAAGAATTCGGGATCCAAACAGGGAGGTAAAGACATAACAGAGGAGAT  
TATGCTGGAGGTGGCAGCAGAAATCCTACTCCACCATAGGAAGACCCACGTCCACACCTACTCCTCCTC  
AGCAGCTGCCAGCCAGGTCCCCGAGCACAGCCCTGTGGTTTATGGGACTGTGGAGAGCGCTCATCTTGCT  
GCCAGCACCCCTGTCACTGCAGCTAGCGACCAGAAGCAAGAGGAGAAGCCAAAACAGATCCAGTGTTAAA  
GTCTCCTTCCCCAGTCTTAGGCTAGTCTCAGTGGAGAGAAGAAAGAACAAGAAGGCCAGACATCTGAAA  
CTACTGCAATAGTATCCATAGCAGAGCTTCTCTGCCTCCATCACCTACCACTGTTTCTTCTGTTGCTCGA  
AGTACAATTGCAGCCCCACCTCTTCTGCTCTTAGTAGCCAACCAATATTACCACTGCTATAGATGACAG  
ATGTGAACTCTCATCCCCAAGAGAAGACACAATTCCTATAACCCAGCCTCACATCTTGACAGAAACATCAG  
ACCCTTTACCAACAAATGAAAATGATGATGATATATGCAAGAAACCCTGTAGTGTAGCACCTAATGATATT  
CCACTGGTTTTCTAGTACTAACCTAATTAATGAAATAAATGGAGTTAGCGAAAAATTATCAGCCACGGAGAG  
CATTGTGAAATAGTAAACAGGAAGTATTGCCATTGACTCTTGAATTGGAGATTCTCGAAAATCCCCAG  
AAGAAATGAAACTGGAGTGTATCCAGCTCCCATCACCCCTCCACAGTTCCTTCTTCTTCTCCAACCTCCT  
CCAACCTCCTCCAGCTTCTCCTCCTCACACTCCAGTCATTGTTTCTGCTGCTGCCACTACTGTTAGTTCTCC  
GAGTGTGTCATCACAGTCCAGAGAGTCTAGAGGAGGACGAGAGCATAAGAACTTGCCTTAGTGAAGATG  
CAAAAGAGATTGAAACAAAATAGAGGTAGAAGCAGATGGGCAACAGAAGAGATTTTGGATTCTCAAAAC

TTAAATTCAAGAAGGAGCCCTGTCCCAGCTCAAATAGCTATAACTGTACCAAAGACATGGAAGAAACCAA  
AGATCGGACCCGAACCACTGAAGAGATGTTAGAGGCAGAATTGGAGCTTAAAGCTGAAGAGGAGCTTTCCA  
TTGACAAAGTACTTGAATCTGAACAAGATAAAATGAGCCAGGGGTTTCATCCTGAAAGAGACCCCTCTGAC  
CTAAAAAAGTGAAGCTGTGGAAGAAAATGGAGAAGAAGCTGAGCCAGTACGTAATGGTGCTGAGAGTGT  
TTCTGAGGGTGAAGGAATAGATGCTAATTCAGGCTCCACAGATAGTTCTGGTGATGGGGTTACATTTCCAT  
TTAAACCAGAATCCTGGAAGCCTACTGATACTGAAGGTAAGAAGCAGTATGACAGGGAGTTTCTGCTGGAC  
TTCCAGTTCATGCCTGCCTGTATACAAAAACCAGAGGGCCTGCCTCCTATCAGTGATGTGGTTCTTGACAA  
GATCAACCAACCCAAATTGCCAATGCGAACTCTGGATCCTCGAATTTTGCCTCGAGGACCAGACTTTACAC  
CAGCCTTTGCTGATTTTGGAAAGGCAGACACCTGGTGGAAAGAGGCGTACCTTTGTTGAATGTTGGGTACGA  
AGATCTCAACCTGGCCAAAGAAGAGAACCAGAAAGATCATCACAGTTTCTGTAAAAGAAGATGTACACCT  
GAAAAAGGCAGAAAATGCCTGGAAGCCAAGCCAAAAACGAGACAGCCAAGCCGATGATCCCGAAAAACATTA  
AAACCCAGGAGCTTTTGTAGAAAAGTTTCAAGTATCTTAAATAAATTGACACCAGATGTTCAATCAACTG  
ATGAAGCAAGTGTGAGGACTTACTGTTGACACAGAGGAGCGGCTGAAAGGAGTTATTGACCTGGTCTTTGA  
GAAGGCTATTGATGAACCCAGTTTCTCTGTGGCTTACGCAAAACATGTGTGATGTCTAGTAACGCTGAAAG  
TACCCATGGCAGACAAGCCTGGTAACACAGTGAATTTCCGGAAGCTGCTACTGAACCGTTGCCAGAAGGAG  
TTTGAAAAAGATAAAGCAGATGATGATGTCTTTGAGAAGAAGCAGAAAAGAACTTGAGGCTGCCAGTGCTCC  
AGAGGAGAGGACAAGGCTTCATGATGAACTGGAAGAAGCCAAGGACAAAGCCCGGCGGAGATCCATTGGCA  
ACATCAAGTTTATTGGGAACTCTTTAAACTCAAATGCTGACTGAAGCCATCATGCATGACTGTGTGGTG  
AAGCTGCTAAAGAACCATGATGAAGAATCCCTGGAGTGCCTGTGTGCGCTGCTCACCACCATTGGCAAAGA  
CTTGGACTTTGAAAAAGCAAAGCCACGTATGGACCAGTACTTTAATCAGATGGAGAAAATTGTGAAAGAAA  
GAAAAACCTCATCTAGGATTTCGGTTCATGCTTCAAGATGTTATAGACCTAAGGCTGTGCAATTGGGTATCT  
CGAAGAGCAGATCAAGGGCCTAAAACATCGAACAGATTACAAAGAGGCTAAAATAGAAGAACAAGAAGA  
GCAAAGGAAGGTCCAGCAACTCATGACCAAAGAGAAGAGAAGACCAGGTGTCCAGAGAGTGGACGAAGGTG  
GGTGGAACTGTACAAGGGGCAAGAACAGTCCGGTACTGGACCCCTCAAATTCCTAAAAATCACTAAG  
CCTACAATTGATGAAAAAATTCAGCTGGTACCTAAAGCACAGCTAGGCAGCTGGGGAAAAGGCAGCAGTGG  
TGGAGCAAAGGCAAGTGAGACTGATGCCTTACGGTCAAGTGCTTCCAGTTTAAACAGATTCTCTGCCCTGC  
AACCTCCAGCACCCCTCAGGGTCCACGCCATCCACGCCTGTAGAGTTTGATTCCCGAAGGACCTTAACTAGT  
CGTGGAAAGTATGGGCAGGGAGAAGAATGACAAGCCCTTCCATCTGCAACAGCTCGGCCAAATACTTTTCA  
GAGGGTGGCAGCAAGACCTGCTAGACAATCAGTCTCAAGAAGAGCAGCGGAGAGATGCTGGAGA  
CCGTGAAGCAGCTCACAGGAGGTGTGGATGTGGAGAGGAACAGCACTGAGGCTGAGCGAAATAAAAACAGG  
GAGTCAGCAAAAACCAGAAAATTTAGCAATGTGAGCTCATGACAAGGCTGCATTATCAGAAGAGGAAGTGA  
GAGGAAGTCGAAATCTATCATTGATGAATTTCTACACATTAATGATTTTAAAGGAAGCCATGCAGTGTGTGG  
AAGAGCTGAATGCCAGGGCCTACTACATGTTTTTGTGAGAGTGGGAGTGGAGTCCACCCTGGAAAGGAGC  
CAGATCACCAGGGATCACATGGGCCAATTACTCTATCAGCTGGTACAGTCAGAAAAACTCAGCAAAACAGGA  
CTTTTTCAAAGTTTTTTCAGAAACTTTGGAATTGGCAGATGACATGGCCATTGATATTCCCATATTTGGT  
TGTACCTTGCTGAACTGGTGACCCCATGTTAAAAGAAGGTGGAATCTCCATGAGAGAACTTACCATAGAA  
TTTAGCAAACCTTTACTTCTGTTGGAAGAGCTGGGGTCTTGCTATCTGAAATATTGCACCTACTATGCAA  
ACAAATGAGCCATAAGAAAGTGGGAGCCTTATGGAGGGAGGCTGACCTCAGCTGGAAGGACTTTTTACCAG  
AAGGAGAAGATGTACATAATTTTCTTTTGGAGCAGAAGTTGGACTTCATAGAGTCTGACAGTCCCTGTTCC  
TCTGAAGCACTTTCAAAGAAAAGAACTGTCTGCCGAAGAGCTGTATAAGCGACTCGAGAAAACCTATTATTGA  
GGACAAAGCGAATGATGAACAGATCTTTGACTGGGTAGAGGCTAATCTAGACGAAATCCAGATGAGTTCAC  
CTACATTCCTTAGAGCTTTAATGACTGCTGTTTTGTAAAGCAGCTATTATAGCCGACTCTTCTACCTTCAGA  
GTGGACACTGCTGTTATCAAGCAGAGAGTGCCGATCTTACTCAAGTACCTAGACTCAGATACAGAGAAGGA  
ACTGCAAGCACTTTATGCACTACAAGCATCGATAGTAAAACCTTGATCAACCTGCCAATTTGCTGCGGATGT  
TTTTTGATTGTCTATATGACGAGGAGGTGATCTCCGAGGATGCCTTCTACAAATGGGAGAGCAGCAAGGAC  
CCTGCAGAGCAGAATGGGAAGGGCGTGGCTCTGAAATCTGTACGGCATTCTTACGTGGCTGCGGGAAGC  
AGAAGAGGAGTCTGAGGATAACTTAAACTTCAAATACACAAAATGAAACAAAAGAAAACAATTTAAGTATTT  
TTTTAAAAAGTTTTACGTCTTTCGCCAATCACAGTGCAGCAAGGCCAATTTCTCGCAGAAACCCCCACGTGTG  
CACGAGTGGGAGAGGGGAAAAGAGAAAAAAGGTGATCATGGAGGAAAAAGGTAAGTGGATAAAAAGTAAACTT  
CAAACCTTAGGGCGGGAGCACTAAAACCAAATACATGTATTATTTATAGAAAATATTTTCTGTTTTAATC  
TTTTCTTTTTTAAACAAGGACTCATACTTAAAAAATGTTTAGCAAAAAAAAAAAAAAGTTGAGAACTTTTTAA  
TTTATTTTTAAGGACTGCAAATGCCAGTGAATTTTTTAAATTTGCAGTTTCTGTAAACAACCTGTATAATAG  
AAAAGCAGAGAAATAAATTTCCCTCCCCTTCAAGATGCACCTCATGTTTGTTTTTAAGGTATAGCATTTAGT  
CCAGATTTGAGAAAAGTTTGGGGTGAACAAGGTAAGAAAGATTTTTTTTTTTTTTGGCATCAAATCTTTCTGC  
CTGCCTCTCAGCTTGCTTCAGAAAATTTAAAAAATCACAATAGTAATCAAACATACATAACATTGAAACA  
GAAGGAAATGCTGTGGACCACAGAACTCCAAGAATTTGTTAAAAAAGAAAGTGTACCTGAGAAAAGT  
ACTCTTAATACTCTTGAATCTTTAGAGCAACTTTAAGGCTTGTAATACATAGAACAATATTTAAAAA

ACAAAAAGAAATTGACTCAGTACTATTTCTTTTCACTTTGAAAATATAAAGAACAAAATAAAGACAAACAT  
TGCAAGTTTTAAAAAAAAAAAAAAAAAAAAAAAAAAAAA

THRHRLSPATEKGAASSGEGDKDPPPPAHEDIAVKGTATAAGTGPGTGAAAAAAAAAVPPHPAAAAAAAA  
AAAAAAAAAVPPHPNIRALQTQAPQQIPRGPVQQPLEDRIFTPAVSAVYSTVTQVARQPGTPTSPYSAHE  
INKGHPNLAATPPGHASSPGLSQTPYPSGQNAGPTTLVYPQTPQTMNSQPQTRSPFFQRPQIQPPRATIPN  
SSPSIRPGAQTPTAVYQANQHIMMVNHLMPYPVPQGPQYCIQYRHSGPPYVGGPPQQYYPVQPPGPGPFYP  
GPGPGDFPNAYGTPFYPSQPVYQSAPIIVPTQQQPPPAKREKKTIRIRDPNQGGKDITEEIMSGGSRNPT  
PPIGRPTSTPTPPQQLPSQVPEHSPVVYGTVESAHLAASTPVTAASDQKQEEKPKPDPVLKSPSPVLRVL  
SGEKKEQEGQTSETTAIVSIAELPLPPSPTTVSSVARSTIAAPTSSALSSQPIFTTAIDDRCELSSPREDT  
IPIPSLTCTETSDPLPTNENDDDICKKPCSVAPNDIPLVSSTNLININGVSEKLSATESIVEIVKQEV  
PLTLELEILENPEEMKLECIAPITPSTVPSFPPTPPTPPASPPHTPVIVPAAATTVSSPSAAITVQRVL  
EEDESIRTCLSEDAKEIQNKIEVEADGQTEEILDSQNLNSRRSPVPAQIAITVPKTKKPKDRTRTTEML  
EALELELKAEEELSIDKVLSESEQDKMSQGFHPERDPSDLKVKVAEENGEAEAPVRNGAESVSEGEIDANS  
GSTSSGDGVTFFPKPESWKPTDTEGKKQYDREFLLDFQFMPACIQKPEGLPPI SDVVLDKINQPKLPMT  
LDPRILPRGPDFTPAFADGRQTPGGRGVPLLNNGVSRSSQPGQRREPRKIITVSVKEDVHLKKAENAWKPS  
QKRDSQADDPENIKTQELFRKVR SILNKLTQMFNQMLKQVSGLTVDTEERLKGVIDLVFEKAIDEPSFSV  
AYANMCRCLVTLKVPMDKPGNTVNFRKLLLNRCQKEFEKDKADDDVFEKKQKELEAASAPEERTRLHDEL  
EEAKDKARRRSIGNIKFIGELFKLMLTEAIMHDCVVKLLKNHDEESLECLCRLTTIGKDLDFEKAKPRM  
DQYFNQMEKIVKERKTSSRIRFMLQDVIDLRLCNWVSRRADQGPKTIEQIHKEAKIEEQEQRKVQQLMTK  
EKRRPGVQRVDEGGWNTVQGAKNSRVLDPKFLKITKPTIDEKIQLVPKAQLGWSGKSSGGAKASETDL  
RSSASSLNRFSALQPPAPSGSTPSTPVEFDSRRTLSRSGSMGREKNDKPLPSATARPNTFMRGGSSKDLLD  
NQSQEEQRREMLETVKQLTGGVDVERNSTEAERNKTRSAKPEISAMSAHDKAALSEELEKRSKSIIDF  
LHINDFKEAMQCVEELNAQGLLHVFRVGVVESTLERSQITRDHMGQLLYQLVQSEKLSKQDFFKGFSETLE  
LADDMAIDIPHIWLYLAELVTPMLKEGGISMRELTIEFSKPLLPVGRAGVLLSEILHLLCKQMSHKKVGAL  
WREADLSWKDFLPEGEDVHNFLLEQKLDIESDPCSSEALSKKELSAEELYKRLEKLIIEDKANDEQIFD  
WVEANLDEIQMSSPTFLRALMTAVCKAAI IADSSTFRVDTAVIKQRPVILLKYLDSDTEKELQALYALQAS  
IVKLDQPANLLRMFFDCLYDEEVI SEDAFYKWESSKDPAEQNGKGVALKSVTAFFTWLREAEEESEDN

AUG initiation = 176.7 kDa  
AUC initiation = 195.0 kDa

+++++

## #6

### NM\_006375

Extension conserved from human to fish but non-AUG initiation conserved only in mammals

#### ecto-NOX disulfide-thiol exchanger 2 (ENOX2), transcript variant 1

Synonyms: APK1; tNOX; COVA1; ENOX2

GTGTGTGAGAGTCCAGCCTTGGGCCAGAGTGCCGGGTCTAGGCCTGGAAGCGCGAGGCGGGCATTTCGGAA  
GAGAGTGGCGCGGCGTGGGGCGCCGCGAGGGCACTACGAGCCCAGGAAGTCCGCGCCGGCCCCGATTTTCC  
GCGGCTGTATAAGGACTAGCGCTTCGGTAGCCGGGAGCTGGAGGGAACCTGATTGAGATCAATTCTTGG  
AGAACACAAAGAAGTGTGATGATTGAACAGCTGCCCTTTGACCCTGCTAACAACAACGAGCCCCTGCAG  
TTTGGTAGTGCCAGTGGCCCTCTGGTCACAGAAGGCCTCATTGAGAAATGGAGGGGAATCAAGCAAGAAAAG  
AAAGAGAACAATACTCCTTCAGCCGATAACAGTAGAACTCTGAACGTGGATTCCACTGCAATGACACTAC  
CTATGTCTGATCCAACCTGCATGGGCCACAGCAATGAATAATCTTGAATGGCACCGCTGGGAATTGCCGGA  
CAACCAATTTTACCTGACTTTGATCCTGCTCTTGAATGATGACTGGAATCCACCAATAACTCCAATGAT  
GCCTGGTTTGGGAATAGTACCTCCACCAATCCTCCAGATATGCCAGTAGTAAAAGAGATCATACTACTGTA  
AAAGCTGCACGCTCTTCCCTCCAAATCCAAATCTCCACCTCCTGCAACCCGAGAAAGACCACCAGGATGC  
AAAACAGATATTTGTGGTGGTCTGCCTGAAAATGGGACAGAGCAAATCATTGTGGAAGTTTTGAGCAGTG  
TGGAGAGATCATTGCCATTCGCAAGAGCAAGAAGAACTCTGCCACATTCGCTTTGCTGAGGAGTACATGG  
TGGACAAAGCCCTGTATCTGTCTGGTTACCGCATTTCGCTGGGCTCTAGTACTGACAAGAAGGACACAGGC

AGACTCCACGTTGATTTTCGCACAGGCTCGAGATGACCTGTATGAGTGGGAGTGTAAACAGCGTATGCTAGC  
CAGAGAGGAGCGCCATCGTAGAAGAATGGAAGAAGAAAGATTGCGTCCACCATCTCCACCCCCAGTGGTCC  
ACTATTAGATCATGAATGCAGCATTGTTGCTGAAAAATTTAAAAGATGATTCCAAATTTCTCAGAAGCTGTA  
CAGACCTTGCTTACCTGGATAGAGCGAGGAGAGGTCAACCGTCGTAGCGCCAATAACTTCTACTCCATGAT  
CCAGTCGGCCAACAGCCATGTCCGCCGCTGGTGAACGAGAAAGCTGCCATGAGAAAAGATATGGAAGAAG  
CAAAGGAGAAGTTCAAGCAGGCCCTTTCTGGAATTCTCATTCAATTTGAGCAGATAGTGGCTGTGTACCAT  
TCCGCCTCCAAGCAGAAGGCATGGGACCACTTCAAAAAGCCCAGCGGAAGAACATCAGCGTGTGGTGCAA  
ACAAGCTGAGGAAATTCGCAACATTCATAATGATGAATTAATGGGAATCAGGCGAGAAGAAGAAATGGAAA  
TGTCTGATGATGAAATAGAAGAAATGACAGAAACAAAAGAACTGAGGAATCAGCCTTAGTATCACAGGCA  
GAAGCTCTGAAGGAAGAAAATGACAGCCTCCGTTGGCAGCTCGATGCCTACCGAATGAAGTAGAATGCT  
CAAGCAAGAACAAGGCAAAGTCCACAGAGAAGATGACCTTAACAAAAGAACAGCAGCTGAAACTCCTGCAAC  
AAGCCCTGCAAGGATGACAAGTTACAGGTGGAAAAATGTTGGAAAATCTTAAAGAAAAGGAAAGCTGTGC  
TTCTAGGCTGTGTGCCTCAAACCAGGATAGCGAATACCCTCTTGAGAAGACCATGAACAGCAGTCCTATCA  
AATCTGAACGTGAAGCACTGCTAGTGGGATTATCTCCACATTCCTTCATGTTCAACCATTTGGAGCAAGC  
ATTGAATACATCTGTTTCTACTTGCACCGTCTTGATAATAAGATCTGCACCAGCGATGTGGAGTGTCTCAT  
GGGTAGACTCCAGCATACTTCAAGCAGGAAATGACTGGAGTTGGAGCCAGCCTGGAAAAGAGATGGAAAT  
TCTGTGGCTTCGAGGGCTTGAAGCTGACCTAAATCTCTTTGCCTAACAACTGGGATCCTGAAGATAAATA  
TGTGTTGGACAAGCATAGAAAGTGATTTATATTTTTAATGGTTTTCAAGTGAAGTTCCTTTGAATTTGTC  
AGTTCATTCTGGAAAATCTTTTGGATTAATAAGGATCTTAGGACAGCACCTCGAACTACAGGCCCTAA  
AGAGAAATTCCTCAAACCACAAGTGTGTAACCTCCTCCCCTTTCTGTCAATTGGTTGTCTTTAAATATT  
GCAAAAGTCTGATGCTAAACAGTATTTGGAGTGTTCAGTGTCTGTACTACTGTTGTAGACCTTGGTAT  
TTTTTTAAACACTGTTAACTGAAATGTTTTGATGATTTGTATGTGATTTGTGTTTTCTAAACTTCTCTTTAC  
ATTAATGTTGTTACTGGTGAAGGCATGAGAGCAGCACTAAGTCTCTGTGTAACCTGCCATTGTCTTTCCA  
ATCCCCAGTAGACCAGTAAATAAATAACACATCAGTGTCTTCTAGAAGGTGCCTGACCAGGTTACCTTTT  
AAACGACAAAGCATGGTTTTGTGGCTTTTTGCAAAATTACTATGAACCAAAAGTTGACAAATGTTCCAAAGT  
TATTTTCTCTAACATATCACATTAAGATCTGTTTTCAGAATTGTAAAAAGTACATCTAGATGTGTTTACAG  
AAAGCAAGTATCCAGTATGACTGGCATGTGTTTATGCTATTGTAATCACTTGTAAATAGTCTGCTTTTAA  
AGGAGGCATGTTTCAAGTTTCTGTGAATTAATAATGCTCATTGTGTGGGCACACAGCACAAACACACACA  
CGCAGCGCACAGTGGCAGAGGGATTTATTAATATTCTTTCCCCTCTGGCCTTCTTACAGTCTGTTGG  
TCCCTTTGCTTCTGTTGTGAGTGTGTTGAATTGCAACCAGTACTGCTGTAAATACTATGTTTACTTTCAT  
GCTGAATGTTTGCAAAGACTTGATATAAGTATTAATAGTAATGAATCAATGAATAAATAATGAGCTAGGGT  
TTGTGAGGCTTTCTACAAATAGGTGAGCTCCACCTGGAGTGCGAATTGCCAGAGACACCTTGGTAGTGCC  
ATCGGCAAAATCGCAATGGCAGCATGTGAGTGGACCATTGAGAACTTCTGCTTGGTGGAAAGTAAACAGAG  
AGGATGGAGGTTTTGGGGCGAATGTCCTGAGGCAGAGATGGTCTTTATTGTGTGTGGTGGTGTGTTGTTAT  
TTATAATAATGCAAGCATACCCTCCCTTGGAGTCTCAATTGAAGATAAAAAGAAATGTAAGTACTGAGCAAGCAAAGC  
CAATGGAGAGTATTTACAAAAATACTTTGTAATGAGATGCCAGTAGTGTCAAAGTTGTATTTTTAAAA  
GATAAATATTCTTTTTTATACCTCAGTTTTGTGTCCTGTTTTAATGACTTACGCTCTAAGTAATCCATTA  
GTAGTTATCTCAGTTCCTTCTTTGGGTTACTAGAATGTTGGAAAAGATGCCAAGTCTGTCTTGACAACCT  
GGAAACAGGGTTCCACAGCAGCCATTTCGTGCTGAAAAGTGGCTTCCCCTGAAGCACCTGCTGTGGCAC  
CAGCAGGAAGCTCAGGTTAATTTTACACTAGCTTGCTCACTGATGCATCTCTCATCAATGCTACGGAAGGC  
TTTGATTTCATCAGTCTCGGGCTCTTGGAAATACCTAATTTTAAATAATATCTATGAAATCAAGGGAACTTTC  
CATTTACAGTTATTTCTTGTTTAAATAAACTAAATTAATTTTTAGGGGAGAGCAGTAGGAAAAAGAGCTAA  
TGCATGCGGGGTTTTAATACCTAGGTGATGGGTTGAGGTGCAGCAAAACCACCATGGCACACGTTACCTAT  
GTAACAAACCTGCACATCTGCACATGTACCCCGGAACTTACTTAAAA

LNQLPFDPANNEPLQFGSASGPLVTEGLIENGESSKKRKRNTNTPSADNSRTLNV DSTAMTLPMSDPTAW  
ATAMNNLGMAPLGIAGQPILPDFDPALGMMTGIPPIIPMPPLGIVPPPIPPDMPVVKEI IHCKSCTLFPP  
NPNLPPPATRERPPGCKTVFVGGLPENGTEQIIVEVFEQCGEIIAIRKSKKNFCHIRFAEEYMVDKALYLS  
GYRIRLGSSTDKKDTRGLHVDFAQARDDLYEWECKQRMLAREERHRRRMEERLRPPSPPPVHVHSDHECS  
IVAELKDDSKFSEAVQTLTWTIERGEVNRSSANNFYSMIQSANSVRRLVNEKAAHEKDMEEAKEFKQA  
LSGILIQFEQIVAVYHSASKQKAWDHFTKAQRKNI SVWCKQAEERIRNIHNDEL MGIRREEEMEMSDEIEE  
MTETKETEE SALVSQAEALKEENDSLRWQLDAYRNEVELLQEQGVHREDDPNKEQQLKLLQALQGMQQ  
HLLKVQEEYKKKEAELEKLDKDLQVEKMLENLKEKESASCASRLCASNQDSEYPLEKTMNSSPIKSEREALL  
VGIISTFLHVHPFGASIEYICSYLHRLDNKICTSDVECLMGRLOHTFKQEMTG VGASLEKRWKFCGFEGLL  
LT

AUG initiation = 66.6 kDa  
ACG initiation = 73.0 kDa

+++++

#7

**NM\_176677**

UUG/CUG initiation in mammals, birds and reptiles (and maybe all vertebrates)

**FLJ36208 hypothetical protein FLJ36208**

Synonyms: FLJ36208; NHLRC4

CAGCCACCCAGCCCCGAAGCAGGGCCCAGCGAGACAGGGCCCAGCCCCAAGCGTGA<sup>TGA</sup>CCCAGCTGCAGAGAA  
GCTGAGACGGTGATTCCGACTGACTGGACTCTGGCCTCCAGGTGTCTGCACCTCACA<sup>CTGG</sup>ACCCACCTGG  
AGACTCCACGGGCTCCCGGCAGCTCCGGCTGCTTGGGTGGATCCGGGTGCCCGCAGGGGCTGTGGGAGGGC  
CCCGGGCCTGCACTGCTCCCCGATGGCCTGCTCTTCTCACGGCCGGGGCTGCACCCTGTGTCCACGTG  
CTAGATCTGGAGGGACGCCCATCTGCCTCCTGCCCTGCCGCACTCCGGGGAGCGGGCCTTCGTTCCAGA  
GGACGTGGCTGTGACAGCGTCAGGGCTTGTGGTGGTCAGCGATCCCATCCATGGGGCTGTCCATGCACTCC  
AGCACACAGCCCGGGACCCCGGGGGCCACTGGGTGACAGTGGGCACCTTCTGTCTCCCCGAGGGCTGGCT  
GTGGATGCCCTCAACCGCCTCCTGGTGACGGACTACTTGCCTGGGGCTGTGCACAGCTTCTCGTTGGGTCC  
TGCTTGGGAGCCCCTGGCCCCAGCCTCCATGCTGGGTCTGGAGGGCCCCTGCTGGGTGGGCCCAGGGCCTG  
ATGGGGCCCTTGTGTGAGTGAGGAGTTTGGGGATGTGAGGCTGTTTGGCAGTGCCCGCCAACCCCTGGGC  
TCCCTGGGGGGCTGGACGGGGCACACTTTCGGCTGCCAGCGGGCATCTGCTCCAACCTCAGAGGGCAATGT  
TATTGTGGCAGACGAGCAGAGGGCCAGGTGACCTGTTTCCCCGGGCTGGGCCACCCATCTGCCTGGTGT  
CAGAGGGGCTTGGGCAGCCCTTGGGAGTGGCCTGTGCACCCAGGGCCAGCTCCTGGTGGCTGATGCCAAG  
GACAACCTCCATCAAGGTGTACCAGGGCCTCAAGGAGCTGGCC<sup>TGA</sup>CCTGAGGCTGGGTTGGAGCAGCCCTC  
CTGTGCCTGAGGCCAGCTCCCAGGCCCTTGGATCACCGCGGGAGGAACCCTCAGGATGGGTGGAGCCTCCA  
GGCTATGGGCATTGCCTGCCTGATGCCAGCACCACTGGGCTGGGGCCCTGGGCTTGGCTCGAGTTCTCCTG  
CTGGTGAGGCTCCGGATCTCAGGAGCAGCCCTGAGTCTGCTTCCCAGGCTGCCCTGCCAGGCCTGCAGCC  
TCCCCAGCCAGGGCTGCTCTCTGCTGTCCCCATTAGTGCCTTGGCCCTGCATTTCATGCCCCCACACCC  
CCTCAGGCCCTGTGCCTGGACTTTGGGGCTGGCAGCTGAAGCCTTGGATCCTGGGCCAGCTGCCGGCACA  
CAGCTAGGCAGACTCTCCACCAGGTGCCCTGCCAGGCCTCCTAATCGGGGGCAGACAGGCAGGGAGGG  
TGTGGCTGGGCTGGGCTGGGCGGGGCGGCCTGGGGCAGGGGTGTGGCCCCTAAATGTCCCCAACCTCAGAG  
GGACCTAGAGTCTGAGCCTCCAGTAGCTTCTCTGGGCCTGGCAGAGGTAAGGGGGAGGCAACCCTGGAGT  
GTCTGGAGGCCATGGCTGGCTGAACCCTGGATGCCTTTTCTTCCGCGTCCCATGAATGAAAGCTGTCTG  
GGCCTTCATTCTGCAGACAGGGACAAACAGCTCCATGCTGTTTGTCTCCAGTGCAGCCGTGCTGGGAGG  
GTCTGGGGGAGCTTCCCTACAAGGAGAGACTCCTGCTGCTTTGGAAAATGAGAAAAAATAGGGGTCTAACCC  
CTCTCCTCCCATTTTACAAGTGGGGAAATGAGGCGTGAAAGGAGAGGCGTCTGGGTACTCCGTGGGTCTG  
GGGTCCAGGGAAGGGCCTGTATGGGGGAGGGAGCTGGGAGGGGACGGTGTCTGGCTCTACCCCTGTGGGGT  
GGGGAGGTGGGGCTCCCCTGTATCACAGGACATCCCCCTGAGAGGTCCCTCATATGTCTGGGTCTGTGG  
GTGGGGGACTAACTGCGCAATGTAGTTAGGTGCTCAATAAACCGGAGTTGCCGCTGAAAAAAAAAAAAAAAAA  
AAAAAA

LDPPGDSTGSRQLRLLGWIRVPAGAVGGPRGLHCS PDGLLFLTAGAAPCVHVL DLEGRPICLLPCRTPGSG  
AFVPEDVAVTASGLVVSDPIHGAVHALQHTARDPGGHWVTVGTF LSPRGLAVDALNRLLVTDYLP GAVHS  
FSLGPAWEPLAPASMLGLEGPCWVGPGPDGGLAVSEEF GDVRLFGSARQPLGSLGGWTGHTFGCPAGICSN  
SEGNVIVADEQRRQVTLFPRAGPPICLVSEGLGQPLGVACAPQGQLLVADAKDNSIKVYQGLKELA

AUG initiation = 12.6 kDa  
CUG initiation = 28.6 kDa

+++++

#8

# NM\_153756

AUA initiation in humans - in all others, including gorilla and chimp, there is AUG in place of the AUA

## FNDC5 fibronectin type III domain containing 5

Synonyms: FRCP2; FNDC5

GCGGCCCGCCGGCGCCGAGCCGCGTCCCCCTGCGCCGCCCGGGCCTGCCGGCCGAGGAGCCACC<sup>ATA</sup>CC  
ACCCCGGGTTCGCCGAGCGCCTGGCCGCCCGCGCCCGCGCCGCTCCGCCTGTGGCTGGGCTGCGTCTGC  
TTCGCGCTGGTGCAGGCGGACAGTCCCTCAGCCCCAGTGAACGTCACCGTCAGGCACCTCAAGGCCAACTC  
TGCAGTGGTGAAGCTGGGATGTTCTGGAGGATGAGGTTGTATCGGATTTGCCATCTCCCAGCAGAAGAAGG  
ATGTGCGGATGCTGCGCTTCATCCAGGAGGTGAACACCACCACCCGCTCATGTGCCCTCTGGGACCTGGAG  
GAGGATACGGAGTACATAGTCCACGTGCAGGCCATCTCCATTGAGGGCCAGAGCCCAGCCAGCGAGCCTGT  
GCTCTTCAAGACCCCGCGTGGAGGCTGAGAAGATGGCCTCCAAGAACAAGATGAGGTAACCATGAAAGAGA  
TGGGGAGGAACCAACAGCTGCGGACAGGCGAGGTGCTGATCATCGTCTGGTCTGTTCATGTGGGCAGGT  
GTCATTGCCCTCTTCTGCCGCCAGTATGACATCATCAAGGACAATGAACCCAATAACAACAAGGAAAAAAC  
CAAGAGTGCATCAGAAACCAGCACACCAGAGCACCAGGGCGGGGGCTTCTCCGCAGCAAGATATGA<sup>AA</sup>AAAC  
CTTTTCAGTGCTTGCCTCAGCAGCTAAGAAGACAGACAGTAGAGAATGTGAGAGGATCTCATGGTCTGA  
TGATGATTATCCAACAAACATCTGGCCCTCTCTACATCTCTTCCCTCCATCTCCTTGTACCTCTGGCTTA  
CTGTCTCTCTCTGGCGCACTTCTCTGAAGCCTCTTATTAACCTCCATCTCCAGAAGCACCTCAACAATGT  
CAGTGGCTGAGGCTGCACTCAGAGGGATGACTGCTGGGGGTAGACTGGGTGCCAGGGGCCATGGGCCCAGG  
ACCCAGTCTTGGCCATTGAGTTGAGTGAAGGCTGGGTTTGAAGGCAAAAAGACAAGACATCCA  
GGCAGGCTTCTCTTTTCTTCCACAAGGGACAAGAGCTTGGCTTATTTAGGCTACAGCCCTGCTGCTGCT  
CCCTTCTTCTCTGCTGCTTCCAGCCTTGCAAGAAGCTATTACAATTAGGCCTGCTTCTCTC  
ATTTTTTCTCTCCAGTTTCCAACAAGCCCTCAGTGAACATCATTGAAGCGTACTGCTGCTGCAGGG  
AGAAGGATTCATTTTTCTCTCAGCTGGTCCCCAGGCCACGGGCACAGGGAGAGGGACAACCTGCAGCAG  
TGGGGAGGAGGCACAGCTAGCTGCACAGTTCTCTTCTCTTGTCTTAGTCAAGGAGGCTGCACT  
ACAAACCCAAATTCTGCAAAAAAATAAAAAATAAGCCACAAAACATAAAGGCCTGGCCCCATTCTGGAAAAG  
GCAAAGCTGCATGAGACACAGCCTTCTGCCTCTCGCCTCTCTGGACTGGCTTCTCTTTGAGAAAATGC  
ACAAAGCCCTGGGAGATGACAAGCACAAGGACTGACTCAAGCTGTGTCTTTTCCAGACCAAGGAACATCAGAG  
AAGCTGTGGGGCTGCCTGCCAGGCAGGATCATGGCTGCCATCAAGCCTTTTCTGGATCCAGCCATCAAGGA  
CATGTTTGTGGTGTGATGCACACTTTTGAAGCGTGTAAAGTGTACCTGGTTTGTCTCTTTTGGAAAACA  
AAAATCAGAAGGCTGCATTCTAGAGGGCAGAGAAATCCCCGAAGACTGAGCTGGTTGCCTGCATCCTCT  
ATCTTCTTTGACCCTTATGACTGAAAGATCATCAGTTTGAAGGTAAGTGGTCCAATTTATTTAGGAAGTAT  
CTCTTGGAGTTTCAAAAATGCTAGCTTGGACAACCTGAAAAGTCAATCACAGCTGGCATTCTGGGGGCTAC  
CAAAACACCCCTTCTGGAGTAGAAGCTGCTGGAAGGCAGGCCTGAGCCATTACCACGGACAGGAAGAGCA  
GCTCTGGCTATCACCCTGGCCTCTGGGGTCTTCATATCTTGGCATCTCATCCAGGGTTCATGAAAGTTA  
CCCAGGGTCTCATGTCTTCTTGGAGCCTGAGTGGTGTGAGGTGACAGGTCTCTCTCTCCACTGCCCT  
TTCTGGTTTAAAAAATGGTGTGTTGATGAGGGAAGGTAGACTCTTCCCTAGGACTGACGAGTTACGGCTGC  
CAGATGCCTGCATGGGAAGAGGTGGACATCTGCATCTTCCATTGGTGGTCAAGGATGGGTGTGGGAGAACC  
ACACCTAGTGAAGCCTGGTACTCAGTAAATATTTGTTGAAATGAATGATAAGAGCATTGGTCCCCAAGCC  
AGAGAGCCAGAAGCCATCACCCAATGACCCCTTCTTCCGGTCTACAAGAGCTCTCAAGGCTGGGTCT  
GCCACCCTCTGCTTTGCCAAGTGTGACAGCACTGGGGAGGAGAGACAGGATAAAGGGCAGATGTGAGCA  
ATACTAAGGGCTTCTCATGGGAGGGCATGAGGCTCCACTCATTGTCTTGTGACTTCCATCCCTGCTGAAT  
GGGGCTGCAAGGCCAAGGCTCCTTAGGGGAGAGGTCTTACCTCTGATCCACTTAGAGCAATAACCACTTT  
TAAATGTAAAATAAAAAAGACAAATGAAAAGGCAAAAAAAAAAAAAAAAAA

IHPGSPSAWPPRARAALRLWLGCVCFALVQADSPSAPVNVTVRHLKANSVVSWDVLEDEVVIGFAISQQK  
KDVRMLRFIQEVNTTTRSCALWDLEEDTEYIVHVQAIISIQQSPASEPVLFKTPREAEMKASKNKDEVMTMK  
EMGRNQQLRTGEVLIIVVVLFMWAGVIALFCRQYDI IKDNEPNNNKEKTKSASETSTPEHQGGLLRSKI

AUG initiation = 15.5 kDa  
AUA initiation = 23.6 kDa

+++++



CCGCAGCTATCTGCCCGCTGTCACCGCACTTACAGCTGTGTCCACTGCCGTGCACACCTGGCCAAACACG  
ATGAGCTTATTTCCAAGTCCTTCCAAGGGAGCCATGGCCGAGCCTACCTGTTTAACTCCGTGGTCAACGTG  
GGTTGCGGGCCAGCTGAACAGCGCCTCTTGCTCACGGGGCTCCACTCGGTAGCTGACATTTTCTGTGAGAG  
CTGCAAAACCACACTGGGCTGGAAATATGAGCAAGCTTTTGAGACGAGCCAGAAGTACAAGGAAGGGAAAT  
ACATCATTGAAATGTACACATGGTGAAGGACAACGGCTGGGACTGAGGGGCTCAGGCAGGGTGTGCCCTT  
CCTCCGCATGCCCCCTCCCTCCCCACGGCCCTGCCAAGCAGTCTATAACCAGCATGAGTACTGCCCCACCCCT  
GGGGGAAACCTGGCTCCAACCAACCCCTCCCTGCCTCCACCATATCCACTACCAGGCACCCCTTTAGAACA  
GGGGTCTGGGGGTACCCAGGGGTGTTAAGGCTCAGGAGTGGGCAGCAGTCAGGGAGAGACAGAACTGGGG  
GAAAGGGATGGTTGTGGGTCTTTCTGTTCCCAAGATCCTGAACATGGAAGCGATGGCAGGGCATAGACTCA  
GGCAGAGGGATTGTGGGAGGAATCCGTTTTTGTCTCCACCTCTTTTTGAGTGAACAGAGGACAAACCTTGG  
GTCACAGGGCAAGTAGATCATGGACCACAGAACAGCAGATGAGAAAAGACTTGGGTTGGAGTGAATTTCTG  
GTCTCAGACACCAGGACAGAGTCTCTGAGGATGAAGTTTTCTACCCCTATTTGTAGGGAAAAGGACTT  
GAGTGCAGGGAAAACCTCAAATCCCAGGCCCTGGGAAATAGTAAAATAATCAAAGGGTTTTCCATTTCACTC  
CACTTGTAGTTTTATCTTGGCACTGAAGAGGCACCTTTCGAGTATCTAACTTTTTGCCATTGGGTGGGGTGGG  
GACAGCTGCTCGCGGAACAGCCCCTAGTCGGCTGCTTCCAGAGTAAGCAGTCTTTATGGGCTTTCTCTGAG  
GCCCAGTCACTGCTCCTGGGACCCAGTCCCCTGGAGGGGAGGTGGAAAATCAGTGCTACGGGGCCAGTCTT  
TCCCGTGGCTGCCACCAGCGAATGAAACTTTTTGTATGATACATAAAGTGCTTGAGTCTATTTTTTAATAAAA  
AGGGAAAAAGCAACTTGAAAAA

TALANLLRCFTCDRLCGGCTAPAPPAHQIVLQPVMPSCDPGPGPACLPTKTFRSYLP RCHRTYSCVHCRA  
HLAKHDELI SKSFQSGHGRAYLFNSVNVVVGCGPAEQRLLLTGLHSVADIFCESCKTTLGWKYEQAFETSQK  
YKEGKYI IEMSHMVKDNGWD

PROBABILITY of export to mitochondria: 0.3552 with extension  
PROBABILITY of export to mitochondria: 0.2821 w/o extension

AUG initiation = 14.3 kDa  
ACG initiation = 17.9 kDa

+++++

## #11

### NM\_182528

Non-AUG initiation conserved in vertebrates

#### C1QL2 complement component 1, q subcomponent-like 2

Synonyms: CTRP10; C1QTNF10; C1QL2

GCTGATGACATGAGGGCTCCGTCTCCCGAGTGATGGCAGCGCGCTGCTTCGCCGCCTCCGCCGCTCAGC  
CCCGGACTCCTTACGTCAGGGTAGCGGGGTCCCCCTCCGCGCGGGAGCCAGCGAACAGCGAGAGAGCACA  
GCAGAGCGCGCCGCGGAGCCGGGGCGCCCTCACTGCGCTAGGAGCCCCACTAAACCCAGCGGAGCGGAGCC  
TGGCGGGAGGCAGCGCCGCGGAGCCAGCGCCGACGCCGCAAGCAGACTCCCGGCCAGCGCAAGCACTCC  
CTGGCCGGCGCCGACCCCTCGGGGCGCCGATTCTGTTGTGTGCCCCACGTCATGCGCGCGGGCGTCCGC  
GGTCTCCCGACCAGCCCCAGCGCGGTGGGCCAGGTCAGAGGTCGCGGCCTCTCGCTGAAGTAGTTG  
GGTACCCGGGGTGGGGTGCACAGTCCGGGGCGCGCCAGGACCCGCGGAGCCGTTCCCGAGCGCGGG  
GAGCGGGCCGCGCCGCGCCACCATTACCTCCCGGGCGCAAGGAGGAGCTGGTGGCGGTGCGCTC  
CCGGCTGTGGCAGCGGGCGGCGTGCCTGCGCTGGCGGCCGTGGCGTACTCTTGGCCATGGCGCTCGGGC  
TGCTCATCGCCGTGCCGCTGCTGCTGCAGGCGCGCCCCGAGGCGCCGCGCACTATGAGATGATGGGCACC  
TGCCGCATGATCTGCGACCCCTTACACTGCCGCGCCCGCGGGGAGCCCCGGGTGCAAAGGCGCAGCCACC  
CGGACCCAGCACCGCCGCCCTGGAAGTCATGCAGGACCTCAGCGCCAACCCTCCTCCTTTTATCCAGG  
GACCCAAGGGCGACCCGGGGCGACCGGGCAAGCCAGGGCCGCGGGGGCCCCCTGGAGAGCCGGGCCGCT  
GGACCCAGGGGCCCTCCGGGAGAGAAGGGCGACTCGGGGCGGCCCGGGTGGCAGGGCTGCAACTGACGGC  
GGGCACGGCCAGCGGCGTGGGGTGGTGGGCGGGGGCCGGGGTAGGTGGCGATTCCGAGGGTGAAGTGA  
CCAGTGCCTGAGCGCCACCTTCAAGCGCCCCAAGATCGCCTTCTATGTGGGTCTCAAGAGCCCCACGAA  
GGCTATGAGGTGCTGAAGTTCGATGACGTGGTACCAACCTCGGCAATCACTATGACCCACCACGGGCAA

GTTTCAGCTGCCAGGTACGCGGCATCTACTTCTTACCTACCACATCCTCATGCGCGGGCGGCGACGGCACCA  
GCATGTGGGCGGACCTCTGCAAGAACGGGCAGGTCCGGGCCAGCGCCATTGCACAGGACGCCGACCAGAAC  
TACGACTACGCCAGTAACAGCGTGGTGCTGCACTTGGATTAGGGGACGAAGTGTATGTGAAGCTGGATGG  
CGGGAAGGCTCACGGAGGCAATAATAACAAGTACAGCACGTTTCTCGGGCTTTCTTCTGTACCCGGATTAGG  
GGCGCGGGGGGTGCGAGGCGGGGTGGCTGCAGGCCGCCCGGTCTCCGCCCGGGCGCGGCTCCTTGGCAAAG  
GCCACTCTCGATTATAACTTCTGACATCTCCTTTGGAAAAGACAAATCCCTGCGTCTCCTGCCCTGCCCC  
GCTCCTGGCCTCAGTGCCTGCGACCCACCACGCTCAGGGCTGTGCTCCTGGTCTCCATCCCCATCCCGG  
CAAGGGAGGAAGGGACGCCGAGCCCTTGAGGCGGCGGCACAGACTTTGCAAACCTGATTAGACTGGACAG  
GCAGGGCCGGGAGCCTGCCCTCCTCAGACAGCCTCCTCCCAGTGCCTAGAAGCGGAGGGCTCCGGGCCCTG  
GCCAGGGAGGTAGGCCAGAGGGAGCGCGGGCTTCTGGGGCGTCTTCTTTGTGACCCGAAATACTTGTGC  
AGATTTCCCTGTCCATCAGCCAAAACCCACCCACAGCAGAATTCCAGCAAACAGAAAATTCACCTCTCCA  
CACCGCATTCCCTCCTGACTCAGACTCACCGCATGCATTAATTATGTTTTTACTATG

ITSPGGKEELVAVASRLWQRRRRACLAAVGVLLAMALGLLIAVPLLLQAAPRGAHYEMMGTCRMI CD PYT  
AAPGGEPGAKAQPPGPSTAALEVMQDL SANPPPF IQGPKGDPGRPGKPGPRGPPGEPGPPGPRGPPGPK  
GDSGRPLPGLQLTAGTASGVGVVGGGAGVGGDSEGEVTSALSATFSGPKIAFYVGLKSPHEGYEVLKFD  
VVTNLGNHYDPTTGKFCQVRGIYFFTYHILMRGGDTSMWADLCKNGQVRASAI AQDADQNYDYASNSV  
LHLD SGDEVYVKLDGGKAHGGNNNKYSTFSGFLLYPD

AUG initiation = 29.5 kDa  
ACG initiation = 33.0 kDa

+++++

## #12

### NM\_000314

CUG initiation conserved in mammals

#### PTEN phosphatase and tensin homolog

Synonyms: BZS; DEC; MHAM; TEPI; MMAC1; PTEN1; 10q23del; MGC11227;

#### PTEN

CCTCCCCTCGCCCGGCGCGGTCCCGTCCGCTCTCGCTCGCCTCCCGCCTCCCCTCGGTCTTCCGAGGCGC  
CCGGGCTCCCGGCGCGGCGGGGCGGAGGGGGCGGGCAGGCCGGCGGGCGGTGATGTGGCGGGACTCTTTATGC  
GCTGCGGCAGGATACGCGCTCGGCGCTGGGACGCGACTGCGCTCAGTTCTCTCCTCTCGGAAGCTGCAGCC  
ATGATGGAAGTTTGTAGAGTTGAGCCGCTGTGAGGCGAGGCCGGGCTCAGGCGAGGGAGATGAGAGACGGCG  
GCGGCCGCGGCCGGAGCCCTCTCAGCGCCTGTGACGAGCCGCGGGGCGAGCGCCCTCGGGGAGCCGGCC  
GGCCTGCGGCGGGCGGCGGCGGCTTTCTCGCTCCTCTTCTTCTTCTTCTAACCCTGCAGCCTCTTCTCCT  
CGGTTCTCCTGAAAGGGAAGGTGGAAGCCGTGGGCTCGGGCGGGAGCCGGCTGAGGCGCGGCGGGCGG  
CGGCACCTCCCGCTCCTGAGCGGGGGGAGAAGCGGCGGCGGCGGCGGCGGCGGCGGCTGCAGCTCCAGG  
GAGGGGTCTGAGTCGCTGTACCATTTCCAGGGCTGGGAACGCCGAGAGTTGGTCTCTCCCCTTCTAC  
TGCCTCCAACACGGCGGCGGCGGCGGCGGCACATCCAGGGACCCGGGCGGTTTTAAACCTCCCGTCCGCC  
GCCGCCGACCCCCCGTGGCCCGGCTCCGGAGGCCGCGGCGGAGGCAGCCGTTCCGAGGATTATTCTGTC  
TTCTCCCCATTCCGCTGCCGCGCTGCCAGGCCTCTGGCTGCTGAGGAGAAGCAGGCCAGTCGCTGCAAC  
CATCCAGCAGCCGCGCAGCAGCCATTACCCGGCTGCGGTCCAGAGCCAAGCGGCGGCGAGCGAGGGGCA  
TCAGCTACCGCCAAGTCCAGAGCCATTTCCATCCTGCAGAAGAAGCCCCGCCACCAGCAGCTTCTGCCATC  
TCTCTCCTCTTTTTCTTTCAGCCACAGGCTCCAGACATGACAGCCATCATCAAAGAGATCGTTAGCAGAA  
ACAAAAGGAGATATCAAGAGGATGGATTGCAGTTAGACTTGACCTATATTTATCAAACATTATTGCTATG  
GGATTTCTGCAGAAAGACTTGAAGGCGTATACAGGAACAATATTGATGATGTAGTAAGTTTTTGGATT  
AAAGCATAAAAACCATTAAGATATAAATCTTTGTGCTGAAAGACATTATGACACCGCCAAATTTAATT  
GCAGAGTTGCACAATATCCTTTTGAAGACCATAACCCACCACAGCTAGAATTATCAAACCTTTTGTGAA  
GATCTTGACCAATGGCTAAGTGAAGATGACAATCATGTTGCAGCAATTCAGTGTAAAGCTGGAAAGGGACG  
AACTGGTGTAAATGATATGTGCATATTTATTACATCGGGGCAAATTTTTAAAGGCACAAGAGGCCCTAGATT  
TCTATGGGGAAGTAAGGACCAGAGACAAAAAGGGAGTAATTTCCAGTCAGAGGCGCTATGTGTATTAT  
TATAGCTACCTGTTAAAGAATCATCTGGATTATAGACCAGTGGCACTGTTGTTTACAAGATGATGTTTGA

AACTATTCCAATGTTTCAGTGGCGGAACTTGCAATCCTCAGTTTTGTGGTCTGCCAGCTAAAGGTGAAGATAT  
ATTCCTCCAATTCCAGGACCCACACGACGGGAAGACAAGTTTCATGTACTTTGAGTTCCCTCAGCCGTTACCT  
GTGTGTGGTGTATATCAAAGTAGAGTTCTTCCACAAACAGAACAAGATGCTAAAAAAGGACAAAATGTTTTCA  
CTTTTGGGTAAATACATTCTTCATACCAGGACCAGAGGAAACCTCAGAAAAAGTAGAAAATGGAAGTCTAT  
GTGATCAAGAAATCGATAGCATTTCAGATATAGAGCGTGCAGATAATGACAAGGAATATCTAGTACTTACT  
TTAACAAAAATGATCTTGACAAAGCAAATAAAGACAAAGCCAACCGATACTTTTTCTCCAAATTTAAGGT  
GAAGCTGTACTTCACAAAAACAGTAGAGGAGCCGTCAAATCCAGAGGCTAGCAGTTCAACTTCTGTAAACAC  
CAGATGTTAGTGACAATGAACCTGATCATTATAGATATTTCTGACACCACTGACTCTGATCCAGAGAATGAA  
CCTTTTGATGAAGATCAGCATAACAAAATTACAAAAGTCTGAATTTTTTTTTATCAAGAGGGATAAAAACAC  
CATGAAAAATAAACTTGAATAAACTGAAAACTGGACCTTTTTTTTTTTAATGGCAATAGGCATTTGTGTGAGA  
TTACCAGTTATAGGAACAATTCTCTTTTCCAGCAACTCTGTTTTTACCCTATACATCCACAGGGTTTTGA  
CACTTGTGTCCAGTTGAAAAAAGGTTGTGTAGCTGTGTATATACCTTTTTGTGTCAAAGGACAT  
TTAAAATTCAAATTAGGATTAATAAAGATGGCACTTTCCCGTTTTATTCCAGTTTTATAAAAAAGTGGAGACA  
GACTGATGTGTATACGTAGGAATTTTTTCTTTTGTGTTCTGTCCAACTGAAGTGGCTAAAGAGCTTTG  
TGATATACTGGTTCACATCCTACCCCTTTGCACTTGTGGCAACAGATAAGTTTTGCAGTTGGCTAAGAGAGG  
TTTCCGAAGGGTTTTGCTACATTCTAATGCATGTATTCCGGTTAGGGGAATGGAGGGAATGCTCAGAAAGG  
AAATAATTTTATGCTGGACTCTGGACCATATACCATCTCCAGCTATTTACACACACCTTTCTTTAGCATGC  
TACAGTTATTAATCTGGACATTTCGAGGAATTGGCCGCTGTCACTGCTTGTGTTTGCGCATTTTTTTTTAA  
AGCATATTGGTGTCTAGAAAAGGCAGCTAAAGGAAGTGAATCTGTATTGGGTACAGGAATGAACCTTCTGC  
AACATCTTAAGATCCACAAATGAAGGGATATAAAAAATAATGTGCATAGGTAAGAAACACAGCAACAATGACT  
TAACCATATAAATGTGGAGGCTATCAACAAAGAATGGGCTTGAACATTATAAAAAATTGACAATGATTTAT  
TAAATATGTTTTCTCAATTGTAACGACTTCTCCATCTCCTGTGTAATCAAGGCCAGTGTAAAATTCAGAT  
GCTGTTAGTACCTACATCAGTCAACAACCTTACACTTATTTTTACTAGTTTTCAATCATAATACCTGCTGTGG  
ATGCTTCATGTGCTGCCTGCAAGCTTCTTTTTTCTCATTAAATATAAAATATTTTTGTAATGCTGCACAGAA  
ATTTTCAATTTGAGATTCTACAGTAAGCGTTTTTTTTCTTTGAAGATTTATGATGCACCTTATTCATAGCT  
GTCAGCCGTTCCACCCTTTGACCTTACACATTCTATTACAATGAATTTTGCAGTTTTGCACATTTTTTAA  
ATGTCATTAAGTGTAGGGAATTTTACTTGAATACTGAATACATATAATGTTTATATTA AAAAGGACATTT  
GTGTTAAAAAGGAAATTAGAGTTGCAGTAACTTTCAATGCTGCACACAAAAAAGACATTTGATTTTTT  
AGTAGAAATGTCCTACATGTGCTTTATTGATTTGCTATTGAAAGAATAGGGTTTTTTTTTTTTTTTTTT  
TTTTTTTTTAAATGTGCAGTGTGAATCATTCTTCATAGTCTCCCCGAGTTGGGACTAGGGCTTCAA  
TTTCACCTTCTAAAAAAAATCATCATATATTTGATATGCCAGACTGCATACGATTTAAGCGGAGTACAA  
CTACTATTGTAAAGCTAATGTGAAGATATTATTA AAAAGGTTTTTTTTTCCAGAAATTTGGTGTCTTCAA  
TTATACCTTTCACCTTGACATTTGAATATCCAGCCATTTTTGTTTTCTTAATGGTATAAAAATTCATTTTTCAAT  
AACTTATTGGTGTGAAATTTGTTCACTAGCTGTGGTCTGACCTAGTTAATTTACAAATACAGATTGAATAG  
GACCTACTAGAGCAGCATTTATAGAGTTTGTAGGCAAATAGATTAGGCAGAACTTCATCTAAAATATTCTT  
AGTAAATAATGTTGACACGTTTTCCATACCTTGTGAGTTTCATTCAACAATTTTTAAATTTTTAACAAAGC  
TCTTAGGATTTACACATTTATATTTAAACATTGATATATAGAGTATTGATTGATTGCTCATAAGTTAAAT  
GGTAAAGTTAGAGACAACCTATTCTAACACCTCACCATTGAAATTTATATGCCACCTTGTCTTTCATAAAAG  
CTGAAATTTGTTACCTAAAATGAAAATCAACTTCATGTTTTGAAGATAGTTATAAATATTGTTCTTTGTTA  
CAATTTCCGGCACCAGCATATTA AACGTAACCTTTATTGTTCCAATATGTAACATGGAGGGCCAGGTCTATA  
ATAATGACATTATAATGGGCTTTTGCAGTGTATTATTTTTCTTTTGAATGTGAAGGTCTGAATGAGGGT  
TTTGATTTTTGAATGTTTTCAATGTTTTTGAAGCCTTGTCTTACATTTTTATGGTGTAGTCAATGGAAATGGA  
AAAATGGCATTATATATATATATATAAATATATATTATACATACTCTCCTTACTTTATTTTCAGTTACC  
ATCCCCATAGAATTTGACAAGAATTGCTATGACTGAAAGTTTTTCGAGTCTAATTA AAACTTTATTTATG  
GCAGTATTCATAATTAGCCTGAAATGCATTCTGTAGGTAATCTCTGAGTTTTCTGGAATATTTTTCTTAGACT  
TTTTGGATGTGCAGCAGCTTACATGTCTGAAGTTACTTGAAGGCATCACTTTTAAGAAAGCTTACAGTTGG  
GCCCCTGTACCATCCCAAGTCTTTGTAGCTCCTCTTGAACATGTTTGCACACTTTTTAAAAGGGTAGTTGA  
ATAAATAGCATCACCATTCTTTGCTGTGGCACAGGTTATAAACTTAAGTGGAGTTTACC GG CAGCATCAA  
TGTTTTCAGCTTTAAAAAATAAAGTAGGGTACAAGTTAATGTTTAGTTCTAGAAAATTTTGTGCAATATGT  
TCATAACGATGGCTGTGGTTGCCACAAAGTGCCTCGTTTTACCTTTAAATACTGTTAATGTGTGCATGCATGC  
AGATGGAAGGGGTGGAACCTGTGCACTAAAGTGGGGGCTTTAACTGTAGTATTTGGCAGAGTTGCCTTCTAC  
CTGCCAGTTCAAAGTTCAACCTGTTTTCATATAGAATATATATACTAAAAAATTTTCAGTCTGTTAAACAG  
CCTTACTCTGATTGAGCCTCTTCAGATACTCTTGTGCTGTGCAGCAGTGGCTCTGTGTGTAATGCTATGC  
ACTGAGGATACACAAAAATACCAATATGATGTGTACAGGATAATGCCTCATCCAATCAGATGTCCATTTG  
TTATTGTGTTTTGTTAAACAACCCTTTATCTCTTAGTGTATAAACTCCACTTAAAACTGATTAAGTCTCAT  
TCTTGTCAAAAAAAAAAAAAAAAAAAAAAAAAAAAA

LERGGEEAAAAAAAAAAPGRGSESPVTISRAGNAGELVSPLLLPTTRRRRRRIQGPGPVLNLPASAAAAPP  
VARAPEAAGGSRSEYSSSPHSAAAAARPLAAEEKQAQSLQPSSRRSSHYPAAVQSQAAAERGASATAK  
SRAISILQKKPRHQQLLPSLSSFFFSHRLPDMTAI I KEIVSRNKRRYQEDGFDLDTLYIYPNI IAMGFPAE  
RLEGVYRNNIDDVRFLLDSKHKNHYKIYNLCAERHYDTAKFNCRVAQYPFEDHNPPQLELIKPFCELDLQW  
LSEDDNHVAAIHCKAGKGRGTGVMICAYLLHRGKFLKAQEALDFYGEVTRDKKGVTI PSQRRYVYYSYLL  
KNHLDYRPVALLFHKMMFETIPMFSGGTCNPQFVVCQLKVKIYSSNSGPTRRREDKFMFYFEPQPLPVCEDI  
KVEFFHKQNKMLKKDKMFHFWVNTFFIPGPEETSEKVENGLCDQEIDSICSIERADNDKEYLVLTTLTKND  
LDKANKDKANRYFSPNFKVKLYFTKTVEEPSNPEASSSTSVTPDVSDNEPDHYRYSDTTSDPENEPFDED  
QHTQITKV

AUG initiation = 47.2 kDa  
CUG initiation = 64.9 kDa

+++++

## #12

### NM\_139239

CUG initiation conserved in mammals.

**NFKBID nuclear factor of kappa light polypeptide gene enhancer in B-cells inhibitor, delta**

Synonyms: MGC11314; TA-NFKBH; IkappaBNS; MGC149503; NFKBID

TTCCGCCGAGCGCGACCCGGGGACTCCCAGGCCTGTGGGCGGGCCCTGCCCAGGACTGGGCGGTGCCATAA  
CCCCTAGTTTAAAAACTCGCGGGTACCGGACCCAAGATCGGGGACCCGGCGGGCTCCGCGGGGAAACA  
GCGAGGCTGGCGCAGCGCCGAGGCCCGCGCCCTGGGGGCCCAATCCACGCCAGGAATCCCCGAGTGAG  
CAGGGGTGAGCGCAGCCACTGCCAACGCAAACCGTGAAGAAGCTTCTGGAAGAGCAGAGGCCCGCCAGC  
AGCAGCAGCCCGACGCTGGCGGGGTGCAGGGACAATTTCTCCCTCCCCAGAGCAGCCCCTGACCCCATCT  
GTGAATGAGGCTGTGACTGGCCACCCTCCCTTCCCAGCACACTCGGAGACTGTGGGTTCTGGACCTAGCAG  
CCTGGGCTTTCCAGACTGGGACCCCAACACGCAATGCTGCCTACACTGACAGCCCCTACTCTTGCCCTGCTT  
CTGCTGCCGAAAATTTCTGCTCCTGACTTCTACCCACCCTCGGACCCAGGGCAGCCGTGCCCATTTCCC  
CAGGGCATGGAGGCTGGACCCTGGAGAGTTTCTGCACCCCTTCCAGGACCCCAACAGTTCCCCGCTGTGGT  
CCCTGGACCATCGCTGGAGGTGGCCCGAGCTCACATGCTGGCTTTGGGGCCACAGCAGCTGCTGGCCAGG  
ATGAGGAGGGGGACACGCTCCTTACCTGTTTGCAGGCTCGGGGGCTGCGCTGGGCGGCATATGCTGCGGCT  
GAGGTGCTCCAGGTGTACCGGCGTCTTGACATTCGTGAGCATAAGGGCAAGACCCCTCTCCTGGTGGCGGC  
TGCTGCCAACCCAGCCCTGATTGTGGAGGATCTGTTGAACCTGGGAGCAGAGCCCAATGCCGCTGACCATC  
AGGGACGTTCCGGTCTTGACAGTGGCCGCTACCTACGGGCTCCCAGGAGTTCTCTTGGCTGTGCTTAACTCT  
GGGGTCCAGGTTGACCTGGAAGCCAGAGACTTCGAGGGCCTCACCCCGCTCCACACGGCCATCCTGGCCCT  
TAACGTTGCTATGCGCCCTTCCGACCTCTGTCCCCGGGTGCTGAGCACACAGGCCCGAGACAGGCTGGATT  
GTGTCCACATGTTGCTGCAAATGGGTGCTAATCACACCAGCCAGGAGATCAAGAGCAACAAGACAGTTCTG  
CACTTGGCCGTGCAGGCTGCCAACCCCACTCTGGTTTACGCTGCTGCTGGAGCTGCCCCGGGGAGACCTGCG  
GACCTTTGTCAACATGAAGGCCACGGGAACACAGCCCTCCACATGGCGGCTGCCCTGCCCCCTGGGCCGG  
CCCAGGAGGCCATCGTGCGGCACCTGTTGGCAGCTGGGGCGGACCCCAACTGCGCAACCTGGAGAATGAG  
CAGCCCGTTACCTGCTGCGGCCCGGGCCGGCCCTGAGGGGCTCCGGCAGCTGTTGAAGAGGAGCCGTGT  
GGCGCCCGCAGGCTGTCTCTTAGGACTCAAACCCAGACCCCTGGACTGATTTTCCAGTCCCCACCGTCTCT  
GCGGGACAGCCAGCGTATGCTAATGTTGCAAACCCATGATAATGTATGTGAATATCCTGCCATTGGGGTT  
TTACATTAATAAACCAGAAATGGCTGCAGAGGGGTGAACAGGCCCAATATTTGGGGTCTGTGATAACCCT  
CTTCTACCCACAAGGAGCCCTCTTGATGATTTCTGTGAAATCGAGGCCCTTGATTGTTTCTGTGAAACAC  
CCTGCACCCTAGTCCTTTCCCACTGAGATCTTTCCGGTCTCTCCCTAACTCAGT

LAQRRGRGPGGPQSTPRNPRVSRGERSHCPTQTVKLLLEEQRRRQQQPDAGGVQGFLLPPEQPLTPSVN  
EAVTGHPPFPAHSETVSGPSSLGFDPDWPNTAAAYTDSPLYSCPASAAENFLPPDFYPPSDPGQPCFPQ  
MEAGPWRVSAAPSGPPQFPAVVPGPSLEVARAHMLALGPQQLLAQDEEGDTLLHLFAARGLRWAAYAAAEV  
LQVYRRLDIREHKGTPLLVAANQPLIVEDLLNLGAEPNAADHQGRSVLHVAATYGLPGVLLAVLNSGV  
QVDLEARDFEGLTPLHTAILALNVAMRPSDLCPVRLSTQARDRLDCVHMLLQMGANHTSQEIKSNKTVLHL

AVQAANPTLVQLLLELPRGDLRFTVNMKAHGNTALHMAAALPPGPAQEAIVRHLLAAGADPTLRNLENEQP  
VHLLRPGPGPEGLRQLLKRSRVAPPGLSS

AUG initiation = 33.5 kDa  
CUG initiation = 48.7 kDa

+++++

## #14

### NM\_001015072

Extension conserved from human to fish but non-AUG initiation is conserved only in mammals. In the second human paralogs, UFSP2, the extension is conserved but is initiated by AUG codon and is part of a larger extension. In-frame AUG codon exists in mouse, Norwegian rat, kangaroo rat and dog upstream of the CUG.

#### UFSP1 UFM1-specific peptidase 1 (non-functional)

(the “non-functional” designation is apparently based on the fact that it is missing the conserved N-terminal domain of the protein but it is actually there if one starts from the first or second CUG)

Synonyms: UFSP; UFSP1

AGCATTGTGGGAGCTCCTCGGTCCGGTGCCGGTCCGGTGGCTGCCTATTGCGGCCTGCGGTGATCAACGAGGC  
CCGGGGAGCGCGTCCCCAGTCTGCGCGCCGGTCTGCGGCAGCTGGCCCAAGACCCGAGCCGAAAGGAAG  
TGTTGGAGCCTGAGGTGCCTCCGCGCCGCTAGGAGGACGCTGTGCCTGGCCTGGGACCTCCGCTCCCGCC  
ACCGCCCTGGAGCCGCTGAGGGACGTCCACGTGGGCCTGTCCCGCCGAGCCGCGGCCCTGTCCGCTGGC  
GCTGCTCTCGGGCCACTACCTCTACTACCACTACGGCTGCGACGGCCTGGACGACCGCGGCTGGGGCTGCG  
GCTACCGCACTCTGCAGACGCTGTGCTCGTGGCCAGAGGGCCAGCCCGCGGGCGTACCTGGACTGGCCGCC  
GTACAGGCGGCCCTGGAGGACATGGGCGACAAGCCCCCGGCTTCCGGGGCTCCCGGGACTGGATCGGCTG  
CGTGGAGGCCAGCCTCTGCCTCGCTCACTTCGGAGGGCCCCAGGGACGCCTCTGCCACGTACCCCGGGGAG  
TGGGGCTGCACGGGGAGCTGGAGAGGCTTTACTCGCACTTCGCAGGGGGTGGGGGCCAGTCATGGTTGGG  
GGGACGCAGATGCCAGGTCCAAGGCCTTGCTGGGAGTCTGCGTAGGGTCAGGCACGGAAGCCTATGTCCT  
GGTATTGGACCCTCACTACTGGGGCACTCCAAAAAGCCCCAGTGAACACTACAGGCTGCTGGGTGGGTGGGCT  
GGCAAGAGGTGAGTGCAGCCTTTGACCCCAACTCCTTCTACAACCTGTGCTTGACCAGCCTTAGCTCCCAA  
CAGCAGCAGCGCACCTTGGACTGAGGACGAAGTTACAGAAGTACAGATTCTCGGGTCCAGACACGCACCTA  
TGTACCTCCCACTGGTGTCCCTGCAAAGCCTGGCGCTTTTGGACATCAATAATAAAAGTGGCAGGGCTGAGC  
AAAAAAAAAAAAAAAAAAAAA

LEPLRDVHVGLSPPSRGPVRLALLSGHYLYYHYGCDGLDDRGWGCGYRTLQTLCSWPEGQPAGVPLAAVQ  
AALEDMDGDKPPGFRGRSDWIGVEASLCLAHFGGPGQRLCHVPRGVGLHGELERLYSHFAGGGPVMVGGD  
ADARSKALLGVCVGSGETEAYVLVLDPHYWGTPKSPSELQAAGWVGWQEVSAAFDPNSFYNLCLTSLSSQQQ  
QRTLD

AUG initiation = 15.0 kDa  
ACG initiation = 23.2 kDa

+++++

## #15

### NM\_020153

AUA initiated extension in mammals, AUG initiated in other vertebrates  
C11orf60 chromosome 11 open reading frame 60

Synonyms: IFT46; C11orf2; FLJ21827; C11orf60

GTGACTCCTTGATCTTCTTCTGCGTGGAGAGCCTTCGCGGGTGAGGCTTAACGCGCAGGAGGTCTCACGA  
GAGTGGGAAGCAACTCTCGCGAATTTTAAAATTTATCTTTTTGCCTAGCGACTGACAACAGGCTGGTTGCTT  
GGCGTGGAATCCTAAAGTGGCCTGGCTTTGAGACTGGAGTGAGACCCAGCCCTAGGCTGGGGTTCTTTCC  
ATTATAGAGGAGACGGATTGAGAAGGGCTACAGACCAAGGTTGTTGAAAACCAAACATATGATGAGCGTCT  
AGAGATTAACGACTCCGAAGAGGTTGCAAGTATTTATACTCCAACCCCAAGACACCAAGGACTTCCTCGTT  
CTGCCCATCTTCTAACAAGGCTATGGCTGATAACAGCAGTGATGAGTATGAAGAGGAAAATAGCAAGGTC  
CTAAGGGAGGGCATGCCACAGGCTCCAGGCCACAGAGGCCAAAGACATGGACCCTGTTCCACCTGCCCTGC  
AAGTCTCAAGTGCCACCAGACCCCTTCTCATGTACTTGAGAGGGTGGGATGGTACAGAGAGAGCCAGAAGC  
ACAGAAAGGAGAAGAAGGAGACCTCACAGTTGACACCTCAACGGGGCTTTAGTAAAATGAGGATGACGAT  
GATGATGATGATGATTTCATCTGAAACTGATTCTGATTCTGATGATGATGATGAAGAGCATGGAGCCCCCTCT  
GGAAGGGGCCTATGACCCTGCAGACTATGAGCATTGCGCAGTTTCTGCTGAAATTAAGGAACTCTTCCAGT  
ACATCAGTAGGTACACACCTCAGTTGATTGACCTGGACCACAACTGAAGCCTTTCATTCCCTGATTTTATC  
CCAGTGTGGGGATATTGATGCATTCTTAAAGTCCCACGTCCTGATGGAAAGCCTGACAACCTTGGCCT  
ATTGGTATTGGATGAACCTTCTACAAGCAGTCAGACCTACGGTGCTCTCACTCTGGTTAACAGAGAATT  
CTAAGCAGCAACATCACACAACATATGAAAGTAAAAGCCTAGAAGATGCAGAAAAGAATCCCAAAGCC  
ATTGACACGTGGATTGAGAGCATCTCTGAATTACACCGTTCTAAGCCCCCTGCGACTGTGCACTACACCAG  
GCCCATGCCCGACATTGACACGCTGATGCAGGAATGGTCCCCGGAGTTTGAAGAGCTTTTGGGCAAGGTAA  
GCCTGCCCACGGCAGAGATTGATTGCAGCCTGGCAGAGTACATTGACATGATCTGTGCCATTCTAGACATC  
CCTGTCTACAAGAGTCGGATCCAGTCCCTCCATCTGCTCTTTTCCCTCTACTCAGAATTCAGAAGCTCACA  
GCATTTTAAAGCTCTCGCTGAAGGCAAGAAAGCATTCACTCCTTCATCCAATTCCACCTCCCAAGCTGGAG  
ACATGGAGACATTAACCTTCAGCTGAGACTTCCCAAGCTGCTGTTTCAAGGCTGAGCTGGCCCCCTCTGC  
CCCAGCTGAGATGGACAGATCGTTGTCAGCTACTTGATGTCCTTGCCCATGCCACAGCTTGGCTCAGGGGC  
AGTGCATGTCCTGCTGCCCTCTCTGCCAGAGGGCACAGAACATGTTTGTGTTAATGAACCTGCCTGCCTCAG  
ATTGCTGTCCCCGGGGAGTTAATGCATCTACACCCTGTGGGGATTTGAGTTATAAGAATTGGAATTTCTG  
AGATCCCATGGAGTTAGATTGGGAGGAAAGCTTAAAAGATGTCCTTTTTTGTGAGAGGGATGGAATTTGTT  
TCTTTTCATTCGTAAGTTAGTGAGTAAAGATTTTATAAATCAAAAAAAAAAAAAAAAAAAAAA

IEETDSEGLQTKVVENQTYDERLEINDSEEVASIYTPTPRHQGLPRSAHLPNKAMADNSSDEYEEENSKVL  
REGMPQAPGHRGKMDMPVPPAPASLKKCHQTPSHVLERVGVYRESQKHKRKEKKETSQSLTPQRFSENEDEDD  
DDDDSSSETSDSDDDDEEHGAPLEGAYDPADYEHLPVSAEIKELFQYISRYTPQLIDLHKLKPFIPDFIP  
AVGDIDAFLLKVPKPDGKPDNLGLLVLEPSTKQSDPTVLSLWLTENSKQHNITQHMVKVSLLEDAEKNPKAI  
DTWIESISELHRSKPPATVHYTRPMPDIDTLMQEWSPFEFELLGKVSLEPTAEIDCSLAEYIDMICAILDIP  
VYKSRIQSLHLLFLSLYSEFKNSQHFKALAEKKAFTPSSNSTSQAGDMETLTFS

AUG initiation = 40.0 kDa  
AUA initiation = 46.2 kDa

+++++

# #16

## NM\_001005404

ACG initiated extension conserved in vertebrates

### YPEL2 yippee-like 2 (Drosophila)

Synonyms: FKSG4; DKFZp761C2021; YPEL2

GCCGCGGCGGTGGCGGAGACTGTGGCTTTAAGAGCGTGCCGGGAGCCCGAGCCCCAGCCGGGCCGCGCTTC  
GCCGCTGCGCACCCAGCGGAGCCAAGCCCCACGCTGGCCGGACAGGGCCGCTGTGCGCGGGCTGCTGAG  
AACCAGCCCTAGACCTCTGCGTGAAGGTTCTTCTGCCGAAGACATCACCAGTGTGTGGAGCCTGCCACACC  
CACCCGCTGCCAAACCACGGCCTTTACCTGTGTCTTCCGGTGTTTTCCCGTGCGACCCATCTGTGGGAGTG  
CCTCGTGGGCTGCCCCAGAGTTACCCCCACACTCAGCAGCACCAATGGTGAAGATGACAAGATCGAAGACT  
TTCCAGGCATATCTGCCCTCCTGCCACCGGACCTACAGCTGCATTCACTGCAGAGCTCACTTGGCCAATCA  
TGATGAACTAATTTCCAAGTCATTCCAAGGAAGTCAAGGACGAGCATACTCTTTAACTCAGTAGTTAATG  
TGGGCTGTGGGCTGCAGAAGAGCGAGTGTGCTAACAGGACTGCATGCAGTCGCAGACATTTACTGTGAA  
AACTGCAAAACCACTCTGGGCTGGAAATACGAACATGCTTTTGAAGCAGCCAGAAATATAAAGAAGGCAA

ATACATCATTGAACTAGCACACATGATCAAGGACAATGGCTGGGACTGATTGGACAGCATCTACCCAACCC  
AGTGTCCACGTGAACGCCATTCAACCGAACATTCTTCCCAAGCGTGAGAGAGTACTGACACTTGGTTCCA  
TCCATTTAGGGGCCTTGCCATCCGGGGCATCCTCCCACCCTGACGCCATCTTTCTGGTGACCGGCCTCTAA  
ATCGCTGTCTCTGTCTCTTTGCTTTGTATCTGTTTGTGAGTTGATCCTGGCTTCTCTCTCTGTTCTAGT  
TTTGGCTGAAAACAAAACAACAAAAGGAACAGATCCTTGACCGCATGGCGGCAGCCCACCTTGGTAAGGGC  
CCCAGGGCCCATGCGAGAGCTGCCTGATGGCCTCTTGTGAGGAGAGCAGTGGCACGGGGGCGTGAGGAAGA  
GGGAAAGGGGAAACTCTAAGGGTCTTGGCGCGGGGAAGGGGTGGAAGGGTGGAGGTAGGAACAAAATTGCG  
CCGCTCCTGGAGACCTGATAACTTAGGCTTGAATAAATTGACTTGTCTAAAAGGACAAAGAGAAAAAAAAA  
ATACCTCATGACTGCATTCTCTGACTAGAAAGCTTCTGTTCTGACACCAAATGTGCCAGGTTAGCAAAT  
GAGCAACAAGATGTGGCCCTGATTCTAGTTGGTGGGGCAAGGGCCTGGTTCTCCTGGGCTGAGTGGGGGAGT  
GTCCTGGCAGCAGCAGTGGCCAGTGGCCAGTGGCCAGGTGGGTGCGATGACTCTGATGCCTCACTCAGTCTC  
TGGGCAATCATCATCTTTGCTCTAGCCACCCTAGATAAGGTGTGAAGGGACTGCTGTTTGCAATGGGCTT  
ACCATCCAAATATCCCAAAGGCTTTGACCAGCAACCAAGTAAAATCAGTAATTGAGGAGAGCAGGGCACAA  
AGGGGCTGCAGTTTGGGAGCTCCTGAAGAAATGGCTCAGATATTGAGTCAGAGAAATAAAAAGTAGGATCA  
GTTAGCAATTCTAACTGCCCTTCTTCTGACCCCTCATAAGAGGAGTGTGGTGAGGGAGGGGACTGGGTAG  
GGGTATCCCAGGAGGAGGGGTTTACATTGGAACCAGTTCAGGTTCCGGTGCATCTTCTCTTCCGTTTTTA  
CAGTGGCTTCCGTGGGATCGTCAATTTCTTGTCTTAGAGTTTTCCGGTGTTTTTTCTCCAGTCTTGTACTG  
TAGACTGTAGAAAGCACGGGCCCCAGGCTCTGAGCTTAGTAATAACCTGGCTGGTAGATTCTCATGCCCC  
TAATTGTCCCCTTAGGCTGAATGTCTTGCATGGAGAGAAATCTCCTGTGAGTGTGGTCCAGCAGCAGGG  
AGGAGTTCTGCCCAAATCCGATATCACCCCTTCCCCATCCAAGCATCCTTCGATTAGGGAAGTGGAGAG  
CACATCCCTGTAAGGCCATAAGAGAAAGAGGAGTTTTGTTACATTTAATCAACACTGTGAAGTCTGTTCTA  
CAGCAATTGAGCCATTACACAGTATATGACTGAAACTCATTTAACTGGGTTAATTTCAATTTCTTAGACTGA  
ATATATTATTGTTAAGATACGTGTGCGTGTAGGTAATTTCTCAGCATCTCCTCCAAGTAGGCCGACCTTCT  
CGGAAAATTCACCCTAAAAGTCTCACAAAAGAATGAGTTTATGGGGAGATTCTGTAAAGTGAAGTGAAGTGA  
ATGAAAGCAGCCAACAGCCAGGAGCTTTTCCAGAAATAGCGTCTGCAGCAGAACCAGTTTTCCATTGAGAGCG  
CGTCTTGGTGGAAATGCTTTTTTGTGTGTCTCCACGCGCTGATGGTGGAAATGGGAGCCCCAAGACGTGTG  
GGCTTAGAAATCAACTTTTTGTTCCCAAGGCTTCTTGTCCAGATCTTCCAGTGTCTTCCATAGCCCTGGGA  
GATCAAGTTGTTCTCCCCACTTTACTGCAAGGTAGACTGAAGTTTCCAGAAATACTGAATTTCTGTCTCC  
AGAAGAATAGTTTTCTCTGGCTCACAGGCCAAAGTTCTCAATGAAATCGTTTTTTTAACTTTACATTTCTTAA  
GCTGGCTTCCCGGCAGAGAAGCCATGGATTTCCCTCTCTCCCTTCCCCCTCCTCAAGGAAATAGTCTTCC  
TTTTATGGATTTTCAATGGACTCTTCTCAGCGATTGTCTGGCTGTTTATTGATAGTCTTCCATAAGA  
AAATGGGGTTAAACATGGGGTAGGTATTTTGTCTTTCAAACACAAATGGAATGTGGTGACATAAACTAGA  
CATGGGGTGCCCTCAAGTTTTCCAAGGGACCAATGTGCCACTGTTCTTCTTGGGGATGAGGCCTTTGACT  
GTTGGATGGATCAGAGCAGGCTCCAGTCAGACCCTGGTTCTGAATGTTTTTTTTTTTCCGGTACTATCCAGT  
GAGCCTTCCAGTGGGTGCAAGGCGCCATACTTGTGTGAGAGAGCTGAGTAGAGTGTGGTTTTTCCATAAC  
TACAGGGGGAAAAAAGTCAATTAGGCTTTCCCTTTGTGTGAGTGAACCAAAAGTGTCTTACAAACGTTT  
GCTCTGTTTATGGGTTGTCTATCTAACATTGAGCAGCATTGGAGAGGCCACAGCTGAGCTATGGAGATGCT  
AAATTAACTCATGGCCTCAGTCAGTTTCAATTTTAAATTTCTCACCAAATTTATTGACTTAGAGCATAACCA  
AAGACCTCATTATTACCCAGGTGGGTTGGGGTAATTGGAGTTTGTGGTGAAGTTTGGGGGCGGGGTG  
TTGGGAGTAGAGACAGGGTAAGGGGACGTGAGAAAGGAAAAGGCATGAAGTTCTATACCTCAGCCAGCAGC  
TGCCTTCCGTTTGGAACTGAAGTCCAGCCAGCAGACTCTCTAGCTCCATCTCCCCTGTGCCACCCTAGGTCA  
TATGACCTTGGCCACCTTGGAGTAGACCCAGACCCCTCGGGACCCGGGACATTAGTCTCAGGCTGCTGATG  
GATTGATTTGACATGAACCAAAACACAGCCAAACTCGATACCCACAAGCTGTCAGCTGAACCTGACTGAGTG  
TTCTTCTGAGTTCACGAGGATAGGCTAGAGTGCATTTTTACTGGTGGATCAGTGTGTGCGAAAGAGATGA  
CCCTTTATAAAGAGATTTTTCAAGTGGATATATATAAAAAGAAACAGTTGCTTGTAAAATATACTTTTTGAAA  
TAATATTTAATTTTTTAAATAATATATTTGGTGTGTTTTCTCAGATCCCCTGAGAGCACTTTTTATTTTCT  
CTTTTAAATTTCTATGGTTTTCTTTGCAATTTCTTGAAGTATATTTTTAAGGGAAACAGTGCATACCAATACAT  
GTTTTAGTTTTTTTTTTTTTAAAGTCTCTATCACTTAACTGAGTCAAGGCTTTGAAGCAATGCCTCT  
CTGCATTTTTTCCCAGTGGAAACAGACTCTGCAGTACATTAATCAGGTTGAGAATTGAAATATTTTCTTGC  
ATCAGTATTGGCTAGAAAAGAAAATAAATAAAACCAAGTTAATTTAGTAGTAACAACCTTACAGTGATTCTT  
CCTGTTGGAAGAATTTCCAACAAATCAGAATCACGTTTTTGTGTTGTGCGTGTGCGCGCACACGTGTGTA  
AAGCACTTTCGATTGTGCCTCCTGTTTTCTCGAGTGGGGACACTTTAACTACAGTTTACACCTCGGGCGCA  
TAAAGTTTTTCTTCTTCTTCTCTGTTTGTGTTTCTGTTTCTGAGTGGACCAACAGCAGAACCACGAGGAT  
TTGTTTTGAGTATGGAGCTGTTGCGGGTTTGTCTCTTTTTTCTTGTCTTTCGCTGCTCAGTTTTTACAGACTG  
TAAAGGAGATGTGTTGTTTGTGAAGATGGAGCAGAGTCAAATCTGTGCTTCTAACTGAGATGAGAGTGTAT  
TAATCACGTATCGAGGGCTCCAGCTGTTTTAGAAAGCCACATCATGTTAAACATTAAGTGTGTTGATTAA  
AAGAACATTAATATTATAATACACATATCTTAGTGGTAAACAGCTTTTTTTTTTTTTTAAAGTGCAGATTGCCTC

AGGTTTAGAAAGAGGCTGAGAAATCAAATCTTGAACACAATCAACTTACATATTTTAAAGGAATCTGCCTC  
AAATGAGAAAATATGCTAGTTATCTAGATAGAGGAAAGAGATATTTACTTTTTTAAAAATTTAAATAGTTA  
TGAAATCTGGCAGAAAAGGTAAAGCCTAGAAGAACTATGAAAGCTATTCTCATGTTACCAAATTCTATCT  
GCGCATATGTTTTGTATAACATTTCCGGTGACAGTGGGAGTCGGTTCCCTTTCCCAACCTGCAGAGACTAT  
CTTCCAATACAGAATCTGTCTATTTATGCTTGTGTTTACAACTGTATTTGTTGGGTTTTGGGTTTTTGT  
TCTTTGGTGGCATTTTTTCAGGTCACTTTGCTTCTATAACAAAGGTAATTGTTTTCAAATAATTTGTCTTCA  
CCTTTTCCTGTATTTGTACATAGTGATTGATTAGAGAAAAGTGCATTGTTTCTGTATATTTCCAATC  
TGTGTTGGTGTCTATTTGAGAAAATAAAAGTTTTCAAATATTAATCTTAAAAA

TAFTCVFRFCPCDPSCGSASWAAPFETPHSAAPMVKMTRSKTFQAYLPSCHRITYSCIHCRAHLANHDELIS  
KSFQGSQGRAYLFNSVVNVGCGPAEERVLLTGLHAVADIYCENCKTTLGWKYEHAFAESSQKYKEGYIIEL  
AHMIKDNWD

PROBABILITY of export to mitochondria: 0.3792 with extension  
PROBABILITY of export to mitochondria: 0.4946 w/o extension

AUG initiation = 13.6 kDa  
ACG initiation = 17.0 kDa

+++++

## #17

### NM\_020335

AUA initiation conserved in vertebrates

VANGL2 vang-like 2 (van gogh, Drosophila)

Synonyms: LPP1; LTAP; STB1; STBM; STBM1; KIAA1215; MGC119403;  
MGC119404; VANGL2

GGATCCCAGTCTGATTCCTGATCCTTGATCCTTGATCCTTGGTCCCAGCATGGAGCCTGAGCGCCCCCT  
ATCCCCCCTGGCCCCCAGCCCCGGGGCCTTGAGGGGGAAGAGGCAGCGGTCTGGGACGGAGCAGGGGGT  
GACCAGACTCAAGAACCCCCCCTCAACATCCCCATCGCGCGCTGCCTGTCCAGGAGCGCCGAGTTCCG  
GAGCGACCCGGAGCGCTGCGGATACAAAGGCGACGGGCCGAGCGGGCGCCCGCGGAGCCACCCGGCAGT  
TCGCAGCGGGGAGCGTGCCTGATTTTTCTCTGAGACAAGCCACCCGTCCAGCAAAATAGAGTCCCTCA  
GGGTGACAGTTGACTTCTGAAGGTGCCTCTTGGCCTAAAGAAGCCGGTGCTGAAGGAGGTGGCTGTGGGG  
CCCCCAAGAGGCCCCAGCCTGCGGCCCTGGAGCGCTACAAGGCGCGCGTTTCAGACGCCATGGACACCGA  
GTCCCAGTACTCGGGCTATTCTACAAGTCCGGCCACTCCCAGCTCCCGCAAGCACAGGGACCGCCGGG  
ACCGACACCGCTCTAAGAGTGCAGATGGGGGCCGAGGGGACAAGTCCGGTGACAATCCAGGCTCCCGGGGAG  
CCCCTGCTGGACAATGAGTCCACACGAGGGGATGAGCGGGATGACAACCTGGGGGAAACGACGACAGTAGT  
AACGGGCACCTCAGAGCACAGCATCTCCATGATGACCTCACACGCATCGCCAAGGACATGGAGGACAGTG  
TCCCTCTGGACTGCTCCCGTACCTGGGTGTGGCAGCGGGGCCACCCTGGCACTGCTGTCTTTCCTCACG  
CCTCTGGCCTTCTGCTGCTGCCCCACTGCTGTGGCGGGAGGAGCTGGAGCCTTGCGGGACGGCCTGCGA  
GGGCCTCTTCTATCTGTGCTTCAAGCTGCTCATCCTGCTACTGGGCAGCTGGGCTCTGTTCTTCCGCC  
GGCCCAAGGCCTCGCTGCCCGCGTCTTTGTGCTGCGTGCCCTGCTTATGGTGCTGGTTTTCTGCTCGTG  
GTCTCCTACTGGCTCTTCTATGGTGTGCGCATCCTGGATGCTCGGGAGCGCAGCTACCAGGGCGTGGTGCA  
GTTCCGCCGTGTGCTGGTGGACGCCCTTCTTTTCGTGCACTACCTGGCCGTGGTCTGCTGGAGCTGCGCC  
AGCTCCAGCCTCAGTTCAGCTCAAGGTGCTGCGCTCCACCGACGGCGCCAGCCGCTTCTACAACGTTGGC  
CATCTCAGCATCCAGCGCGTGGCAGTGTGGATCCTGGAGAAGTATTACCATGACTTCCCTGTCTACAACCC  
TGCCCTCCTCAACCTGCCCAAGTCCGTCTGGCCAAGAAAGTGTCTGGCTTCAAGGTGTATTCCCTCGGAG  
AGGAAAACAGCACCAAACTCCACTGGCCAGTCTCGGGCTGTGATTGCAGCGGCAGCTCGGAGGGCCGGAC  
AACAGTCAACATGAGTACTACTATGAGGAGGTGACTGAGCGAAGGGTGCGCAAGAGGAGGAGGAGGAGGAGG  
TGAGTGGCGGTGGAGGAGGCCCTTCACTCACATTAAGCGGCTGCAGGAAGAGGAGCAGAAAAACCCAGGG  
AGGTGATGGACCCCGGGAGGCAGCCCAAGCCATCTTTGCATCCATGGCCCGTCCATGCAGAAGTACCTT  
CGGACCACCAAGCAGCAGCCCTACCACACCATGGAGAGCATCCTGCAGCACCTTGAATTCTGCATCACGCA

TGACATGACGCCCAAGGCCTTCTTGGAGCGATACTTGGCGGCTGGACCTACCATCCAGTACCACAAGGAAC  
GCTGGCTGGCCAAACAGTGGACATTGGTGAGCGAGGAGCCGGTGACCAACGGCCTCAAGGATGGCATCGTT  
TTCCTCTTAAAACGCCAGGACTTCAGCCTGGTGGT CAGCACCAAGAAGGTCCCATTCTTCAAACCTCTCCGA  
GGAATTTGTGGATCCCAAGT CACACAAGTTTTGT CATGAGGCTGCAGTCTGAGACCTCAGTGTGA CTGTGCA  
ACAGCAGGGGGAGTGGGAAACTCTGGGGGGTCTGAGGGGGTGGGAGGGGGCTTGGTTCTCAGGCCAGCC  
ACATTCCTGCCACCCTTCTTCTTCTTGGCTCTTTTTTTTTTACTTGAATTAACGCACCCCCACCTTCTCTCC  
TCGCTTCTTCTTATTTTACCCCATGTGAACCTGGAGAGACCATCCTGCTGTCAACAGTACCTGGGAAGGA  
CTCCCACCTCACCAACAACCTTTTGTATTACTCTAGGCCCTGCAGGAATCAGTGCCTCTCTCCCTCTTCTTT  
CCCTAGTCTTTTCCCAGATTACAGTCTCTCTGAAAGGGCACAGGGCCCTGCTGATTGTACTTTCCCCTCC  
TGAGCCCCGACTCACAAATCCAAGTTCTTAAAACATTTCTCTT CAGTGGCCCAACAGGGTTTTCTCTGGGGC  
ACATGGACACTGACTCCAGAGAGCCACAGTGCACAACTCTCAGGGCAGCAACTGGCCCTCTGTCCCTCA  
CCCCAGCCACAACAACCTGGGTTCTAGGGCAGGGATACTCCTGCCACACAGCCCCGAGTTAGAAATCTCC  
TTGCTAGGAGCATTGTCTCCACATATATTTAGAGCAAAGAAGGATCCCATCCTTTTTCCAGAAATCTCCA  
CCTAATGTTTTTGGTTTTGTATGGTCACGTGACCATAGGCAACCACGTGGAAACCCTCTGTGACCCTTTTC  
CAGGGACTTAGGGGAAGGTACCTTTCTTCCAATGTGTCTTCTTAGGCAGCCCCCTGAGGAGGAGGGCTGAAT  
AGATCCCTGAGGTTTTGGAGAGACCCCCATCACTGACTCCTGCTCCCTAACCTACCCTCACTTTCTGTCCT  
CGCTCTTCCCAGTGAAGGATGGTATGTAGACTCCTGTACAGACATAGTGGCTTGCAGACCCTGACCCAGCC  
CCTGTGGTCTTAGACAAATGTTTTTATTTTTGTACCAGCCACCCCTGTCTGCCGCCTTCTCTCGACTCC  
AGAGACCTGTTGCCTCATCTCTTTTGGGGAAGAGCCGGCAGCTCCTCCTCATCCCCTGCCTTAAGTCCAGT  
TCTTTGCCTCAGGGGTCTCGTTTCTTGGCCTTCCAGGGTCCCCACCCCTTTTCTCCCTGCCTGATTCTCT  
GAGCTCTGGGCTCCGTCTGTATTGGGTTGAGGGGAAGGATTACTGCCTTTTGTAGGTACTTCACCCCTCA  
CCCCATTTTAGCTTCCATAGTCTTTCACCAAATCCAAATCTTGATAATTTAGATCTCATTTT GAGCAAA  
ATTTGCTGGCCCTCTAATAAATATTTTTCAATATAAATCTGAGCCTTTGACTCAGACATTTTTGCCAAGGAG  
AGTAGAATTAGGAAGTACCCATATACATCCAGCCAGGATCCACATGGAGGACCTTTCTGATGGCTGCAATG  
ACTAGGCCATTCTCTGAGTAACTCACAGTGTCTTTTGTAGGCCCTTCTTTTTCCCTGAAAGACTGGTTGG  
TACTTACCTTGCAGAGCACATCCTGGGATAAGATCCCCAGTGTCTCCCCTGGGAGGCTCCCCCTCTGTGTA  
GCACCAGCCCTGGGAATGATGGAGCCTAGTGTATCGGGTTTTCTCCTGCTGTCTTTTCTGCAAAAGTTCACT  
TGTTTTACCACCCGCATGCTAGAGAGGAGCTCATTGGCCAATGCTTACCTTGTCCCCAAAGGGGTGGGTTGT  
GGAGCTCACTTAGGCAGGGCCTCTGGCTGGGGCCAGGGTTATGAGATAGGCCCTGTATGAAATATGCTCTGT  
TCTGGGGGTCTGTCTTTTTCTTCTCTTCAA AAACTTTGTGT CAGAGAGTCCCTTCTGAGT CACATAAATA  
CCTCACTATCCTGAAAAACAGGGCCTGGATGGT GACTGGGGT CATTGCCTTTGTGGACAGGATGGAGTGTG  
GTGTGGTCTGAGGAGCAGGTTGGGGTGGGGGAGAGGGAAAGGATTTGGGATCTTAGTTGCTGCCCTAGGTT  
AGGGGCTGGGGAGTGTATTTTTAAGATCCTGCCATGTTTTTAATCACTGTGATTTTTTTTTTATTCCCCT  
TTCCTAAAAAAATTTTTTCTCCTCAACTCTCTAAGCACTAAGGGCTGTGCCTGAGAATGGTAGCATTTTG  
GTCTTTTGTCTT CAGAACTGTGGTATCTTTGTCTTTTTTATTATTATTATTATTATTATTATTATTAC  
TATTGTTTTTAAAATGTCAGGATGAATTGT CAGACATATGGCCATGTGTTTGTCTCTGCTTCTCCCCTG  
TGGGAAGTTGTCTCCATGCTGTGA ACTGCTGTGGGGTGTGCAGCTGACTCAGTCCCTCTGAGCAGTTTCCC  
CACTGTGTCTGTCCCATCATGCGCTGGATCTGCTCATTCTCCTGCTGTGGGGTATGCCACCTCTTACCC  
CCTTGACACCATAGGGCTGCTGTGGCTGGGCCTCACCAGCACTGTCTTTTGTGTGACTCATGGCATCCTCG  
TTCATCCCCACCGTGCCTAGCAGGCCTTCTTTTACCACCTCGGAACGCTTGCCTTTCTCCCTCCACAA  
CAGGACGCTGTGCCTCAGTCTTACCTACCTCGCCACTCTGCCACTGTCCCCATTGGTCTTTTCTCCTAA  
ACTGGTCTTTGTGCTCTCTTTGTTTTTTCTTATTTCCCTCTTGTCTCTCATTTTTTTCTTCCCATTCCCCTC  
CCATTT CAGCCCTTAACTTTTTCTCTTTCCCATCTCCACTCAGTATTCCAATGGCAAACCCTGATGATGTAA  
CACCTGCGATGAGACATCGGACTCTCCGAACTTTCTCATCTGACACGTCTTTTTCCCAGGGTTCTGACTT  
CTCCTCCATTGGTCCCAGGCTAACTCCCCTGTTCTCTGTGGTGTCTGT CAGTCCGTCTGTCTTCTCTTTC  
CTCTGCCCTTCCCACAGGGCAGTATCTGCTGATGGATT CAGTCCCTGGTGTGTGATTGTTGTGATTTGTTCT  
TCCGTGCGCAAAAGGAAGAGGGCTTTTTGAGTCCCTTCCAAGT GAGATTGTAATGTAGAATTTTCCACTG  
TTGGATCTAGATTTTTTTTTCTTTTTTTTTGGGGGGTGGGGTTACAGAGCTGAGACCTTGTGCATGCATGT  
AGAAAATTGTA AATGTA AATTTTTTTTTAATATATAAAAAGCTTGTCTTACAGTTTGCAGTGGATCTAAA  
CATTACGGCAATTTTAGGATTTTTTTCTTAAACATAGGAACTAAA ACTGTACAAATTTTTTTTTATATAAAA  
TAAAGACATTTGACTTTTTGTGGGAAAAAAAAAAAAAAAAA  
IESLRVTVDFLKVPLGLKPKVLEKAVGPPKRPQPAALERYKARRSDAMDTESQYSYSGYSKSGHSRSSRKH  
RDRDRHRHSKSRDGGRGDKSVTIQAPGEPLLDNESTRGDERDDNWGETTTVVVTGTSEHSISHDDLTRIAKD  
MEDSVPLDCSRHLGVAAGATLALLSFLTPLAFLLLPPLLWREELEPCGTACEGLFISVAFKLLILLGWSA  
LFFRRPKASLPRVFLRALLMVLVFLLVVSYWLFYGVIRILDARERSYQGVVQFAVSLVDALLFVHYLAVVL  
LELRQLQPQFTLKVVRSTDGASRFYNVGHLSIQRVAVWILEKYYHDFPVYNPALLNLPKSVLAKKVS GFKV  
YSLGEENSTNNSTGQSRVIAAAARRRDN SHNEYYYEEAEHERRVRKRRARLVVAVEEAFTHIKRLQEEEQ

KNPREVMDPREAAQAI FASMARAMQKYLRTTKQOPYHTMESILQHLEFCITHDMTPKAFLERYLAAGPTIQ  
YHKERWLAKQWTLVSEEPVTNGLKDGIVFLLKRQDFSLVSTKKVPPFKLSEEFVDPKSHKFMVRLQSETS  
V

AUG initiation = 59.7 kDa  
AUA initiation = 65.0 kDa

+++++

## #18

### NM\_017457

CUG initiated extension conserved in eutherian mammals

#### CYTH2 cytohesin 2

Synonyms: ARNO; CTS18; PSCD2; SEC7L; PSCD2L; CTS18.1; Sec7p-L; Sec7p-like;  
CYTH2

ATACCTACACCGGCTTTTTGTACGACTGTTGGCCCTGGAGAACGATCCTTTGGTGGCGAGGGCGGGGAGGA  
CGAAAGCGCCCACTGTGGATTGGACAGTGTCAAAAAGAGGGGCGGTCCCTACTGAAGGGGCGGTTGGGCGA  
CGAAGGGAAGAGTCTTTTCAGCGCTGAGGACTGGCGCTGAGGAGGCGGCGGTGGCTCCCGGGGCGTTTGG  
CGGGCTCACCCGAGCCCGCGGGCCAACGCGGATCCAGGCCGACTGGCGGGACCGCCCCGATTCCCCGCG  
GGCCTTCTAGCCGCCATGGAGGACGGCGTCTATGAACCCCCAGACCTGACTCCGGAGGAGCGGATGGAGC  
TGGAGAACATCCGGCGGGCGGAAGCAGGAGCTGCTGGTGGAGATTAGCGCCTGCGGGAGGAGCTCAGTGAA  
GCCATGAGCGAGGTGGAGGGGCTGGAGGCCAATGAGGGCAGTAAGACCTTGCAACGGAACCGGAAGATGGC  
AATGGGCAGGAAGAAGTTCAACATGGACCCCAAGAAGGGGATCCAGTTCTTGGTGGAGAATGAACTGCTGC  
AGAACACACCCGAGGAGATCGCCCGCTTCTGTACAAGGGCGAGGGGCTGAACAAGACAGCCATCGGGGAC  
TACCTGGGGGAGAGGAAGAAGACTGAACCTGGCAGTGTCTCCAGTCTTTGTGGATCTGCATGATTCACCGA  
CTCAATCTGGTGCAGGCCCTCAGGCAGTTTCTATGGAGCTTTCGCTACCCGAGAGGCCAGAAAATTG  
ACCGGATGATGGAGGCCCTTCGCCAGCGATACTGCCTGTGCAACCCTGGGGTTTTCCAGTCCACAGACAGC  
TGCTATGTGCTGTCTTCGCCGTATCATGCTCAACACCAGTCTCCACAATCCCAATGTCCGGGACAAGCC  
GGGCTGGAGCGCTTTGTGGCCATGAACCGGGGCATCAACGAGGGCGGGGACCTGCCTGAGGAGCTGCTCA  
GGAACCTGTACGACAGCATCCGAAATGAGCCCTTCAAGATTCTGAGGATGACGGGAATGACCTGACCCAC  
ACCTTCTTCAACCCGACCGGGAGGGCTGGCTCCTGAAGCTGGGAGGGGGCCGGGTGAAGACGTGGAAGCG  
GCGCTGGTTTTATCCTCACAGACAACTGCCTCTACTACTTTGAGTACACCACGGACAAGGAGCCCCGAGGAA  
TCATCCCCCTGGAGAATCTGAGCATCCGAGAGGTGGACGACCCCGGAAACCGAACTGCTTTGAACTTTAC  
ATCCCCAACAACAAGGGGAGCTCATCAAAGCCTGCAAACTGAGGCGGACGGCCGAGTGGTGGAGGGAAA  
CCACATGGTGTACCGGATCTCGGCCCCACGCAGGAGGAGAAGGACGAGTGGATCAAGTCCATCCAGGCGG  
CTGTGAGTGTGGACCCCTTCTATGAGATGCTGGCAGCGAGAAAAGAAGCGGATTTAGTCAAGAAGAAGCAG  
GAGCAGCCCTGACCCCTGCCCCCAACTCCATTATTTATTACGGAGCTGCCCCGCCTGGGTGGCCGGACCC  
CTGGGCCTTGGGGCTGTGGATCCTGGTTCCCTGTTTGGAAAATTACCACCTCTAGCTCCTCACTGTTCTT  
TGTAATTAACACGCTGTTGGTAATCTTATTAATTATTTAACCACCTGGCCTGCTGACCCCTCATTCTTG  
GGTTGACAGAGTCGAGGTGCTCCGTGGAGCCAGCCTGTTTCCCTGGACAGGGGCCTGGACCCGCCTGTCT  
CTGGGTGCTGCCTGGGCTGTCCCGGTGGGTCTGTTCTGGTTTTACCCCGAGCCAGCAGGAGTGGAGTAAA  
GGGAGAAGGTTAATATGGTGGGAGTCTGGAGTTGGAATTGGCCGGGGACAGAGTTTGAATGCAGGGATTC  
AGGTCAGAGTCTAGCATTCTTAGAAGTTACTTGACAGCCATCAGCCAGTTACGCTACAGCCATCAGC  
TAGTTCCCATCGTTGCTTTTATGGGGCTTGGAGTCTTTGAGGGCAGGAGATGAAGCTGGTGGAGTTTGA  
GCTGGGCCAGGGCTTTGAGGACAACCTGGAGCTGGAAGAACATGCGACCACCTCAGGGAGGGTCAAGGAAG  
GATGAGTGGGGAGGTGGCCATGTCCTGCAAGGGCCTTGCTGATGGGATGTCCTGAAGGGCTGGGCAGCCT  
TAGATCGGGCTAAGAGGGCAGGACTGTGGGCCAGTGCCAGAGCCAGGCTTGTCTGTTCTCAAAGGATCAGC  
CTCCTTTGGAGGACATTTTGTGTCAAGGATAGGGCTGAGGACCTGCGTTCTGAACGTCTTTCTGGGATTC  
TTGACAGCCAAAGAAATTTCAGGATCGCCTCTATGAAGGTGAAGTCTTGGCATGTGGGTACCCCTGAATC  
CTGGGCTAAGGTCTGTGACCTTTTGGCCCTCCAGTTGGGGTATGTGTGGTGTCCCCAAAGAACAAGGGCTCG  
TGGATCCCGAGCAGGGTGCATGGCGGATTGGGAGGTCCCATGTCACTCTCCCATGCCCGCCTTTGAAGCT  
GAGGCGCTCTTTAGTTAACAACACTACAAGTCCAGCAGGGACCGGGACGCGGGTGGGAGAGGCGCCTGTGG  
CCCCGAGGCGTGCCGCGAGTTGTAGTCCCTCCTGCCCGCTGTGTTGCTTTTGGAGCTCTCCGATGGGATGC  
GGCGCTTCGGAATTTGGGCTTTGATCCCTGTCCCGCCTTGGCCACAGGCACCTGCCGGCCTGAAGGCC

CCGCGGTGGGGGTACCCTGCGCCCCTCCGCGGGAAGGTGGACTACAGTTATCGGCAGGCTGTGCGGGGCCA  
AAGCCACGGTGACCCAGACCCGAGGTTTTTCCGGGCGTTCGAGTTTCCCAGACTCCGTGGCGGCGTTTTGT  
CTTCTTTTTCTTAGTCAGATCCCCTACTTTTTGTGGAGGGTAGAGGAGGCTTTGACCGCCGCGGCCCGGGG  
GCTGGTGGGAAATGGAGTTCCAAATGAGAAAATAGAATTCCCCTTCTCTTTCCACAGGTGCCAGGGAA  
ACGGAGTCATCGACCCAAGAAGGTCGTGGGAGATGAGGTCCCAGGGTAAACAGCGGGTCCCGCCACTATGT  
CACCTTTTCTGCGCCCTCCCCGGATGAACTGCATGCAGGGCGGCCGGCTCCGTGGCAGGCAGAGGCAGGA  
AGAGGCGCGGAGCCCCTGGTGGCGAAGAGGGGAGTGCGGCGGGAGGGGAGGGCAGAGGCAGGCGGCCGGT  
CGCGTGGGGCCTGGGCCGCCCCAGGAGGGCCTCTGGCTGGATTCTTAGCAGATGGAAGCCGTGCAAGGGCA  
GGAGGCAGGGGCCTGACGTGTTTTGGATTGAGGTTGCAGGAGGGGCCCTGGCTGCTTCAGGGAGAATAATT  
TGGAGGCGAGCGGGGAGGTGAGAGGAAGCTGTGCGGTGCAGGATGGCGTGGCTGTGGAGGTGGAGAACGTT  
GGGCCACGCTAGGAGTCTTGAAGAGGAGGCCAAAAGGACTTGCTGAGAGCCGCCGAGCTGGTGAATGACG  
GTGCCATGACTGAGGTGGTTCGAAAGGGAGTATTTAAGGGGAAATCAGGCATTCCGTTTTGACCAAATTAAG  
CTGGAGATGCCTGTGGAACATTCCAGCCAGGCTGCATCACGTCACTGACCTTCAGCATTGCCACAGTC  
CATCTTCCCCCAGGACCTGAGGATTTTTGCGTCCGGCTCCCTCCTCGCCCAGGACCCCCAAGCTCCCAGCAC  
GCTTCTGATTTTTTTTTGTAGGTTTTTTTTTTTTGTTTTGTTTTGTTTTGTTTTGTTTTGTTTTGAGAGGGAGTC  
TCACTTTGTGCCCTAGACTGGAGTGCAATGGCGCCATCTCGGCTTACTGCAACCTCCACCTCCCAGGTGCA  
AGCGATTCCCCTGCCTCAGCTTCCCAGTAGCTGGGATTACAGATGTGAGCCACCGTACCCAGCTAATTTTT  
TGTATTTTTAGTAGAGACGGGGTTTTACCATATTGGCCAAGCTGGTCTCGAACTCCTGACCTCAGGCGATC  
CATCTGTCTCAGCCTCCCAAAGTGTGGGATTACAGGTGTGAGCCACCGCGCCAGGCCTCAGCCCCTTCT  
TTTGGGTGGCAATGGTTTTGGATATCGTTTTGCTCTACTAAAATTTCATGTTGAGATTGAGCCCCAGTGTGG  
CAGGTGTTGGGATGTGGGGCCTCATAAGGAGCTGTGTGGTCTTGGAGGTGGAGTCCTCATGGATAGATTAA  
TGCCTGCCTTAAGGGGTGAGTGTGCTCACCTTGGGAATTTGGGAATTTGGTTTTCTCTCCCTTGCTTC  
CTTCAGCACCATGTGATCTCTGTGCACACAGCTGCATCCTTCTGCCCTCCCCAGAAGCAGCAGCAGCCTC  
AGGGATGAGGGAGGTCCTCAGTGAGTGCACCTGCCAGTCTTGAACCTTCCAGCCATCAGAATCTGAGCCA  
AATCAACCTCTTCTTTATAAAGACCCAGCCTCAGGTCTTCTGTGAGAGCAACACAAAATGGACTCAGCAC  
GGATCAAATTGTGTCTCCCCACCCCCACAAAAAATTTATATTTAAATCCTAACCCCCAGCA

LRTGAEAAVAPGAFERAHPSPRANADPGPTGGTAPDSPRAFLAAMEDGVYEPDLTPEERMELNIRRK  
QELLVEIQRLREELSEAMSEVEGLEANEKSKTLQRNRKMAMGRKKFNMDPKKGIQFLVENELLQNTPEEIA  
RFLYKGEGLNKTAIGDYLGEREELNLAVLHAFVDLHEFTDLNLVQALRQFLWSFRLPGEAQKIDRMMEFAFA  
QRYCLCNPGVFQSTDTCYVLSFAVIMLNTSLHNPVNRDKPGLERFVAMNRRGINEGGDLPEELLRNLYDSIR  
NEPFKIPEDDGNLTHTFNPDREGWLLKLGGRVKTWKRRWFILTDNCLYFYFYTTDKEPRGIIPLNLS  
IREVDDPRKPNCFELYIPNNKQLIKACKTEADGRVVEGNHMYRISAPTQEEKDEWIKSIQAAVSVDPFY  
EMLAARKKRISVKKKQEQP\*

AUG initiation = 46.5 kDa  
CUG initiation = 51.0 kDa

+++++

## #18

### NM\_001010908

Non-AUG extension conserved in vertebrates

#### C1QL3 complement component 1, q subcomponent-like 3

Synonyms: C1ql; K100; C1QTNF13; C1QL3

TCAGAGTAATGCCAACTCTCTCTGAGTGGGATGAGCAGAGCAGATGCTGCAATGAGATGCCAAAGCGGCT  
CCCCTTCTCTGTGCCTTGGGTGCCTATAAATTGCTCCGGCGCGGTTTTGTGAGCCTCCTCTTCTCCTGGC  
AGGTGGTACCCAGGCAGAATTCTGCCTTCAGTCTCTCTCTCGCTCCGCTCCCGCCGTGAGGCGCTCGCCG  
CTGCTCGCTCGCTCCTCCGCCCCAGCTCTGAGCCTCGCCGTGCCGACCGTGCCCGCCGCCGCCGCTGG  
GCGCACCCGGGGACGCCCGGGCCCACGCGGGGCTTTGGGGTGCAGCTTATTGAGTTGTGGTGGTGGCA  
AAGGAGGAAGAGAGAAAGGAGGCAATAAAAAAAAAAAGGCAGCGGACGGGCGAACTGAGCGAGCGAAAGAAG  
AGGAGGAGGAGGCAGAAAAGGCAACTTCAGACGGAAAGTTGGTGCGAACAGGCGCAGTCTGCAAAAACGG  
AAAAGTCGATCGCAGGCGGCGGCGGCATAAAGTGTGAGCTGCCCGGGCGAGCTCAGGAGGCGGCGGCTGG  
CTCTGCCCTCCCGGTGGCCGCGCCGGCGCCGGCTGCAGCCACAGGTGCGAAGGAGCTCGCGGGGGCGAGG

GCGCCCCGCGCACCCCTCCCCGGCCCCACCCCGGGCTCGGGACTTCGGCTCAAGTCACTGGGCGCCCCG  
GCTCCCTCCCCAGCCGACGCTCCGCGGGGGAGCAGGAGTCCGGCAGCAGCGGCCGGCGCACGCAGCCCCA  
GGGGAGTTGGGGTTCGACGGGGTGTGTTTTCGGCTCTGAAGAGGTCCCCGCCAACCTTCAAATTCTGTC  
CAAAGCAGACAAGAGGATCGCCCCGCGCTGAGCCGGCTGGTGGGCAGCAGGAGGCGCCTGATCGCCGCCG  
GGGCGCTGGGGGTGGTGAATGGTGCTGCTGCTGGTGATCCTCATCCCGGTGCTGGTGAGCTCGGCCGGCAGC  
TCGGCGCACTACGAGATGCTGGGCACCTGCCGCATGGTCTGCGACCCCTACGGGGGCACCAAGGCGCCCAG  
CACCGCTGCCACGCCCCGACCGCGGCCTCATGCAGTCCCTGCCACCTTCATCCAGGGCCCCAAAGGCGAGG  
CCGGCAGGCCCGGAAGGCGGGTCCGCGCGGGCCCCCGGAGAGCCCGGGCCACCCGGCCCCATGGGGCCC  
CCGGGCGAGAAGGGCGAGCCGGGCCGCCAAGGCCTGCCGGGCCCGCCCGGGGCGCCCGGCCTGAACGCGGC  
CGGGGCCATCAGCGCCGCCACCTACAGCACGGTGCCCAAGATCGCCTTCTACGCCGGCCTCAAGCGGCGAG  
ATGAAGGTCACGAGGTGCTCAAGTTCGACGACGTGGTCACCAACCTCGGAAACCACTACGACCCCAACC  
GGCAAGTCCACTGCTCCATCCCGGCATCTACTTCTTACCTACCACGTCTGATGCGCGGAGGGGACGG  
CACCAGCATGTGGGCTGATCTCTGCAAAAACAACCAGGTGCGTGCTAGTGCAATTGCCCAAGATGCTGATC  
AGAATTACGACTATGCCAGTAACAGTGTGGTTCTTCAATTTGGAGCCGGGAGATGAAGTCTATATCAAATTA  
GATGGCGGAAAGCCCATGGAGGAAACAACAATAACAGCACGTTTTCTGGATTTATTATTTATGCTGA  
CTGATAATGCAGAACTAAGCTTATTATTCTGAGTTTGAACACTGGATTTCGTATGGCTAACGTCAGTGAAT  
CAAGGATCCCAGGGGATGCCAATGGCAGGGCACCTCAGTTGTGTATATGTGGGGAAATCAAATGCTACCTG  
ACTCACATCTGTATCACTCAGAAACATTATGTAATAAATATCAAAGCAAGATAAGCAGATGTGTGATCCAC  
TACCGCCAAAGCAAATACTCCTTATCGTTAGTGTCCATGTGAATGAAGTCTATATAGATCACAAATTTTT  
ATAGACAAATCTAAGACATTGAATTATTTCTTCTATATATATGATACTTTGGTGTACTGTGATCTTGCTGC  
TTTTATCCATATGTGAGCTTTGGTTCTTGTGAGTTTACCTGCTTATTATGATACTTGGAGTCCATTATAG  
TGTGGGAAGAATGATTTTTGCCCTGCAGGAGAAGGTCTAATTGAAATAATGCTGCTTGTCCCCAAAGAAA  
TTGTTTGCCTTGTACTCTTGTAAACCTTAGAGCTAGACCTGGGAATGATTCAACTTCAAGCCTTAACCTGG  
AATTTTCTGGATTTGAGGGAATCCCAAGCCTATGATCTTTTTTACATTTTTCTTTTTCTTATATGAATTTT  
CTTTTCTCTTTTTCTGGTGATAGTCTTTAAAAATAGAGATTGACAGTGTATCATAGGATTACCCTCTAAG  
TGTGAAAATGTGTAATTATGTACGGTATTTAGAAAAAGCCCTTATGTGTCCATTTTGTCAACTGAATACAT  
TTAGATTC

ILSKSRQEDRPALSRLVGSRRRLIAAGALGVVMVLLLVILIPVLVSSAGTSAHYEMLGTCRMVCDPYGGTK  
APSTAATPDRGLMQSLPTFIQGPKEAGRPGKAGPRGPPGEPGPPGPMGPPGEGKEGEPGRQGLPGPPGAPGL  
NAAGAI SAATYSTVPKIAFYAGLKRQHEGYEVLKFDDVVTNLGNHYDPTTGKFTCSIPIGIYFFTYHVLMRG  
GDGTSMWADLCKNNQVRASAI AQDADQNYDYASNSVVLHLEPGDEVYIKLDGGKAHGNNNKYSTFSGFI I  
YAD

AUG initiation = 26.7 kDa  
AUU initiation = 30.1 kDa

+++++

## #20

### NM\_001008223

Non-AUG extension conserved in vertebrates

#### C1QL4 complement component 1, q subcomponent-like 4

Synonyms: C1QTNF11; MGC131708; C1QL4

ATACACCCGCGCCCCGGGAGGGAGGGGAGGAAGGTTAGGGAGGCGGAGAGGGACCCGCCCCGAGGAGAGA  
GGCGCGGGCCAGGGCTCTAGCAGGGACTGGGGCCGCGGCAGGGGTAGCAAGGTGAGTCGGTGCTTGCCAAG  
AGGCAGAGCGCAAAACCTACTAGGAGATCGCGCCCGGTGAGCAGCACCCGCGAGCTCAGAGCCCGGGACGTC  
CGGAGCGCGGGGAGCAGTCCCCTCTCCATCAGGGAGTGGTCTATCTGGGCAGTCTGGGACCCAGGCACCGC  
GCCATCCCTGAGAGAGCAGCAGTCTGGAGAGCAGGCATCTCAGATCCCTAAGAAACCAGCCGTCCGAGAAG  
CCGCGGATCTCAGGTGCCCAGGATCGTTAGGACTGAACGGGAGGGTACTAGAGGACCACTGGCTCTGGACC  
GTCGGGAGCTGCCCCGACGTAACCCACGAGGGGCCTCCCCTTGACGGACGGCTTGGGGAGCGGCACCGCC  
GCGGCTGGAGCCCGCAGAGGCAGGGTAAGGGGAGCGGGGGCAGCCGTGCGGGGAGTGCAGACCCAGGCC  
AAGGCGGGTACC GCCTCCTGCCCCGCGGAGAGCCCCGCCCCGCGAGCCATTGCGCCCAAGAGTGAGGAA  
GATTTGCTGGCCCTGGCAGCGTCGCGGCTGAGCCGCCGAAGAGGGTGGCGGGCGCGCCGTGCGAGTGGC

CATGGTGTGCTGCTGCTGCTGGTGGCCATCCCGCTGCTGGTGCACAGCTCCCGCGGGCCAGCGCACTACGAGA  
TGCTGGGTGCTGCTGCCGCATGGTGTGCGACCCGCATGGGCCCCGTGGCCCTGGTCCCGACGGCGCGCCTGCT  
TCCGTGCCCCCTTCCC GCCAGGCGCAAGGGAGAGGTGGGCCGGCGGGAAAGCAGGCCTGCGGGGGCC  
CCCTGGACCACCAGGTCCAAGAGGGCCCCAGGAGAACCCGGCAGGCCAGGCCCCCCGGGCCCTCCCGGTC  
CAGGTCCGGGCGGGGTGGCGCCCGCTGCCGGCTACGTGCCTCGCATTGCTTTCTACGCGGGCCTGCGGCGG  
CCCCACGAGGGTTACGAGGTGCTGCGCTTCGACGACGTGGTGCACCAACGTGGGCAACGCCTACGAGGCAGC  
CAGCGGCAAGTTTACTTGCCCCATGCCAGGCGTCTACTTCTTCGCTTACCACGTGCTCATGCGCGGGCGG  
ACGGCACCAGCATGTGGGCCGACCTCATGAAGAACGGACAGGTCCGGGCCAGCGCCATTGCTCAGGACGCG  
GACCAGAACTACGACTACGCCAGCAACAGCGTCATTCTGCACCTGGACGTGGGCGACGAGGTCTTCATCAA  
GCTGGACGGCGGGAAAGTGCACGGCGGCAACACCAACAAGTACAGCACCTTCTCCGGCTTCATCATCTACC  
CCGACTGAGCCCGCCCCCGCCCGCTGCCCGCTCGCCCCCTTCTCTCCCGTCCCTCACCCACCTCCTGCCCGC  
CCCACCCGAGGCGCCACCCACCTTTGAGAGCCTGGCGGTGGGGTGGACCCCTCCGTTCCCGGAGGCGGC  
CTAAATGGGCGAACTCTTGGTGTCAAGGGTATAAGTGGCCGGGAAGAGGAGGAGACCCGCCAGAGGAGC  
AGAGCGACTTCCGGAGGGATCACCCGCACCCAAGTGC GCGCTGGACCCCATAGGGGCAGAGGTCGTGGCTT  
TCTCTTTTGTACAGAGATGGGGAGCAGTTTTAATAGCGGGACTCAGAGGCCAGAAAGCCGGAGGGAAGCC  
CCCGCAGCTTGCAGGGAAATAACAGAAACAGGAGGAGCCATTTAGGCAAGAGAAGACATTAACAGGG  
TAGTGCAGGTTCTCCGTCACAACTTTCTCTCGCCACCCTCTCGTCCCCTCGTCTCCACTTTTCAGGCTCAGG  
CTCCAGCCTTGGCAGCCTTCTGTGAACCTGGAGGAACCAGTGAATTCTTTCTGGCATTAAACGCATTC  
TGTACAGTCCCCATTCCCCCTATCCGGACTAGGCCCTGGGGCTACAGCTGCTGCTGCCTCTTCTAATAAA  
GTGAGG

IAPKSEEDLLALAASRLSRRKR VAGA AVGVAMVLLLLVVAIPLL VHSSRGP AHYEMLGRCRMVCDPHGPRGP  
GPDGAPASVPPFP PPAKGEVRRGKAGLRGPPGPPGPRGPPGEPGRPGPPGPPGPGPVAPAAGYVPRIA  
FYAGLRRRPHEGYEVLRFDDVVTNVGNAYEAASGKFTCPMPGVYFFAYHVL MRGGDGTSMWADLMKNGQVRA  
SAIAQDADQNYDYASNSVILHLDVGDVEVFIKLDGGKVHGGNTNKYSTFSGFIIYPD

AUG initiation = 24.9 kDa

AUU initiation = 28.0 kDa

+++++

## #21

### NM\_001002914

Conserved all the way to fish where the extension is initiated by AUG

**KCTD11 potassium channel tetramerisation domain containing 11**

Synonyms: REN; C17orf36; MGC129844; REN/KCTD11; KCTD11

ATTAGAGGCTCCAGCCCCGCCGACTTGCAGACGTGAGATCGGGCACACCTGAGCGGCGGGCGGGGCGGTTCGT  
GGCCACATCCGGGGCGACGTGCCTGAGTACCCCGTCCC GCCAGCGTCTGCCAGTCCAGCCAGTCCGCCCA  
GTCTCTCGCGTCCGAGACTCGCCTCCAGCCTCCACCTCCGCCCGGGCCGCGGAGCCTCGCGGGGGCGGG  
GGCGGGGCGCAAGGGGCGGGGCTGTCTTTAAAGGGCCCCGGGCCGCTGCCCTTAGGCCACTTCTGGGG  
GCGGAGAGGACCTCAGCGGCTGCGGCGACACCCAGGGAAGGCGGCGCGGCCGGGTCCCGAAACTCCTGGCT  
GTTTCCATCAGAGCCCTCGGACACTCCCAGCCCGGGCTGAGCACGCATCGTTCGCTCCCGGGCGGATAACAAG  
GGGCTCCGCCATCCGCTCCCGTCAGTTCGGCCTCCATCTCTGGGACCCGCGCCGGCAGCCAGGCCAGGC  
CTCTGAGTGGCCCCAGAGCCCTGGCTGGACTCGTCCACGGCGGCAGCGATCTGCCCGGGGTCTCGGAGGCC  
ATCCCTTCAGAGTCGGCCCTGTGCTCGCCACCCTCACCTGCTGGTTGGATTCCGGAACCCACTGTCTGAA  
GACCACAGAGGGGTGTGCTGACCACCCCAAATCGGATACGTCCAGACCTCAAGCTCCCTTCCCCTCTCTG  
GCTGCCCTCTGCTCTTTTCTCTCTTCTCAACCTTTTGGGGATTTCTGTGCTCCTGACACCACCTCCCCA  
TCCACCACCAAAGTAGCCGGGGTGGAGCCCCAAACCTTACTGGGTGTGCTCCACCTGTGCCTCCAACCCAGC  
GAATCTGACAGCTTCGACCCAATTCTGCACACACCCAGGAAGTTCTGCCTTTTCTTTTCTTTTCGGTGTCTC  
CTGTACTTCCCAAAATTCTCCTCCTCCTGTGCCCTCTTCGCCCCCTCCTTTGGGGCCCCGTGACCCTG  
AATCTGGGGGGCACACTATATTCCACCCTTTGGAGACCCTGACCCGCTTCCAGACTCTATGCTGGGGGC  
CATGTTTAGGGCCGGCACCCCATGCCCCCAACCTCAATTCCAAGGAGGCGGCCACTACTTCATCGACC  
GGGATGGCAAGGCCTTCCGGCACATCCTCAATTTCTGAGGCTGGGCCGCTGGACCTGCCCGTGGGTAC  
GGAGAGACAGCGCTGCTCAGGGCAGAGGCTGACTTCTACCAGATCCGGCCCCCTCCTGGACGCGCTGCGGGA



ACCAGACTGTTGATCTCCTCATGCAAGAGTCAGGATGTCGTTTTAGAACATCCTTCTGCTACCAAATTCGGA  
AATCATGTCATGGAAGGAGACTGGGATAAGGCAGAAAATGACCTGAATGAACTAAAGCCTTTAGTGCATTC  
TCCTCATGCTATTGTGGTAAGAGGCGCACTTGAAATCTCTCAAACGTTGTTGGGAATAATTGTGAGGATGA  
AGTTTTTGCTGCTGCAGCAGAAGTACCTAGAATACCTGGAGGATGGCAAGGTCCTGGAGGCACTTCAAGTT  
CTACGCTGTGAATTGACGCCGCTGAAATACAATACAGAGCGCATTGATGTTCTTAGTGGGTATCTGATGTG  
TAGCCATGCAGAAGACCTACGTGCAAAAAGCAGAATGGGAAGGCAAAGGGACAGCTTCCCCGATCTAAACTAT  
TGGATAAACTTCAGACCTATTTACCACCATCAGTGATGCTTCCCCCACGGCGTTTACAGACTCTCCTGCGG  
CAGGCGGTGGAACTACAAAGGGATCGGTGCCTATATCACAATACCAAACCTTGATAATAATCTAGATTCTGT  
GTCTCTGCTTATAGACCATGTTTGTAGTAGGAGGCAGTTCCTCATGTTATACGCAGCAGATACTTACGGAGC  
ATTGTAATGAAGTGTGGTCTGTAAATTCTCTAATGATGGCACTAAACTAGCAACAGGATCAAAAAGATACA  
ACAGTTATCATATGGCAAGTTGATCCGGATACACACTGCTAAAACCTGCTTAAAACATTAGAAGGACATGC  
TTATGGCGTTTTCTTATATTGCATGGAGTCCAGATGACAACCTATCTTGTGCTTGTGGCCAGATGACTGCT  
CTGAGCTTTGGCTTTGGAATGTACAAAACAGGAGAATAAGGACAAAAATGAGCCAGTCTCATGAAGACAGT  
TTGACAAGTGTGGCTTGAATCCAGATGGGAAGCGCTTTGTGACTGGAGGTGAGCGTGGGCAGTTCATCA  
GTGTGACTTAGATGGTAATCTCCTTGACTCCTGGGAAGGGGTAAGAGTGCAATGCCTTTGGTGCTTGAGTG  
ATGGAAAGACTGTTCTGGCATCAGATACACACCAGCGAATTCGGGGCTATAACTTCGAGGACCTTACAGAT  
AGGAACATAGTACAAGAAGATCATCCTATTATGTCTTTTACTATTTCAAAAAATGGCCGATTAGCTTTGTT  
AAATGTAGCAACTCAGGGAGTTCATTTATGGGACTTGCAAGACAGAGTTTTAGTAAGAAAGTATCAAGGTG  
TTACACAAGGGTTTTATACAATTCATTCATGTTTTGGAGGCCATAATGAAGACTTCATCGCTAGTGGCAGT  
GAAGATCACAAAGTTTTACATCTGGCACAACCGTAGTGAAGTCCAATTGCGGAGCTGACAGGGCACACACG  
TACAGTAACTGTGTGAGCTGGAACCCACAGATTCATCCATGATGGCCAGCGCCTCAGATGATGGCACTG  
TTAGAATATGGGGACCAGCACCTTTTATAGACCACCAGAATATTGAAGAGGAATGCAGTAGCATGGATAGT  
TGA

TGGTGAATTTGGAGCAGACGACTTCTGTTTTAACTTAAAATTAGTCGATTTTTAATGGCTTGGGATTTG  
GTGCAAAACAAACATGATTGATAGCTGGACAGACATGCTCGTCATGAAAAAGAACCATTTCTGAAGCCCGA  
TTGGGGCCAAACATTTACACCTTGCTTCATAGTAACCAGTTGAGATGAAGCACGTCGTTAGAACGTTGTTG  
GACACCATGTTGAATTAATCCCCCATCGGTTGTGAAGAAGTGTGCTACATTCAGGCTTACCCATTGAACTC  
AGTATATATATTTTTTCTTCTGTCTTTTGTCTGGCAGGATACCATTCTTGTGCTCTTCTGTGTAATG  
AAGTTTAAATGCTTTGTTTGGAAAACCTTTATTTAACAGTTTTAGAAGGCTTGATAGAAAGAGTGCATTAGTCT  
GAAGAGTATACATTTGGATAGGAAAGAATTTCTTCTTTTCTTCCAAATCTTTCCGCCTTATTTAGCTT  
GAGATCTTTGCAGCTTTGGTTTATGGATTTGACCTTTGCCGTTGCGCAGTATATACTGATCCAGATGATAA  
ACCAGTGAACATGTCAAAGCACTCTCAATATTACATTTGACAAAAAGTTTTGTACTTTTTACATAGCTT  
GTTGCCCGTAAAAGGGTTAACAGCACAATTTTTTAAAAATAAATTAAGAAGTATTTATAGGATTAAGTG  
ACTTCATTTGTATACATTTGGAATCTAAACCAGCTTAAAAACAGTTTTCTCAATGACTTAGATACACAGTA  
TAACTGATGCTCTTCTGGAATACCACATGAGACATGGTCAGAAACAGTGCTTGAAGGACATTACACAAGA  
AATTCAGAGTAATGCTTTGAAGATTTCCCCCTTTTGTTTTTATTCTGAAGGAACATCAGTACCCGATCTT  
GAAGAAATTCAGATTTCAAAAAGAATTTTAAATACACCAACATGAGACATCAGTAGTCAGTTGGTTTTTCAG  
TAAAGCTTGTTCGAAGTTGTTCTCAACTTAGGAAGTAATTTGGTGTGATCTAGCAAAAGAGTAGGAATCA  
GCGATACAACCACTTTGGAAGTTTATAGTATAATTGAAATTTATAGAAGAATTCAGCAGGTTACAGACATA  
CTTAAACTGGGATTAACCTCATAGTCATTTTTCTTAATTGCCCTTAATATTTTACATATAGGGATACA  
TAAATTTAAAGAATATTTTTTCTCAGTTTTTTCAGATATTGCCATACTGAACCTCATTCTAAACTGGTGCT  
GTGGATAGTCTTTCCCTCTCCCTCCTGTTTTAGTTTAAAGGAAAGGTTTCTTTCATGGAAAAGCACTTTTA  
ATTTTGAGAATTTACATTTAAAATAAGCCAAAAGCCTGATGTTTACATTTGTGCTTTTTAACTCCGTAACA  
GCTGAATACAACATAACATAGTCTCCCTTGAAATTCCTCCCTTTTTTTCAGTAGAGGATAAATAGGGTGACT  
CCAGCTGTTGGAATGAGAATGGGGATACCCCCAAAATAAGATTCTGGTGAAGAAAAAGTCTTGTACTAAGT  
TCCCCTTTAGGTGTAGCCAAGTCTATAATATAATTATGATCATGAATAGACTCCAGAATCCACAAAGAGAA  
GAGGGCTTGGATGTCAAAAATTTCTCATTGTGGGTAGGTGGTCGGGGATGGGAGAAAGGGAAAAGTCAG  
GGAAGGGGAGAAGAAAAGAAAACACATTTGGCCTTAAAATAGCATGCATTCTCCAGAAGCCCATAGTAAA  
GAAAATGACAGATCGTGGTCAGCAGACTCTTATCAAATTTGGTATGTAAAAGATTTCTTCAAGCTCCATTTT  
GCAGAGACCACCCTTAGAGAATCAAAAATTTCTGTTTTGATACTTCTAAGTTAAAATATATGTTACAGT  
TTATCTGGTACTTTCATTTTTCTTAACTAAAATTACTTTTTACTTTTAAAGCTTGAATAAAAATCTTCAATGGT  
AACTGTATGTAATTAAGTGGCAACTTCTCTTTACCTCAGTATAGTTAAAAACCATTTCATTTTTAAGTGAT  
TCATGTATACCCTGAAGCCGTTAATACACCCAGTCTCTATGGTAACATCACTAAATGTGGGCATAGAAAC  
TCCACAGCTGTTTACAAATTTGGTTACAGTGTGCTACGGTGCATTTGTAACACTCAGATTTGTGCCCATTC  
AGGGGCAATTTGGCACTCAGATTTCTACTCTACTTCACCTAACCCACCTAGATCTGAGTTTTTCAGAGTGCT  
TCTGAAGTACAGTTTTAAAACACTTTTTTAAAAGTGGAGTAAAAGTGAGGCACATTTTACAAGAACATAAC  
TCCTATTTAAACGGAGTAACAACATGCAAAGGTTTCTATAGCAGCTAGGTGAGTTTTGTTTTCCGGGTCTG  
TCTTAACTGGCAGCTTCTGTACATACTGGTACTTATTTGCTGTAAACGTCGTTTTCATACATTTGCCATG



Synonyms: ESG; ESG3; GRG3; FLJ39460; HsT18976; KIAA1547; TLE3

AGTCCCTATTTGAACTGCTCTCGCGGCAGTTTCAGACCTCGTGCTCGTCCCCTTCGCCTGTCTGTGTGTGG  
TATCCGTAGGTCCGGGGCACTTTTTTTTTTTGGTGTGTGTGTGTGTGTGCGTGCAGCGCTGTGTGTGTGGG  
TGTGTGTGTGTGTGGGGTTTGGCGGGGCGCGGAGAGAGAGCCGGGCCGAGGGGAAGGAAGGAAGCCGTAG  
AGCTCCCCGGTCTCGGGCTGCGTCTCCCCTCCAGCGCTCTCCTGCCTGTGCGCTCCGACGCGGCAGCGGCG  
GTGGCGCTGAGCGCTCCTCGGTGGGGACGCGGTGCTCAAGCTGGGAGCAGCGAGAACCCTTTGCGGAGGCT  
TCCCGTGCCCGCTGGACTTAGGATGCCAGGGCGTTTGATTTGCACCTACTGAGCCCGGAGTTTCTCCCCGG  
CCCTGGGAAGGGCTTGACAGCGGCGGCGGCGGCGGCGGCGAGCAGTAGCAGACCGAACAGCAGGCTCTCC  
TCTCCGAGGGGGGGCGTGAAGCGCCCCGCGCCGGGCTCCCCGCCCTCACCTCCGGCGCTCCTGCGGCCCA  
AGCCACCACCTCGTAGCCCGCCTCCTTCTTCTCGCCGCGAGCCCCAGGCCCGGACGCCTCTAGGATCG  
GACCCGCGCGCCCCGGATGCTTGGGGCTGCCCGGCGCGCCCCCTACAGGCGCGACCCGCTGAGTGACCC  
GGAGGGGGCCCGAGCTCGCCCCAGGAGGGGCCCGGCTCGGGACCCCGCGCCGGACCTGCTGGGGAGCC  
GACGATGTCCGCGCAGTCCCAGGCATTTGACGCGCTCGACGACCCAGGGAAGGCGGCGGCGCTGCCCG  
CAGAGCCCTAGGCGCACAAAGCCCCGCGCCCGCCGCGCCCGGCGCCCGGCGCCCGGACGACTTTGCCGCTGC  
TCCGCGGCTCTTTGTCTCCACTTGGGGCGGGCGCCGACTCTGGGATTTGCTGCGAGAACGAGCTGGGGG  
GGCCGGGGGCGAGCTCTCGTTTTCCCGGCCGCCCGGCTCGGGCTCGGCTCCCCCTCCCCGCACCTCC  
CCGGCCCCGGGCTCTCGGCGCTTCCACGCTCTCGGAATCACGACCCCTCCCTGCCATGTATCCGCAGGGCAG  
ACATCCGGCTCCCCATCAACCCGGGCAGCCGGGATTTAAATTACGGTGGCTGAGTCTTGTGACAGGATCA  
AAGACGAATTCAGTTTCTGCAAGCTCAGTATCACAGCCTCAAAGTGGAGTACGACAAGCTGGCAAACGAG  
AAGACGGAGATGCAGCGCCATTATGTGATGTACTATGAGATGTCTATGGCTTGAACATTGAAATGCACAA  
GCAGACAGAGATTGCGAAGAGACTGAACACAATTTAGCACAGATCATGCCTTTCTGTCAAGAGCACC  
AGCAGCAGGTGGCGCAGGCAGTGGAGCGCGCCAAGCAGGTACCATGACGGAGCTGAACGCCATCATCGGG  
CAGCAGCAGCTCCAGGCGCAGCACCTCTCCATGCCACACACGGCCCCCGGTCCAGTTGCCACCCACCC  
GTCAGGTCTCCAGCCTCCAGGAATCCCCCAGTGACAGGGAGCAGCTCCGGGCTGCTGGCACTGGGCGCCC  
TGGGCAGCCAGGCCATCTGACGGTGAAGGATGAGAAGAACCACCATGAACTCGATCACAGAGAGAGAGAA  
TCCAGTGCGAATAACTCTGTGTACCCTCGGAAAGCCTCCGGGCCAGTGAGAAGCACCGGGGCTCTGCGGA  
CTACAGCATGGAAGCCAAGAAGCGGAAGGCGGAGGAGAAGGACAGCTTGAGCCGATACGACAGTGATGGAG  
ACAAGAGTGATGATCTGGTGGTGGATGTTTCCAATGAGGACCCCGCAACGCCCCGGGTGAGCCCGGCACAC  
TCCCCTCCTGAAAATGGGCTGGACAAGGCCCGTAGCCTGAAAAAAGATGCCCCACCAGCCCTGCCTCGGT  
GGCCTCTTCCAGTAGCACACCTTCTCCAAGACCAAAGACCTTGGTCATAACGACAAATCTCCACCCCTG  
GGCTCAAGTCCAACACACCAACCCCAAGGAACGACGCCCAACTCCAGGCACCAGCACGACCCAGGGCTC  
AGGTGATGCCGGGTAAACCTCCGGGCATGGACCCGATAGGTATAATGGCCTCGGCTCTGCGCACGCCCAT  
CTCCATCACAGCTCCTATGCGGCGCCCTTCCGCTATGATGAGCCACCATGAGATGAACGGCTCCTCCACCA  
GTCTTGGCGCCTACGCGGCTCCACAACATCCCACCCAGATGAGCGCCGCGCCGCTGCTGCAGCCGCT  
GCCTATGGCCGATCGCCAATGGTGGTGGTGGTGGTGGTGGTGGTGGTGGTGGTGGTGGTGGTGGTGGTGGT  
AGGCCTCCCCTCAAGCCTGGCCTCCATTCTGGAGGAAAACCAGCGTACTCATTCCATGTGAGTGCTGATG  
GGCAGATGCAGCCCGTGCCTTCCCCACGACGCCCTGGCAGGCCCGGCATCCCAGGCACGCCCGGCAG  
ATCAACACACTCAGCCACGGGGAGGTGGTGTGTGCCGTGACCATCAGCAACCCACGAGGCACGTCTACAC  
AGGTGGCAAGGGCTGCGTGAAGATCTGGGACATCAGCCAGCCAGGCAGCAAGAGCCCCATCTCCAGCTGG  
ACTGCCTGAACAGGGACAATTACATCCGCTCCTGCAAGCTGCTCCCTGATGGGCGCACGCTCATCGTGGGC  
GGCGAGGCCAGCACGCTCACCATCTGGGACCTGGCCTCGCCACGCCCCGCATCAAGGCCGAGCTGACGTC  
CTCGGCTCCCGCTGTTATGCCCTGGCCATTAGCCCTGACGCCAAAGTCTGCTTCTCCTGCTGCAGCGATG  
GGAACATTGCTGTCTGGGACCTGCACAACCAGACCCTGGTCCAGGCAGTTCAGGGCCACACAGATGGGGCC  
AGCTGCATAGACATCTCCATGATGGCACAAACTGTGGACAGGGGGCCTGGACAACACGGTGCCTCCTG  
GGACCTGCGGGAGGGCCGACAGCTACAGCAGCATGACTTCACTTCCAGATCTTCTCGCTGGGCTACTGCC  
CCACTGGGGAGTGGCTGGCTGTGGGCATGGAGAGCAGCAACGTGGAGGTGCTGCACCACACCAAGCCTGAC  
AAGTACCAGCTGCACCTGCACGAGAGCTGCGTGCTCTCCCTCAAGTTCGCCTACTGCGGCAAGTGGTTTCGT  
GAGCACTGGGAAAGATAACCTTCTCAACGCCTGGAGGACGCCTTATGGAGCCAGCATATTCCAGTCTAAAG  
AATCCTCGTCTGTCTTGAGTTGTGACATTTAGCGGATGACAAATACATTGTAACAGGCTCTGGTGACAAG  
AAGGCCACAGTTTATGAGGTCATCTACTAAACAAGAATCCAGCAGGCTGTCAAATCTGGGAGAAACCCG  
ACTCGGCTCTGACAGGAGACCCCCAGGCGAGGGGCCGAGGATGGCGGAGGATGGGCGGAGGATGGGCGAGCCG  
AGCGTTCCAGGGCTGCGCTCCGGCCGGCTGAGAGGGCACGTGCCCGTCCAGTCTGGACTCCTGGCCCTGG  
ATTGATGTGTCTCACAGACTCGGAAGGGTTCTGCTCCTCCTCCTCCCCCTGAACAATGCTGGCAGTTGCTA  
CAAATAGATTTATTGGAGGCTTATGGCTCCGGTTCCCCACAGACCCGCTCATGAGTCTCTGTTTTGTTCTT  
CCCTTTTCTTTTGGCCTGTCCCTCACCTTGGGTGCGGGGTGCTGGAGTGGACCACAATGTTGTGCTGGGGG  
ATGGGGGGGTCTCTCTTTGCCGATTGTGACGTGCACAAGATTTGTGAAAATGTAAATAACAGACTCCTAT

TGCGGACTGATCAGTGGGAGAGGAGGCCCTTCCCACCGGAAACTCTGAGTGTGTATTTTCGCTGCTGTAT  
TTGTAATCCACTCGTGGTGGTGGCTTTTTTTTTTTTTTTTTTTTTTAAATAAACAGATGCTCTCACCTGGGAA  
GAGGAGACAGGGAGGGGAACCAATTGAAGAAAGAGGAGAAAAGTCTTAGAGTGTGGAAAAGGCAACCAGGT  
TGGCCGTAAGGTGCCTGCTGGAATGCGTGTGCCTCCACACGGGTCTGGGCATCCGGACTGATAACCAGCCG  
GCCAGACTGAGGGATGGAAGGCACTGAGATGGGGGCCCGTCCAGGCGGACACCCGCAGAAATGGAGCTTTC  
TGTGGTCTCTTGCCTGCTGCTTGGCTGCTTGGCCCTCTCTGTGTCTCTCTTTCTTGGTCTCTCCCTCTCTCCT  
CCTCAGCCTGGTCTTTCTCTTTGGTGCACACTTAGTTATTGTTGTGAGCAATGGAAGTTCAAAGGAACTCC  
CTCTCCAGCTCTTCTGAATCTTGGGACACAGCCTAAAAAGGACAAAAAGTTAGAAGACAGCATAGCAACTC  
AGCTCAGGGAGCTACCAGAGAAAAATAGCAACTGATGTGGGTGCTTTTTTTTTTTTTTTAATTTGAATAAAA  
AAGAATTAGAAGTGTGCTTTTATAAAATGCCTTCTCCCCCTTCCCGCCTACAGTCTCTTCTCTCCCC  
TTAGAGGGGGGAAAAGTGTATAAACCTACAGGGTTGTGAGTCTGAAAAGAGGATCCCCCTCACCCCCACCCT  
GGCAGAGCAGTGGGGTTGGGGGGTGGGAGAGGGGGACACAGATCCTGGCACACTGTGGATATTTCTTGC  
AGATTGCAGTCTCTTGTGGCCAAACAGGTTAGGTAGACTATCGCCTCTGGCAGGTGCCACCTTTTGGTAC  
CAACATGTTCTGAGGTGTTAGGATTTGGGTTGGGTTTTTTTTTGTGTTGTTTTTTTTTCTTTTGGTCTTTTT  
TTTTTTTCTCTTTTAAAGAAAAGCTAAAGGCCGCTGTGAGTCTGGTGGCAGGCTCTCCATGGATGTAGC  
ATATCGAAGATAATTTTTTATACTGCATTTTTATGGATTATTTTGTAAATGTGTGATTCCGTCTGCTGAGGAG  
GTGGGAGGGGCTCCAGGGAAAGCCACCCACCTTTCAGTGGGTTGCTCCCCAGCTGAGCGCACCGGGCATGG  
GATGTGGAGGCTGGCGACACACCCTGTGCCTCTCCAAGGCTGGGCGCGTGGGGCGTCCAGAGTCTCTCTGG  
GTCTCAGATGTCCATCTGCCACCTCTTGTAAAGGCTCTAGCCAGAAGGGAGGGTGAGGGTAGAAGAAAGTT  
ATTCGCCAAGAAAAAAGAATGAAAAGTCATTGTACTGAACTGTTTTTATATTTTTTAAAAGTTACTATTTA  
AAGTTAAAAAATAAAAAAAAAAAAAAAAAA

LGFRCENELGGPGASSRFPGRPPLGLGSPLPRTSPARALGASTLSESRPLPAMYPOGRHPAPHQPGQPGFK  
FTVAESCRIKDEFQFLQAQYHSLKVEYDKLANEKTEMQRHYVMYYEMSYGLNIEMHKQTEIAKRLNTILA  
QIMPFLSQEHQQQVAQVERAKQVTMTELNAIIGQQQLQAQHLSHATHGPPVQLPPHPSGLQPPGIPPVTG  
SSSGLLALGALGSQAHLTVKDEKNHHELDHRERESSANNSVSPSESLRASEKHRGSADYSMEAKKRKAEEK  
DSLRYDSGDGKSDLLVVDVSNEDPATPRVSPAHSPPENGLDKARSLKDDAPTSPASVASSSTPSSKTKD  
LGHNDKSSTPGLKSNTPTRNDAPTPTGTTTTPGLRSMGKPPGMDPIGIMASALRTPISITSSYAAPFAMM  
SHHEMNGSLTSPGAYAGLHNIIPPQMSAAAAAAYGRSPMVSFGAVGFDPHPPMRATGLPSSLASIPGGK  
PAYSFHVSADGQMOPVFPFDALAGPGIPRHARQINTLSHGEVVCAVTISNPTRHVVYTGKGCVKIWDISQ  
PGSKSPIQLDCLNRDNYIRSKLLPDGRTLIVGGEASTLTIWDLASPTPRIKAELTSSAPACYALAI SPD  
AKVCFSCCSDGNIAVWDLHNQTLVRQFQGHDTGASCIDISHDGTGLWTGGLDNTVRSWDLREGRQLQOHDF  
TSQIFSLGYCPTGEWLAVMESNVEVLHHTKPKDKYQLHLHESCVLSLKFAYCGKWFVSTGKDNLLNAWRT  
PYGASIFQSKESSVLSCDISADDKYIVTGS GDKKATVYEVY

AUG initiation = 83.4 kDa  
CUG initiation = 88.7 kDa

+++++

## #24

### NM\_002250

GUG/CUG initiated extension conserved in mammals (AUG in *Pteropus vampyrus*)

**KCNN4 potassium intermediate/small conductance calcium-activated channel, subfamily N, member 4**

Synonyms: IK1; SK4; KCA4; hSK4; IKCA1; hKCa4; KCa3.1; hKCa1; KCNN4

GTCCTTCGGTGTCTGGGTGTGGTGTGAGTAGAGGTGTGTGTGCACAAAGTACAGACCATTGTGTGTGACAAAGC  
CCATCGTGTGTCTGTGTGTGTCTTTATCCACGTGGATGGACGTCTCTTTCTTGCTCTGCCCAAGACACAC  
CCTAGCCCCCTCCTTATTCTCAAAGGGGGAGCTGGGGAGCCTCCCCCTACCCTGGGGCCTCCCCCTGCCCT  
CCCCGCCCTGCCTGGCCGTCACTACTCCCCAGAGGGCAGGGGCTCTGCTGTGCCTCAGAGCAAAAGTCCC  
AGAGCCAGCAGAGCAGGCTGACGACCTGCAAGCCACA GTGGCTGCCCTGTGCGTGTGCGAGGTGGGGGAC  
CCTGGGCAGGAAGCTGGCTGAGCCCCAAGACCCCGGGGCCATGGGCGGGGATCTGGTGTCTGGCCTGGGG  
GCCTTGAGACGCCGAAAGCGCTTGCTGGAGCAGGAGAAGTCTCTGGCCGGCTGGGCACTGGTGTGCTGGCAGG

AACTGGCATTGGACTCATGGTGTGCATGCAGAGATGCTGTGGTTTCGGGGGGTGTCTCGTGGGCGCTCTACC  
TGTTCCCTGGTTAAATGCACGATCAGCATTTCCACCTTCTTACTCCTCTGCCTCATCGTGGCCTTTTCATGCC  
AAAGAGGTCCAGCTGTTTCATGACCGACAACGGGCTGCGGGACTGGCGCGTGGCGCTGACCGGGCGGCAGGC  
GGCGCAGATCGTGTGGAGCTGGTGGTGTGTGGGCTGCACCCGGCGCCCGTGCGGGGCCCGCCGTGCGTGC  
AGGATTTAGGGGCGCCGCTGACCTCCCCGAGCCCTGGCCGGGATTCTGGGCCAAGGGGAAGCGCTGCTG  
TCCCTGGCCATGCTGCTGCGTCTCTACCTGGTGCCTCCGCGCCGTGCTCCTGCGCAGCGGCGTCTGCTCAA  
CGCTTCTACCGCAGCATCGGCGCTCTCAATCAAGTCCGCTTCCGCCACTGGTTTCGTGGCCAAGCTTTACA  
TGAACACGCACCCTGGCCGCTGCTGCTCGGCCTCACGCTTGGCCTCTGGCTGACCACCGCCTGGGTGCTG  
TCCGTGGCCGAGAGGCAGGCTGTTAATGCCACTGGGCACCTTTCAGACACACTTTGGCTGATCCCCATCAC  
ATTCCTGACCATCGGCTATGGTGACGTGGTGCCTGGGACCATGTGGGGCAAGATCGTCTGCCTGTGCACTG  
GAGTCATGGGTGTCTGTGCACAGCCCTGCTGGTGGCCGTGGTGGCCCGGAAGCTGGAGTTTAAACAAGGCA  
GAGAAGCAGTGCACAACCTTCATGATGGATATCCAGTATACCAAAGAGATGAAGGAGTCCGCTGCCGAGT  
GCTACAAGAAGCCTGGATGTTCTACAAACATACTCGCAGGAAGGAGTCTCATGCTGCCCGCAGGCATCAGC  
GCAAGCTGCTGGCCGCCATCAACGCGTTCCGCCAGGTGCGGCTGAAACACCGGAAGCTCCGGGAACAAGTG  
AACTCCATGGTGGACATCTCCAAGATGCACATGATCCTGTATGACCTGCAGCAGAATCTGAGCAGCTCACA  
CCGGGCCCTGGAGAAACAGATTGACACGCTGGCGGGGAAGCTGGATGCCCTGACTGAGCTGCTTAGCACTG  
CCCTGGGGCCGAGGCAGCTTCCAGAACCCAGCCAGCAGTCCAAGTAGCTGGACCCACGAGGAGGAACCAGG  
CTACTTTCCCCAGTACTGAGGTGGTGGACATCGTCTCTGCCACTCCTGACCCAGCCCTGAACAAAGCACCT  
CAAGTGCAAGGACCAAAGGGGGCCCTGGCTTGGAGTGGGTTGGCTTGGCTGATGGCTGCTGGAGGGGACGCT  
GGCTAAAGTGGGTAGGCCTTGGCCACCTGAGGCCCCAGGTGGGAACATGGTCACCCCACTCTGCATACC  
CTCATCAAAAACACTCTCACTATGCTGCTATGGACGACCTCCAGCTCTCAGTTACAAGTGCAGGCGACTGG  
AGGCAGGACTCCTGGGTCCCTGGGAAAGAGGGTACTAGGGGCCCGGATCCAGGATTCTGGGAGGCTTCAGT  
TACCGCTGGCCGAGCTGAAGAAGTGGGTATGAGGCTGGGGCGGGGCTGGAGGTGGCGCCCCCTGGTGGGAC  
AACAAAGAGGACACCATTTTTCCAGAGCTGCAGAGAGCACCTGGTGGGGAGGAAGAAGTGTAACTCACCAG  
CCTCTGCTCTTATCTTTGTAATAAATGTTAAAGCCAGAA

VAALCVLRGGGPWAGSWLSPKTPGAMGGDLVVLGLGALRRRKRLLEQEKSLAGWALVLAGTGIGLMVLHAEM  
LWFGGCSWALYFLVKCTISISITFLLLLCLIVAFHAKVQLFMTDNGLRDWRVALTGRQAAQIVLELVVCGL  
HPAPVRGPPCVQDLGAPLTSPPQWPWPGFLGQGEALLSLAMLLRLYLVPRAVLLRSGVLLNASYRSIGALNQV  
RFRHWFVAKLYMNTHPGRLLLGLTLGLWLTTAWVLSVAERQAVNATGHLSDTLWLIPITFLTIGYGDVVP  
TMWGKIVCLCTGVMGVCCTALLVAVVARKLEFNKAEKHVHNFMMDIQYTKEMKESAARVLEAWMFYKHTR  
RKESHAARRHQKLLAAINAFRQVRLKHKRLREQVNSMVDISKMHMILYDLQNLSSSHRALEKQIDTLG  
KLDALTELLSTALGPRQLPEPSQSK

Probability of export to mitochondria = 0.4881  
AUG initiation = 47.7 kDa  
GUG initiation = 50.1 kDa

+++++

## #25

### NM\_004494

GUG initiated extension conserved in mammals

**HDGF hepatoma-derived growth factor (high-mobility group protein 1-like)**

Synonyms: HMG1L2; FLJ96580; DKFZp686J1764; HDGF

GAGGGAGGAGGAGGAGTGGGGACCGGGCGGGGGTGGAGGAAGAGGCCTCGCGCAGAGGAGGGAGCAATTG  
AATTTCAAACACAAACAACCTGCACGAGCGCGCACCCACCGCGCCGGAGCCTTGCCCCGATCCGCGCCCGCC  
CCGTCCGTGCGGCGCGCGGGCGGAGACGCCGTGGCCGCGCCGGAGCTCGGGCCGGGGCCACCATCGAGGC  
GGGGCCGCGCGAGGGCCGGAGCGGAGCGGCGCCGCCACCGCCGCACGCGCAAACCTTGGGCTCGCGCTTCC  
CGGCCCGGCGCGGGCGCCCGGAGCCCGCATGTCGCGATCCAACCGGCAGAAAGGAGTACAAA  
TGCGGGGACCTGGTGTTCGCCAAGATGAAGGGCTACCCACACTGGCCGGCCCGGATTGACGAGATGCATA  
GGCTGCCGTGAAATCAACAGCCAACAAATACCAAGTCTTTTTTTTTCGGGACCCACGAGACCGCATTCTGG  
GCCCCAAGACCTCTTCCCTTACGAGGAATCCAAGGAGAAGTTTGGCAAGCCCAACAAGAGGAAAGGGTTC

AGCGAGGGGCTGTGGGAGATCGAGAACAACCCTACTGTCAAGGCTTCCGGCTATCAGTCCTCCCAGAAAA  
GAGCTGTGTGGAAGAGCCTGAACCAGAGCCCAGCTGCAGAGGGTGACGGTGATAAGAAGGGGAATGCAG  
AGGGCAGCAGCGCAGGGAAGGAAGCTGGTCATTGATGAGCCAGCCAAGGAGAAGAACGAGAAAGGAGCG  
TTGAAGAGGAGAGCAGGGGACTTGCTGGAGGACTCTCCTAAACGTCCAAGGAGGCAGAAAACCTGAAGG  
AGAGGAGAAGGAGGCAGCCACCTTGGAGGTTGAGAGGCCCTTCTATGGAGGTGGAAAAGAATAGCACCC  
CCTCTGAGCCCGGCTCTGGCCGGGGCCTCCCAAGAGGAAGAAGAAGAGGAGGATGAAGAGGAAGAGGCT  
ACCAAGGAAGATGCTGAGGCCCCAGGCATCAGAGATCATGAGAGCCTGTAGCCACCAATGTTTTCAAGAGGA  
GCCCCACCCTGTTTCTGTCTGTCTGGGTGCTACTGGGAAACTGGCCATGGCCTGCAAACCTGGGAACC  
CCTTTCCACCCCAACCTGCTCTCCTCTTCTACTCACTTTTCCCACTCCAAGCCCAGCCCATGGAGATTGA  
CCTGGATGGGGCAGGCCACCTGGCTCTCACCTCTAGGTCCCATACTCCTATGATCTGAGTCAGAGCCATG  
TCTTCTCCCTGGAATGAGTTGAGGCCACTGTGTCTTCCCTTCCGCTTGGAGCTATTTTCCAGCTTCTGGG  
GCCTGGGACAACCTGCCACCTCCTGACACCTTCTCCCCTCCTAGGCATTCTGGACCTCTGGGTTG  
GGATCAGGGGTAGGAATGGAAAGGATGGAGCATCAACAGCAGGGTGGGCTTGTGGGGCCTGGGAGGGCAA  
TCCTCAAATGCGGGGTGGGGGCAGCACAGGAGGGCGGCCTCCTTCTGAGCTCCTGTCCCCTGCTACACCTA  
TTATCCCAGCTGCCTAGATTAGGGAAAGTGGGACAGCTTGTAGGGGAGGGGCTCCTTTCCATAAATCCTT  
GATGATTGACAACACCATTTTTTCTTTTGGCGACCCCAAGAGTTTTGGGAGTTGTAGTTAATCATCAAGA  
GAATTTGGGGCTTCCAAGTTGTTCCGGCCAAGGACCTGAGACCTGAAGGGTTGACTTTACCCATTTGGGTG  
GGAGTGTGAGCATCTGTCCCCCTTTAGATCTCTGAAGCCACAAATAGGATGCTTGGGAAGACTCCTAGCT  
GTCCTTTTTCTCTCCACACAGTGTCAAGGCCAGCTTATAGTCATATATATCACCCAGACATAAAGGAAA  
AGACACATTTTTTAGGAAATGTTTTAATAAAAGAAAATTACAAAAAATTTTTAAAGACCCCTAACCT  
TTGTGTGCTCTCCATTCTGCTCCTTCCCCTCGTTGCCCTTCTGAGGTGCACTGGGAGGCTCCCCTT  
CTATTTGGGGCTTGTGACTTTCTTTTGTAGCTGGGGCTTTGATGTTCTTCCAGTGTCAATTTCTCATCC  
ACATACCCTGACCTGGCCCCCTCAGTGTGTCACCAGATCTGATTTGTAACCCACTGAGAGGACAGAGAGA  
AATAAGTGCCTCTCCCACCTCTTCTACTGGTCTCTCTATGCCTCTCTACAGTCTCGTCTCTTTTACCC  
TGGCCCTCTCCCTTGGGCTCTGATGAAAAATTGCTGACTGTAGCTTTGGAAGTTTAGCTCTGAGAACCCT  
AGATGATTTTCAAGTTCTAGGAAAATAAAACCCGTTGATTACTATAAAAAAAAAA

REEEEWPGGGWRKRPRAEEGAIEFQTQTTARARTHRA GALPR SAPAPSVRRAGGDAVAPELGPATIEA  
GAARGPERSGAATAARANLGSRF PARRGARGARSPAMSRSNRQKEYKCGDLVFAKMKGYPHWPARIDEMPE  
AAVKSTANKYQVFFFGTHETAFLGPKDLFPYEESEKEKFGKPNKRKGFSEGLWEIENNPTVKASGYQSSQKK  
SCVEEPEPEPEAAEGDGDKKGNAEGSSDEEGKLVIDEPAKEKNEKGALKRRAGDLLEDSPKRPKAEENPEG  
EEKEAATLEVERPLPMEVEKNSTPSEPGSGRPPQEEEEEEDEEEEA TKEDAEAPGIRDHESL

AUG initiation = 26.8 kDa  
GUG initiation = 31.6 kDa

+++++

## #26

### NM\_013313

ACG initiated extension conserved in vertebrates – in humans three of the four paralogs have the ACG extension

#### YPEL1 yippee-like 1 (Drosophila)

Synonyms: FKS3; MGC64992; YPEL1

CAGGCGGCCCGCGGGGCGGCGGGGAGGATGCCTCGCGCCTGCCTAGGCGTTAACGGCCTCAGCGCGTC  
CCGGGCCCGCGCCGGGAACGCCTGAGAGCCGAGCCCGCGCTGACCGGGGCCCGGGCCGGATGGGCGCTGCGG  
GCCGGGGCGCGGACCGCGGAGCGGCCGTTACGTTTTTCTCTCGTCCCAGCTGTGTGGACAGTGCCACACGC  
CCTCCTGGACAACGACCGCTCTTGCCTGCAATTTCCAGTGTGCTTTTGTGTCAGAGAGGCCAGCAGAGCCAC  
GGTTCTTCCAGAACCAGCCCTGAGCTGAGTGAGGAGTGCCAGGAGAGATGGTGAAAATGACAAAGTCCAA  
AACTTTCCAAGCGTATCTGCCGAACGTGTCACCGAAGTACAGCTGTATCCACTGCAGAGCACACCTGGCCA  
ATCATGACGAGCTCATCTCCAAGTCTTTCCGGGAGCCAGGGACGCGCCTACCTCTTCAATTCCTGGTG  
AACGTGGGCTGCGGCCCTGCAGAGGAGAGGCTCCTTCTCACCGGGCTGCATGCGGTTGCCGACATCTACTG  
CGAGAACTGCAAGACCACGCTCGGGTGGAAATACGAGCATGCCTTTGAGAGCAGTCAGAAATATAAGGAAG

GAAAATTCATCATTGAGCTTGCTCATATGATCAAAGACAATGGCTGGGAGTAA TGTGCGAACTTTCCCTTC  
TCCTTTGAATGCTGTTTTGTGAAAGAACTGTGAATGTAATGGAAACGTAGGAGCATCTGGTGACAGCCTT  
TCTTGGCCTCTGACCTCAAAGGCTAGCTGCGCATAGCTCTTGACACTCTCGGCCATCTCTGTGGGTAAGGT  
GTCCCTCGGATCTGTCTCTTCGTGTACACAGTTGTTTCTGAAAATTTTCAATGAGCTTTTTCTAACTTCT  
CAAGTTCTAGAGAAAAGAAATTAACCAACTGATGACTTACCTGCCTAGTTAATATCTTCTTTTACCTTTGTC  
TTCAATATAGTTGGGCTCTGCTTTTTTAAGGTTTCAAGTTGAAAACCAAACCTGGGGCCGGGTGCGGTGGCTCA  
CGCCTGTAATCCCAGCACTTTGGGAGGCCAAGATGGGTGGATCACCTGAGGTCAGGAGTTCTAGATCAGCC  
TGGCCAACATGGTGAACCCCATCTCTACTAAAAATACGAAAATTAGCCGGGCATGGTGGCGAGTGCCTGT  
AATCTTAGCTACTCAGGAGGCTAAGGCAGGAGAATCACTTGAACCTGGGACACGGAGGTTGCAGTGAGCTA  
AGATCATGCCATCGCACTCCAGCCTGGGGGACAAAAGTGAGACATCGTCTCAAAAAAAAAAAAAAAAAAGTG  
GGTATGGTGGCGCATGCCTTTAATCCCAGCTACTCGGGAGGCTGAGGCACGAGAATCACTTGAACCCAGGA  
GGCGGAGGTTGCAGTGAGCCAAAGATCGCGCCACTGCACCTCCAGCCTGGCAATAGGGCGAGACTCCGTCTCA  
ATTTAAAAACAAAAGAGAACCAGACTGAGTCTCTGAAGACCACAGGGACAGGGTCTCTTTAGATAGCAAGTC  
TCACCATTCCCTTTTTTAGAGAAAAGGTATTGTAGCCACCCTCCACCCGCTGTTTTTCTTAAATTTGCA  
GAACTTCAAATTTGGCTATTCTCTTGCAAATGAACCTTAAAGTACAGTGTTATTTAAGAATCTTCCAGAG  
GCAGTCAACAGACTTATACTAAGGGCATTTTTTGGTTTTTAGCTTGTTCAAAAACAGAGGCCAGCACAGA  
TGACATTTTAGATACACTCTAAATTTGAGAATGGTGTCTAGTGGAACATGTTTATTTAAGCCAGTAGATTCC  
TTATCTAGAAAAGCAGGTGAGCTAGCCCTTAGAGAAGGCTGTCCCGGGGCCGAGAGGTGCCCTTACTGAG  
GTGACAGCCTCACAGGGTCTGGTACCAGGGGTTGTGCCCTCAGCAGTGACAGCAGCTTAGGTGTCAGGCAG  
TTGCTGAGTGGCTGGTCCATGTCTATAGAGTAACACACTGGACCGAGGAAAAGTCAGATTTTCATTTTCTAC  
CCTGGATGTACTTTGAAGAAAAGAATTATTTTTGCATATGAAAGAGGCCAGAACCACAGGAAAACCTTCA  
AACTTTGACATTTGCCAGAATGTTTAAATTTGTTTCAAAAAGGTTAAAGCAACAAGTTTAGCCTTTGTGC  
ATGAAGACGCCTGGCCTGCTAGACGCGTTGCCCGTCCCTGCGTGGTGTCTGCCATGTCACTTGAACCTGAT  
AGAGGGGCTGTGCAATCTCCTAAGGCCTGTGTTTTCTGCCATATATTTTTATTATAAATTACAATCCACTCA  
TCCACCTGCCCTCCACCAGGAGTGGGCACCCATAAGGGTTTAGGCCACTTTGCAGAGGATGGAGGTCAA  
AACCCTCCAGATAAGTTTGGTTTTCAACATTTAGTAACTTGTCTCAGGGCAGAGGGCAGGCAGGGGGAC  
CGAGGGGCAGCAGATAGGAGAGCACTGAGCCCGGATAGTTCTCAGCCTGGCAAGTGGCTCTGAAGCTGCCT  
TCAGACAAGGCTAGTCTAGGGGCAAGAGTGCAGCTGGCTGACAATAAGAACGTGGCCACCTGCCAGCTT  
CACACTCCCCGACTTCCAGCCCTTCTTAAACCCAGACTGCGGTCCAGGCAGGCAGGCAGCTGTGCCAC  
TCAGACTCACTGCCACACAGCATGCCTTTGGGTGCCATCTCTTTGCCCAAGCCTGGAAGCCTTTGGCAG  
GTGGGAAATGCCGCTGCCCTGGTGGGCATGGCACTGAGATGCATCCACTCAGCAGGAGTGACAGAGGCAGA  
AGTTCTTTTAAAGCACATCTTCCACTTAGGAAAGGAAGGAAATCTTTGTACTGTCTTGAAGCCTCCACAT  
CCGGCTATGGCCCTGCAAGCTGCTTTATCCCTGCGCTAGTCTCCCCCGAGGGTTTTAGGCTGGCCCAGCACA  
TCCTGTCTCTGAGCTCGCGTGCAGCCACCCAGAGCGCAGGGGTCACTGCACGCTGCAGGGCTCTTGCTG  
CCATGGTCTCAAGCCTGAAGAGGCTCCGCCACAAGCTGGCCCATGAAGTTAGCAATGCCTGTGGCTTCCAG  
TCAATTGTCTTGAGACTGTGAAGAGGCTGAAAGACACCTTCCCGGGTGAAGAAGGAGTTCACTGAAAAC  
TATCTTAAACTGACCCTTCCCTTTGAGTGAGTCTTCACTTCTCTCCATGTGGGAACCCAGCCTCCGATGC  
CCCGGGGACTAGGGGAAACAGTTGGAGGTTCTGTCCTGCCGTCAGCCTGCCACGGGTGCGAGGACAGCCAAG  
TCCTGAGTGACTCAAGATGCTTCACTTACATGGAAGAACTTCTAAAACCTTACCAGTGGTTTTTTGTATA  
TACTAAAGTTCTATTTAGAGCTTTTTCTGTTTTGGGCAAGTTCGCTGCTCCTTCTATTTGGGCACCTTTGGTT  
TTTGTACTGTCTTTTTGTGACGGCATTGATTGAACATTTTTTACTAGTAGTCTTATGACTTTTTGTATTTTT  
TTTTTTTTTTGTAATTTATACCAACAACACTTTTTATCACTTTTTTTTTTTGTTGGGCTTCTGCAAAATACAAGC  
TCATTTTTTAAACCAAATGAACAGACCATGAGCTGGCTTCCAGGGGAAGTGCTATTACAGGACCATATCCAC  
CACCTCTTAAATTCCTAAACAATATCATCTAGGACTTCTATTTAAGTTATTTAAAATAAATCTTCCCTTGA  
GAGCCTTGGGAGGTGATGTGAGGTTATAAATGGCACAGTGCATTTGCTGTAGGAATGTGGTTTTGGCATTG  
TTTTATAACACACAGTATTTTTTATACCTTAATGCTTATTTCTTGATGGCATCTGTGAGATATTAGAATTGAA  
AATAAGAATCTTCCCAAAATCCTTTAATTTACCTGATGCCCTCATCAGGTCGTTAAAATTTCAAATGGTTTT  
TAATAGCTAAAAACTACAATTAAGCTCTAAAACAAACAACTACAGAAATGTAAACCTTCAATTTGCCAA  
AGGTCTTGGTGGCCTGTCCCCTGCCCTGGGAGCAGATGGCCCTGAAGCCCTTCCCTCACTGTGCAGGCCA  
CCGGGTGAGGCTGGACGGTCAACCATGGTGGCTTCACTGCAAGGAGCAGGACTGCCGAGCTCAAGCACGGG  
GCCTTCACTTCCCCTGTCTCTGGCCACACCGCCAGCCCTTGGTCCTTATCTGTGTGAGGTTTACAAATA  
AAGCTTCTGATGTCAAATGTTTAAAAAAAAAAAAAAAAAAAAA

TALACIFQCCFCQRGQOSHSSRTSPELSEECPEMVKMTKSKTFQAYLPNCHRYSIHCRAHLANHDEL  
ISKSFQGSQGRAYLFNSVNVVCGPAEERVLLTGLHAVADIYCENCKTTLGWKYEHAFFESSQKYKEGKFI  
ELAHMIKDNGWE

PROBABILITY of export to mitochondria: 0.5853 with extension  
PROBABILITY of export to mitochondria: 0.5239 w/o extension

13.6 kDa from the AUG codon  
17.3 kDa from the AUU codon

+++++

## #27

### NM\_022106

AUA initiation conserved in mammals

C20orf177 chromosome 20 open reading frame 177

Synonyms: dJ551D2.5; C20orf177

TCAGCTCAGCCAGGGAGCTCAGCGGAGCTGCGCGCCTCCGCCTCCAGCTCCCCTGCCGCAGCGCGCCGCAG  
CCGGGCGTCCCCGCGCGGGCGCCGGAGAGGAAGGAAGGCTGGCAGCCTCGTACGTGTCCGCTGCAGTCGC  
GAAACAGTTCGGTGGTGAGGAGACCTTTCCAATATAAGAGGAATAAGAAGTCACCTCCCCAGCTGTCA  
TCATCTCCAGCAGATTGACCAAGAATTTTTGAGCACTACAGGAAAGACAGTCCATCAAACCCGAGATGA  
TGATCAGCCACGTGATTTTTCAAGAAGAGGAATAGGGTGAATGAATCTCATCAGAAAAGCAGCAATATGA  
ATGCTGGCCCATCTTGGAAATAAAGTGCAACATTCAAAGAATTCTTCAGGAAAAAGGCAGAGTAAATCCCAA  
GTACCCACGCTTCTTCCAGCCGAGAAGCAGCCTCACAGCTGTCAACCAGCCTACTGAAGAAAACTTAA  
AGAAAGCATTTCGCCGAAGCAAGACGCAAAAGGAATCCACTCGGTTCCAGGTGTGAGGGGGCCTCAGGGA  
ATAAACTGTTTCTTGATTTTCAGTCAATGAAAATTATTAAGAGAATGCTGATGAGGACAGTGCAAGTGAT  
CTCTCTGATTTCGAAAGAATTCCCATTCCTCCTTCTCCCCTCACACCTCCAGATCTCAATCTTCGAGCTGA  
AGAAATTGATCCAGTTTACTTTGATCTTACCCTGGTCAGGGCCATACAAAACCTGAATACTATTATCCTA  
ATTTCTTCCATCCCCTTTTCAGCTCCTGGGACCTACGAGATATGGCCCTGCTTCTGAACGCAGAGAACAAA  
ACGGAAGCCGTGCCCGAGTGGGAGGACTTCTTGGGAAGTATATCGATAGACTTATTTCAGCTTGAGTGGCT  
GCAAGTCCAGACTGTACAGTGTGAAAAAGCAAAGGGGGGCAAAGCAAGGCCCCCTGCCCCTGGGACCT  
CAGGGGCACTGAAAAGCCCTGGGAGAAGTAAGCTAATTGCTAGTGCTCTGTCCAAGCCACTACCTCACCAG  
GAAGGGGCTTCAAAGTCAGGCCCTTCCGAAAGAAAGCTTTTACCATGAAGAAATCCACCCATCACATTA  
TGCATTTGAGACTTCCCCTAGACCCATTGATGTGCTTGGTGGTACCAGGTTTTGTTCTCAGAGGCAAACCC  
TTGAAATGAGGACAGAAGAAAAGAAAAGAAATCAAGTAAGAGTACGAAGCTGCAGCGCTGGGATCTGTCC  
GGCAGTGGAAAGCAGCTCTAAGGTGGAAACCAGCGGTACATTCAGATTCCCAAACAGGCAGCTGTGATTCT  
GGACTCAGCAGATTCTGTAAAGCCCTCCAAAACACAAGCACATGCACATCCTAGGAAAAAGGAAAGGCAG  
AGAGCTGTGGTTCATGCCACTGTATCGAGTGAGAAAAAACTGAAAACAAACGGAGTAAAGCAAAACACATAT  
AAACTAAAAATAATCTAAAATGCTGAATTTGCCAAGACCTGCAGGTACCTCAATGTTAGAGCGCTTTCCAA  
AAGTCAAATACTGTGAATTTTAAGGAATTTTACAATACTGACATTTAAGTAGTTGACTGGCATTTTTGT  
CCACCTTTATTTCTACCCTGAGTGGGGTTATTTTCAAAGGAAGTGTCTTTCAATAAGCCTTTCTTTGTAT  
TGTCAGTCTTAGGCAAATGAGAGCCCTTTAGATAAAAATTATGTAATAATATGTCCATATAAAGGAATAAA  
ATGGCACCTCTCCAGGAAAGTGTGAGTAAACCTCAGCTACAGTAGCCGGTCTGTGTAGAGCAGCTAGTG  
GTGTTACCTCCCCATTTTACATGCACGTAAGTATATGAAATAGTGCAGACTGTTTCAAATGGTGTGGAAT  
CCTAAATGTTTAAATAAGGTCTTCTTGCCCACTCCCTCGCTTACTTTTTTATAAACTCCTCAAGCAAAA  
TTTTCTGTTCATTTTACCCTTAGGAGAAGCTTTAGTTCTTCTCAAGTCAGGGAGTAGTGAGTTTGTATTTT  
GAGTAGTCATTTCTACTAAGCTGGTTGCTTTCTAGAGAGACAGTGGAAATCTAGTACTTTAATACATTTTC  
TCTGACATGGTTTTTTTTTTTTTTTTTTTTGAGGGGCATTTTAACTTAGAGGTGGTGGTAAAACCTACTTTTG  
AGTTCTCCGAAGTGAAGTTAAAATAACTTGCAGAATTTTCAAAGTCAATGGGCTTAGCATGATTACTGCT  
GTTTGGTGGGGCTGAGAATGAAATATTTGACATTCTGGAATTGCTGGCATGTAAAGCTTCTCCAGAGAGGC  
ACCCAGGGAATCACTCTTACAATTTGTAAGGAAGGGCCTGTAAGGATCAAACACATGGACCTAC  
ATTCAGTGAATAGTTACAAAGTTACTGATTTGGGTTCCACACCCTGTGGTCTTAGTCAAAAATAATGAT  
CTGTTTCAGTTTGAAGAGCAGGATTTTATTATTTTGCTTGGGGTGAGGGGCGGGAGAGTGGAATATGAGT  
AAGGTTGCTGAATGAATTCTAAACTCGCTTATCTGGTCTTCAGGCTTCCCAACTCTCTCCAAGCCTTCTTA  
TTTCACTGCAGTTAAATAACATCTTCTGTTCTATAGTTGTGCTGTGAGTTTTCTGTTTCAATTTTGC  
GTGATTTTAAATACGGCCCATGTCAATTATAGTTGATTTTATCCCTTTAAACAATTACTGTATTTGTTTTG  
ACGTAGAGGTTTTCAATTTTTTACCTTGGGGCAAATGAAAACTTGGCATTTTTTCATTTGGGAACATATA



ACCTCCCTTATGTAGTTGAAATATCTAGCTAACTTGGTCTTTTTTCGTTGTTTGTGTTTTACTCCTTTCCCTC  
ACTTTCTCCAGTGTCAACTGTTAGATATTAATCTTGGCAAAGTCTTAATCTTGTGGATTTTTGTAGATGG  
TTTCAAATGACTGAACTGCATTACAGATTTACGAGTGAAAGGAAAAATTGCATTAGTTGGTTGCATGAACTT  
CGAAGGGCAGATATTACTGCACAACTGCCATCTCGCTTCATTTTTTTAACTATGCATTTGAGTACAGACT  
AATTTTTAAAATATGCTAACTGGAAGATTAACAGATGTGGGCCAACTGTTCTGGATCAGGAAAGTCAT  
ACTGTTCACTTTCAAGTTGGCTGTCCCCCCCCGCCGCCGCCCATATGTACAGATGATAATAGGG  
TGTGGAATGTCGTAGTGGCAAACATTTACAGATTTTTATTTTGTGTTCTGTCTTCAACATTTTTGACACT  
GTGCTAATAGTTATATTAGTACATGAAAAGATACTACTGTGTTGAAAGCTTTTTAGGAAATTTTTGACAGT  
ATTTTTGTACAAAACATTTTTTTGAAAAATACTTGTAAATTTATTCTATTTTTAATTTGCCAATGTCAATA  
AAAAGTTAAGAAA

LDATSPPSVFGAEIAKTEGLEMADHMMAMNHGRFPDGTNGLHHPAHRMGMGQFSPHHHQQQPQHAFNA  
LMGEHIHYGAGNMNATSGIRHAMGPGTVNGGHPPSALAPAARFNNSQFMGPPVASQGGSLPASMQLQKLNN  
QYFNHHPYPHNHYMPDLHPAAGHQMNQTNQHFRDCNPKHSGSSTPGGSGSSTPGGSGSSSGGGAGSSNS  
GGGSGSGNMPASVAHVPAAMLPPNVIDTDFIDEVLMSLVIEMLDRIKELPELWLGQNEFDFTDFVCKQ  
QPSRVSC

AUG initiation = 28.5 kDa  
CUG initiation = 30.6 kDa

+++++

## #29

### NM\_182603

CUG initiated extension conserved in mammals but maybe not in Arfotheria (mouse, dog, orangutan, cattle, etc, have delimiting upstream in-frame stop codon).

#### ANKRD42 ankyrin repeat domain 42

Synonyms: SARP; FLJ37874; ANKRD42

GCGACGGCCCTGCTGCCTCTCCAGCCAAGTGGCTGGAGTCGGGAGGCTGGAAAGAGACTCCGAGAAAGTAC  
CAGCGGAAGGCGGCCCGCTACGGCGATTTCGAGGGAGTAGCAGACGAAGACGGTGGCCGCCGACTAGC  
CACCACGTGTGGAGGATAAACGGTCTACACGGCCATTCCGGCGCCGAGTCTAGGGAAGAGTTAGCGACGA  
CGGGGAAAGAAAATGTGAAGAGAGCGACCCCGCTCCAGGGTCGCTGCAGGAAGCCTAAGTGCAGACGCCG  
GCTTCTCCGCGAGTGACTTGAGAAGGGTCAGTGAAAACCTCGGCCACTGCCGACGCTCTCTAGGGAGAGA  
GTTAGGGGAGATAGTGGCCACAGTCACAGCTGCTCTTGGGAGAGAGTTAGGGGAGACAGCACCTTCTGCAG  
CAGCGACGTGAATTTTGTGAAGTTGGAGGCCACCAAACCTACCGACTCCAGGGGAACAGCCAGAGAAGACC  
GAGGCCTCCGCCTCAGTGGTCCTTGGGAGGGAGTCACTGACATTCCGGACCCGCGAAGTGTGACTTCGGG  
GATAGAGTCACTGACGATCGCAGTCGCCGCTTTCAGTGGCTCCTGGGAGGGAGGGAGTGTGCAAGGCGGCCA  
CAGCGTTGGTAGTTCTTGGGAGGAAGTAAGTGGAGACCGCGCTACGCAGCCAGCGACTCCTCTGGTGTGA  
GCGGCAGTGAAGACGCCAGCTACCGCTTTCAGTGGCTTTTGGGAGAGAGAAAGTGAAGACGAAGTTTCCGC  
TGCAGCTTCTGGGAGAGAGCAAGAGAGGACCTTGGGCCCCGTCCTAGTGACGACGGAGAAGAGGGCCGCTG  
CCGCTGCAGTGGCTCGTGGGTGAGAGCAAGTGAAGACCGCCGACGATCAGGGGCCTGGACTCAACTCCTC  
CCCAGAGTCCGAGGTGTTGCGCCATGCCCCGGGTGGCCAATTCAGGCCCTCCACTTCTCTAGGGGAGACT  
GCAAACCCCTGTTCCAGGAAGAAGGTGCATTTTTGGCAGCATAATGATGCAGTACGAGCTGGAGATGTA  
GCAGCTTTCAGAAATAGTGTGCTTTCATTGGCTGCTCTGGCATGGAGCTGATATCACACACGTAACAACGA  
GAGGTTGGACAGCATCTCACATAGCTGCAATCAGGGGTGAGGATGCTTGTGTACAGGCTCTTATAATGAAT  
GGAGCAAATCTGACAGCCCAGGATGACCGGGGATGCACTCCTTTACATCTTGTGCAACTCATGGACATTC  
TTTCACTTTACAAATAATGCTCCGAAGTGGAGTGGATCCCAGTGTGACTGATAAGAGAGAATGGAGACCTG  
TGCATTATGCAGCTTTTCATGGGCGGCTTGGCTGCTTGCACCTTCTTGTAAATGGGGTGTAGCATAGAA  
GATGTGGACTACAATGGAACCTTCCAGTTCCTTAGCAGCCATGGAAGGCCACCTTCACTGTTTCAAATT  
CCTAGTCAGTAGAATGAGCAGTGCAGCGCAAGTTTTAAAAGCTTCAATGATAATGGAGAAAATGTACTGG  
ATTTGGCCCAGAGGTTCTTCAAGCAGAACATTTACAGTTTATCCAGGGGGCTGAGTATGGAAGAAAAGAC  
CTAGAGGATCAGGAAACTTTAGCATTTCCAGTTCATGTGGCTGCCTTTAAGGGTGATTTGGGGATGCTTAA  
GAAATTAGTGAAGATGGAGTAATCAATATTAATGAGCGTGCTGATAATGGATCAACTCCTATGCATAAAG

CTGCTGGACAAGGCCACATAGAGTGTGGCAGTGGTTAATTAAAATGGGAGCAGACAGTAATATTACCAAC  
AAAGCAGGGGAGAGACCCAGTGTGGCAAAGAGGTTTGGCCATTTGGCAGCAGTGAAGCTGTTAGAGGA  
GCTACAGAAATATGATATAGATGACGAAAATGAAATTGATGAAAATGATGTGAAATATTTTATAAGACATG  
GTGTTGAGGGAAGCACTGATGCCAAGGATGATTTATGTCTGAGTGAAGTGGATAAAAACAGATGCCAGAAGA  
CCATCAAAGAAGTGCAGGGCCAGCTGGAGTATGAACGACTACGTAGAGAAAAATTAGAATGTCAGCTTGAT  
GAATATCGAGCAGAAGTTGATCAACTCAGGGAAACACTGGAAAAAATTCAAGTCCCAAACCTTTGTGGCTAT  
GGTTGGTGTCTCTTTTAAATACATTTATTTTTCTCAAGAAGTATATACAAGAGTGGCCAAGAGTACAAGCTT  
TGGGCTGGGGCTCTTTGGACTTGAATCCTGGCTATAGTCTTTTTTGGATTTGGGCTACTCATTTAACCTTTT  
TGTGCCTCAACTATAAACTGGAGATGATAACTTATACTTTCTAGAGCTGATGACAGGATTAAGGAATACA  
CACACACACACACACACACACACACACACACTCTATATGTAACATAACTTTCTAGATACATACA  
CACACTGTCTATCTTCTTCAAACAGCAGCCTAGTTCTATAAGTATTATTGTTAACATTTGTACCATAGAAG  
GAGAAAATGTTTTCTATAAGTAATCAATCAGAATTCTAAGACAGCTAGAGGATATGTATATTTTAAATTTCT  
AAATAACCAAAATAAAGTGCTTTGAATGGAATCCATATTTTCTTTCCATAGGGAAGTTTCTTCATCAATCA  
TCATGGATGAATTAATTCTGTTTGGAGCTTGTGTACCTCAAATCTGATCTATTAATATTATAGAATCTTC  
CTGGCTTCTTTTTATTTTGCACAACTAGTCACTGGTCTCTTTAATAACCACTTTAAAAATATTTAAATAA  
TAAACATGTTTGTGTATAGTGTAAAAACAAGATAGATGTTCTTCTGACACTAAGTTCCACTCTCCAG  
AGGAAGCTATTGTTAACAATTTAGTACATACCATATTAGACAAAATTCTATTTATCTGCAAACATGTATGT  
GTATTTCTATGCATATGCAAATATAACCACTTCTCAGTTTCTCTGGGTTTTGGTGTCTCACCAGTGGTTG  
ATTTTCCAAGAAATATAATTAACATAATAATT

LERDSEKVP AEGGRRY GDSQGV ADEDGGRRTSHHVWRINGLHGHSGAESRERVSD DGERKCEESDRRSRVA  
AGSLADAGFSRSDLRRVSEN LGHCRSVSRERV RGD SGHSHSCSWERV RGDSTFCSSDVNFSEVGGHQTTD  
SRGTAREDRGLRLSGPWEVSDIRDPRTSDFGDRVSDDR SRRFSGSWE GGSVEGGH SVGSSWEEVSGDRGY  
AASDSSGVSGSEDA SYRFSGFWERESEDEGFRC SFWERAREDLGPRPSDDGEEGRCSG SWVRASEDRRS  
IRGLDSTPPQSRCCAMPGVANSGPSTSSRETANPCSRKKVHFGSIHDAVRAGDVKQLSEIVCLHWLLWHG  
ADITHVTTTRGWTASHIAAIRGQDACVQALIMNGANLTAQDDRGCTPLHLAATHGHSFTLQIMLRSGVDPSV  
TDKREWRPVHYAAFHGRLGCLQLLVKWCSEIEDVDYNGNLPVHLAAMEGHLHCFKFLVSRMSSATQVLKAF  
NDNGENVLDLAQRFFKQNILQFIQGAEYEGKDLEDQETLAFPGHVAAFKGDLGMLKKLVEDGVININERAD  
NGSTPMHKAAGQGHIECLQWLKIMGADSNITNKAGERPSDVAKRFAHLA AVKLLLEELQKYDIDDENEIDEN  
DVKYFIRHGVEGSTDAKDDLCLSDLDKTDARRPSKNCRASWSMNDYVEKN

AUG initiation = 43.1 kDa  
CUG initiation = 76.1 kDa

+++++

### #30

## NM\_014310

CUG initiated extension conserved in mammals.

### RASD2 RASD family, member 2

Synonyms: Rhes; TEM2; MGC:4834; RASD2

TAGGAGCTGCTCCTTCATCACTGGAGTCGCCCCCTACCTCTCTGCCCCAGCCCCGAGAGCCCCAGGCAGGGGA  
CCCCCGGATCGGACGTCCCCAAGCCTCCGGGCACCTGGCTCAGCAGGAGGCCCGGCTCGGGGCAGGGCA  
GGGCCGGCGGGCGAGCCGGAGCCCGCCCCCTGCCGGGCCCGCCGAGCCCTCGGAGCCACCCATGGG  
GCACCTGCCCCCTTGCCTCCTTGCCTGGCCGCGCCAGCCCGGCGTCCCGAGCAGCGCAGGGGAGGATCC  
CCGCGCAGTGACCCGGGAGCCACCACAGACTCTGGGAGGCTCGGCGGCTGGAGCAGCAGCCAGCTCCCCG  
AGCTCCCGGCGCTTCCAGGCAGCTCTCTGAGCCGTGCCAGAGGCCCGGCCATTCCAGCCCCGAGCC  
ATGATGAAGACTTTGTCCAGCGGGAAGTGCACGCTCAGTGTGCCCGCCAAAACTCATACCGCATGGTGGT  
GCTGGGTGCCTCTCGGGTGGGCAAGAGCTCCATCGTGTCTCGCTTCTCAATGGCCGCTTTGAGGACCAGT  
ACACACCCACCATCGAGGACTTCCACCATAAGGTATACAACATCCGCGGCGACATGTACCAGCTCGACATC  
CTGGATACCTCTGGCAACCACCCCTTCCCCGCCATGCGCAGGCTGTCCATCCTCACAGGGGATGTCTTCAT  
CCTGGTGTTCAGCCTGGATAACCGGGAGTCTTCGATGAGGTCAAGCGCCTTCAGAAGCAGATCCTGGAGG  
TCAAGTCTGCTGAAGAACAAGACCAAGGAGGCGCGGAGCTGCCATGGTCATCTGTGGCAACAAGAAC  
GACCACGGCGAGCTGTGCCGCCAGGTGCCACCACCGAGGCCGAGCTGCTGGTGTCCGGGCGACGAGAAGT

CGCCTACTTCGAGGTGTCTGGCCAAGAAGAACACCAACGTGGACGAGATGTTCTACGTGCTCTTCAGCATGG  
CCAAGCTGCCACACGAGATGAGCCCCGCCCTGCATCGCAAGATCTCCGTGCAGTACGGTGACGCCTTCCAC  
CCCAGGCCCTTCTGCATGCGCCGCGTCAAGGAGATGGACGCCTATGGCATGGTCTCGCCCTTCGCCCCCG  
CCCCAGCGTCAACAGTGACCTCAAGTACATCAAGGCCAAGGTCTTTCGGGAAGGCCAGGCCCGTGAGAGGG  
ACAAGTGCACCATCCAGTGA GCGAGGGATGCTGGGGCGGGGCTTGGCCAGTGCCTTCAGGGAGGTGGCCCC  
AGATGCCCCTGTGCGCATCTCCCCACCGAGGCCCGGCAGCAGTCTTGTTACAGACCTTAGGCACCAGA  
CTGGAGGCCCGGGCGCTGGCCTCCGCACATTCGTCTGCCTTCTCACAGCTTTCCTGAGTCCGCTTGTCC  
ACAGCTCCTTGGTGGTTTCATCTCCTCTGTGGGAGGACACATCTCTGCAGCCTCAAGAGTTAGGCAGAGAC  
TCAAGTTACACCTTCTCTCCTGGGGTTGGAAGAAATGTTGATGCCAGAGGGGTGAGGATTGCTGCGTCAT  
ATGGAGCCTCCTGGGACAAGCCTCAGGATGAAAAGGACACAGAAGGCCAGATGAGAAAAGGTCTCCTCTCTC  
CTGGCATAAACACCCAGCTTGGTTTGGGTGGCAGCTGGGAGAACTTCTCTCCAGCCCTGCAACTCTTACGC  
TCTGGTTACAGTGCCTCTGCACCCCTCCACCCCTCCACCCACACACACAAGTTGGCCCCCAGCTGCGCCTGA  
CATTGAGCCAGTGGACTCTGTGTCTGAAGGGGGCGTGGCCACACCTCCTAGACCACGCCACCCTTAGAC  
CACGCCACCTCCTGACCGGTTCTCAGCCTCCTCTCCTAGGTCCCTCCGCCGACAGTTGTGCTTTGTT  
GTGGTTGACAGTGTTCGTGTCTGTATAGTAGTAAATGGAATCATTGTACTGTAAAAGCCTAGTGA  
CTCCCTCCTTGGCCAGGCCCTCACCCAGTTCAGATCCACGGCCTCCACCCGGGACGCCTTCTCCTCTGCT  
CCCAAACAGGGTTTCCGTGGCCTGTTTGCAGCTAGACATTGACCTCCGCCATTGAGCTCCACGGTTTACAG  
ACAATTGCACAAGCGTGGGGTGGGCAGGCCAGGACTGCTTTTTTTAATGCTCCCATTTACAGAGGATAC  
CACCGAGACTCGGAGGGGACACGATGAGCACCAGGCCACCTTTGTCCCCTAGCAAATTCAGGGTACAGC  
TCCACCTAGAACCAGGCTGCCCTCTACTGTGCTCGTTCCTCAAGCATTTATTAAGCACCTACTGGGTGCTG  
GGTTCCTGTGCTCTAGGAAACCAAGAGGGTCCCAGTCTGCGCCTCTGCCCGCCCTGCTGCCCCACCAC  
CTTCTGCACACACAGCGGTGGGGAGGCGGGGAGGAGCAGCTGGGACCCAGAAGTGGAGCTGGGAGGGATCC  
GACAGAAAAGCTCAGGGCGGGTCTTCTCCTTGTGCCCGGGATTGGGCTATGCTGGGTACCACCATGTACTC  
AGGCATGGTGGGTTTTGAACCCATAAACCAAAGGCCCTTGTCTCAGCTCTTAACAAGTATATTTTTGTATT  
TTAATCTCTCTAAACATATTGAAGTTTTAGGGCCCTAAGGAACCTTAGTGATCTTCTATTGGGTCTTTCTG  
AGGTTTCAGAGAGGGTAAGTAACTTCCCTCAGGTACACAGCAAGTCTGTGGGTGGCAGAAGCAAGCTAGCG  
CTGGGCATTTCAGTACATAACCAGATGTGCTCCCTCTCTTGTGCTTGGCCCCCTGGGGCCTTCAGGGCTTTG  
GGACATCTTGTCTCAACCCTCTCCCTAGATCAGTCTGTGAGGGTCCCTGTAGATATTGTGTACACCATGC  
CCATGTATATAACAAGTACACACAGATGTACACACAGATGTACACATGCTCCAGCCCCAGCTCTGCATACCT  
GCACCTGCACCCAGCCTTGGCCCCCTGCCTGCGTCTGTGCTCAAAGCAGCAGCTCCAACCCTGCCTCTGTC  
CCCTTCCCCACCCACTGCCTGAGCCTTCTGAGCAGACCAGGTACCTTGGCTGCACCGGTGTGTGGCCCGCT  
CTCACCCAGGCACAGCCCCGCCACCATGGATCTCCGTGTACACTATCAATAAAAAGTGGGTTTTGTTACAAA  
AAAAAAAAAAAAAAAAAAAAAAAAAAAAAAAAAAAAAAAA

LAQQEAPGSGQGRAGGGEPEPAPCPGPAEPSEPTHGAPAPCASLPGRAQPGVPSSAGEDPRAVTRREPPQTL  
GGSAAGAAGSSPQLPALPGSSLRARGPARHSQPRAMMKTLSSGNCTLSVPAKNSYRMMVVLGASRVGKSSI  
VSRFLNRFEDQYPTIEDFHRKVYNIRGDMYQLDILDTSGNHPFPAMRRLSILTDGVFILVFLDNRESF  
DEVKRLQKQILEVKSCLKNKTKAAELPMVICGNKNDHGELCRQVPTTEAELLVSGDENCAFYEVSAKNT  
NVDEMIFYVLFMAKLPHEMSPALHRKISVQYGDFAHPRPFCMRRVKEMDAYGMVSPFARRPSVNSDLKYIK  
AKVLREGQARERDKCTIQ

AUG initiation = 30.4 kDa  
CUG initiation = 40.6 kDa

+++++

### #31

## NM\_002506

UUG/CUG initiation in mammals and most tetrapods

**NGF nerve growth factor (beta polypeptide)**

Synonyms: NGFB; HSN5; Beta-NGF; MGC161426; MGC161428; NGF

CGGACGCGTGGGGCGCTGGGAGCCGGAGGGGAGCGCAGCGAGTTTGGCCAGTGGTTCGTGCAGTCCAAGGGG  
CTGGATGGCATGCTGGACCCAAGCTCAGCTCAGCGTCCGGACCCAATAACAGTTTTACCAAGGGAGCAGCT  
TTCTATCCTGGCCACACTGAGGTGCATAGCGTAATGTCCATGTTGTTCTACACTCTGATCACAGCTTTTTCT

GATCGGCATACAGGCGGAACCACACTCAGAGAGCAATGTCCCTGCAGGACACACCATCCCCAAGTCCACT  
GGACTAAACTTCAGCATTCCCTTGACACTGCCCTTCGCAGAGCCCGCAGCGCCCCGGCAGCGGCGATAGCT  
GCACGCGTGGCGGGGAGACCCGCAACATTACTGTGGACCCAGGCTGTTTAAAAAGCGGCGACTCCGTTC  
ACCCCGTGTGCTGTTTAGCACCCAGCCTCCCCGTGAAGCTGCAGACACTCAGGATCTGGACTTCGAGGTCG  
GTGGTGTGCCCCCTTCAACAGGACTCACAGGAGCAAGCGGTTCATCATCCCATCCCATCTTCCACAGGGC  
GAATTCTCGGTGTGTGACAGTGTGAGCGTGTGGGTTGGGGATAAGACCACCGCCACAGACATCAAGGGCAA  
GGAGGTGATGGTGGTTGGGAGAAGTGAACATTAACAACAGTGTATTCAAACAGTACTTTTTTGGAGACCAAG  
TGGCGGGGACCCAAATCCCCTTGACAGCGGGTGCCTGGGGCATTGACTCAAAGCACTGGAACATCATATTGTA  
CCACGACTCACACCTTTGTCAAGGCGCTTTACCATGGGATGGCAAGCAGGGATAACCCTGGCCGGGTTATCC  
CGGATGAGATACGGGCCGGGAAAAGTGGGGCTCAACAAGGGAGGATGAAGAGAAGGAGGCTAAAGGCTGG  
CGGAAGGACATCCCCTTCCCCTGGGGCCATTCAAAAACCTTCTGCGGGGGGCCCTCCCTTAACCGGGAAC  
CTGGTAAAATGGATTTTTTAAGGGTGGTAA

LASGRAVQAGWHAGPKLSSASGPNNSFTKGAIFYPGHTEVHSVMSMLFYTLITAFLLIGIQAEPHSESNP  
AGHTIPQVHWTKLQHSLDTALRRARSAPAAAIAARVAGQTRNITVDPRLFKKRRLRSRVLVSTQPPREAA  
DTQDLDFEVGGAAPFNRTHRSKRSSSHPIFHRGEFSVCDSSVSVWVGDKTTATDIKKEVMVVGRSEH

AUG initiation = 18.3 kDa  
UUG initiation = 22.7 kDa

+++++

### #32

## NM\_152283

GUG (or ACG) initiated extension conserved in mammals – AUG in several species;  
GUG->AUG *Bos taurus*, *Sus scrofa*, *Mus musculus* (two transcriptional isoforms in mice  
one with AUG and one with GUG)

In human two 5' variants – one adding in-frame AUG just in front of the GUG

### ZFP62 zinc finger protein 62 homolog

Synonyms: ZET; ZNF755; FLJ11344; FLJ34057; FLJ34231; FLJ58781; FLJ59694;  
MGC176438; DKFZp667F2013; ZFP62

GTGAGTGATGATGATAAGCTCCCCTGCAGGTGTGAATAGAGACCCCGGAGGCGCGTCTAGCCCTCATCT  
GGGGAAGCGCACCTGCATACAGACGGGTGCACCGGGGAGGAGGCGATCTGCCGCGTGTTCCTGCAAGCAGA  
AAAGGAGTAACTAAGTGTACATTTGAAGACGAGCACTGAGGATGAGGAACCAACTGAAGAATATGAAAAT  
GTTGAAATGCAGCATCTAAGTGGCCAAAAGTGGAGGATCCATCCCTGAATCTAAGGTTGGTGACACATG  
TGTTTGGGATAGCAAGGTAGAGAATCAACAGAAAAGCCTGTGGAAAACAGGATGAAGGAGGACAAAAGCA  
GCATCAGGGAAGCAATCAGCAAAGCCAAAGAGTACAGCAAATATAAAGACAGAACAGGAAGGTGAGGCATCT  
GAGAAGAGCTTGCATCTGAGCCCACAGCATATCACACACCAGACTATGCCTATAGGACAGAGAGGCGATGA  
GCAAGGCAAACGTGTGGAGAACATTAATGGAACCTCCTACCCTAGTCTACAGCAGAAAACCAATGCTGTTA  
AGAAATTACATAAATGTGATGAATGTGGGAAATCCTTCAAATATAAATCCCCTTGTTC AACATAAAATT  
ATGCACACTGGGAAAAGCGCTATGAATGTGATGACTGTGGAGGGACTTTCGGAGCAGCTCGAGCCTTCG  
GGTCCACAAAACGGATCCACACTGGGGAGAAGCCGTACAAGTGTGAGGAATGTGGGAAAGCCTACATGTCT  
ACTCCAGCCTTATAAACCACAAAAGCACCCATTCTGGGGAGAAGAACTGTAAATGTGATGAATGTGGAAA  
TCCTTCAATTATAGCTCTGTTCTGGACCAGCATAAAAGGATCCACACTGGGGAGAAGCCCTATGAATGTGG  
TGAGTGTGGGAAGGCCTTCAGGAACAGCTCTGGGCTCAGAGTCCACAAAAGGATCCACACGGGGGAGAAGC  
CCTATGAATGCGACATCTGTGGGAAAACCTTCAGTAACAGCTCTGGCCTTAGGGTCCATAAAAGGATCCAC  
ACAGGTGAGAAACCTTACGAATGTGATGAGTGTGGGAAGGCCTTCATTACTTGTAGAACACTTCTCAACCA  
TAAAAGCATCCACTTTGGAGATAAACCTATAAATGTGATGAGTGTGAGAAATCTTTAATTATAGCTCTC  
TTCTCATTACAGCATAAAGTCATCCACACTGGAGAGAAACCTTATGAATGTGATGAATGTGGGAAGGCTTTC  
AGGAACAGCTCAGGCCTCATAGTGCATAAAAGGATCCACACAGGAGAGAAACCTTACAAGTGTGATGTCTG  
TGGCAAAGCATTACAGCTATAGCTCAGGCCTCGCAGTCCATAAAAGCATTACCCTGGGAAGAAAAGCCCATG  
AATGTAAGGAGTGTGGGAAATCCTTTAGTTATAACTCACTACTTCTTCAAACACAGAACTATTACATACCGGA  
GAGAGACCTTATGTATGTGATGTGTGTGGGAAAACGTTTCAAGAAACAAATGCAGGCCTCAAAGTCCACAGGAG

GCTCCATACTGGGGAAAAACCATATAAGTGTGATGTGTGTGGGAAAGCCTATATCTCACGCTCTAGCCTTA  
AAAATCACAAAGGAATCCACCTTGGGGAGAAGCCCTATAAATGTAGCTATTGTGAGAAATCCTTCAACTAC  
AGCTCTGCCCTTGAACAGCATAAAAGGATTACATACCAGGGAAAAACCCCTTTGGGTGTGATGAGTGTGGTAA  
AGCTTTCAGAAATAATTCTGGCCTTAAAGTACATAAACGAATCCACACTGGGGAACGACCTTACAAATGTG  
AAGAATGTGGGAAAGCATAACATCTCTCTCGAGCCTTATAAATCATAAAAGTGTACACCCTGGGGAGAAG  
CCCTTTAAGTGTGACGAGTGTGAGAAGGCCTTCATCACATACCGAACCCCTTACAAACCACAAAAAAGTTCA  
TCTTGGGGAGAAGCCCTACAAATGTGATGTGTGTGAGAAATCTTTTAAATTACACATCGCTCCTTTCTCAGC  
ACAGAAGGTCCACACTAGAGAGAAAACCCCTATGAATGTGACAGGTGTGAGAAGGTCTTCAGAAACAACCTCA  
AGCCTTAAAGTTCATAAAAGAATCCATACTGGGGAGAGGCCCTATGAATGTGATGTGTGTGGAAAAGCCTA  
CATCTCACACTCAAGCCTTATTAACCATAAGAGTACCCACCCTGGCAAGACACCCCATACATGTGATGAAT  
GTGGAAAAGCTTTTTCTCAAGCAGAATCTTATAAGCCATAAAAGAGTCCATCTTGGGGAGAAAACCCCTTC  
AAGTGTGTTGAGTGTGGGAAATCTTTCAGTTACAGCTCTCTCCTTTCTCAGCACAAGAGGATCCACACAGG  
GGAGAAAACCCCTATGTGTGTGATAGGTGTGGGAAGGCCTTCAGGAACAGCTCAGGCCTCACAGTGCATAAAA  
GGATCCACACAGGTGAGAAAACCCCTATGAATGTGATGAGTGTGGGAAGGCATACATCTCACACTCAAGTCTT  
ATCAATCATAAAAGTGTCCACCAGGGGAAGCAGCCCTATAAATTGTGAGTGTGGGAAATCCTTCAATTATAG  
ATCAGTCCTTGACCAGCACAAAAGGATCCACACTGGAAAAGGCCATACCGATGTAATGAGTGTGGTAAGG  
CTTTTAAATATCAGATCAAATCTCACCAAGCATAAAAAGAACCCTACTGGAGAGGAATCTTTAAATGTGATA  
TATGTGGGAAGTTATAGTGGCACATCCAGAAAGAGAACCCTATGAGGGAGGGAATGCCCTGGATGGGGGCAG  
GATGAGGATGCCTCTGTAGCAGGCAGAGCTTACCAAGTCTCTCCGAACCTCAAATGGAAGAAATACCTTATG  
AATGTAAGAATGTAGGGGGTTCATGGCTTGTAAATTTACACAGTGTAAATGAAACCATCCTAGAGGATTATGA  
GGAATCCTTTCTATGTGATTTTCAATCATAGCAAGCAAGAAAGGCTCCAGTGTCAAGGTAGTTTACAGCTCTT  
ACAGGATATAAAACAGTCCATACTTGGAGAGAAAACCTTAGATCTGAGTGTGGAATGTGAAGCAAATCTTC  
AAAATCAGTAGACATTTCTGGACATAAAACACAGATGAGGAAAGGGCTTCAATTAGAAGTTACGTAATCAC  
CATCAGAAAGTTCATGTTTGGTAAATTTCTGTTACTAGAAATGTAGGAAATTCAGGTATAGCTTTGAATCCC  
AATTACACATTTGGTCAAGTGGGAAAACCTAAGGGCCTCCAACAGGCAAATTCAGGGAGGATAGGTTTCAGGGA  
ATATAAATTTATTTAATATTAGTGGTCTTTAAGTATAAACTTGATGTAATTTGGTTTGGGAGGGGGCAGTGA  
TGATGACTTCTGAAACAAAATTTGGATTTCTTTTAGGAAAAGTAGAAAGCATAGACTTACAAGTCTAACA  
GGAGATAGGAGAGAGTCACTCATAAAAAATGCAAATGATGAACGTACTATTGTGATACATTAGTTGAATG  
GATGAAACTTTTTTAAAGTTTTCAGATGAATCCCATAATGAATGATGAATTTGTGATGAGGATAAATGG  
AAGTGGTATTTCACACATTATGCTACAATAAAAGGTTTACCCTGGAGAGGATTTTGCACATTAGTAAGT  
AATGGAACACACCGTCAACATGAATTCGCACCTTACATGACAGAAGTGATTGAGGGATTCTATGAATAGA  
AATGCTGAGAAGGAACGCATTTTTATTGCAGAAGCTAAAAAGCTAAAGTACCAGTCATCTAGAGAGAAGGAA  
ATTAATGTTTCTTAATAATCCTGTTAAATGTTTGTATTGTTTTTGAATGTGTTATTGTAAGATGTCATGC  
AGGACATGTATATGTTGTCTGTTGTAATAATGTTAACGAATACTTTGTTTCAAGGGCTCACTCTCTTTTGTCA  
TGAAAGCCAGCTCCTTGTGGCGAGGTAAAGTGAATTCCAATAAAGAAATTCCTTAAATCAAAA

VSHLKTSTEEDEEPTEEYENVGNAASKWPKVEDPIPIESKVGDTCVWDSKVENQKKPVENRMKEDKSSIREA  
ISKAKSTANIKTEQEGEASEKSLHLSPQHITHQTMPIGQRGSEQGKRVENINGTSYPSLQKKTNAVKKLHK  
CDECGKSFKYNSRLVQHKIMHTGEKRYECDDCGGTFRSSSSLRVHKRIHTGEKPYKCEECGKAYMSYSSLI  
NHKSTHSGEKNCKCDECGKSFNYSSVLDQHKRIHTGEKPYECGECGKAFRNSSGLRVHKRIHTGEKPYECD  
ICGKTFSNSSLRVHKRIHTGEKPYECDCEGKAFITCRTLLNHKSIHFGDKPYKCECEKSFNYSSLLIQH  
KVIHTGEKPYECDCEGKAFRNSSGLIVHKRIHTGEKPYKCDVCGKAFSYSSGLAVHKS IHGPKKAHECKEC  
GKSFSYNSLLQLHRTIHTGERPYVCDVCGKTFRNNAGLKVHRRLLHTGEKPYKCDVCGKAYISRSSLNKHG  
IHLGEKPYKCSYCEKSFNYSSALEQHKRIHTREKPFGCDECGKAFRNNSGLKVHKRIHTGERPYKCEECGK  
AYISLSSLINHKSVHPGEKPFKCECEKAFITYRTLINHKVHLGEKPYKCDVCEKSFNYTSLLSQHRRVH  
TREKPYECDRCEKVFRRNSSLKVHKRIHTGERPYECDVCGKAYISHSSLINHKSTHPGKTPHTCDECGKAF  
FSSRTLISHKRVLGEKPFKCEGKSFYSYSSLLSQHKRIHTGEKPYVCDRCGKAFRNSSGLTVHKRIHTG  
EKPYECDCEGKAYISHSSLINHKSVHQGKQPNCECGKSFNYRSVLDQHKRIHTGKKPYRCNECGKAFNIR  
SNLTKHKRTHTEEESLNVIVGYSYSGTSQKRTYEGGNALDGGRRMPL

AUG initiation = 95.6 kDa  
GUG initiation = 102.4 kDa

+++++

#33

## NM\_001102654

UUG/CUG initiated extension conserved in mammals and likely most vertebrates

### NTF3 neurotrophin 3

Synonyms: NT3; HDNF; NGF2; NGF-2; MGC129711; NTF3

AGTTGAAGCTCCTCTCCCTTCCGAACAGCTCCGCGCACCGCCCCGCGACGCAGCCCCGGCGCAACTACTTTTC  
 TTCTCTCTCCTTTCTTTCTTCTCTCCTTTTTTCCCCTGCTGGGTAGTGGCTGCGGCGGGGTGGGGGAGACT  
 TTGAATGACCGAGCTCGCGTCCACCTTTCTCTTCATGTCGACGTCCCTGGAAACGGCCACACGGATGCCAT  
 GGTACTTTTTGCCACGATCTTACAGGTGAACAAGGTGATGTCCATCTTGTTTTATGTGATATTTCTCGCTT  
 ATCTCCGTGGCATCCAAGGTAACAACATGGATCAAAGGAGTTTGCCAGAAGACTCGCTCAATTCCTCATT  
 ATTAAGCTGATCCAGGCAGATATTTGAAAAACAAGCTCTCCAAGCAGATGGTGGACGTTAAGGAAAATTA  
 CCAGAGCACCCCTGCCCAAAGCTGAGGCTCCCCGAGAGCCGGAGCGGGGAGGGCCCCGCAAGTCAGCATTCC  
 AGCCGGTGATTGCAATGGACACCGAACTGCTGCGACAACAGAGACGCTACAACCTACCCGCGGGTCTGCTG  
 AGCGACAGACCTCCCTTGGAGCCCCCGCCCTTGTATCTCATGGAGGATTACGTGGGCAGCCCCGTGGTGCC  
 GAACAGAACATCACGGCGGAAACGGTACGCGGAGCATAAGAGTCAACGAGGGGAGTACTCGGTATGTGACA  
 GTGAGAGTCTGTGGGTGACCGACAAGTCATCGGCCATCGACATTGCGGGACACCAGGTACCGGTGCTGGGG  
 GAGATCAAAACGGGCAACTCTCCCGTCAAACAATATTTTTATGAAACGCGATGTAAGGAAGCCAGGCCGGT  
 CAAAAACGGTTGCAGGGGTATTGATGATAAACACTGGAACCTCTCAGTGCAAAACATCCCAAACCTACGTCC  
 GAGCACTGACTTCAGAGAACAATAAACTCGTGGGCTGGCGGTGGATACGGATAGACACGTCCTGTGTGTGT  
 GCCTTGTGAGAAAAATCGGAAGAACA TGAATTGGCATCTCTCCCCATATATAAAATTATTACTTTAAATTA  
 TATGATATGCATGTAGCATATAAAATGTTTATATTGTTTTTATATATTATAAGTTGACCTTTATTTATTTAAA  
 CTTTCAGCAACCCTACAGTATATAAGCTTTTTTCTCAATAAAATCAGTGTGCTTGCCTTCCCTCAGGCCTCT  
 CCCATCTGTTAAAACCTTGTGTTTGTGATCCGGCTCTCAGGAGTCACTCTGTAAAATCTGTGTACACCAGTAT  
 TTTGCATTCAAGTATTGTCAAGGCCATGACTGTTGTTTTAGTAAACTTGTAAAATCAAAAAAAAAAAAAA  
 LNDRARVHLSLHVDVPGNGHTDAMVTFATILQVNKVMSSILFYVIFLAYLRGIQGNMMDQRSLEPDSLNSLI  
 IKLIQADILKNKLSKQMVVDVKENYQSTLPKAEAPREPERGGPAKSAFQPVIAMDTELLRQRRYNSPRVLL  
 SDSTPLEPPPLYLMEDYVGGSPVAVNRTSRRKRYAEHKSHRGEYSVCDSESLWVTDKSSAIDIRGHQVTVLG  
 EIKTGNPQVYFYETRCKEARPVKNGCRGIDDKHWSQCKTSQTYVRALTSENNKLVGWRWIRIDTSCVC  
 ALSRKIGRT

AUG initiation = 30.8 kDa

UUG initiation = 33.3 kDa

+++++

#34

## NM\_003252

Possible GUG initiation. Strong conservation (in mammals) at least at nucleotide level.

### TIAL1 TIA1 cytotoxic granule-associated RNA binding protein-like 1

Synonyms: TCBP; TIAR; MGC33401; TIAL1

TCTTCACGTCCCAGCGCGGGTGGGCGCCGGCGGCTCCTCTTAACCACAGGTTCCAGAAGTCTCTGCAGAA  
 GTGCTTCCCTCTCTCATTTCCAGGACCACAATTCAGAGACTTCCGGCTTACGACGTTTCTCTTTTTGCC  
 CGATCTCTCCCGAGCTGGCTGGGCTTCCGGCCGGCCAGAGGCCACAGCGACGACGTGATCCGTGCTGAGC  
 GGGTCCCAGGGTTTCTCGGCGGCCCTTTTTTCTCTCCCTCGGTCGTCCTCCCTTGCAGGCTGTGCGGGCT  
 GGCTTGAGCGGTGACCTGGCGGGTGCAGCCTGCGCTCTGCCCTGTTTCTGCTGGCTGGTGGCGGGGCC  
 ATTTTGTTCATCTCCTCCTCCTCCTGCTCCTCCTGGTTGGAGCGCAGTGTCCGGAGCGGGCTGGGGGGAG  
 AGAGCCCAGAGCAGGGTTCGGTGCCTTTTCTCTGTCCCAGCCGGTGCAGAGCCCCCTCCCCTTCC  
 TCCCCACCCCTCCCCTCCCCAACCCCTGCCCTCCCCCTTGTCCCGGATCGCTCCGTGCGACCCACCATGA  
 TGGAAGACGACGGGACGCCCGGACTCTATACGTAGGTAACCTTCCAGAGATGTGACAGAAGTCCTTATA  
 CTTTCAGTTGTTTCAGTCAAGTGGACCCTGTAAAAGCTGTAAAATGATAACAGAGCATAACAAGCAATGACCC  
 ATATTGCTTTGTGGAATTTTATGAACACAGAGATGCAGCTGCTGCATTAGCTGCTATGAATGGGAGAAAAA  
 TTTTGGGAAAGGAGGTCAAAGTAAACTGGGCAACCACCAAGTAGCCAGAAAAAGATACTTCCAATCAC

TTCCATGTGTTTGTGGGGATTTGAGTCCAGAAATTACAACAGAAGATATCAAATCAGCATTGCCCCCTT  
TGGTAAAATATCGGATGCCCCGGGTAGTTAAAGACATGGCAACTGGAAAATCCAAAGGCTATGGTTTTGTAT  
CTTTTTATAACAACTGGATGCAGAAAATGCGATTGTGCATATGGGCGGTGAGTGGTTGGGTGGTTCGTC  
ATCCGAACCAATTGGGCCACTCGTAAACCACCTGCACCTAAAAGTACACAAGAAAAACAACACTAAGCAGTT  
GAGATTTGAAGATGTAGTAAACCAGTCAAGTCCAAAAAATTGTACTGTGTACTGTGGAGGAATTGCGTCTG  
GGTTAACAGATCAGCTTATGAGACAGACATTCTCACCATTTGGACAAATTATGGAAATAAGAGTTTTCCCA  
GAAAAGGGCTATTCAATTTGTGAGATTTTCAACCCATGAAAAGTGCAGCCCATGCCATTGTTTCGGTGAACGG  
TACTACGATTGAAGGACATGTGGTTAAATGCTATTGGGGTAAAGAATCTCCTGATATGACTAAAACTTCC  
AACAGGTTGACTATAGTCAATGGGGCCAATGGAGCCAAGTGTATGGAAACCCACAACAGTATGGACAGTAT  
ATGGCAAATGGGTGGCAAGTACCGCCTTATGGAGTATACGGGCAACCATGGAATCAACAAGGATTTGGAGT  
AGATCAATCACTTCTGCTGCTTGGATGGGTGGATTTGGTGTCTCAGCCTCCCCAAGGACAAGCTCTCCCC  
CTGTAATACCTCTCTTAACCAAGCCGGATATGGTATGGCAAGTTACCAAAACACAGTGAACCGGGACTCTA  
AAAAAAATTTGTAATTCATGATAGGCTTCGATTTTCTGTGACACTCTGAAGACATGAAAAGTAGACATCGGA  
AAATGAAAATATTTATTTTAAAAATTTGAAATGTTTGGAACTTTAGCACAGATTTGCTTTGGTGAAGGACA  
CGTGTCTTCTAGTTCTGCCTTTTTAAGTTTTTGTTCATGATGGATATGAACATGATTTTTCTTTATGTACA  
AAAATAAAATAAAGTCAATAAAGACAATTCTGACTACAAATTTTGATATAATAGGAAAAATGGCTAATAC  
ATTTTGATTCTTAGATACTATTCCATTTTTATCTTGCTGTTGAGTATTTAACTCACTGTGTTTTTAAAG  
AGCAAAAAAGGGAGGATCGTGA AACCTGGGAATCACATATAAGTTCATCCTGAATCCTGATACTCCCCTC  
CCCTTCCCTGAGGTGGACCACATTTGAAGTGCAGCAGAGAAAAAGTGTGATATTGAGAAGAAATGCGTGATT  
TTGGAGTCGCTTTGGAGGAAATATTTTCTTCTATGCCTAAAGAACTGAAGCCAGACTGAAGTTTTGC  
ACCCTAAAAAGGAACAGCATTGTTTGGAGTACTTGGACAAATGTTGGTGGTCCACGTTAAGACATATTTT  
TAAAATTTCCAAAAGTGTGATTATTAATTTGATGATTTTACATTTTCAATTTGGGGGGAAATCCAAGTA  
TGGTGTGTTGATTGAAGTGCAGACAGTCATACTTGTGCTTTTACATGAAGTTTAAATGATACATATTGAAA  
TATTCAATAACTACAGTGTAAAAAGCATGCTTCAACATAGAAGTAGCAGCAATGTAATTTTGAAGTA  
ACACTTAACACACTCCGCTGCATTGAATGCAGTGGATTGATCAGAATGTTAAGACTGACATTTCCAAGGTT  
GGCTACTATGTA AAAATTA AAAATTAACAAAATTTGTGCAGAAAAAGCCTTAATTTTAAATTTTATACAATCTTT  
GATGCATTAGTATGTTCTAAAATGTCATTGGGAATTAGTTTTTTGTTTTTGTTTTTTTTTTTTTTTTTTTT  
TGCTTTACATACTTGGTATGTAATACTTTGATTTAAACCTTGTAAACCAATTTCAAGGTTACTATAAGT  
TGTATAGTACAAGTGTTTTTTAAAAATCTTGGGGTGTTTTTTAAAAATTAAGATATATTTTGGCCAAGAATT  
TTTTTAAACAAGATTGCTAAAAACATCTTATTTAGACACTTCAATGTACCAATTTATAATTTGGATTCAGT  
TTAAATAGTACACAGAGTTGTGGCTTTTTATTTTCAATTAATTTTTTTTCTTGTGGGCAGTGTGCATGGTAT  
AATAAGCCTGAGCAGAGGCTTAAAGTTGATGTGTGCAGAGTTTGTAAAGGAATCAATTGGAAGATGCAGAA  
GACCGAGTTTTGCTTTCAAGGTATTTTTTCAAGGCTGTGTGGGTAAAATTTGCCTCAAATTTCTATCAAACAG  
GAATGTA AAAATAGATAAAAATCCTATGATTTGAATTGTGCAGAGCTAGGGAGTGCAAATGTTTTGGCAATGT  
ATTCAAAATGCTGGCCTGGGCACCAAAGAGAAAATAGCCTTTTACAGTTACATAGTAAGATGCGATTAGTA  
CCCACAAATTAAGTTTTCTAAACATTTGAAGTTTTACGATTAGCTTTAAAATAATGATTTTATAAATTGG  
TGGTCACAATAATTTGGTATTACTTTCTCCTTTTCCCCTTAGCAATATAGCCAAATGTATTCAACATA  
AAAATTCATAGGCTGTGAAATTCATAGCTGGGCCAAATTTTTTATGGCACCTTAGTTTTTACCATAATGGTC  
ATCTATTACACTCTTCTGTTATAAAAATATACCCTTATTTCTTTTGTATAGTATCTTTGAGGAATGTTTT  
TGGAAAAGTTAATTTATATTTTATAGGGAGAACACTCAATAAATTATGTTAACTGTGCCCCCGAGTTAAAA  
ATTTTATGAGTATATGTGAACTTGAACAACCTGAAGACTTTTTTTAATTGATAAAAATGCTTAGTATGCCT  
GTTTTGGTCTGCCAGTAAATTAAGTAGCTTATTGAGATAACTAACAGCTAAATATAGCTGTAGTGTTCCT  
GACTGTATATTCTATGATTTAATAAAAATTAATCCAGACTAGTTATATTGCCACAGTAAAAA

VTWRVAPALCPVSLAGGGGHFVHPPPPAPPGWSAVSAGWGERAREQGSVPFPLSPAGAQSPPPLPPHP  
LPSPTLPSPLSRDRSVAPTMEDDGGQPRTLVYVGNLSRDVTEVLILQLFSQIGPCKSCKMITEHTSNDPYCF  
VEFYEHRDAAAALAAMNGRKILGKEVKVNWATTPSSQKKTDSNHFHVFGDLSPFITTEDIKSAFAPFGKI  
SDARVVKDMATGKSKGYGFVSFYNKLEAENAIVHMGQWLGGRRQIRTNWATRKPAPKSTQENNTKQLRFE  
DVVNQSSPKNCTVYCGGIASGLTDQLMRQTFSPFGQIMEIRVFPEKGYSFVRFSTHESAHAIVSVNGTTI  
EGHVVKCYWGKESPDMTKNFQQVDYSQWGWQSQVYGNPQQYQYQYMANGWQVPPYGVYQVWPNQQQFGVDQS  
PSAAWMGGFQAQPPQQAAPPVIPPVPPNQAQYGMASYQTQ

AUG initiation = 41.6 KDA  
CUG initiation = 50.6 KDA

+++++

#35

**NM\_024794**

ACG initiation conserved in mammals

**EPHX3 epoxide hydrolase 3**

Synonyms: ABHD9; FLJ22408; MGC131519; EPHX3

CCATTTATTTCCCCCTTTCCAACCTCTTCTCCCCAGCCTCCGCACCCTACCCTTGTTTCCTGTCCCTGT  
CGCGCCCAGGTGTTTACCTGGCACTCAGGTGAGTGGTGCGCTCTGGCTGTTTTCTGTGCGAGCCGCCCGCC  
TCTTCCTTCAGCGCGTCCCACAAATCCCGACGGC**ACGGAGGGGGCCCCAGGCCAAGGGCGATGGGCCCTGA**  
**GCCCTGACACCGCTTCGCCGCTGCTGCAGGTGCCCTGGCCGGCAGCGCCGCCGTGGTCCCGGAGCGCGGC**  
**GACATGCCGGAGCTGGTGGTGACCGCGCTGCTGGCGCCGTGCGGCCTGTGCTGAAGCTGCTGCGCGCCTT**  
CATGTGGAGCCTGGTGTTCCTGGTGGCGCTGGTGGCCGCGGGCGGTCTACGGCTGCATAGCGCTCACGCACG  
TGCTGTGCCGGCCCCGGCGCGGCTGCTGCGGGCGCCGTGCGGAGCGCGTCCCCCGCCTGCCTGAGCGACCCC  
TCGCTGGGTGAGCACGGTTTCTGAACCTCAAGAGCTCGGGCCTGCGTCTGCACTATGTCTCGGCTGGACG  
AGGTAACGGACCCCTCATGCTGTTTCTGCACGGCTTCCCTGAGAACTGGTTCTCCTGGCGTTACCAGCTCC  
GGGAGTTCAGAGCCGCTTCCATGTTGTGGCTGTGGACTTGCAGAGGCTATGGCCCCCTCGGATGCACCTCGG  
GATGTGGACTGCTACACAATCGACCTGCTGCTGGTGGACATCAAAGATGTCATCCTAGGCCTGGGTTACTC  
GAAGTGCATCCTTGTGGCCATGACTGGGGTGCCTCCTTGCCTGGCATTCTCCATCTACTACCCATCCC  
TGGTCGAGCGGATGGTTGTGGTCACTGGTGGCCCCCATGTGCGGTGTACCAAGACTATCCCTGCACCACATC  
AGCCAGTTCTTCCGTTCCCACTACATGTTCTGTTCCAGCTGCCCTGGCTGCCCGAGAAGCTGCTGTCTAT  
GTCTGACTTTCAGATTCTGAAGACCACCCTCACCCACCGCAAGACAGGCATCCCATGCTTGACCCCCAGCG  
AGCTCGAGGCCTTCTTTATAACTTCTCACAGCCTGGTGGCCTCACTGGGCCCCCTCAACTACTACCGAAAC  
CTCTTCAGGAACTTCCCCCTGGAACCCAGGAGCTGACCACACCCACATTGCTGCTGTGGGGGGAGAAGGA  
CACTTACTTGGAGCTGGGGCTGGTGGAAAGCCATCGGCAGCCGCTTTGTGCCGGGCCGCTTGGAGGCCACA  
TCCTGCCAGGCATAGGGCATTGGATCCACAGAGCAACCCCCAGGAGATGCACCAGTACATGTGGGCCTTC  
**TTGCAAGACCTGCTGGACTAG**TGGTCTTGTGCTGGCCTGCCAGGAGGCATGGATACTCAGGAAGGAACACA  
CACCCATTATCTGTGTGTGCCTGGGAGTCCATAAATGTCCATACATGGGTGAACCTTGAATCGCTCATA  
GGCATGGGACTCCTGGATCCACACAAGCGCACCTATGGGTGCCTCGGGACACACCAACCCCTATACTCAC  
ACACAGGCATGGATGCATGTGTGTGTAACAAACACTTTGACCCTGGGAAGTGGGTATACCTCTCTTCCAGT  
GGAGCCAGATGCCGAGACCGAGTGTCCACCTCCTCCCTTCCCTGGGGCCTCACTCTGCGCTTTGCCAAAGT  
CGCTTCTCTGCCATAGCTGCACAGACCTTAAACCCTGACCTTCCCTGTCCCTGCCTTCGACCTCCTGCCTGG  
GTCTTCAGCTCAGTGCTACTCTGAATACAATACTGCTGACCACATTTGGCTACTTCAGCTTAAATGTATGT  
TAATTGAAATGAAATACAATGAAAATGCAGTGCTCAGTCCCA

**TEGPQAKGDGPLSPDTASPLLQVPLAGSAAVVPERGDMPELVVTTALLAPSRLSLKLLRAFMWLSLVFSVALV**  
**AAAVYGCIALTHVLCRPRRGCCGRRRSASPACLSDPSSLGEHGFLNLKSSGLRLHYVSAGRNGPLMLFLHG**  
**FPENWFSWRYQLREFQSRFHVAVDLRGYGPSDAPRDVDCYTIDLILLVDIKDVILGLGYSKILVAHDWGA**  
**LLAWHFSIYYPSLVERMVVSGAPMSVYQDYSLHHISQFFRSHYMFLFQLPWLPEKLLSMSDFQILKTTLT**  
**HRKTGIPCLTPSELEAFLYNFSQPGGLTGPLNYRNLFRNFPLEPQELTTPTTTTLLWGEKDTYLELGLVEAI**  
**GSRFVPGRLEAHILPGIGHWIPQSNPQEMHQYMWAFLQDLLD**

AUG initiation = 40.9 kDa  
ACG initiation = 44.5 kDa

+++++

#36

**NM\_018646**

ACG initiated extension conserved in mammals. Extension initiated by AUG in bats:  
*Myotis lucifugus* and *Pteropus vampyrus*.

Synonyms: **TRPV6 transient receptor potential cation channel, subfamily V, member 6**

CAT1; CATL; ZFAB; ECAC2; ABP/ZF; LP6728; HSA277909; TRPV6

AGAGTCCTGGCTGGCTCTGCCAAGTGTAAACAACTCACAGCCCTCTCCAAACTGGCTGGGGCTGCTGGGGAG  
ACTCCAAGGAACCTCGTCAGGAAGGCAGGAGACAGGAGACGGGACCTCTACAGGGAGACGGTGGGCGGGCC  
CTTGGGGGGCTGATGTGGCCCCAAGGCTGAGTCCCGTCAGGGTCTGGCCTCGGCCTCAGGCCCCCAAGGA  
GCCGGCCCTACACCCCATGGGTTTGTCACTGCCAAGGAGAAAGGGCTAATTCTCTGCCTATGGAGCAAGT  
TCTGCAGATGGTTCCAGAGACGGGAGTCTGGGGCCAGAGCCGAGATGAGCAGAACCTGCTGCAGCAGAAG  
AGGATCTGGGAGTCTCCTCTCCTTCTAGCTGCCAAAGATAATGATGTCCAGGCCCTGAACAAGTTGCTCAA  
GTATGAGGATTGCAAGGTGCACCAGAGAGGAGCCATGGGGGAAACAGCGCTACACATAGCAGCCCTCTATG  
ACAACCTGGAGGCCGCCATGGTGTCTGATGGAGGCTGCCCGGAGCTGGTCTTTGAGCCCATGACATCTGAG  
CTCTATGAGGGTCACTGCACATCGCTGTTGTGAACCAGAACATGAACCTGGTGCAGGCCCTGCT  
TGCCCGCAGGGCCAGTGTCTCTGCCAGAGCCACAGGCACTGCCTTCCGCCGTAGTCCCTGCAACCTCATCT  
ACTTTGGGGAGCACCTTTGTCTTTGCTGCCTGTGTGAACAGTGAGGAGATCGTGCGGCTGCTCATTGAG  
CATGGAGCTGACATCCGGGCCAGGACTCCCTGGGAAACACAGTGTTACACATCCTCATCTCCAGCCCAA  
CAAAACCTTTGCCTGCCAGATGTACAACCTGTTGCTGTCTACGACAGACATGGGGACCACCTGCAGCCCC  
TGGACCTCGTGCCCAATCACCAGGGTCTCACCCCTTTCAAGCTGGCTGGAGTGGAGGGTAACACTGTGATG  
TTTCAGCACCTGATGCAGAAGCGGAAGCACACCCAGTGGACGTATGGACCACTGACCTCGACTCTCTATGA  
CCTCACAGAGATCGACTCCTCAGGGGATGAGCAGTCCCTGCTGGAACCTTATCATCACCACCAAGAAGCGGG  
AGGCTCGCCAGATCCTGGACCAGACGCCGGTGAAGGAGCTGGTGGACCTCAAGTGGAAAGCGGTACGGGCGG  
CCGTACTTCTGCATGCTGGGTGCCATATATCTGCTGTACATCATCTGCTTACCATGTGCTGCATCTACCG  
CCCCCTCAAGCCCAGGACCAATAACCGCACGAGCCCCGGGACAACACCTCTTACAGCAGAAGCTACTTCC  
AGGAAGCTACATGACCCCTAAGGACGATATCCGGCTGGTGGGGAGCTGGTACTGTCTATTGGGGCTATC  
ATCATCCTGCTGGTAGAGGTTCCAGACATCTTCAAGTGGGGGTCACTCGCTTCTTTGGACAGACCATCCT  
TGGGGGCCCATTCATGTCTCATCATCACCTATGCCTTTCATGGTGTGGTACCATGGTATGCGGCTCA  
TCAGTGCCAGCGGGGAGGTGGTACCCATGTCTTTGCACTCGTGTGGGCTGGTGGCAACGTATGTACTTTC  
GCCCGAGGATTCCAGATGCTAGGCCCTTACCATCATGATTGAGAAGATGATTTTTGGCGACCTGATGCG  
ATTCTGCTGGCTGATGGCTGTGGTTCATCCTGGGCTTTGCTTTCAGCCTTCTATATCATCTTCCAGACAGAGG  
ACCCCGAGGAGCTAGGCCACTTCTACGACTACCCCATGGCCCTGTTTCAGCACCTTCGAGCTGTTTCTTACC  
ATCATCGATGGCCAGCCAACTACAACGTGGACCTGCCCTTTCATGTACAGCATCACCTATGCTGCCTTTGC  
CATCATCGCCACACTGCTCATGCTCAACCTCCTCATTGCCATGATGGGCGACACTCACTGGCGAGTGGCCC  
ATGAGCGGGATGAGCTGTGGAGGGCCCAGATTGTGGCCACCACGGTATGCTGGAGCGGAAGCTGCCTCGC  
TGCCTGTGGCCTCGCTCCGGGATCTGCGGACGGGAGTATGGCCTGGGAGACCGCTGGTTCCTGCGGGTGA  
AGACAGGCAAGATCTCAACCGGCAGCGGATCCAACGCTACGCACAGGCCTTCCACACCCGGGGCTCTGAGG  
ATTTGGACAAAGACTCAGTGGAAAACTAGAGCTGGGCTGTCCCTTTCAGCCCCACCTGTCCCTTCTATG  
CCCTCAGTGTCTCGAAGTACCTCCCGCAGCAGTGCCAATTGGGAAAGGCTTCGGCAAGGGACCTTGAGGAG  
AGACCTGCGTGGGATAATCAACAGGGGTCTGGAGGACGGGGAGAGCTGGGAATATCAGATCTGACTGCGTG  
TTCTCACTTCGCTTCTGGAACCTTGTCTCTCATTTTCTGGGTGCATCAAAACAAAACAAAACAAAACCCC  
AGAGGTCTCATCTCCCAGGCCCCAGGGGAGAAAGAGGAGTAGCATGAACGCCAAGGAATGTACGTTGAGAA  
TCACTGTCCAGGCCTGCATTACTCCTTTCAGCTCTGGGGCAGAGGAAGCCCAGCCCAAGCACGGGGCTGGC  
AGGGCGTGAGGAACCTCCTGTGGCCTGCTCATCACCCCTTCCGACAGGAGCACTGCATGTCCAGACACTTT  
AAAAACAGCCAGCCTGCTTGGGCGCTCGGTCTCCACCCAGGGTATAAGTGGGGAGAGAGCCCTTCCCA  
GGGCACCCAGGCAGGTGCAGGGAAGTGCAGAGCTTGTGGAAAGCGTGTGAGTGAGGGAGACAGGAACGGCT  
CTGGGGGTGGGAAGTGGGGCTAGGTCTTGCCAACCTCCATCTTCAATAAAGTCGTTTTTCGGATCCCTGAAAA  
AAAAAAAAAAAAAAAAAAAAA

TGPLQDGGPALGGADVAPRLSPVRVWPRPQAPKEPALHPMGLSLPKKGLIILCLWSKFCRWFQRRESWAQ  
SRDEQNLQKRIWESPLLLAAKDNDVQALNKLKLYEDCKVHQRGAMGETALHIAALYDNLLEAMVLMEEAA  
PELVFEPMTSELYEQTALHIAVVNQNMNLVRLALLARRASVSARATGTAFRRSPCNLIYFGEHPLSFAACV  
NSEEIVRLLIEHGADIRAQDSLGNLTVLHILILQPNKTFACQMYNLLLSDYDRHGDHLQPLDLVPHQGLTPF  
KLAGVEGNTVMFQHLMQKRKHTQWTYGPLTSTLYDLTEIDSSGDEQSLELEIITTKKREARQILDQTPVKE  
LVSLKWKRYGRPYFCMLGAIYLLYIICFTMCCIYRPLKPRNTNNRTPRDNTLLQKLLQEAYMTPKDDIRL  
VGELVTVIGAIILLVEVPDIFRMGVTRFFGQITLGGPFHVLIIITYAFMVLVTMVMRLISASGEVVPMSFA  
LVLGWCNVMYFARGFQMLGPFTIMI QKMI FGDLMRFCWLMAVVILGFASAFYIIFQTEDPEELGHFYDYPM  
ALFSTFELFLTIIDGPANYVDL PFMYSITYAFAI IATLLMLNLLIAMMGDTHWRVAHERDELWRAQIVA

TTVMLEKRLPRCLWPRSGICGREYGLGDRWFLRVEDRQDLNRQRIQRYAQAFHTRGSEDLDKDSVEKLELG  
CPFSPHLSLPMPSVSRSTSRSSANWERLRQGTLLRRDLRGIINRGLLEDGESWEYQI

AUG initiation = 83.2 kDa  
ACG initiation = 87.3 kDa

+++++

### #37

## NM\_033315

non-AUG extension in mammals - multiple potential initiation start sites

Synonyms: **RASL10B RAS-like, family 10, member B**

RRP17; MGC47540; VTS58635; RASL10B

GCGCTCCGGAGGGAGAGCTGGGGCTGGAGGTTCTACCCCTCGGGCGCCCGCATCTGCCCCGCGCGCCC  
GCCC**TGA**GCCCCGCCCCGACTGGGCAGGCGGGGAGCCCTACTTCTCTCCCCCGGGCGGGGAGCCGGGG  
GGCAGCGCCGGAGCCCGGGGGAGCTCAGCCCCGCCGACCGGCCAGGGCAGGGGGCAGCTAGGACGG  
CCCCGGTCCAGGTGGAGGCCGAGAGGGCCAGGGCAAGCAGAGGCAGCAATGG**TTGGTCTGACGGTGGC**  
**TGAGCCCCAGCCCCTGGAATATGCAGCCCGGGGAGCCCCAGACAGCGGCAAGGACGAGGTGGCGGAGTG**  
**GGGCGGGAGGCATGGTCTCCACCTACCGGGTGGCCGTGCTGGGGGCGCGAGGTGTGGGCAAGAGTGCCATC**  
**GTGCGCCAGTTCTTGTACAACGAGTTCAGCGAGGTCTGCGTCCCCACCACCGCCCGCCCTTTACCTGCC**  
**TGCTGTGCTCATGAACGGCCACGTGCACGACCTCCAGATCCTCGACTTTCACCCATCAGCGCCTTCCCTG**  
**TCAATACGCTCCAGGAGTGGGCAGACACCTGCTGCAGGGGACTCCGGAGTGTCCACGCCTACATCCTGGTC**  
**TACGACATCTGCTGCTTTGACAGCTTTGAGTACGTCAAGACCATCCGCCAGCAGATCCTGGAGACGAGGGT**  
**GATCGGAACCTCAGAGACGCCCATCATCATCGTGGGCAACAAGCGGGACCTGCAGCGCGGACGCGTGATCC**  
**CGCGCTGGAACGTTGTCACCTGGTACGCAAGACCTGGAAGTGCGGCTACGTGGAATGCTCGGCCAAGTAC**  
**AACTGGCACATCCTGTCTCTTTCAGCGAGTCTCAAGAGCGTCCGGCTGCGCCCGTTGCAAGCACGTGCA**  
**CGCTGCCCTGCGCTTCCAGGGCGCGCTGCGCCGCAACCGCTGCGCCATCATGTGA****CGCCTGCGCGCCCTC**  
GGGCTGCACCGGCACTGGCCGAGCGGAGGGCGGGGCCGTAAGTGCAGGGGCTGGGGCGGGGAGCGGGCGGGAA  
ATGGAAGTGTGACGGTCCCGCCCTGAGGCCCTGCAGCCACGCACCTCCCGGTGAGAAGCAGAGCGCGAGA  
GGGAGCCCTCCGTAAGTGCAGCCCTGCCCCCTGCCCCCGTGGCTTCTGGGACAGCCGCCTTCCAGTGCT  
GTATTTAGTGCAGTGCAGCGCCGACCCGCGGGGTGCCACAGCCTTTTGGGATGGGGGTGAGCGTGCAAT  
GGAGGCTGGGGGTGGCGAGGTGCCGCCTTGGCCGGGCCCCACGTGTCTTCTCCAGAATGTGTCTGTCTTT  
GCCTGGTGTCTTCTTTCCCGTGTCCGCCCCACCCAGCGTCTGTTGGTACTTACCTGTCTCACCTACCCCTC  
CAGTCCCCTCCAGCTCCGCTCACAGGGCTCTCATTTTCGTCATCCCCTTGTGCGAGATCCTGGCAGCTTC  
TTTGTGAGGCCAGGCCTTCTGACTGTGAGCACCACCGGCACAGGGCAGAGATGCGGGTGGCCCAAGGACCA  
CGATCAAGGGGTCCGGGGGACCGAGGTCCAGATCAGTGAGGGGAGAAGGTTGAGCTCTCCGGCTTCCAGG  
GAGACCTCCCCGCCAGCAGCCCCAGAGACACAACAACCTACCTTCCAGCCTTAACTCGATGGTCCGTCC  
CTGCCAGGTGCCCTCACTCTTCCCTGACCCCAAAGCCAGATCACCCCTGGGTTAAAACCTTTTTTTCTTTT  
TTTTTTTTGGACAGAGTGTGGAAAGGGAGCCCCCAAAGGATAGCTTCTTTTTTCATGATGCCAGGCTCCAG  
TCCTTTATTCCCTTCTGCATACTGCAATCTGATCTGTGAGACTGGGGAATGTTGGGTTCTGGGGTCTGGTC  
GTGGGCAGGATGGTGCCAGAAGGGGTTAGGTTGTCCCAGTGAATAATTCTGTTGCCCGCTCTCAACCCCA  
TCTGACTACCCAGACTCTGCCTGCCTCAGATCTCAGACTATCCTGATTAATCTGGGGAAGAACAGAGCCA  
GGGAAAGAATGGTGGGGACCCCTGTACTTGGGGGAGACACACCTGCATCTTCTCTGCCAGATGGAGG  
CCCTCAGGATCTGACACCCCTTGTCCCAACACCAGTCAAGCCCTATACCCTAACTCACTCCACCCATTTT  
CTCCGGCTGCCTGGCCGGGTTTCTACCTCTCGTACCAGGCTGATCACTGTGAGTTTTGTACCGATTTAG  
AAATAACAATAATAATGAAGATTCTAGGAATGGCATGAGGGATTGATGGGGACTTGGAGGGAGGGACAAG  
TGGTGCCCTGTCCCTGCTCCCTGGCCAAAGAAAGCTGTCTTGGAGGCTGAGCCCTCAGCCCTGGCCTGG  
TGGGGGACAGCAAGGTCCCTTGTATAAGAGGGGAGAGAGGACAACCTCCGCTTGGCCAACCTAGCCAA  
GGCTGCAGCATATAGACCAGGAAATCAGGTAGCCAGACTGGTGTGAGGAGAGAGTCTGGGGGAAGGGTCG  
TGGGTGGGGAATTTATACCAACATCCATTGTAGGGGGAATCTATGATTCTGCTTCCCCAGCGGATTCCCA  
CTCTGTCCACCAAGTGGGGGTAGCACAGCCTCACAGCAACCGCCCTGACCTTGGGCAGTCTAGTGTTCCT  
GCATTCTAGTCCCTGCTGTGCTGCAGGACTTTGGGCAAGTACCTGCCCTCTGTGAGCCTCCCTCTGACAC  
AGAGGAGGTGGCTCCCCTTCCCCACACCTTAGAGTGGCTGGGAGGGTAACAAAGAGGGCCTGCCCTTTAG  
TCTCCTGCACCCCTGCCCTGGTTACCAGAGGGAGCGGATGAAGGATGGCAGCATCTCACATGCCCCAT

CACCAACTCTGAGGCACCTGGGGTGGGGGGGGCGGAGCCCAGGCCTCTGGCTGCTCCCCTGTGGGAGCCATT  
GGAATGTATCCCCTGACAGGCCCCCTTCCGCCTCCACCTCAACCCAGGTCTTGGATTTTCAGGTCCCTCCAC  
CCCCATTCTGAGTCTCTGTCTTCTCCTTCCACCCGCTCCCAGGGTTTCCCACCACAGGGTCTGGAAGTGT  
GTGTGACGCCATTGAGCTGTTACCCGAAGTCAGATTAATAAATCAGGGAGTGTTCCTCGTTTCTGTAA  
AAAAAAAAAAAAAAAAAAAA

LVLTVAEPPAPGICSPGEPQTAARTRWRSGAGGMVSTYRVAVLGARGVVGKSAIVRQFLYNEFSEVCPPTTA  
RRLYLPAVVMNGHVHDLQILDFFPISAFPVNTLQEWADTCCRGLRSVHAYILVYDICCFFDSFEYVKTIRQQ  
ILETRVIGTSETPIIIVGNKRDLRGRVIPRWNVSHLVRKTKWCGYVECSAKYNWHILLLLFSELLKSVGCA  
RCKHVHAALRFQALRRNRCAIM

AUG initiation = 23.2 kDa  
UUG initiation = 26.5 kDa

+++++

### #38

#### NM\_001080510

CUG initiation in most mammals. The extension is AUG initiated in mouse, rat and opossum. In addition, the downstream in-frame AUG is immediately preceded by out-of-frame AUG in perfect context which means in the downstream in-frame AUG is usually inaccessible. Delimiting upstream in-frame stop codons in *Macaca fascicularis*, *Procyon capensis*, *Rattus norvegicus* and *Sus scrofa*.

#### C17orf95 chromosome 17 open reading frame 95

(homology to AdoMet-dependent methyltransferases)

Synonyms: C17orf95

AGTTCTGCGCGTGTGAGTCTCTTTCGCCTTGCTCCGGGCTTTCTTTCGCTCGCAGCGCGGCAGGGTTATCAC  
CAGATCTGGGCTTTCCCCTTCTTGCCGTACAGGTGCTACGGCCACGTGGCCCCGGGCTTCCCCTCGCGCAG  
TCTGGCAGCCCCGAGCCTTCCGCGTCCCCACCCGCGGGGCCAACGACGCCCTACTGGGCGAGCACG  
ATTCCGAGGACAGGGGGTCCGGGCCAGCGCTTTCGATTCTCGGAGGAGCCGGGTCCGGGGCCGACGGG  
GCTGTCTGAGGTTCCAGTCCCAGGTCCTGCATCTCCAGTATGGAATGTATGTTTGGCCCTGTGCTGT  
GGTCCTGGCCAGTACCTTTGGTTTTACAGAAGATCTCTGCCAGGCAAGGCCATCTTAGAGATTGGAGCTG  
GAGTGAGCCTTCCAGGAATTTGGCTGCCAAATGTGGTGCAGAAGTAATACTGTCAGACAGCTCAGAACTG  
CCTCACTGTCTGGAAGTCTGTGCGCAAAGCTGCCAAATGAATAACCTGCCACATCTGCAGGTGGTAGGACT  
AACATGGGGTCATATATCTTGGGATCTTCTGGCTCTACCACCACAAGATATTATCCTTGCATCTGATGTGT  
TCTTTGAACCAGAAGATTTTGAAGACATTTTGGCTACAATATATTTTTTGGATGCACAAGAATCCCAAGGTC  
CAATTGTGGTCTACTTATCAAGTTAGGAGTGTGGCTGGTCACTTGAAGCTTTACTCTACAAATGGGATAT  
GAAATGTGTCCACATTCCTTCTGAGTCTTTTGGATGCAGACAAAGAAGATATAGCAGAATCTACCCTTCCAG  
GAAGACATACAGTTGAAATGCTGGTCATTTCTTTGCAAAGGACAGTCTCTGAATTATACCTACAACCTGT  
TCTGGGACAGTATCAATACTGATGAGCAACCTGGCACACAACTATGAGCAGACCACTTCAGCTTGAGAAT  
GCAGTGGGTCTGAAGATGGTCAAGTCTGTTTGCCTTAGATTTTGGATGTCACCTAGACAACACTTAAACTCA  
TATGAAACAAAAATTAATAATACGTATTACAAGTAAAAAAAAAAAAAAAAAAAA

LAARSLPRSPTRPGPNDAALLGEHDFRQGVRAQRFRFSEEPGPGADGAVLEVHVPQVLHLQYGMVYVWPCAV  
VLAQYLWFHRRSLPGKAILEIGAGVSLPGILAACKGAEVILSDSSELPHCLEVCRQSCQMNNLPHLQVVGL  
TWGHISWDLALPPQDIILASDVFFEPEDFEDILATIYFLMHKNPKVQLWSTYQVRSAGWSLEALLYKWD  
KCVHIPLESFDADKEDIAESTLPGRHTVEMLVISFAKDSL

PROBABILITY of export to mitochondria: 0.9710 with extension  
PROBABILITY of export to mitochondria: 0.4276 w/o extension

AUG initiation = 21.4 kDa

CUG initiation = 28.2 kDa

+++++

### #39

## NM\_023110

Likely ACG initiated extension in mammals

### FGFR1 fibroblast growth factor receptor 1

Synonyms: CEK; FLG; OGD; FLT2; KAL2; BFGFR; CD331; FGFBR; HBGFR; N-SAM; FLJ99988; FGFR1

AGATGCAGGGGCGCAAACGCCAAAGGAGACCAGGCTGTAGGAAGAGAAGGGCAGAGCGCCGGACAGCTCGG  
 CCCGCTCCCCGTCCTTTGGGGCCCGGCTGGGGAACAACAAGGCCAGCAGGCAGCTGCAGGGGGCGGAGG  
 CGGAGGAGGGACCAGCGCGGGTGGGAGTGAGAGAGCGAGCCCTCGCGCCCCGCGGCATAGCGCTCGGA  
 GCGCTCTTGCGCCACAGGCGCGGCTCCTCGGCGGGCGGCAGCTAGCGGGAGCCGGGACGCCGGTGC  
 AGCCGCAGCGCGGGAGGAACCCGGGTGTGCCGGGAGCTGGGCGGCCACGTCCGGACGGGACCGAGACCCC  
 TCGTAGCGCATTGCGGCGACCTCGCCTTCCCCGGCCGCGAGCGCGCCGCTGCTTGA<sup>AAAGCCGCGGAACCC</sup>  
 AAGGACTTTTCTCCGGTCCGAGCTCGGGGCGCCCCGAGGGCGCACGGTACCCGTGCTGCAGTCGGGCACG  
 CCGCGGCGCCGGGGCCTCCGACGGGCGATGGAGCCCGGTCTGCAAGGAAAGTGAGGCGCCGCCGCTGCGTT  
 CTGGAGGAGGGGGGCACAAGGTCTGGAGACCCCGGGTGGCGGACGGGAGCCCTCCCCCGCCCCGCTCCG  
 GGGACCAGCTCCGGTCCATTGTTCCCGCCCGGGCTGGAGGCGCCGAGCACCGAGCGCCCGGGGAGTCG  
 AGCGCCGGCCGCGGAGCTCTTGCACCCCGCCAGGACCCGAACAGAGCCCGGGGGCGGCGGGCCGGAGCCG  
 GGGACGCGGGCACACGCCCGCTCGCACAAAGCC<sup>ACGGCGGACTCTCCCGAGGCGGAACCTCCACGCCGAGCG</sup>  
<sup>AGGGTCAGTTTGA<sup>AAAGGAGGATCGAGCTCACTGTGGAGTATCCATGGAGATGTGGAGCCTTGTCAACCAAC</sup></sup>  
<sup>CTCTA<sup>ACTGAGAGCTGGGATGTGGAGCTGGAAGTGCCTCCTCTTCTGGGCTGTGCTGGTCACAGCCACAC</sup></sup>  
<sup>CTGCACCCGCTAGGCCGTC<sup>CCCCGACCTTGCCTGAACAAGCCAGCCCTGGGGAGCCCCGTGGAAGTGGAG</sup></sup>  
<sup>TCCTTCTGGTCCACCCCGGTGACCTGCTGCAGCTTCTGTGCGGCTGCGGGACGATGTGCAGAGCATCAA</sup>  
<sup>CTGGCTGCGGGACGGGTGACAGCTGGCGGAAAGCAACCGCACCCGCATCACAGGGGAGGAGGTGGAGGTGC</sup>  
<sup>AGGACTCCGTGCCCGCAGACTCCGGCCTCTATGCTTGCCTAACCAGCAGCCCTCGGGCAGTGACACCACC</sup>  
<sup>TACTTCTCCGTCAATGTTTTCAGATGCTCTCCCTCCTCGGAGGATGATGATGATGATGATGACTCCTCTTC</sup>  
<sup>AGAGGAGAAAGAAACAGATAACACCAAACCAAACCGTATGCCCGTAGCTCCATATTGGACATCCCCAGAAA</sup>  
<sup>AGATGGAAAAGAAATTGCATGCAGTGCCGGCTGCCAAGACAGTGAAGTTCAAATGCCCTTCCAGTGGGACC</sup>  
<sup>CCAAACCCACACTGCGCTGGTTGAAAAATGGCAAAGAATTCAAACCTGACCACAGAATTGGAGGCTACAA</sup>  
<sup>GGTCCGTTATGCCACCTGGAGCATCATAATGGACTCTGTGGTGCCTCTGACAAGGGCAACTACACCTGCA</sup>  
<sup>TTGTGGAGAATGAGTACGGCAGCATCAACCACACATAACAGCTGGATGTCGTGGAGCGGTCCCCTCACCGG</sup>  
<sup>CCCATCCTGCAAGCAGGGTTGCCCGCAACAAAACAGTGGCCCTGGGTAGCAACGTGGAGTTTATGTGTAA</sup>  
<sup>GGTGTACAGTGACCCGCAGCCGCACATCCAGTGGCTAAAGCACATCGAGGTGAATGGGAGCAAGATTGGCC</sup>  
<sup>CAGACAACCTGCCTTATGTCCAGATCTTGAAGACTGCTGGAGTTAATACCACCGACAAAGAGATGGAGGTG</sup>  
<sup>CTTCACTTAAGAAATGTCTCCTTTGAGGACGCAGGGGAGTATACGTGCTTGGCGGGTAACTCTATCGGACT</sup>  
<sup>CTCCCATCACTCTGCATGGTTGACCGTCTTGGAAAGCCCTGGAAGAGAGGCCGGCAGTGATGACCTCGCCCC</sup>  
<sup>TGTACCTGGAGATCATCATCTATTGCACAGGGGCCTTCTCATCTCCTGCATGGTGGGGTCCGTATCGTC</sup>  
<sup>TACAAGATGAAGAGTGGTACCAAGAAGAGTGACTTCCACAGCCAGATGGCTGTGCACAAGCTGGCCAAGAG</sup>  
<sup>CATCCCTCTGCGCAGACAGGTAACAGTGTCTGCTGACTCCAGTGCATCCATGAACTCTGGGGTTCTTCTGG</sup>  
<sup>TTCCGGCCATCACGGCTCTCCTCCAGTGGGACTCCCATGCTAGCAGGGGTCTCTGAGTATGAGCTTCCCGAA</sup>  
<sup>GACCCCTCGTGGGAGCTGCCTCGGGACAGACTGGTCTTAGGCAAACCCCTGGGAGAGGGTCTCTTGGGCA</sup>  
<sup>GGTGGTGTGGCAGAGGCTATCGGGCTGGACAAGGACAAACCAACCGTGTGACCAAAGTGGCTGTGAAGA</sup>  
<sup>TGTTGAAGTCGGACGCAACAGAGAAAGACTTGTGAGACCTGATCTCAGAAATGGAGATGATGAAGATGATC</sup>  
<sup>GGGAAGCATAAGAATATCATCAACCTGCTGGGGGCCTGCACGCAGGATGGTCCCTTGTATGTCATCGTGA</sup>  
<sup>GTATGCCTCCAAGGGCAACCTGCGGGAGTACCTGCAGGCCCGGAGGCCCCAGGGCTGGAATACTGCTACA</sup>  
<sup>ACCCCAGCCACAACCCAGAGGAGCAGCTCTCCTCCAAGGACCTGGTGTCTTGCCTACCAGGTGGCCCGA</sup>  
<sup>GGCATGGAGTATCTGGCCTCCAAGAAGTGCATACACCGAGACCTGGCAGCCAGGAATGTCTGGTGCAGAG</sup>  
<sup>GGACAATGTGATGAAGATAGCAGACTTTGGCCTCGCACGGGACATTACCACATCGACTACTATAAAAAGA</sup>  
<sup>CAACCAACGGCCGACTGCCTGTGAAGTGGATGGCACCCGAGGCATTATTTGACCGGATCTACACCCACCAG</sup>  
<sup>AGTGTGTGTGGTCTTTCGGGGTGTCTCTGTGGGAGATCTTCACTCTGGGCGGCTCCCATAACCCGGTGT</sup>  
<sup>GCCTGTGGAGGAACCTTTCAAGCTGCTGAAGGAGGGTCACCCGCATGGACAAGCCCAGTAACTGCACCAACG</sup>

AGCTGTACATGATGATGCGGGACTGCTGGCATGCAGTGCCCTCACAGAGACCCACCTTCAAGCAGCTGGTG  
GAAGACCTGGACCGCATCGTGGCCTTGACCTCCAACCAGGAGTACCTGGACCTGTCCATGCCCTGGACCA  
GTACTCCCCAGCTTTCCCGACACCCGGAGCTCTACGTGCTCCTCAGGGGAGGATTCCGTCTTCTCTCATG  
AGCCGCTGCCCCGAGGAGCCCTGCCTGCCCCGACACCCAGCCAGCTTGCCAATGGCGGACTCAAACGCCGC  
TGA

CTGCCACCCACACGCCCTCCCCAGACTCCACCGTCAGCTGTAACCCTCACCCACAGCCCCTGCTGGGC  
CCACCACCTGTCCGTCCCTGTCCCCTTTTCTGCTGGCAGGAGCCGGCTGCCTACCAGGGGCCTTCTGTGT  
GGCCTGCCTTACCCCACTCAGCTCACCTCTCCCTCCACCTCCTCTCCACCTGCTGGTGAGAGGTGCAAAG  
AGGCAGATCTTTGCTGCCAGCCACTTCATCCCCTCCCAGATGTTGGACCAACACCCCTCCCTGCCACCAGG  
CACTGCCTGGAGGGCAGGGAGTGGGAGCCAATGAACAGGCATGCAAGTGAGAGCTTCTGAGCTTTCTCCT  
GTCGGTTTGGTCTGTTTTGCCTTACCCATAAGCCCTCGACTCTGGTGGCAGGTGCCTTGTCTCAGGG  
CTACAGCAGTAGGAGGTCACTGCTTCTGTCCTGATTGAAGGTGACCTCTGCCCCAGATAGGTGGTGCCA  
GTGCGCTTATTAATTCGATACTAGTTTGTCTTGTGCTGACCAAATGCCTGGTACCAGAGGATGGTGAGGCGAA  
GGCCAGGTTGGGGCAGTGTGTGGCCCTGGGGCCAGCCCCAACTGGGGGCTCTGTATATAGCTATGAA  
GAAAACACAAAGTGTATAAATCTGAGTATATATTTTACATGTCTTTTTTAAAAGGGTCGTTACCAGAGATTTA  
CCCATCGGGTAAGATGCTCCTGGTGGCTGGGAGGCATCAGTTGCTATATATTTAAAAACAAAAAAGAAAAA  
AAGGAAAATGTTTTTAAAAGGTCATATATTTTTTGTACTTTTTGCTGTTTTATTTTTTAAATTATGTTT  
TAAACCTATTTTTCAGTTTAGGTCCCTCAATAAAAATTGCTGCTGCTTCATTTATCTATGGGCTGTATGAAA  
AGGGTGGGAATGTCCACTGGAAAGAAGGGACACCCACGGGCCCTGGGGCTAGGTCTGTCCCAGGGCACC  
CATGCTCCCGGCGCAGGTTCTTGTAACTCTTCTTCTTAGGTCCTGCACCCAGACCTCACGACGCACCTC  
CTGCCTCTCCGCTGCTTTTTGAAAAGTCAGAAAAGAAGATGTCTGCTTCCAGGGCAGGAACCCCATCCATG  
CAGTAGAGGCGCTGGGCAGAGAGTCAAGGCCCAGCAGCCATCGACCATGGATGGTTTTCTCCAAGGAAACC  
GGTGGGGTTGGGCTGGGAGGGGGCACCTACCTAGGAATAGCCACGGGGTAGAGCTACAGTGATTAAGAGG  
AAAGCAAGGGCGCGGTTGCTCACGCCTGTAATCCCAGCACTTTGGGACACCGAGGTGGGCAGATCACTTCA  
GGTCAGGAGTTTGGAGACCAGCCTGGCCAACCTTAGTGAAACCCCATCTCTACTAAAAATGCAAAAATTATCC  
AGGCATGGTGGCACACGCCTGTAATCCCAGCTCCACAGGAGGCTGAGGCAGAATCCCTTGAAGCTGGGAGG  
CGGAGGTTGCAGTGAGCCGAGATTGCGCCATTGCACTCCAGCCTGGGCAACAGAGAAAAACAAAAAGGAAAA  
CAAATGATGAAGGTCTGCAGAACTGAAACCCAGACATGTGTCTGCCCCCTCTATGTGGGCATGGTTTTGC  
CAGTGTCTTAAGTGCAGGAGAACATGTCACTGAGGCTAGTTTTTGCATTGAGTCCCTGGCTTCTGTTTTCT  
TGTTGGTATGCCTCCCGAGATCGTCTTCCCTGTATCCATGTGACCAGACTGTATTTGTTGGGACTGTCCGA  
GATCTTGGCTTCTTACAGTTCTTCTGTCCAAACTCCATCCTGTCCCTCAGGAACGGGGGGAAAAATTCTCC  
GAATGTTTTTGGTTTTTGGCTGCTTGGAAATTTACTTCTGCCACCTGCTGGTCATCACTGCTCCTCACTAAG  
TGGATTCTGGCTCCCCCGTACCTCATGGCTCAAACCTACCCTCCTCAGTCGCTATATTTAAAGCTTATATTT  
TGCTGGATTACTGCTAAATACAAAAGAAAGTTCAATATGTTTTTCACTTCTGTAGGGAAAATGGGATTGCTG  
CTTTAAATTTCTGAGCTAGGGATTTTTTGGCAGCTGCAGTGTGGCGACTATTGTAATAATTCTCTTTGTTT  
CTCTCTGTAATAGCACCTGCTAACATTACAATTTGTATTTATGTTTTAAAGAAGGCATCATTTGGTGAACA  
GAACTAGGAAATGAATTTTTAGCTCTTAAAAGCATTGCTTTGAGACCGCACAGGAGTGTCTTTCTTTGTA  
AAACAGTGATGATAATTTCTGCCTTGGCCCTACCTTGAAGCAATGTTGTGTGAAGGGATGAAGAATCTAAA  
AGTCTTCATAAGTCTTTGGGAGAGGTGCTAGAAAAATATAAGGCACTATCATAATTACAGTGATGTCTTTG  
CTGTTACTACTCAAATCACCCACAAATTTCCCCAAAGACTGCGCTAGCTGTCAAATAAAAGACAGTGAAT  
TGACCTGAAAAAAAAAAAAAAAAA

TADSPEAEPRRARVSLKRRIELTVEYPWRCGALSPTSNCRTGMWSWKCLLFWAVLVTATLCTARPSPTLP  
EQAQPWGAPEVEVESFLVHPGDLQLRCLRDDVQVINWLRDGVQLAESNRTRITGEEVEVQDSVPADSGLY  
ACVTSSPSGSDTTYFSVNVSDALPSSDDDDDDSSSEEKETDNTKPNRMPVAPYWTSPEKMEKKLHAVPA  
AKTVKFKCPSGTPNPTLRWLKNGKEFKPDHRIGGYKVRATWSIIMDSVVP SDKGNYTCIVENEYGSINH  
TYQLDVVERSPHRPILQAGLPANKTVALGNSVEFMCKVYSDPQPHIQWLKHIEVNGSKIGPDLNPYVQILK  
TAGVNTTDKEMEVLHLRNVSFEDAGEYTCLAGNSIGLSHSAWLTVLEALEERPAMVTSPLYLEIIIIYCTG  
AFLISCMVGSVIVYKMKSGTKKSDFHSMQMAVHKLAKSIPLRRQVTVSADSSASMNSGVLLVVRPRLSSSGT  
PMLAGVSEYELPEDPRWELPRDRLVLGKPLGEGCFGQVVLAEAIGLDKDKPNRVTKVAVKMLKSDATEKDL  
SDLISEMEMMKMIGKHKNIINLLGACTQDGPLYVIVEYASKGNLREYLQARRPPGLECYNPSHNPEEQLS  
SKDLVSCAYQVARGMEVYLSKCCIHRLAARNVLTEDNVMKIADFGGLARDIHHIDYKKTNTNGLRPLVKWM  
APEALFDRIYTHQSDVVSFVGLLWEIFTLGGSPYGPVVEELFKLLKEGHRMDKPSNCTNELYMMMRDCWH  
AVPSQRPTFKQLVEDLDRIVALTSNQEYLDLSMPLDQYSPSFPDTRSSTCSSGSDSVFSHEPLPEEPCLPR  
HPAQLANGGLKRR

AUG initiation = 91.9 kDa

ACG initiation = 96.7 kDa

+++++

### #40

## NM\_153369

CUG initiation conserved in mammals. Extension initiated by AUG in *Pteropus vampyrus* and *Loxodonta africana*. Curiously in mouse the first downstream in-frame AUG has become GUG. The next available in-frame AUG there is 48 codons further downstream.

### KIAA1919

Synonyms: NaGLT1; MGC33953

GATAGCGGTTGGCGAGAGGCCACATTTCCGCCACGTGACCCGCGCATGCGCCTGCTTGCTGGAGAGCGAGC  
 GTCTTTTGGCCACGAACACCTGCGGCGTGCCGAAGTTCCTCTTCTGCCCCGGTTCGGGGCGGTCCGCTGG  
 GAGTGGCGCCCGAGGGACACCCGTGCCTGGGGTCGGGGCCAGTGTCTTCTCGGAGCTCCAGAAGTTC  
 GCTGAAGAAGCGCGGCGGAGCAGCAAGACGACTTCTCCGAGCCGCCGAGCTGGAGTTAGAGGTGGAGCTCCGT  
 GGGCCCGGGCCCCGGCTGCGGGCAGCGGCTCCTGCAGGCGGAGGCCCGGCGGAGAATGAGCCGGAGCC  
 GGAGGTGGTGGTGGTCTCCTGGCAGAGCGGTGGACCGGGAGCAAGCTGCGGTGGTTACCACCTTGATGC  
 TGTGTGCCTCCTTCTGGGGCTGGGATTGAGTGTTGCTATAGTGGGACCCACGTTTCAAGATTTGGCAACA  
 AACGTGAACCGAAATATCAGTAGTCTGTCTTTTCAATTTTTGTGGGTGCTGCCTTGGGATATTTGAGTGGCTC  
 TGTGATTGGTGGATTTCTTGTGATGTGATGAATTATTTTTACTTTTGGGAATCTCAATGTCGGCTACCA  
 CCGTTGGTCTTTATCTTGTTCCTTTTTGCAAGACAGCAATATTACTCACTGTCATGATGTCTATCTTCGGT  
 GTTTCAATTGGCATTCTGGATACAGGTGGTAACGTCTTATCTTGGCTATTTGGGGGGACAAAGGAGCCCC  
 ACATATGCAGGCCTTACACTTCTCTTTGCTTGGGTGCCTTTTTGGCTCCACTGCTAGCTAAACTGGCTT  
 TGGGTCCGACAGCGTCTGCTGAAAACACACAGAGTCTGACTTCCATCCTGCACTCAACCAATCATCTGAT  
 GCTGACTCAGAAGCTCTGTTTGGAGTACCTAATGATAAGAATTTACTGTGGGCTTATGCTGTTATCGGTAC  
 TTACATGTTCTTAGTTTTCTGTCAATTTTTTTGTCTGTTTTTAAAGAATAGCTCAAAGCAAGAAAAAGCAA  
 GAGCATCTGCTGAGACATTTTCAAGAGCAAAATATCACAACGCCCTTCTTTGTCTCCTTTTTCTGTTCTTC  
 TTTTTTATGTTGGAGCTGAGGTAACATATGGCTCTTATGTTTTCTCATTTGCAACCACCCATGCTGGCAT  
 GAAAGAAAGTGAAGCTGCTGGGTTGAACTCCATCTTCTGGGGGACATTTGCAGCCTGCAGGGGCTGGCAA  
 TCTTTTTTGCTACCTGTTTACAGCCTGGAACCATGATTGTGTTGAGCAACATTGGCAGCCTGACTTCATCT  
 TTATTTCTGGTGTCTTTTGAACAAGAACCAATTTGTCTCTGGATAGCAACTTCAGTGTATGGGGCTTCAAT  
 GGCAACCACATTTCCGAGTGGTGTCTTGGATTGAGCAGTACACGACCATCCATGGGAAATCTTCAGGAAATAC  
 TTTTGTAAATGGTGTCTTCCCTGGGAGAAATGGCTATTTCTGCAGTCATTGGAATCTTCAAGGAAATAC  
 CCTGATTTGCCTGTAGTTCTGTATACCTCTTTGGGAGCATCAATAGCTACTGGTATTTTATTTCTGTGCT  
 ATATAAATTAGCCACTTCACCTCTTGATCGCCAGCGAAAAGAAGACAGAAAGAGTGAGGACCAGAAAGCTC  
 TGCTCTCTAGCTCCGGGCTAAATGAATATGAGGAAGAGAATGAAGAGGAGGATGCAGAAAAATGGAATGAA  
 ATGGATTTTGAATGATTGAAACGAATGATACAATGAGGCATTCTATAATAGAGACATCTAGAAGTAGTCT  
 GACGGAGCCACAGCTGAAGTCTATAATCAATACCCATCAAATGCACTGGTGTGTTGAGTCTTCTCCTTTTA  
 ATACTGGCAGTGCCCATGTGAAGCACTTGCCAGAAACCAGGACAAAAGGGACTAACGTTTAGAGAAGATGG  
 ATTACTCACTGACATCTTTGAATAACTGCCACTTCTAAGGACGCCATTTCAGAGCAGAGCATTAGCAGAATT  
 TCACCATGCTTTGGGGATTAATAATTTTAGGTCCATATTATAGCAAATGCTAAAAATTTTTGAAATGTTCT  
 GTAATTTCCAGAGTCTTCCATAAATAACCAAATGGTCTCATAACAGTACAATAGGATCTTGTATAACGCT  
 ATCATTTGACATGTGACTGATTAGGAAATATTTTATGGTCTCCACCCCTCAGAGCACCCAAAGAAGGCATT  
 GTTTTTGAGAAGGGGGGATTCTCAGAATGAGACCATGTAGGAGTTGAATTGATTGGTTGAACAAATTATC  
 AGGTATCAATATTTTTCCAGGAAAGTTGAGGAGAATAGTTTTATAAAAGAGAAATGGGCCGGGTGCAGTGG  
 CTAAAGCCTGTAATCCCAGCACTTTGGGAGGCCGAGACGGGCAGATCACGAGGTCAGGAGATCGAGACCAT  
 CCTGGCTAACACAGTGAACCCCTGTCTCTACTAAAAATACAAAAAATTAGCCAGGCGTGGTGGCAGGCACC  
 TGTAGTCCCAGCTACTTTGGGAGGCTGAGGCAGGAGAATGGCGTGAACCCGGGAGGTGGAGCTTGCAGTGAG  
 CCGAGATCATGCCACACCGTACTCCAGCCTGGGCGACATCTAGACTCCGTCTCAAAAAAGAAATGGAGAGG  
 TATTTTATTAATGCTTTACCTTATCTGTAGGGTGGATCAAAGAATGTAATGACTCATTGTATTTCTAA  
 TTCTCAATGAAGAAGACAGACAAGGGCCCAAGGGTTCGGGCTTCAAGCCTTGACTTCTTATGCCCTGCA  
 CTCTGTCACTTAACGTAGGCCTTGTATCTCGCCTCCTGATCTGTGATTCTAGAAATGAAAATGAGATGA  
 TTTCCAAATTGGGAATCTGTAAGTTTTAAAGTTTGTGCAAAATGTCTGCTAGAAATTAGTACAAGTGACAG

CATGTTCTTCATTTCAAATGAGAAGTGAAACCAAATGATAAATAGCTTTAAGAATGTGCTAATGATAAAT  
GATTACATGTCAATTTAATGTACTTAATGTTTAAATACCTTATTTGAATAATTACCTGAAGAATATATTTTT  
TAGTACTGCATTTTATTGATTCTAAGTTGCACTTTTTACCCCATACTGTAAACATATCTGAAATCAGAAT  
GTGTCTTACAATCAGTGATCGTTTAAACATTGTGACAAAGTTTAAATGGACAGTTTTTTCCCATATGTATATA  
TAAAATAATGTGTTTTACAATCAGTGGCTTAGATTGAGTGAATAACAGTAATTCATTCAATTATGATAGTA  
TCTTTACAGACATTTTAAAAATAAGTTATTTTTATATGCTAATATTCTATGTTCAAGTGGAAATTTGGAGAC  
ACTATGTTCTAATTTAAGAAGTGTTCAGTGTTATTAGATTAGTAGTAGGGCTGTAGATGGGGTCTTTTCG  
AGGTCCTTTGCCTACCTCAGTAACAGAGGCTGGGTCTGAGCCTTGCTCGAGATTAGCTCTTCACCAGGTCT  
GTGTGGTAATCATATCGTAGTTACCGTAGGTACGCTGCAAGTGTAATTTACAGTGAGGCATAGTCTTTTC  
CAGTGATTGGAATACTTGTGTACCGATCCAGGGTTTCTCTTTCCTGAGTCTGAAATACCTGGGAAACCAG  
TTAGAAGGTGACTGGGTAGCCTAGGAGTCAAGGATCAGAAAGGGTACTTCATATATATGTGGCAGAATTGG  
TGCAGGTGATCCTTTGAAAAATGACAAGAATTGATGAAATTTTGTCTTACTTCCCAATTTTTTGTGCTGAAT  
AACATCTCCTTTCTACCTGATTGGAGTAGGCTTGTCTTCTTACTTAATTTCTATAAATTTGCCATTGTT  
TTGTCTCAAGTAAAAAAAAAAAAA

LELEVELRGAGPPAAGQRLQLQAEAPAENEPEPEVVVSWQSGGTGSKLRWFTTLLMLCASFLGLGLSVAIVG  
PTFQDLATNVNRNIISSLSFIFVGRALGYLSGVSIGGLVDVMNYFLLLGISMSATTVGLYLVPFCKTAILL  
TVMMSIFGVSIGILDTGGNVLILAIWGDKGAPHMQUALHFSFALGAFLLAPLLAKLALGPTASAENHTESDFH  
PALNQSSDADSEALFGVPNDKNLLWAYAVIGTYMFLVSVIFFCLFLKNSSKQEKARASAETFRRAKYHNAL  
LCLLFLFFFYVGAEVTYGSYVFSFATTHAGMKESAAAGLNSIFWGTFAACRGLAIFATCLQPGTMIVLS  
NIGSLTSSLFLVLFDKNPICLWIATSVYGASMATTFPSGVSWIEQYTTIHGKSAAFFVIGASLGEAIPAV  
IGILQGKYPDLVVLYTSLGASIAATGILFPVLYKLATSPLDRQRKEDRKSEDQKALLSSSGLNEYEEENE  
EDA EKWNEMDFEMIE TNDTMRHSIIETSRSSLTEPTAEVYNQYPSNALVFESSPFNTGSAHVKHLPETRTK  
GTNV

AUG initiation = 56.2 kDa  
CUG initiation = 62.0 kDa

+++++

## #41

### NM\_001144886

CUG initiation conserved in mammals

**CITED1 Cbp/p300-interacting transactivator, with Glu/Asp-rich carboxy-terminal domain, 1**

Synonyms: MSG1; CITED1

AGAAGGGGCACCGCTGAGCTGCCGAGAGGAAGCTCGCTCTGCCCGGCTGCCCTCTTGTAGTCCGCCGGCGA  
GGGGCAGTTCTCGGTGAGGAGGAAGAGAGCAGCGGACGGCACAGCACCCGCGCGGGCCCTCCACAAACAGC  
TCCAGCTGGCAGCATCACTTCCCGCCAATTTATCCAATTTCTGCCAAGGCTCTGAAATGCCAACAAACGTG  
AGGCCTGCACTTGATGTCAAGGGTGGCACCTCACCTGCGAAGGAGGATGCCAACCAAGAGATGAGCTCCGT  
GGCCTACTCCAACCTTGCAGGTGAAAGATCGCAAAGCAGTGGCCATTCTGCACTACCCTGGGGTAGCCTCAA  
ATGGAACCAAGGCCAGTGGGGCTCCCCTAGTTCTCGGGATCTCCAATAGGCTCTCCTACAACCACCCCT  
CCCCTAAACCCCATCCTTCAACCTGCACCCCGCCCCTCACTTGCTGGCTAGTATGCACCTGCAGAACT  
TAATAGCCAGTATCAGGGGATGGCTGCTGCCACTCCAGGCCAACCCGGGGAGGCAGGACCCCTGCAAACT  
GGGACTTTGGGGCCCAGGCGGGAGGGGCAGAATCACTCTCTCTCTCTGCTGGTGGCCAGAGCCCTGCTATC  
ATCGATTCCGACCCAGTGGATGAGGAAGTGTGATGTGCTGGTGGTGGAACTGGGGTTGGACCGAGCCAA  
TGAGCTTCCGGAGCTGTGGCTGGGGCAGAATGAGTTTGACTTCACTGCGGACTTTCCATCTAGCTGCTAAAT  
GCCAAGTGTCCCTAAAGATGGAGGAATAAAGCCACCAATTCTGTTGTAATAAAAAATAAAGTTACTTACAA  
AGAGACGGGCCAAAAA

LAASLPANLSNFCQGSEMPPTSRPALDVKGGTSPAKEDANQEMSSVAYSNLAVKDRKAVAILHYPGVASNG  
TKASGAPTSSSGSPIGSPTTTPPTKPPSFNLHPAPHLASMLHLQKLNQYQGMAAATPGQPGEAGPLQNW  
FGAQAGGAESLSPSAGAQSPAIIDSDPVDEEVLMSLVVELGLDRANELPELWLGQNEFDFTADFPSSC

AUG initiation = 19.9 kDa  
CUG initiation = 21.6 kDa

+++++

#42

**NM\_006645**

Possible GUG initiation conserved in mammals

**STARD10 StAR-related lipid transfer (START) domain containing 10**

Synonyms: PCTP2; CGI-52; MGC14401; NY-CO-28; SDCCAG28; STARD10

CAAGCCGAGAGTCTCGGGATCGACACGTGGGGGCGCCTGAGCGAAGATAACCGTAATAAATAGTAACCTAA  
CGGTCCAGTCATCGTTCTGTGGTCCCTTTCTTTTATGATTACAAGGAATGACCCTCTTCATCGCCTCTCCT  
AATTCAGTCCTCACAACAGTCCTTTTACAAATGGGACAACAGGTTAGAGGAAGTCAGGCAGATTTCCAGCA  
TCATAGAGAGTAAAGACCAGGGAAGGATCAGGATTCAAGGACTGCACCCAGGCTCTGCTTCCAGCTTGCT  
GTGTGACTTTGGGTAATTTTGTTCCTTAGGGAACTGAGCTTTCTCATTTGTAAATGCAAACAGGCTGTTG  
GGAGGATCAAATGAGATCCAGGGGTGAAAACAGCTTAGTTTACTTTTCAGGAATTTACCCACGCGGTATATA  
AAGGCAAAATATTATTATAGTCAGGTGATTGTAGATTGAGGAACCCATTTCCCTCATTCTGCAAATTGCAA  
CCTGAGGGCCCAAAGAGGGACAGGGGCTTGCCCCAGGTCTCAGCAGGCTGTGAGCAAGAGCTAAAGCCTAA  
TCCTCCTGCCTTTGGGCCTGGAGCCCTTCTTGTACCCCAGGGGTGAGTGTCTTTGTTGGATACAGGCTTA  
GATTGACTGACTGTACCTTGAGAACCTAGGGGAGTCCCTGTTCCCAATTCTTCTCCTACCCACCTTGCC  
CTGATGGAGGAAGACCCTGCTGTGTTGAGATGAGCACCAGAGCCAAGAAGCTGAGGAGGATCTGGAGAATT  
CTGGAGGAAGAGGAGAGTGTGCTGGAGCTGTACAGACCCTGCTTCTCAGGTCCAGGAAGGTGGCGTCAG  
CATCTGCAGCCGCGTCGACGTTGTCTGGAGCCTCCGCGGAGGACCCAGGAGAGCCGGACTAGGACCAGGGCC  
CTGGGCCTCCCCACACTCCCCATGGAGAAGCTGGCGGCCTCTACAGAGCCCCAAGGGCCTCGGCCGGTCTCT  
GGGCCGTGAGAGTGTCCAGGTGCCCGATGACCAAGACTTTTCGCAGCTTCCGGTCAGAGTGTGAGGCTGAGG  
TGGGCTGGAACCTGACCTATAGCAGGGCTGGGGTGTCTGTCTGGGTGCAGGCTGTGGAGATGGATCGGACG  
CTGCACAAGATCAAGTGCCGGATGGAGTGTCTGTGATGTGCCAGCCGAGACACTCTACGACGTCCTACACGA  
CATTGAGTACC GCAAGAAATGGGACAGCAACGTCAATTGAGACTTTTGACATCGCCCGCTTGACAGTCAACG  
CTGACGTGGGCTATTACTCCTGGAGGTGTCCCAAGCCCCTGAAGAACCGTGATGTCATCACCCTCCGCTCC  
TGGCTCCCCATGGGCGCTGATTACATCATTATGAACTACTCAGTCAAACATCCCAAATACCCACCTCGGAA  
AGACTTGGTCCGAGCTGTGTCCATCCAGACGGGCTACCTCATCCAGAGCACAGGGCCCAAGAGCTGCGTCA  
TCACCTACCTGGCCAGGTGGACCCCAAAGGCTCCTTACCCAAGTGGGTGGTGAATAAATCTTCTCAGTTC  
CTGGCTCCCAAGGCCATGAAGAAGATGTACAAGGCGTGCCTCAAGTACCCCGAGTGGAAACAGAAGCACCT  
GCCTCACTTCAAGCCGTGGCTGCACCCGGAGCAGAGCCCCTTGCCGAGCCTGGCGCTGTCTGGAGCTGTCTGG  
TGCAGCATGCGGACTCACTGGAGAACATCGACGAGAGCGCGGTGGCCGAGAGCAGAGAGGAGCGGATGGGC  
GGCGCGGGCGGCGAGGGCAGCGACGACACCTCGCTCACC TGA GCGCCGCACCGCTTCAGGGACGGAGA  
CAGGACCGGGCGAGCCCTGGGGCGGCGGCCGCTCCTGCACCTTCTCCCCCTCCCCACCCGGCACCTGGTGG  
CACCGGGCCAGGCCAGGCGGGTGTCTGCAGCCTGGCTGGACAGAGCCCCAATAAACGATCCCACAGCCTCA

VASASAAASTLSEPPRRQTESRTRTRALGLPTLPM EKLAASTEPEQGRPVLGRESVQVPDDQDFRSFRSEC  
EAEVGNLTYSRAGVSVWVQAVEMDRTLHKIKRMECCDVPAETLYDVLHDI EYRKKWDSNVIETFDIARL  
TVNADVGYYSWRCPKPLKNRDVITLRSWLPMGADYIIMNYSVKHPKYPPRKDLVRAVSIQTGYLIQSTGPK  
SCVITYLAQVDPKGLPKWVVKSSQFLAPKAMKKMYKACLKYPEWKQKHLPHFKPWLHPEQSPLPSLALS  
ELSVQHADSLENIDESAVAESREERMGGAGGEGSDDDTSLT

AUG initiation = 33.0 kDa  
GUG initiation = 36.6 kDa

# B)

#1

## NM\_002097

Extension well conserved in vertebrates. CUG initiation conserved only in mammals.

GTF3A general transcription factor IIIA

Synonyms: AP2; TFIIIA; GTF3A

TGCGCGATCTCCCGGAGC**ATG**CGCAGCAGCGGCGCCGACGCGGGGCGGTGCCTGGTGACCGCGCGCGCTCC  
CGGAAGTGTGCCGGCGTCGCGCGAAGGTT**CAGCAGGGAGCCGTGGGCCGGGCGCGCCGGTTCCCGGCACGT**  
GTCTCGGCACGTGGCAGCGCGCCTGGCCCTGGGCTTGGAGGCGCCGGCGCC**CTGGATCCGCCGGCCGTGGT**  
**CGCCGAGTCGGTGTCTCCTTGACCATCGCCGACGCGTTTATTGCAGCCGGCGAGAGCTCAGCTCCGACCC**  
**CGCCGCGCCCCGCGCTTCCAGGAGGTTTCTCTGCTCCTTCCCTGACTGCAGCGCCAATTACAGCAAAGCC**  
**TGGAAGCTTGACGCGCACCTGTGCAAGCACACGGGGGAGAGACCATTTGTTTGTGACTATGAAGGGTGTGG**  
**CAAGGCCTTTCATCAGGGACTACCATCTGAGCCGCCACATTCTGACTCACACAGGAGAAAAGCCGTTTGT**  
**GTGCAGCCAATGGCTGTGATCAAAAATTCAACACAAAATCAAACCTGAAGAAACATTTTGAACGCAAACAT**  
**GAAAATCAACAAAAACAATATATATG**CAGTTTTGAAGACTGTAAGAAGACCTTTAAGAAACATCAGCAGCT  
GAAAATCCATCAGTGCCAGCATA**CCAATGA**ACCTCTATTCAAGTGTACCCAGGAAGG**ATGTGGGAAACACT**  
TTGCATACCCAGCAAGCTGAAACGAC**ATGCCAAGGCCACGAGGGCTATGTATGTCAAAAAGGATGTTCC**  
TTTGTGGCAAAAAC**ATGGACGGA**ACTTCTGAAAC**ATGTGAGAGAAACCATAAAGAGGAAATACTATGTGA**  
**AGTATGCCGAAAACATTTAAACGCAAAGATTACCTTAAGCAACACATGAAAAC**TCATGCCCCAGAAAGGG  
ATGTATGTGCGTGTCCAAGAGAAGGCTGTGGAAGA**ACCTATA**CAACTGTGTTTAATCTCCAAAGCCATATC  
CTCTCCTTCCATGAGGAAAGCCGCCCTTTTGTGTGTGAACATGCTGGCTGTGGCAAAAACATTTGCAATGAA  
ACAAAGTCTCACTAGGCATGCTGTTGTACATGATCCTGACAAGAAGAAAATGAAGCTCAAAGTCAAAAAAT  
CTCGTGAAAAACGGAGTTTGGCCTCTCATCTCAGTGGATATATCCCTCCCAAAGGAAACAAGGGCAAGGC  
TTATCTTTGTGTCAAAACGGAGAGTCA**CCCAACTGTGTGGAAGACAAGATGCTCTCGACAGTTGCAGTACT**  
**TACCCTTGGCTAA**GAACTGCACTGCTTTGTTTAAAGGACTGCAGACCAAGGAGCGAGCTTTCTCTCAGAGC  
ATGCTTTTCTTTATTTAA**AA**TTACTGATGCAGAACATTTGATTCTTATCATTTC

LDPPAVVAESVSLTIADAFIAAGESSAPTPPRPALPRRFICSPDCSANYSKAWKLD AHLCKHTGERPFV  
CDYEGCGKAFIRDYHLRHLTHTGKPFVCAANGCDQKFNTKSNLKKHFERKHENQKQYICSFEDCKKT  
FKKHQQLKIHCQHTNEPLFKCTQEGCGKHFASPSKLRHAKAHEGYVCQKGCFSVAKTWTPELLKHVRETH  
KEEILCEVCRKTFKRKDYLKQHM**K**THAPERDVCRCPREGCGRTYTTVFNLQSHILSFHEESRPVCEHAGC  
GKTFAMKQSLTRHAVVHDPDKKKMKLKVKK**S**REKRSLASHLSGYIPPKRKQGLSLCQNGESPNCVEDKM  
LSTVAVLTLG

+++++

#2

## NM\_001418

Region conserved from insects to human.

EIF4G2 eukaryotic translation initiation factor 4 gamma

Synonyms: P97; AAG1; DAP5; NAT1; FLJ41344; EIF4G2

GCAGACGGCAACCGGGCCGCTGATTGGGCGGCGAAGGAGCCATT**CGGGGAGACTCTGGTGGGTTCCGGCTGC**  
CCCAAGAGTGATAAGTTCGGCTT**CAGACACGCCTTAGCGCCAGCAGT**GAGTCGGAGCTCT**ATG**GAGGTGGC  
AGCGGGTACCGAGTGGCGGCTGCAGCAGCGACTCCTCTGAGCTGAGTTT**GAGGCCGTCCCCGACTCCTTCC**  
TCCCCCTTCCCTCCCCCTTTTTTTTTGTTTTCCGTTCCCTTTCCCTTCCCTTCCCTATCCCCGACGACCGG  
ATCCTGAGGAGGCAGCTGCGGTGGCAGCTGCTGAGTTCTCGGTGAAGGTATTT**CATTTCTCCTGTCCCCTC**

CCCTCCCCACCCCATCTATTAATATTATTCTTTTGAAGATTCTTCGTTGTCAAGCCGCCAAAAGTGGAGAGT  
GCGATTGCAGAAGGGGGTGCTTCTCGTTTCAGTGCTTCTTCGGGCGGAGGAGGAAGTAGGGGTGCACCTCA  
GCACTATCCCAAGACTGCTGGCAACAGCGAGTTCCTGGGGAAAACCCAGGGCAAACGCTCAGAAATGGA  
TTCCTGCACGAAGCACTAGACGAGATGACAACCTCCGCAGCAAACAACCTCCGCAAACGAAAAAGAACGACAT  
GATGCAATCTTCAGGAAAGTAAGAGGCATACTAAATAAGCTTACTCCTGAAAAGTTTTGACAAGCTATGCCT  
TGAGCTCCTCAATGTGGGTGTAGAGTCTAAACTCATCCTTAAAGGGGTGCATACTGCTGATTGTGGACAAAG  
CCCTAGAAGAGCCAAAGTATAGCTCACTGTATGCTCAGCTATGCTCTGCGATTGGCAGAAGATGCACCAAAC  
TTTGATGGCCCAGCAGCAGAGGGTCAACCAGGACAGAAGCAAAGCACCACATTGACACGCCTCCTAATTTT  
CAAATTACAAGATGAATTTGAAAACCGAACTAGAAATGTTGATGCTATGATAAGCGTGAAAATCCCCTCC  
TCCCCGAGGAGGAGGAACAGAGAGCCATTGCTAAGATCAAGATGTTGGGAAACATCAAATTCATTGGAGAG  
CTTGGCAAGCTTGATCTTATTACGAATCTATCCTTCATAAGTGCATCAAAACACTTTTGGAAAAGAAGAA  
GAGATCCAACCTCAAAGATATGGGAGAGGATTTGGAGTGCCTCTGTGAGATAATGAGGACAGTGGGACCTA  
GATTAGACCATGAACGAGCCAAAGTCTTAATGGATCAGTACTTTGCCCCGAATGTGCTCCTTGATGTTAAGT  
AAGGAATTGCCAGCAAGGATTCGTTTTCTGCTGCAGGATACCGTAGAGTTGCGAGAACACCATTGGGTTCC  
TCGCAAGGCTTTTTCTTGACAATGGACCAAAGACGATCAATCAAATTCGTCAAGATGCAGTAAAAGATCTAG  
GGGTGTTTTATTCTGCTCCTATGGCTCAAGGGATGAGAAGTGACTTCTTTCTGGAGGGACCGTTTCATGCCA  
CCCAGGATGAAAATGGATAGGGACCCACTTGGAGGACTTGTGATATGTTTGGACAAATGCCAGGTAGCGG  
AATTGGTACTGGTCCAGGAGTTATCCAGGATAGATTTTACCCACCATGGGACGTCATCGTTCAAATCAAC  
TCTTCAATGGCCATGGGGGACACATCATGCCTCCACACAATCGCAGTTTGGAGAGATGGGAGGCAAGTTT  
ATGAAAAGCCAGATTAGCCTGAGGCCTGCTCAGTCTGTTCTTAATGAATAAAAATCAAGTGCCAAAGCTTCA  
GCCCCAGATAACTATGATTCCTCCTAGTGCACAACCACCACGCACTCAAACACCACCTCTGGGACAGACAC  
CTCAGCTTGGTCTCAAAACTAATCCACCGCTTATCCAGGAAAAGCCTGCCAAGACCAGCAAAAAGCCACCA  
CCGTCAAAGGAAGAACTCCTTAAACTAACTGAAACTGTTGTGACTGAATATCTAAATAGTGAAATGCAAA  
TGAGGCTGTCAATGGTGTAAAGAGAAATGAGGGCTCCTAAACACTTTCTTCTGAGATGTTAAGCAAAGTAA  
TCATCCTGTCACTAGATAGAAGCGATGAAGATAAAGAAAAAGCAAGTTCTTTGATCAGTTTACTCAAACAG  
GAAGGGATAGCCACAAGTGACAACCTCATGCAGGCTTTCTGAATGTATTGGACCAGTGTCCCAAACCTGGA  
GGTTGACATCCCTTTGGTGAATCCTATTTAGCACAGTTTGCAGCTCGTGCCATCATTTCAGAGCTGGTGA  
GCATTTCAGAACTAGCTCAACCCTAGAAAAGTGGCACCCTTTTCTCTCTTCTACTTTTGTCTTTCAGCAG  
TTAGCTAAATTAAGATCGAGAATGGTTAACAGAACTTTTTCAACAAAGCAAGGTCAATATGCAGAAAAT  
GCTCCCAGAAATGATCAGAATAAGGACCGCATGTTGGAGATTTTGAAGGAAAGGGGACTGAGTTTCTTAT  
TCCCCTCCTCAAATTTGGAGAAGGAAGTGTGAAGCAAATAAAGTTGGATCCATCCCCTCAAACCATATAT  
AAATGGATTAAGATAACATCTCTCCCAAACCTCATGTAGATAAAGGATTTGTGAACATCTTAATGACTAG  
CTTCTTACAGTACATTTCTAGTGAAGTAAACCCCCCAGCGATGAAACAGATTTCATCCTCTGCTCCTTCCA  
AAGAACAGTTAGAGCAGGAAAAACAACCTACTACTATCTTTCAAGCCAGTAATGCAGAAAATTTCTTCATGAT  
CACGTTGATCTACAAGTCAGTGCCCTGTATGCTCTCCAGGTGCACTGCTATAACAGCAACTTCCCAAAGG  
CATGTTACTTTCGCTTTTTTGTGCACTTCTATGACATGGAAATATTGAAGAAGAAGCTTTCTTGGCTTGG  
AAGAAGATATAACCCAAGAGTTTCCGGGAAAAGGCAAGGCTTTGTTCCAGGTGAATCAGTGGCTAACCTGG  
TTAGAAACTGCTGAAGAAGAAGAATCAGAGGAAGAAGCTGACTAAAGAACCAGCCAAAGCCTTAAATTGTG  
CAAAACATACTGTTGCTATGATGTAAGTGCATTTGACCTAACCACTGCGAAAATTCATTCCGCTGTAATGT  
TTTCACAATATTTAAAGCAGAAGCAGTCAGTTAGGATTTCTTCTGCATAAGGTTTTTTTTGTAGTGTAAT  
GTCTTAATCATAGTCTACCATCAAATATTTTAGGAGTATCTTTAATGTTTAGATAGTATATTAGCAGCATG  
CAATAATTACATCATAAGTTCTCAAGCAGAGGCAGTCTATTGCAAGGACCTTCTTTGCTGCCAGTTATCAT  
AGGCTGTTTTAAGTTAGAAAACCTGAATAGCAACACTGAATACTGTAGAAATGCACCTTTGCTCAGTAATACT  
TGAGTTGTTGCAATATTTGATTATCCATTTGGTTGTTACAGAAAAATTTTAACTGTAATTGATGGTTGTT  
GCCGTAATAGTATATTGCCTGTATTTCTACCTCTAGTAATGGGCTTTATGTGCTAGATTTTAAATATCCTTG  
AGCCTGGGCAAGTGCACAAGTCTTTTTAAAAGAAACATGGTTTACTTGCACAAAACCTGATCAGTTTTGAGA  
GATCGTTAATGCCCTTGAAGTGGTTTTTGTGGGTGTGAAACAAATGGTGAGAATTTGAATTGGTCCCTCCT  
ATTATAGTATTGAAATTAAGTCTACTTAATTTATCAAGTCATGTTTCATGCCCTGATTTTTATATACTTGTAT  
CTATCAATAAACATTGTGATACTTGTATGATGTA

VESAI AEGGASRFSASSGGGSRGAPQHYPKTAGNSEFLGKTPGQNAQKWI PARSTRDDNSAANNSANEK  
ERHDAIFRKVRGILNKLTPKFDKLCLELLNVGVE SKLILKGVILLIVDKALEEPKYSSLYAQLCLRLAED  
APNFDGPAAEQPGQKQSTTFRLLI SKLQDEFENRTRNVVDYDKRENPLLPEEEEEQRAIAKIKMLGNIKF  
IGELGKLDL IHESI LHKCIKTLLEKKKRVQLKDMGEDLECLCQIMRTVGPRLDHERAKSLMDQYFARMCSL  
MLSKELPARIRFLLQDTVELREHHWVPRKAFLDNPGPKTINQIRQDAVKDLGVFIPAPMAQGMRSDFFLGEP  
FMPPRMKMDRDLPLGLADMFGQMPGSGIGTGPVGIQDRFSPTMGRHRSNQLFNHGGHIMPPTQSQFGEMG

KGFMKSQISLRPAQSFLMNKNQVPKLQPQITMIPPSAQPPRTQTPPLGQTPQLGLKTNPPLIQEKPAKTSK  
KPPPSKEELLKLTETVVTEYLNLSGNANEAVNGVREMRAPKHFLPEMLSKVIIISLDRSDEDKEKASSLISL  
LKQEGIATSDNFMQAFNLVLDQCPKLEVDIPLVKSYLEAQAARAIISELVSISELAQPLESQTHFPLFLLC  
LQQLAKLQDREWLTELQSKVNMQKMLPEIDQNKDRMLEILEGKLSFLFPLLKLEKELLKQIKLDPSPQ  
TIYKWIKNISPKLHVDKGFVNILMTSFLQYISSEVNPPSDETDSSSAPSKEQLEQEKQLLLSFKPVMQKF  
LHDHVDLQVSALYALQVHCYNSNFPKGMLLRFFVHFYDMEIEEEAFLAWKEDITQEFPGKGKALFQVNQW  
LTWLETAEEEESEEEAD

+++++

### #3

## NM\_001017371

Region highly conserved from zebrafish to human - the non-AUG initiation goes at least as far back as chicken.

### SP3 Sp3 transcription factor

Synonyms: SPR2; DKFZp686O1631; SP3

CCTCGCCCGCCTGCCGCCTTTTTGTGCGCGTGTGAGTGTGGGCCCCAGCGTGCCTCCCGGGGGTGGGTTCC  
CGGGCGGAAGGCGGAGGCCCGGCGCGCAGCCCGCCCGCCGCTGCCCGCGGACCGGGGAGCCGGGGTGTCTT  
GGAGCGGGGGACGCCAGGCGTGGGCTGGCGGGCGGGACCAGGAGGAGGAGGAGGAGGAGGAGGAGGAGCGCGG  
GCTGGCGCTTGCCCGGGCGCAGTCGGCGGGGACCGAGTCGTACTTCCTGTGCGAAAGGCGGCCCGACCCTA  
ACCGCCACCCCTCCCTGTCTCCCTCTCTGAACCCGCCATTGGGGGTAGGACACTCAGCCGTACCAGC  
TCGCTCTGCTGGCCGCTACCTGCAGCAAGATAGGGCCGCCATCGCCGGGCGACGACGAGGAGGAGGCGGCC  
GCCGCGCCGGGCCCCCGCCGCGCCGAGCAGCAGGTGATTTGGCTTCTGCACAGTTAGGAGGAGGACACC  
AAACCGATGGGAGGTTTTGTGACCCACACCTACAACATAAAAGATGAAGCTGGTAATCTAGTCCAGATTC  
CAAGTGTCTACTTCAAGTGGGCAGTATGTTCTTCCCTTTCAGAAATTTGCAGAATCAACAAATATTTTCC  
GTTGCACCAGGATCAGATTCATCAAATGGTACAGTGTCCAGTGTCAATATCAAGTGATACCACAGATCCA  
GTCAGCAGATGGTTCAGCAGGTTCAAATGGTTTTACAGGCTCTTCAGATAATGGGGTATAAATCAAGAAA  
GCAGTCAAATTCAGATCATTCTGGCTCTAATCAAACCTTACTTGCCTCTGGAACACCTTCTGCTAACATC  
CAGAATCTCATACCACAGACTGGTCAAGTCCAGGTTCCAGGAGTTGCAATTGGTGGTTCATCTTTTCTGG  
TCAAACCCAAGTAGTTGCTAATGTGCTCTTGGTCTGCCAGGAAATATTACGTTTTGTACCAATCAATAGTG  
TCGATCTAGATTCTTTGGGACTCTCGGGCAGTTCTCAGACAATGACTGCAGGCATTAATGCCGACGGACAT  
TTGATAAACACAGGACAAGCTATGGATAGTTCCAGACAATTCAGAAAGGACTGGTGAGCGGGTTTTCTCCTGA  
TATTAATGAAACTAATACTGATACAGATTTATTTGTGCCAACATCCTCTTCATCACAGTTGCCTGTTACGA  
TAGATAGTACAGGTATATTACAACAAAACACAAATAGCTTGACTACATCTAGTGGGCAGGTTTATTCTTCA  
GATCTTCAGGGAAATTATATCCAGTGCCTGTTTCTGAAGAGACACAGGCACAGAATATTAGGTTTCTAC  
AGCACAGCCTGTTGTACAGCATCTACAACCTCAAGAGTCTCAGCAGCCAACAGTCAAGCCAAATTTGTGC  
AAGGTATTACACCACAGACAATCCATGGTGTGCAAGCCAGTGGTCAAATATATCACAACAGGCTTTGCAA  
AATCTTCAGTTGCAGCTGAATCCTGGAACCTTTTTAATTCAGGCACAGACAGTGACCCCTTCTGGACAGGT  
AACTTGGCAAACGTTTCAAGTACAAGGGGTCCAGAATTTGCAGAATTTGCAAATACAGAATACTGCTGCC  
AACAAATAACTTTGACGCCTGTTCAAACCTCACACTTGGTCAAGTTGCGGCAGGTGGAGCCTTCACTTCA  
ACTCCAGTTAGTCTAAGCACTGGTCAAGTGTCCAAATCTACAAACAGTTACAGTGAATCTATAGATTCTGC  
TGGTATACAGCTACATCCAGGAGAGAATGCTGACAGTCTGCAGATATTAGGATCAAGGAAGAAGAACCTG  
ATCCTGAAGAGTGGCAGCTCAGTGGTATTCTACCTTGAATACCAATGACCTAACACACTTAAGAGTACAG  
GTGGTAGATGAAGAAGGGGACCAACAACATCAAGAAGGAAAAAGACTTCGGAGGGTAGCTTGCACCTGTCC  
CAACTGTAAAGAAGGTGGTGGAAAGAGGTACCAATCTTGGGAAAAAGAAGCAACACATTTGTATATACCAG  
GATGTGGTAAAGTCTATGGGAAGACCTCACATCTGAGAGCTCATCTGCGTTGGCATTCTGGAGAACGCCCT  
TTTGTGTTGTAAGTGGATGACTGTGGTAAAGATTTACTCGAAGTGATGAATTACAGAGGCACAGAAGAAC  
ACATACAGGTGAGAAGAAATTTGTTTGTCCAGAATGTTCAAACGCTTTATGAGAAGTGACCACCTTGCCA  
AACATATTAACACACCAGAATAAAAAAGGTATTCACTCTAGCAGTACAGTGCTGGCATCTGTGGAAGCT  
GCGCGAGATGATACTTTGATTACTGCAGGAGGAACAACGCTTATCCTTGCAAATATTCAACAAGGTTCTGT  
TTCAGGGATAGGAACTGTTAATACTTCCGCCACCAGCAATCAAGATATCCTTACCAACACTGAAATACCTT  
TACAGCTTGTACAGTTTCTGGAAATGAGACAATGGAGTAAATATTACACAAATACTTATTATTGTTGGTT  
ATTTTTTATACAGTAGTGAGAAGAATATTGTTCTTAAGTTCTTAGATATCTTTTTATTGATGTGCAAAAAT

TTTGGATTGACAGTAACTTGGTTATACATGACACTGAAATGCCTTACTTTGTATGATATTCCATAGTATAT  
TAAAAATGGTAAAATTGCATGGGTTTTGTAGGTACTTTTTGGAATCTAGAAGAAATGAAATTTTACCAAGTT  
ATATAAAGAGAAAATTGAATTTAACAATGCGAATGGTAGTCTAACCAAATGCATCAATCCTGTGTGGTTTA  
GTGTA AAAATGAGAACATGTTGGTATTTATCTATTGTAAGATAAAAAAGCTGGTGGGTGAAAGAAATCATG  
TTATGATAAAAAATTTTGTAAATTTCTTGATGACTGGAATTTTTATTATGCATAACTGACAAATCAAGTTT  
CCAAGCAAATGTTACATAGTGTAGGCTTTACTTAGCTTATCAATTTGTCATTTTGAAGCTAATTTTTAA  
TTAGGTAACTATGTACAATATTTTAAAGCATTACTCTTGTAAAGATTTTGA AAACTACATTTTAAACATGGAA  
CTCTAGGGATAGTCACCTTTTAAATCCTGTTGAAAAGCCATGTTTAAAGATTTAATTTGCCAAAATAATGTC  
TTGTTAATATTCTTTCAATAACGAAGTTGGGCAATATAACCAATGTTTAAAAAAGTTTAAAAATGTATAAGT  
TGAGGCATTTGGGTGGTAAGAGAATGTTATAGTGAATTATCCCTTTTCTTGACTATTGGAGGACCAAAAA  
ATAAGGTGTATTGCGTCTTAGCAGTGATTTTTATCCAATCTTGTTC AAAAACCATGTCTCCAGGCCT  
TAAAGCCATCATGTAAATTACCAGTAAAGTGAACATATGCAAACATAACAAAATCACTTCCATAGTGAC  
GATACTCCAACCATATGGATATTAGTCATAGAAGAACTAGAGGTTTTATGATATTTTTTTAAGTCTTTTTT  
TTTTTTGTCTAGGTAGTCAGTCTGCACTTAAATATCAATCATTTTCTTTTTTGTCTTCTCCCTTAAAT  
TATATGTATCCAGTACATTTAATTGAGAAGCGTATGTTTTTTATTATGCTGTATTTTTCTTTTTATTTTTTA  
ATTATTGTTTATATTTTCAATTC AAAATGTACAAAATAAAGTTACATTGCTGGTCTTGTAAAGAGCTATAC  
AGTTTTCTTAAATGTATACCTGTA ACTGCAGCAGTTCACCTATTTCAAAAATTTGGAATTTCTGTTCAATTTG  
TTATTCTTAAAGACCACCTCAAATTTAAAGGCTACCTTATTGTACGTTTAAAGTGTATTATAACAGTGTGGT  
AGTTAATAAAAACACTATTTTTTTTTCTTTTGA AAAAAAAAAAAAAAAAAAAAAAAAAAAAAAAAAAAAAA  
AAAA

IGPPSPGDDEEEAAAAGAPAAAGATGDLASAQLGGAPNRWEVLSATPPTTIKDEAGNLVQIPSAATSSGQY  
VLPLQNLQNLQIFSVAPGSDSSNGTVSSVQYQV I PQIQSADGQQVQIGFTGSSDNGGINQESSQIQIIPGS  
NQTLASGTPSANIQNLI PQTGQVQVQVQVAIGGSSFPQGTQVVANVPLGLPGNITFVPINSVDLDSLGLSG  
SSQMTAGINADGHLINTGQAMDSSDNERTGERVSPDINETNTD TDLFVPTSSSSQLPVTIDSTGILQQN  
TNSLTSSGQVHSSDLQGNYIQSPVSEETQAQNIQVSTAQPVVQHLQLQESQQPTSQAQIVQG ITPQTIHG  
VQASGQNISQQALQNLQLQNLNPGTFLIQAQTVTPSGQVTWQTFVQVQVQNLQNLQIQNTAAQQITLTPVQT  
LTLGQVAAGGAFSTSTPVSLSTGQLPNLQTVTVNSIDSAGIQLHPGENADSPADIRIKEEEPDPPEEWQLSGD  
STLNTNDLTHLRVQVVDDEGDQHQEGKRLRRVACTCPNCKEGGGRGTNLGKKKQHI CHIPGCGKVKYKTS  
HLRAHLRWHSGERPFVFNWMYCGKRFTRSEDLQRHRRHTTGEKKFVCPESKRFRMSDHLAKHIKTHQNKK  
GIHSSSTVLASVEAARDTLITAGGTTLILANIQQGSVSGIGTVNTSATSNDILNTNTEIPLQLVTVSGNE  
TME

+++++

### #3

## NM\_175886

Highly conserved throughout vertebrates and beyond but it looks like in all other species, including chimps, there is an AUG in place of the ACG – there is actually a human paralog on a different chromosome, much more common in the EST database, with AUG too.

### PRPS1L1 phosphoribosyl pyrophosphate synthetase 1-like 1

Synonyms: PRPS1; PRPS3; PRPSL; PRS-III; PRPS1L1

ATTAGAGTCTGTGCTTCACTTCCGTTCCAGCCTCAGCGGCAGCTGGATCGCTCGACGGAGTGCCTCTGGTA  
GTTGGCCAAAGACGCCGAATATCAAAATCTT CAGCGGCAGCTCCCACCAGGACTTATCCAGAAAATTGCTG  
ACCGCCTGGGCCTGGAGCTAGGCAAGGTGGTACTAAGAAATTCAGCAACCAGGAGACCTGCGTGGAAAT  
GATGAGAGTGTGCGTGGAGAGGATGCTACATCGTTCAGAGTGGTTGTGGCGAAATCAACGACAGTCTAAT  
CGAGCTTTTTGATCATGATTAATGCCTGCAAGATTGCTT CAGCTAGCCGAGTTACTGCAGTCATCCCATGCT  
TCCCTTATGCCCGACAGGATAAGAAGGATAAGAGCCGGTCCCAATCTCTGCCAAGCTTGTGCAAAATATG  
CTCTCTATAGCAGGTGCGGATCATATCATCACCATGGACCTACATGCTTCTCAAATTCAGGGCTTTTTTGA  
TATCCAGTAGACA ACTTGTATGCAGAGCCA ACTGTCTGAAGTGGATAAGGGAGAATATCCCTGAGTGGAA  
AGA ACTGCATTATTGTCTCGCCAGATGCTGGTGGAGCTAAAAGAGTGACCTCCATTGCAGACCAGTTGAAT

GTGGACTTTGCTTTGATTTCATAAAGAACGGAAGAAGGCCAATGAAGTGGACTGCATAGTGTCTAGTGGGAGA  
TGTGAATGATCGTGTGGCTATCCTTGTAGATGACATGGCAGACACTTGTGTTACAATCTGCCTCGCAGCTG  
ACAAACTTCTCTCAGCTGGAGCAACCAGAGTTTATGCTATCTTGACTCATGGAATCTTTTCTGGCCCAGCC  
ATTTCTCGCATCAACACTGCATGCTTTGAAGCAGTGGTAGTCACCAATACCATACCTCAAGATGAGAAGAT  
GAAGCATTGCTCCAAAATACGAGTAATTGACATCTCCATGATCCTTGCAGAAGCCATAAGGAGAAGCTCATA  
ATGGGGAATCTGTTTCTACCTGTTTCAGCCATGTTCTTTTAAACAGATAACTTCTAGGTTATGCTATTT  
TAAAATAAATAAGATTAATAAAAAA

TPNIKIFSGSSHQDLSQKIADRLGLELGLKVVTKKFSNQETCVEIDESVRGEDVYIVQSGCGEINDSLMELL  
IMINACKIASASRVTAVIPCFPYARQDKKDKSRSPISAKLVANMLSIAGADHIITMDLHASQIQGFFDIPV  
DNLYAEPTVLKWIWIRENIPEWKNCIIVSPDAGGAKRVTSIADQLNVDFALIHKERKKANEVDCIVLVGDVND  
RVAILVDDMADTCVTICLAADKLLSAGATRVYAILTHGIFSGPAISRINTACFEAVVVNTNIPQDEKMKHC  
SKIRVIDISMILAEAIRRTHNGESVSYLFSHVPL

+++++

#5

NM\_003213

Region and non-AUG initiation conserved from zebrafish to human.

**TEAD4 TEA domain family member 4**

Synonyms: TEF3; RTEF1; TEF-3; EFTR-2; TEFR-1; MGC9014; TCF13L1; hRTEF-1B;  
TEAD4

GTGGCCCCGCCGCGCCACTCCCTCCGGCTCCCTCCCTCCCGCCGCGGGCGCGCATCTCATTCCAGCCCTCATTCC  
CGCGCATTCCAGCGTCTCCTCGCACACTCGAGGCCAGGGGGCGGGAGGGCCGAGCTCCGGCGCCGCCGC  
GTCCC GCCAGAACGATCGCCGCGGCCGGAAGAGTTGGCGCTCGGGGCGGACTCCTTGGAACTGGCTTAGCG  
CACCCATCCCACCTTCCCGCACCTGGGACCGGTCCAACGAGCGCTCCTCCAAGCGGAGCCTTGGAGGGCA  
CGGCCGCCACCATTACCTCCAACGAGTGGAGCTCTCCACCTCCCTGAGGGGAGCACCGCCTCTGGGGGC  
AGTCAGGCACTGGACAAGCCATCGACAATGACGCAGAGGGCGTGTGGAGCCCGGATATTGAGCAGAGTTT  
CCAGGAGGCCCTCGCCATCTACCCGCCCTGTGGCAGGCGCAAATCATCCTGTCTGGACGAGGGCAAGATGT  
ATGGTCGGAACGAGCTGATTGCCCGCTACATCAAGCTCCGGACAGGGAAGACCCGCACCAGGAAGCAGGTC  
TCCAGCCACATCCAGGTGCTGGCTCGTCGCAAAGCTCGCGAGATCCAGGCCAAGCTAAAGGACCAGGCAGC  
TAAGGACAAGGCCCTGCAGAGCATGGCTGCCATGTCGTCTGCACAGATCATCTCCGCCACGGCCTTCCACA  
GTAGCATGGCCCTCGCCCGGGCCCCGCGCCAGCAGTCTCAGGGTTTTGGCAAGGAGCTTTGCCAGGC  
CAAGCCGGAACGTCCCATGATGTGAAGCCTTCTCTCAGCAAACCTATGCTGTCCAGCCTCCGCTGCCTCT  
GCCAGGTTTGGAGTCTCCTGCAGGGCCCCCAGCCTCTCGCCCCCGGCACCCCCATGGCAGGGCC  
GCAGCGTGGCCAGCTCCAAGCTCTGGATGTTGGAGTCTCTCGCTTCTGGAGCAGCAGCAGGACCCGGAC  
ACGTACAACAAGCACCTGTTCTGTCACATTTGGCAGTCCAGCCCAAGCTACAGCGACCCCTACCTCGAAGC  
CGTGGACATCCGCCAAATCTATGACAAATCCCGGAGAAAAAGGGTGGACTCAAGGATCTCTTGAACGGG  
GACCCTCCAATGCCTTTTTTCTTGTGAAGTTCTGGGCAGACCTCAACACCAACATCGAGGATGAAGGCAGC  
TCCTTCTATGGGGTCTCCAGCCAGTATGAGAGCCCCGAGAACATGATCATCACCTGCTCCACGAAGGTCTG  
CTCTTTCCGCAAGCAGGTGGTGGAGAAAGTTGAGACAGAGTATGCTCGCTATGAGAATGGACACTACTCTT  
ACCGCATCCACCGGTCCCCGCTCTGTGAGTACATGATCAACTTCATCCACAAGCTCAAGCACCTCCCTGAG  
AAGTACATGATGAACAGCGTGTGGAGAACTTACCATCCTGCAGGTGGTCAACAACAGAGACACACAGGA  
GACCTTGCTGTGCATTGCCTATGTCTTTGAGGTGTGAGCCAGTGGACACGGGGCTCAGCACCATCTACA  
GGCTGGTGAAGAATGAGAGACTCGGGGAGCAGGGAGGGGGGAAGAGACGTGTGTGCAGGAAACGGGGACG  
TGGGGAGGGGACCTGCAGGGGCGACCCCTGAAGTGCCAAGAGAGCTGAGAGGAGCAGTTGTGACTCTACC  
CAGGAACAAACTGTGCCTGAACCTGAGGTGCCCAACCCCAATAAACCCCAAGATGCTGTGTATTTTCAGAG  
GAAAA

LEGTAGTITSNEWSPTSPEGSTASGGSQALDKPIDNDAEGVWSPDIEQSFQEALAIYPPCGRRKIILSDE  
GKMYGRNELIARYIKLRTGKTRTRKQVSSHIQVLARRKAREIQAKLKDQAAKDKALQSMAMSSAQIISAT  
AFHSSMALARGPGRPAVSGFWQALPGQAGTSHDVKPFSQQTYAVQPPLPLPGFESPAGPAPSPSAPPAPP

WQGRSVASSKLWMLFSAFLEQQQDPDTYNKHLFVHIGQSSPSYSDPYLEAVDIRQIYDKFPEKKGGLKDL  
FERGSPNAFFLVKFWADLNTNIEDEGSSFYGVSSQYESPENMIITCSTKVCSTFGKQVVEKVETERYENG  
HYSYRIHRSPLCEYMINFIHKLKHLPEKYMMNSVLENFTILQVVTNRDTQETLLCIAVFEVSASEHGAQH  
HIYRLVKE

+++++

#6

NM\_003214

Region and non-AUG initiation conserved from zebrafish to human.

TEAD3 TEA domain family member 3

Synonyms: TEF5; TEAD5; TEF-5; DTEF-1; ETRF-1; TEAD3

TCCTCAACACAAACTTTCCGTCCTCCGCTCCCTCCTCCGCGCTCGGCGCCTCCCGCTCCAGCCCGGCTC  
ATTCGCGACATTCCGGCCAGCCCCCTCCCCACGACCCCCCTTCCCGGCCCCCTTGCAGGCTCCCTCGGGC  
CCGGCCGAGCGGCCCGGCCGAGCGCCCCGCGAGCTCGGACCAGGCTCAGCCGCCAGTGGGCTCAGGCC  
CAGAGCCAGAGCAACCAGCACAATAGCGTCCAACAGCTGGAACGCCAGCAGCAGCCCCGGGGAGGCCCGG  
GAGGATGGGCCCGAGGGCCTGGACAAGGGGCTGGACAACGATGCGGAGGGCGTGTGGAGCCCGACATCGA  
GCAGAGCTTCCAGGAGGCCCTGGCCATCTACCCGCCCTGCGGCCGGCGGAAGATCATCCTGTGACAGGAG  
GCAAGATGTACGGCCGAAATGAGTTGATTGCACGCTATATTAACCTGAGGACGGGGAAGACTCGGACGAGA  
AAACAGGTGTCCAGCCACATACAGGTTCTAGCTCGGAAGAAGGTGCGGGAGTACCAGGTTGGCATCAAGGC  
CATGAACCTGGACAGGCTCCAAGGACAAAGCCCTTCAGAGCATGGCGTCCATGTCTCTGCCAGATCG  
TCTCTGCCAGTGTCTGCAGAACAAAGTTTCCAGCCACCTTCCCCTCTGCCCCAGGCCGTCTTCTCCACTTCC  
TCGCGGTTCTGGAGCAGCCCCCTCTCCTGGGACAGCAGCCTGGACCCTCTCAGGACATCAAGCCCTTTC  
ACAGCCAGCCTACCCCATCCAGCCGCCCTGCGCCGACGCTCAGCAGTTATGAGCCCTGGCCCCGCTCC  
CCTCAGCTGCTGCCTCTGTGCCTGTGTGGCAGGACCGTACCATTGCCTCCTCCCGGCTGCGGCTCCTGGAG  
TATTCAGCCTTCATGGAGGTGCAGCGAGACCCTGACACGTACAGCAAACACCTGTTTGTGCACATCGGCCA  
GACGAACCCCGCTTCTCAGACCCACCCCTGGAGGCAGTAGATGTGCGCCAGATCTATGACAAATTCCCCG  
AGAAAAAGGGAGGATTGAAGGAGCTCTATGAGAAGGGGCCCTAATGCCTTCTTCTTGTCAAGTTCTGG  
GCCGACCTCAACAGCACCATCCAGGAGGGCCCGGGAGCCTTCTATGGGGTCACTCTCAGTACAGCTCTGC  
TGATAGCATGACCATCAGCGTCTCCACCAAGGTGTGCTCCTTTGGCAAACAGGTGGTAGAGAAGGTGGAGA  
CTGAGTATGCCAGGCTGGAGAACGGGCGCTTTGTGTACCGTATCCACCGCTCGCCCATGTGCGAGTACATG  
ATCAACTTCATCCACAAGCTGAAGCACCTGCCCGAGAAGTACATGATGAACAGCGTGTGGAGAAGTTCCAC  
CATCCTGCAGGTGGTCCAGAGCCGGGACTCCCAGGAGACCCTGCTTGTGCTTTTGTCTTTCGAAGTCT  
CCACCAGTGAGCACGGGGCCAGCACCATGTCTACAAGCTCGTCAAAGACTAGGGTGCCTCTGCGCCTCC  
TTAAGGATGCAGGGTGCAGCATCTCCTCTCCACACCTGCCTGGCACCCTGGGGGGTCCAGGATTGAGGAT  
TCATCTACCTGCCAGGCCTCAGGCCAGGACCAGGAGGCCTCCCCACCTACCCAGCACACACTCCCT  
GCCACTGTTCTGCGCTTTAATTGTGGGAGAAGAGAGGAGAGGAGGGCTCAGCGGTGGGGCAGCCTGTCCGG  
GGCGCTGACCCACCATACCCTGCTCTGCCAGCCTCGCGTGACCTCAGAGAGGTGGGGATAGGGGACACC  
TTCAGCCTCCAGCATGTGTGGCCACTGTACCCCAACCCCTTGGGGGAGCATGATGGGCAGGTGAGGGC  
AGGATGGAGACCAAGGGAGTCACTGAGCAGAGGCCCTGGGAGTGTCCGGTTGGGGTTGGACTGAGGACAGA  
GGGGCCACACTTCTTGGCCCTTTGTGTCCAGGCCTGGTGCCAGACTCCTTGCATGGCTTGTGTGGTC  
CTCAGACTCCGCACAGCGAGCGTAGGTCTCTGGGTTTTAGATGAAGTGCCAGGCTCCAGGAAGTTGAGGG  
ACCCACAGGAGAGGTGGGCAGAGCTGGAGTTCTCATCCAGGGCTGCTTGTCCCCAGAGCCCAGGTTTATAC  
TACCTCCCTGGGGCGGGGCTGGCCGAGGGTAGGGGAGAGGCTCTGCAGTGTGGAGTGGAGCCTCATCGA  
GGGGCGCTGGGTTAGGGGAGCACCTGTTTTCAGACTGGGCATGAAGAAGGGAGCACAGCAGCTACTAGACCC  
CATTAGCACCTCATTAGCCACAAGCCAGCCAGGGGCCCCAGGAAGATGGGGCACCCCCAGCACCCCTCCA  
GATTGAGAGCAAGGTAGAGGAAGGAGTCCAGCCTCTGGGCAGACCAGAGGCCAGAGGGGAGAGAGTAGCA  
GAAGGCTTTTGTATTTTCTCTTGCCTGAGGCTTGAATCTGACAAACCCTTGGTGGGCACTGCTCCCTTAGG  
TTCTTCCCCACCTCAATCTACCTGCCTAGAGTAGCAGCTCCAGACCCAGTTCTGGGACTGAAGGTTAACC  
CTTACCTGCTGTCCCTTCTTAACACCCAGGCCCCAGAGCCAGCTGGGCCTGTCCAGCAGCCACCTGTGG  
GTATTTATGAGTTTCATATGAAGTACTGTGCCCTTCCCTTCCCTCATCCCGACCCTGCCCGAGCTTCCCTGA  
AGGTCTCCTACTGTTTGCATATCGCTCAGGCCACCTCCAAACCCACCTAGGTTTTATAATGTATATTATAT  
ATTTTTTTGTGTATTTTTTAAAATCCAGCTGTGATGGGTTATATCATAAATGCAGCTTGGGGTTGGAGCAGG

GGCCCTCAAAGGCCAGCTCCTGCTCAAAAAAAAAAAAAAAAAAAAAAAAAAATTAAAGTTATTTGTTTGTGGGTCA  
GTCATGTAAAAAAAAAAAAAAAAAAAAAAAAAAAAAAAAAAAAA

IASNSWNASSSPGEAREDPGLDKGLDNDAEGVWSPDIEQSFQEALAIYPPCGRRKIILSDEGKMYGRNE  
LIARYIKLRTGKTRTRKQVSSHIQVLARKKVREYQVGIKAMNLDQVSKDKALQSMASMSAQIVSASVLQN  
KFSPPSPLPQAVFSTSSRFWSSPPLLGQQPGPSQDIKPFAPAYPIQPPLPPTLSSYEPLAPLPSAAASVP  
VWQDRTIASSRLRLLEYSAFMEVQRDPDTYSKHLFVHIGQTNPAFSDPPEAVDVRQIYDKFPEKKGGLKE  
LYEKGPPNAFFLVKFWADLNSTIQEGPGAFYGVSSQYSSADSMTISVSTKVCSEFGKQVVEKQVETEARLEN  
GRFVYRIHRSPMCEYMINFIHKLKHLPEKYMNSVLENFTILQVVTSRDSQETLLVIAFVFEVSTSEHGAQ  
HHVYKLVKD

+++++

#6

## NM\_031895

Conserved in vertebrates though in some fish initiated at AUU while others at AUG,  
though the AUG initiated one might be another paralog.

### CACNG8 calcium channel, voltage-dependent, gamma subunit 8

Synonyms: CACNG8

CCCCGCTTCTGCCTGCGCTGTGAACCCCCCCCCAGCCGCCGGCACGGCCCCGCCCGCTGCCCGGTGGT  
GGCCACGGCCCCCGGCTGCCCGTGGTCAAACTGGAGTCGCTGAAGCGCTGGAACGAAGAGCGGGGCCTC  
TGGTGCAGAGAAGGGGGTGCAGGTGCTGCTGACGACGGTGGGCGCCTTCGCCCTTCGGCCTCATGACCAT  
CGCCATCAGCACTGACTACTGGCTCTACACGCGCGCCCTCATCTGCAACACCACCAACCTCACGGCCGGCG  
GCGACGACGGGACCCCCACCGCGGGGGCGGGCGGCCTCGGAGAAGAAGGACCCCGCGGCCTCACGCAC  
TCGGGCCTCTGGAGGATCTGCTGCCTGGAAGGGTTGAAAAGAGGCGTCTGCGTGAAGATCAATCATTCCC  
GGAGGACACGGACTACGACCACGACAGCGCGGAGTATCTACTCCGAGTTGTCCGGGCCTCCAGCATCTTCC  
CCATCCTTAGCGCCATCCTGCTGCTGCTCGGGGGTGTGTGCGTGGCGGCCTCCCGCTTACAAGTCCAAG  
AGGAACATCATTCTGGGCGCAGGGATCCTGTTTCGTGGCAGCAGGCCTGAGCAACATCATCGGCGTGATCGT  
GTACATCTCCGCCAACGCGGGCGAGCCGGGCCGAAGCGGGACGAGGAGAAGAAAAACACTACTCGTACG  
GCTGGTCCTTCTACTTCGGCGGGCTGTCTGTTTATCCTGGCCGAGGTGATAGGCGTGTGGCCGTCAACATC  
TACATCGAGCGCAGCCGCGAGGCGCACTGCCAGTCTCGCTCGGACCTGCTCAAGGCCGGCGGGGGCGCGG  
CGGCAGTGGCGGGAGCGGCCCTCGGCCATCCTCGTCTGCCAGTTACCGCTTCCGCTACCGCCCGCT  
CCCGCTCTAGCTCCCGCTCCAGCGAGCCGTGCGCGTCCGCGGACGCGTCTCCCGCGGCCCGGGGGCCG  
GGCTTTGCCTCCACGACATCTCCATGTACACGCTCAGCCGCGACCCCTCCAAGGCAGCGTGGCCGCGGG  
GCTGGCGGGGGCCGGCGGGCGGGCGGCCTGGGGGCGTTCGGCGGGCGGGCCGGGGCGCCGGGG  
GCGGGCGGAGGCGGGCGGGCGGGTCCGAGCGGGACCGGGGGGGCGTCCGGCTTCTCACGCTG  
CACAACGCCTTCCCCAAGGAGGCGGGCGGGCGGCTCACGGTCACGGTCACCGGGCCGCCCGCCCCGCGC  
GCCCCGCGCCACCGCGCCCTCTGCGCCCGCCCCGGGACCCTGGCCAAGGAGGCGCGCCTCCAACACCA  
ACACGCTCAACAGGAAAACCACGCCTGTGTAGGGCGGGCGGGGGAGCCGAGGGGCGTGTCCGGGGC

LES�KRWNEERGLWCEKGVQVLLTTVGAFAAFGLMTIAISTDYWLYTRALICNTTNLTAGGDDGTPHRGGG  
GASEKKDPGGLTHSGLWRICCLEGLKRGVCVKINHFPEDTDYDHDSA EYLLRVVRASSIFPILSAILLLG  
GVCVAASRVYKSKRNIILGAGILFVAAGLSNIIGVIVYISANAGEPGPKRDEEKKNHYSYGSFYFGGLSF  
ILAEVIGVLAVNIYIERSREAHQSRSDLLKAGGGAGSGSGPSAILRLPSYRFRYRRRSRSSRSSEPS  
PSRDASPGGPGGPGFASTDISMYTLSRDPSKGSVAAGLAGAGGGGGGAVGAFGGAAGGAGGGGGGGGAGA  
ERDRGGASGFLTLHNAFPKEAGGGVTVTVTGPPAPPAPAPPAPSAPAPGTLAKEAAAANTNTLNKRTTPV

+++++

#8

**NM\_016178**

CUG initiation well conserved in mammals.

**OAZ3 ornithine decarboxylase antizyme 3**

Synonyms: AZ3; OAZ-t; TISP15; OAZ3

GTTGCCTAAACCTCTGCCACCCACCTGTGAACTTCACTTTGCCACAGGGAGGCACCTGAACTGAAAACTGC  
CTTGTAAGAGGTGTGCGCCCTCTGTCTACTCCCTTTCTTATATCAAGAGGGGAAAAACACGTAACCTACCTC  
TACCCGATCTGGTCACCATACGCCTATTACCTTTACTGTTACAAGTACCGGATCACTCTCCGGGAGAAGAT  
GCTGCCTCGTTGTTATAAAAGCATCACTTATAAGGAAGAGGAGGACTTGACACTCCAGCCCCGTTCCCTGCC  
TCCAGTGCTCCTGAGTCCCTAGTAGGCCTCCAGGAGGGCAAAAGCACCGAGCAGGGTAACCACGACCAGCT  
TAAAGAACTGTATTCCGGCTGGGAACTTGACGGTGTGGCTACTGACCCCTGCTCCACCAGGACCCAGTAC  
AGTTAGACTTTCACTTCCGCCTTACCTCCCAGACCTCTGCCATTGGCACGGCCTTCTCTGTGACCGTCA  
CTCTTCCCTGGATATCCCATATCAGGCCTTGGATCAAGGCAACCGGGAAAGTTTGACTGCAACCCTGGAGTA  
CGTGAAGAGAAGACAATGTGGACTCTGTGTTGTGAACTTCCAGAATGATCGGAACGACAGAGGTGCC  
TGCTGCGGGCCTTCAGCTACATGGGCTTTGAGGTGGTCCAGACCAGATCACCTGCCCTCCCTCCCTTGGAC  
AATGTCATCTTTATGGTGTATCCCCTTGAAAGGGATGTTGGCCACCTGCCCAGTGAGCCTCCTTGAACATG  
CTTATTCCAACGCTTTGAGGGGCTGGAAGCCTTGACACATGGAATCAGGGGCCCCGGGATGTGATTCCAGGAC  
ACTTTCCATCCTAGGAATAAAGGGTAGTGCAATCAAAAAAAAAAAAAAAAAA

LPCKRCRPSVYLSYIKRGKTRNYLYPIWSPYAYLYCYKYRITLREKMLPRCYKSITYKEEDLTLQPRS  
CLQCSESLVGLQEGKSTEQGNHDQLKELYSAGNLTVLATDPLLHQDPVQLDFHFRLTSQTSAHWHGLLCDR  
RLFLDIPYQALDQGNRESLTATLEYVEEKTNVDSVFNFNQDRNDRGALLRAFSYMGFEVVRPDHPALPLP  
DNVIFMVYPLERDVGHLPEPP

+++++

#9

**NM\_021961**

Region and non-AUG initiation conserved from zebrafish to human.

**TEAD1 TEA domain family member 1 (SV40 transcriptional enhancer factor)**

Synonyms: AA; REF1; TCF13; TEF-1; TEAD1

TTCCGAACATTCTTAGCATCGCTCGCGCCGCGCCGCGCCGCTGAGCCGAGCCGAGCCTCTGCTGCCGCCG  
CCGCGCCCCCGCCCGCCCGCGGGCGCCACCAAGCACTTTGCAGACTCGCTTCCACCCTGCGGGCCATT  
CCGCGCGGGGGCCCGGGCCCGGGCGGCGCGTCCAGGCACAGGCCATGCAGTGACGCCCCCCCCACCC  
TCCACCTTTGCCCGGAGCGCGGGCAGCAGCCAGCGCGCCAGCCGGCCCCGGGGCAGGAGCGGTGCTAGGC  
AGGGGTGGGGTGGCCGGGCCAGGGACCGGGAGCCGGGGAGGGAGCCGGGCACCGAGCAGAGGGCGGGGA  
AGCGGCGCCGAAGTTTGCCTCGGACTCGCCGGGCGCTGCGGTGGCTCCCTGGGCCGAGGACTGTTGCTGCC  
GCTGCCGCCCGCCTTCAATTGCACATTCAAGTGGAAAATTTTTCAGGAGTCAGCAGAAAACATTGTGTCCAAA  
AAAGACTGAGTGCAGTTACCACCAAACCCAGGAGGAGACTCTCCCTGGAAAACCTCCCTTCCCTTTCCGGT  
TTATTTTCTTGAAGAGGCTCCAGGCTTCCGGCTTGAAAATCCCACCGCCAAAATTGAGCCCAGCAGCTGGA  
GCGGCAGTGAGAGCCCTGCCGAAAACATGGAAAGGATGAGTGACTCTGCAGATAAGCCAATTGACAATGAT  
GCAGAAGGGGTCTGGAGCCCCGACATCGAGCAAAGCTTTTCAGGAGGCCCTGGCTATCTATCCACCATGTGG  
GAGGAGGAAAATCATCTTATCAGACGAAGGCAAAATGTATGGTAGGAATGAATTGATAGCCAGATACATCA  
AACTCAGGACAGGCAAGACGAGGACCAGAAAACAGGTGTCTAGTCACATTCCAGGTTCTTGCCAGAAGGAAA  
TCTCGTGATTTTCAATCCAAGCTAAAGGATCAGACTGCAAAGGATAAGGCCCTGCAGCACATGGCGGCCAT  
GTCCTCAGCCCAGATCGTCTCGGCCACTGCCATTATAACAAGCTGGGGCTGCCTGGGATTCCACGCCCGA  
CCTTCCCAGGGGCGCCGGGGTTCTGGCCGGGAATGATTCAAACAGGGCAGCCAGGATCCTCACAAGACGTC  
AAGCCTTTTGTGCAGCAGGCCTACCCCATCCAGCCAGCGGTACAGCCCCCATTCCAGGGTTTGGACCTGC  
ATCGGCCCCAGCTCCCTCAGTCCCTGCCTGGCAAAGTTCGCTCCATTGGCACAACCAAGCTTCGCCTGGTGG  
AATTTTCAGCTTTTCTCGAGCAGCAGCGAGACCCAGACTCGTACAACAAACACCTCTTCTGTGCACATTGGG

CATGCCAACCAATTCTTACAGTGACCCATTGCTTGAATCAGTGGACATTCGTCAGATTTATGACAAATTTCC  
TGAAAAGAAAGGTGGCTTAAAGGAACTGTTTGGAAAGGGCCCTCAAATGCCTTCTTCTCGTAAAATTCT  
GGGCTGATTTAAACTGCAATATTTCAAGATGATGCTGGGGCTTTTTATGGTGTAAACCAGTCAGTACGAGAGT  
TCTGAAAATATGACAGTCACCTGTTCCACCAAAGTTTGTCTCTTTGGGAAGCAAGTAGTAGAAAAAGTAGA  
GACGGAGTATGCAAGTTTTGAGAATGGCCGATTTGTATACCGAATAAACCGCTCCCAATGTGTGAATATA  
TGATCAACTTCATCCACAAGCTCAAACACTTACCAGAGAAATATATGATGAACAGTGTTTTTGGAAAACCTT  
ACAATTTTATTGGTGGTAAACAAACAGGGATACACAAGAACTCTACTCTGCATGGCCTGTGTGTTTGAAGT  
TTCAAATAGTGAACACGGAGCACAAATCATATTTACAGGCTTGTAAAGGACTGAACATGGTTATTTATAT  
ATATAGATATCTGTATATACACACACACATATGTGCACACACACACTCTCTCTCCATTATCGAACGACTGA  
CTGTAAACCTCACCACACAGGGTGGTGCCTGGCCCCGAGGTACCCCCGACTTTTCTAAATCTTGTGTTGAG  
TGAAGTCATTTTTTTCATGTGTTTACACTATCATTGTAGCTGTGAAGTTCTGGTACAGTTGTAAGAAAGAGAA  
ATTGAGTTGTTTTCTCTATGTTCTTTCAGATGTCAGGCCACAATTCCTCGGAAAGGTGAACCTGAACAAAC  
CAAGTCTCTCTGTCAGAGCCCTGTTTTCTAATTGTGGTAGAAAATATTGAGACAGAGCATTGGCCATGGGA  
CATTTACAGCCTTTATACAAATGTATTTAGTTCTCTTTTTTCCAACATAAAAATTTCTGTTTTAAGATACAA  
GTAAAATTAATCTTTAAATATAAATGTAAATTAGTACACAAAATAAGAATCTTTAGACTTATCTTTGTAA  
CTAATTAGGGTGGAAAGTTATGAAAGAATGTAATTCATAAATTTTTTTTTAAATGAAACCTTTTTTTTTTCT  
TTTTGAAACCAAATGTTAAACTATAGCCTTAAAGAAATGCTTGGTAGAAGTGTCTAATGAGACAAATTTGT  
ACTTTTATCCTCAAGGTTAAACACTAATCTCCTAATCCATTAAACTCTTGAACAGGTATTACAAAGGAAGAA  
AACTTCACCCCTTATCCTTAAACATATATAGTATATTTAAAAAATATAAAAATTGTATTGTAATAATGTGATG  
ATGGATTATTTAATGAAAAAGAAAAATGGCTCTTTTTGCAATAAGTAGATACATACTGAAAAAATCTAAA  
CTTACAATGTTTATAGTCTTGTGTGTGCAGTTATATTTTATATGGACGACCAAATTTTTTATTAAGATGAG  
TAAATATTTGAACCACTGAATTTAATAACAAAATTTTAAAATTGGCATGAATACGGAATACTGCACTGTG  
AGATGCAAAGTATACAGAATCTGTGGCTGGGAGAAAATTTTATCAAATAGACAAGTAAAAGGCTCATCAGT  
TTTAGCATCTCTGCTCCCCAGAAAATTTGTAAGCATCCTCACCAGCCTGTGGATACATTCTTTATTTCTAGT  
GACCAATATGCATATTAACCTGCTATAACTAGGGCTATATGTGTAGGTATGTGTATACATATACACAAAT  
GCACATATAGAGTTAACACATTTAGTGAACACTTGTTTAGTGTCACTCAGTTTGTAGGTGCTGATATGTA  
CGTATATCTCAATGTGTCTGTAGACTTAGATAACATCCTCTTGAAGCACATCCATTTCTTTAGCGTCTCTCA  
GTAAGTTACAGTACTTGTGTTGACTTAGGTTTAAAGAGGCCAGCTACCTATCTCTGACCTTTTCAAATAGGC  
TCATTTGGGAGATTTCTTTTGGCAGGAGAGATTTCAACTTTCCAATCTAAGTATTCCAGAGCATGCCAGGC  
AGAGTTGGTTTATGATGTCAGGATGTTTTGAGTTATTTCCCTTAAAGTGTCTTACTGGGGAGAGAACAGGGA  
GTGCTCCTCCAGCTTCCCAAAGAAATATGTTTTTGTAAAGTGGTAGGAACATGTGCACACAATAGAACATGA  
AATAAGTTTTTTAACTTGTAAAACATGTCAAGATTTTTTCCACCAAGCTAGAAAATAAAAAACTTAGTTCTA  
CCACATCCAATTAACCTTACACACCCCTTCCCTGTCTCAACACCTGCTTTGACCCTGCTTTTTCTATTATTA  
CATCAGTCAGCATCTTGTGGTCCCTAACATGAGGATGTGGCTGGCTCGTGGGAAACAGCAAAACACTAAGC  
CTGACCTCTCCCAAATTTGGGAAGACCAGAGGAGAAAGTGCAAAACTGTCCCCATTTGGAATGCCATTCTCT  
TCTAGAAACCAGTTGGACAGTGTCTCTGCCCCTTATAAACAGACTACTGTTGGGTCCCTGATTCCAGGC  
TGGCCTGTGAAGGATTGCCCCAGGTGTCCCCTTTCACGGTTGTACATTTACAGTGACTTCTGTTGAACAC  
CCCTCTTAGGGATGTTTTCTTTGCTCTTATTTCTGCATCTTTCTTAAAGGAAGCCCCATCTCTCCCAG  
GACCAGGAGTTTATGACCAGGCGAGCACAAATGGCTAAAAGCCAAGCTGTCTTAGAATTCAGTGGGAGAG  
CTGTCTGGTTTCAATTTTACCCAGGAATGGTACTTTTTCAGTGCAGCCAGGAGGGCTCTTGGGATTTCTTT  
CCAAAGCACAAAATACTGGGACCCAAGAAGAACAGCTAGAGGACAACCTCTGTTGGCACAGAGACGGGGAC  
AGCCCAGTCTGCTGACCTCACAGGGTCAGCTGGGCCCCCTGGTGCTTACCACCTGCATCCTCTTGCTCA  
GAATGCCTTTGCAGTTGAGTTTTCTGGGTTTTCTATGATTGACCTTGAGGTTTACTCCTTGCTCTTACAACA  
TTTTCTAAGGATTTTTAAAAGTTTACTTCTTGTCTTGTCTTCTTAAAGCTTTCTCCAGGACAGATATTTTCC  
CTGTCTTAAACACTGGTCCAGTCATCCAGTGGGCTTCTCTTTGTCTCTCCAGATTAGACCTTTGGGTGA  
GATTGGCATCACAACATCTAATCTGAGTCTGTCTTTTGTCTTCTTAAAGCTTTCTCCAGGACAGATATTTTCC  
TAAAAGCTTTCTAAAGCATACTAAAGAAGCCTTCCAGAGCCCCGTCTTGCTTCTCTCCAGGTGCTCTAT  
CCCCCTCGAGACCTCTGTTGCCAGGCTTGTCTTACGGCCATCTTGTGTTGTCACTGCAGAGTTTGGAGGCC  
AGTTTTCCACAGCCTAAACAGGGAGGAGCTGCAGAATGGGGCTCTGGTCTCTGGGCATTCAATTTCCCTCAT  
AGAGGCTGAGAATAAAAACAAGGACTTATTACACATGTTCTAGAACCCCAGAATGGCCCAAGTTACCTGAG  
ACCAGGGTTTTCTCAACCTTGACACCATTGACATTTTGGACTGGGTAATTCTTTGTTCTGCAGAGCTGTCTT  
TTGCACTGTAGGAGATTTACTAATATCCCTGGCCTTACCCAGTAGTACCCTAGCACCTATTCCCCACCC  
AGCGTGTCTCCAGATATTGTCAAATATCCCATCGGGTGCAAAATGATCCCTGGTCAAGATCTGTTGCCCAA  
GATGTTACAGGTCACAATGACCACATTTGAAATTGTTTTCCCTTTCAATTTACCCTGTGAAAGCATCTCTC  
CTAGAGCCTTGCAAGAGGCAGGTGACATTTGTGTCCATATTTCTTCTGTTTCCAGAACTTCTGTTTACAAC  
AATTTCTCTCTCGCTACAAGTATTTCTTCACTCAGCACTGGGGAAGTTGGGAACAGCTGGTCACCATCATC  
CCTTTAATCAACTCACACCTGTTTTAAAGAGTGTCTGATTTGACCTTATCCCTTAGTTTTACTGGCGTTA

AAAAAAGTCTCAGCAATTTTTCATTATTTTCTCGTGGGTCTCATTATCAAACCTTTACTTATTTTCGGCATATT  
TCCTCTGGGCTTCTTCTAGTTTTCTGCCTTACAAGCAATGCTGTTCTGTAAATTTATTGAAACCTCTGGAAC  
ATTTACCTTTAGAGATGGAGGATGGAAGGATTGGTACCAGAAGAGGGCTAAGATACGTTTTCTGTCTTGA  
GCTGAAAGCACAGTCTACTCTCCTTCGTTTTGTGATGAGAAAGTTGAGGCCAGAGGGGAGGTGACATGTT  
TAGAGTCACCCAGCTGGTTAGTGACAGAAAAAGCGTGAGAGTTGTCTAGGATTCCTGCCACTTTGGTCCCT  
GGCCTCTCCTGGGGGAGGCTGCTGTTCTTAGGTGCTCTAAGCTTAATCCCTCAGAATGTGTGGACAGGTCA  
GCTTAGAAGAGATGGGGAGATTGAGGATCCCCCTGTGCCAGAGCACAGCCTCACCGGATGCTGCTTCCCAC  
ACTGAAGTGTCTGTCCGACCATTGCTATCTGAGGCATCCACAAGCAGGTAGGAAAAGCTGGCGAGCCATTT  
TACTTCTGAGGACAATTCCCCAGCCACAGGCTCTGAGTCAAATTTCTATTTGGTAAGCATCCTAGCAGCA  
AAGTCTGCCTCAGACCAGCCAAAAACAGCCCCATTCCAAGTACTTGGTGTCAAAAGTCCCCGAACGA  
CTTTTAAACCCCAAGTCTTCTTAAGGTTTCAGTACTGTGGTGGCTTTAGCAGTTGTTTTGTGCAACTATAA  
ATTTTAAATCATCTGAGATGACAGTCAATTTTACAACAGGTACATATTAATTTGTATAATTTGTAT  
ATGCTCTGGTACACTACCTGAACTAACGAAGGGTAGAACTAATTCTGTTTGTGAGTGTTCACACCTGTAAC  
ATTAGGAGGATATGTCTGCATTGCTTATTTCTTTATGTTGGTGTCTTCTGTGGCAAAGCCCTGCACATGGCA  
TTTCTGAAAAGCCTTAAATCTTTAAGATGTTGCATGTAGGGTATGCAGTGCAAAAGGCTGCCTCAGAAGT  
TGAGCCCTTTTGTAAAGCTGGAAGCATTCTCTTACTACTGTTACTTTTGTAGGAAGTTTTCAATTCAGAGC  
TGCCAAAGTGTTCGGTAAGCAGTGCCTTAGTAATACCTTAGTCATGCCGCCAGCCTTTTCTTACACCAAT  
TCCTAATGTTTCATTTACGAATTGGCCCAATATTGGAACAAAACAAGCAAAAATTGTCTTCATTTTTGTTT  
TGTAAGCCCATTTTTTCTCCAGTTCTATAGGAACTGACTGCTTGGTGTAAAATCCGAAACTGGACACAAG  
TCAGTTCTTTTACCACACTCAAATGTATATACAAAACAAGGTTGCAACTTCATAGTTTACTATGAAAA  
GCAAAATGTACTTTTTAATGTTGCCTTTTTAAATTCATGACCAAATACTTAGCTATTTGTGAATCTTCTGCA  
CTCTAGCATGAAAGTGCCTTTGGTTTTGAGATTCCAGCTTAGAAAAGTGTGCCATAATAACGATAATTTGT  
AGAGAGACCAAAAATATTTTGTAGATCACCGTAATGCCTTTGGTTTTACCGGGATGAGTAACCAACCACAGGC  
CTCTGTTTACAAGAGCACGACGTGGTCCCCGCCTGCTGCTAGTCTGTCTGCCACTGGGGGCCTCCCAACAT  
CCATAGCACACTTCAGCGGAAGGACCCAGAACTGTTGTGTTTGTGTGTGCTGATGACCTAGTGTGTCAT  
TTCACCTCGTCACCCAGCCCTGCGTCCGGATGAGGGGACTTCTGCACAAATGACAGAATCTCGGCTGGTGG  
ACAGATACTACAGCTTTCTCCTCCTCCTTGTGTTTGTGTTTGTGTTTGTGTTTGTGTTTGTGTTTGTGTTT  
AATGACAGTGCACACTTATCTGGTTTACACAATGATACCATTTTAAAAGTTGGAAGCCTCAAACCTGAGACG  
ACAGTGCAGAAAAACAAAAGTGAAGTGGGTCGTTAAAATTTGAAGTGTCTTCTTAGGGCAAAACATGTT  
GACTCCGAGTATTGTGATGAATGTGCTACGAGAACTTCAAAGAGCACCATTACAATTTGGCATTTTT  
AAAGAATGTTCCAGCCCTCAAAGGGCAACTCTTTAAAAGTCTTGTGGCTTTTATCCAAACCTTGTAGAA  
ATTGGGAAAGCTGATAGAGGTAAGGAAGACGAGTGAAGGACAAGAAGGCCAAACACCAGCCAAAAAGAA  
ACTAGGAAAAAAGATTTTTCTTTGCTAATATAGATGTAAAATAACATCAGACATCTTTGAAAATTAGCCT  
CTAAACTCTTAATACATACGTTCTGTGTGCTCTACCTGGCGTCTTTAAGAATATCCTCTCTGGGCTCTGA  
AATTTTAGGAGTGATTCTTATCCACTCCAAGTTGTAAGTATTTGTAGAAATTTGTGCAAAACAAAACAAAAC  
TATCAAATGAAAAGAAAATGTACTCAACCTAACTTATAGTTAGCAGCTGGAATTCCTCAACTCTTCCCTGCC  
AGCACTATACCACAGTGTGGAAGAAATTAGTCAAATGCTTGTGTTTTCTGCTTCTTTTTCAACTGTTACTG  
TGCTTTGTTTGAAGTAGTTTTCTCTCTCAAAGCCGTTGCTTATATCGTTAAGAATGAAGGTTTGTGTTTA  
AAATTTATTGCATTGCAAAGGGTAGTTTCACTGAAGTCATGCACCATTAAATAAGATGAAATATTTGTATT  
TATTGTCCTACTTCTAAGCCGTAACCTTTTTCTCTGTGAATTTGCATTGAGTCACTCATGCTACACTA  
CATCGCTTTAGTATTTGAGATGGCATTATGTTTCTCTCGTTTATCATGAAATGGGGTCAGATTCCATCA  
GATTCACCTCTGTGAGGTGGACTCTTGTCTGCCTTCCATGATGAGATTTTTTTTTCTCCTTCCCCTTTCTT  
TAAGAGAGGCTGACAGATCTAGGTGTCAATCAATTGGAACCCAGTCTCTGATTTTTTTTTCTATTAGTTATTT  
TCTATCATTAGTTTCACTGTGTAATTAGATATCAACTGCCTTCTTTAAAAAATAACATCTCCCTATT  
ACCTCCTTGAAGATTTACTTCTGTAGGCCTTTTTCAATAGGCTCATGACTGCAGACAAGGAAAAAAG  
TAAAAACAAAACAGTATGTGCCTGAAAATGACAAAAAATTTGTAACATTTAAAAAAGAAACCTGAA  
TAGCCTTTAATTTCTTAATAATACACTTAAATTTTATGTAAATCGGTTTTTCGCCACGTGTGTTTGTTCACA  
TTCTAAATGACTTAATGGGATTTCTCACGGTCTGTGCTTTTGTGTCACGTGTATAAAATGGGCTTGTGATGT  
AAGCGTTTCTCTGGTCAAGTGGTTCTTTGATATTGACTGCTGCTGGGAGTGGGCTGTGGAACCTGCCTT  
CGGGTAACCTGGGTTCTTCTTGGGTAGATTGGAGAGATGGGGGTGGGCGTGGGCAAATTTCTCACACATGTTT  
TCTTAACCTATTTGCAGAACTTTCAAAGGCATTTGATTAAACCTCTTGGCAGTACAGTATTCTTGTATT  
TGTTAACGTCTGTGTTTAGGTACTGGTACCTTTTTGTTTTAAAATGTTCTAAGTGTGGCTTTAAAGTGAA  
TTTATCTTTAGTATGATAGTTATATGAAAATTATAGGATTTGTGTGCAGAGAATTTTTTTATAAAGTGCTT  
TGTAAAAAAATAAATGATTTCTAGCTTTTGGCGTACATATGTGTGATAACTTTAATACCCATGACAGTT  
AAGTGCAATTTTCTCACTCTAAAATGCTATTTTTGTGTGAGTTCCTGCAGGTGTTTTCTATGCTTTG  
CAAAGTGACACATTTTGTATGCCTTCTTGATAAAGTGGTAGACATTTTGTAGCTTTCTAGAACTTTGTATT

CATACGGTATCAATGAAAAATAAAGAAAATGAAAGTGTGGGTACCTTTTTTATCTGCAAAAAAAAAAAAA  
AAAAA

LENPTAKIEPSSWSGSESPAENMERMSDSADKPIDNDAEGVWSPDIEQSFQEALAIYPPCGRRKIILSDEG  
KMYGRNELIARYIKLRTGKTRTRKQVSSHIQVLARRKSRDFHSKLKDQTAKDALKQHMAAMSSAQIVSATA  
IHNKLGLPPIPRPTFPGAPGFWPGMIQTGQPGSSQDVKPFVQAYPIQPAVTAPIPGFEPASAPAPSVPAW  
QGRSIGTTKLRLVEFSAFLEQQRDPDSYNKHLFVHIGHANHSYSDPLLESVDIRQIYDKFPEKKGGLKELF  
GKGPQNAFFLVKFWADLNCNIQDDAGAFYGVTSQYESSENMTVTCSTKVCSFGKQVVEKVETEYARFENGR  
FVYRINRSPMCEYMINFIHKLKHLPEKYMNSVLENFTILLVVTNRDQETLLCMACVFVSNSEHGAQHH  
IYRLVKD

+++++

## #10

### NM\_001098504

Apparently conserved in mammals though in-frame stop codon in mice, rats and elephants. Likely initiated at a “ACGGUG” tandem downstream)

#### DDX17 DEAD (Asp-Glu-Ala-Asp) box polypeptide 17

Synonyms: P72; RH70; DKFZp761H2016; DDX17

GTTAAGTTGGAGCCGACTCAGCGGCCGCCCATTTTTGTGCAGTCGCTGGGAAGGAAGGAGACGCCTAAAC  
CGCGGCACTGCCCGGTTTTGAGCGTAGCCAAACCTGCCACCAGGCTTTGTAGCCCCGATTCTCTGTGTTTTG  
CTCCCGTCTCCGACGAGAGAGGCGGCGACGGTGGCGTCTGCGACGGGAGACAGCGCGTCGGAGCGAGAGAG  
CGCTGCGCCTGCCGCCGCCCAACAGCGGAGGCGCCGCCCATCGGTCTGTACCAGACCGGAGCCGCAGG  
CCCTCCCAGCCCAGCCATCCGTGCCCGCTCCCAGATCTCTATCCTTTTTGGGACCATGCGCGGAGGAGGC  
TTTTGGGGACCGGGACCGGGATCGTGACCGTGGAGGATTTGGAGCAAGAGGTGGTGGTGGCCTTCCCCGAA  
GAAATTTGGTAATCCTGGGGAGCGTTTTGCGTAAAAAAAGTGGGATTTGAGTGAGCTCCCCAAGTTTGAGA  
AAAATTTTTATGTGGAACATCCGGAAGTAGCAAGGCTGACACCATATGAGGTTGATGAGCTACGCCGAAAG  
AAGGAGATTACAGTGAGGGGGGAGATGTTTTGCTTAAACCCGTGTTTGCCTTCCATCATGCTAACTTCCC  
ACAATATGTAATGGATGTGTTGATGGATCAGCACTTACAGAACCAACTCCAATTCAGTGCCAGGGATTTCC  
CGTTGGCTCTTAGTGGCCGGGATATGGTGGGCATTGCTCAGACTGGCTCTGGGAAGACGTTGGCGTATCTC  
CTGCCTGCAATTGTTTCATATTAACCACCAGCCATACTTGAAAGGGGAGATGGCCCAATCTGTCTAGTTCT  
GGCTCCTACCAGAGAGCTTGCCAGCAAGTACAGCAGGTGGCCGATGACTATGGCAAATGTTCTAGATTGA  
AGAGTACTTGTATTTATGGAGGTGCTCCTAAAGGTCCCCAGATTGCGAGACTTGAAAGAGGTGTTGAGATC  
TGCATAGCCACTCCTGGACGTCTGATAGATTTCTGGAGTCAGGAAAGACAAATCTTCGCCGATGTACTTA  
CCTTGTATTGGACGAAGCTGACAGAATGCTTGGATGTTGGGTTTTGAACCCAGATCCGTAAAATTTGTTGACC  
AAATCAGCCCTGATAGGCAGACACTGATGTGGAGTGCAACCTGGCCAAAAGAAGTAAGACAGCTTGCAGAG  
GATTTCCCTTCGTGATTACACCCAGATCAACGTAGGCAATCTGGAGTTGAGTGCCAACCACAACATCCTCCA  
GATAGTGGATGTCTGCATGGAAAGTAAAAAGACCACAAGTTGATCCAATAATGGAAGAAATAATGGCTG  
AAAAGGAAAAACAAAACAATAATTTTTGTGGAGACAAAGAGACGCTGTGATGATCTGACTCGAAGGATGCGC  
AGAGATGGTTGGCCAGCTATGTGTATCCATGGAGACAAGAGTCAACCAGAAAGAGATTGGGTACTTAATGA  
GTTCCGTTCTGGAAAGGCACCCATCCTTATTGCTACAGATGTAGCCTCCCGTGGGCTAGATGTGGAAGATG  
TCAAGTTTGTGATCAACTATGACTATCCAAACAGCTCAGAGGATTATGTGCACCGTATTGGCCGAACAGCC  
CGTAGCACCAACAAGGGTACCGCCTATACCTTCTTCAACCCAGGGAACCTAAAACAGGCCAGAGAGCTTAT  
CAAAGTGCTGGAAGAGGCCAATCAGGCTATCAATCCAAAACCTGATGCAGCTTGTGGACCACAGAGGAGGCG  
GCGGAGGCGGGGTAAGGGTGGTCTGTTCTCGTTACCGGACCACTTCTTACGCCAACAATCCAATCTGATG  
TATCAGGATGAGTGTGACCGAAGGCTTCGAGGAGTCAAGGATGGTGGCCGGAGAGACTCTGCAAGCTATCG  
GGATCGTAGTGAAACCGATAGAGCTGGTTATGCTAATGGCAGTGGCTATGGAAGTCCAAATTCGCCTTTG  
GAGACAAGCAGGCCAATACACCTATGGTCAAGGCACCTATGGGGCAGCTGCTTATGGCACCAGTAGCTAT  
ACAGCTCAAGAATATGGTGTGGCACTTATGGAGCTAGTAGCACCACTCAACTGGGAGAAGTTCACAGAG  
CTCTAGCCAGCAGTTTAGTGGGATAGGCCGGTCTGGGCAGCAGCCACAGCCACTGATGTCACAACAGTTTG  
CACAGCCTCCGGGAGCTACCAATATGATAGGTTACATGGGGCAGACTGCCTACCAATACCCTCCTCCTCCT  
CCCCCTCCTCCTCCTCACGTAATGAACCACTCAAGTGGTAGTGACTCCAGCAGACTTAATTACATTTT

AAGGAACACTGTCTTTTCTTTTTTTTTCTCTTCGCCTTTTCTTTTTTTTTCTTTTTTTCTTTTTTTTTTT  
TTAATTTTTTCCCCCAACCATCGTGATTTGTCTTTTCATGCAGATTAGTTAGAATTCAGTCCAGGTTTCT  
TCTGCCACCAAATGATCCAGTCTGGAATAACATTTTGTAAAAAATAATATATATATATATATATAT  
AGCTGACTGGAAGAGATTAATTTCTTCCCCCAACTTCTTGCATGTTGAAGATATTTGAGCTATTTTTCATC  
TAAAAGAGTAAGGTATTAGGCCCTTTTGTGGGAGCCCATGTTTTGTTTTCTGAGTTGGTGGGGAGGGAG  
GGAGGGGGAGGGCTGAATTGTTTTGCAGAGGAAGATGGCATCTGTGCTTTAAATTTCTCATTACTGGGTTA  
GAAAACAAAGAGGGATTGCCCTGCACATTTTCTTTTGTGCTTTTAAATGTTTCTTAAGTTGGAACAGGTTT  
CCTCGGGCCTGTTTTGACTGATTGCTGGAGTGCATTTGATAGTTAAAAATTACTAATTGGTTTTATTTCCC  
TTCACACTCTGCCTCCCCACTTCTCCCCCGTTACTGAAAAATAACCATTTTAGTGTGAGGCTAGAAAATTG  
AATTGCTGAGTTTTGTGTATCCTTTAAATTAACACACAAGTGTATTATTGTAGTGGTTAAACTGTAGCAT  
CTCAGCATCTGGGTGGAAGCTGCCTATATTTCTTCCAGTTTAACTGGGGACCATCTGTGAAATTAATTTT  
CCTCCAGACAGCTGTGTGAGCAAATGAACATAAATGCTCGCTGGAAATTTACTAACCAGTTTTATATT  
GACCTGCAGTGAAAAAGCACATTTAATTATAAAACAATATATTCAAATGGGCAAATTTATTTTCAAATG  
CAGTGTAGAGCTAGATTAAGCAACTCTTGGCACCTACTCTGCCCTTTTGGCAAAGTTACCTTGAACAA  
AGAATCTTAAGGGTTTATTAAGAACTCTTTATTTTTCTTACATACCCTGTTCTCTGCAGTGTCTTCTAACAGC  
TTCTGGGTGCAGATTTTCTTGGCATCCTTTTGCACCTAGCTTATTACAGGTAGGTAGTGTCTTAAAGAAAAG  
TCATGGAGGACTAAAGCCTAAGTCTTTTCACTTTTCTCCATCTGAAGGTAGGTGAGTTCATCCTCTTCA  
TGGTAATGCTGTTTTACCAAGACTTTATAGCAGATGGACCCAGAAAGAATTTTCTGCTATTGTGTTCACTA  
CAACAGGATAGGGACATCAGACAGCCCCAGAAACCCCTTCCAGATCTGATATGGGACTATTAATTTTTATG  
CTGTTAATTGGTATTCAATCACAATGCAGTTGAAGGGGAAGGCTCCACTGCATTCTTTGGCTAAGGCCTG  
AATGCTTGTCTCATCTGTAAGATCTATACTCGAGTTTTGTTTTCTTTTAAATTTCTTTAGGGAGAGAGGG  
ATGTTTTCTGAGGGGTTCTGAAAGTATGATTCAATGTGCAACATACAGGTAGGTCTTTCAGCATAAGCTGAA  
ATATATGCATGTA AAAACTTTGACATCTTTTTTTTTTAATTTTCACTTTCTTCTTAACCTTTACTTCTCTTT  
TTGTCCCCCCCCCATCTTACAGAAGTTGAGGCCAAGGGAGAATGGTAGGCACAGAAGAAACATGGCAAAC  
GCTCTGTGCTTTCAAACCAAAGTGTCCCCCAACCCCAAATTTGTCTAAGCACTGGCCAGTCTGTTGTGG  
GCATTGTTTTCTACAACCAAATTTCTGGGTTTTTTTTCTTCTTTCTTTAAACATAGAGGTACCACCACAAGGG  
ATGCCCTACTCTCTCGCAGCTCTTGAAGCATCTGTTTGAAGGAAAGGTCTCTGGGCAAGCAAGTGGTTAT  
TTGGATTGCTTGTCTTCCCTTTTTCCACCTGGGACATTGTAATCATAAAATAACAGTAAATTTCAAACCTCA  
AAAATATTATGGCTGAGCACAGCTGAAATCTAGCAGAGTTTAACTCTTCTGCCTCCATGTCTGTCACTT  
ATAATTGAGTTCTGCTGTTGGCTTTCAGAACATGAGCAGAAGAATCGTTTTATGCTAGTTATTGCTATT  
GGTTGAAACTCAACTTAGGGAAAGGGTTCCAATGTATTAAGCAATGGGCTGCTTCTCCCAATCCTCCCTA  
ACAATTCGTTGTGTGGACTTCTCATCTAAAAGGTTAGTGGCTTTTTGCTTGGGATCAGTGTCTCTATTGAT  
GTTCTTGGTGTCTCCAGACACATTCCTGTTGCATTAAGACTTGAAAGACTTGTAGATGTGTGATGTTTCCAG  
GCACAGGATGCTGAAAGCTATGTTACTATTCTTAGTTTGTAAATTGCTCTTTTGTATACCATCATCTTGT  
TCTTTTTGTAGGTATAAATAAAAAACTGTTGACAATAAAAAAAAAAAAAAAAAA

TVASATGDSASERESAAPAAAPTAEAPPPSVVTRPEPQALPSPAIRAPLPDLYPFGTMRGGGFGRDRDRD  
RGGFGARGGGGLPKKFGNPGERLRKKKWDLSELPKFEKNFYVEHPEVARLTPYEVDLRRKKEITVRGGD  
VCPKPVFAFHANFPQYVMDVLMQHFTEPTPIQCQGFPLALSGRDMVGIQGTSGKTLAYLLPAIVHINH  
QPYLERGDGPICLVLAPTRELAQQVQVADDYKKSRLKSTCIYGGAPKGPQIRDLEGRVEICATPGRLI  
DFLESKTNLRCTYLVLDEADRMLDMGFEPQIRKIVDQIRPDRQTLMWSATWPKEVRQLAEDFLRDYTI  
NVGNLELSANHNILQIVDVCMESEKDHKLIQLMEEIMAEKENKTIIFVETKRRCDLRRMRRDGPAMCI  
HGDKSQPERDWLNEFRSGKAPILIAITDVASRGLDVEDVKFVINYDYPNSSEYVHRIGRTARSTNKG  
TAYTFFTPGNLQKQARELIKVLEEANQAINPKMLQLVDHRGGGGGGGKGRSRYRTTSSANNPNLMYQ  
DECRRLRGVKDGRRRDSASYRDRSETDRAGYANGSGYSPNSAFGAQAGQYTYGQTYGAAAYGTSSY  
TAQYEGAGTYGASSTTSTGRSSQSSSQFSGIGRSGQQPQPLMSQQFAQPPGATNMIGYMGQTAYQY  
PPPPPPPPSRK

+++++

# #11

## NM\_001025366

Region is conserved in mammals. In-frame stop codons and broken frames in: *Callithrix jacchus*, *Felis catus*, and *Echinops telfairi*.

**VEGFA vascular endothelial growth factor A**

Synonyms: VPF; VEGF; MVCD1; MGC70609; VEGFA

GGCTTGGGGCAGCCGGGTAGCTCGGAGGTCGTGGCGCTGGGGGCTAGCACCAGCGCTCTGTCTGGGAGGCGC  
AGCGGTTAGGTGGACCGGTGAGCGGACTCACCAGCCAGGGCGCTCGGTGCTGGAATTTGATATTCATTGAT  
CCGGGTTTTATCCCTCTTCTTTTTTCTTAAACATTTTTTTTTTAAAAGTATTGTTTCTCGTTTTAATTTA  
TTTTTGCTTGCCATTCCCCTTGAATCGGGCCGACGGCTTGGGGAGATTGCTCTACTTCCCCAAATCACT  
GTGGATTTTGGAAACCAGCAGAAAGAGGAAAGAGGTAGCAAGAGCTCCAGAGAGAAGTTCGAGGAAGAGAGA  
GACGGGGTTCAGAGAGAGCGCGGGCGTGCAGCAGCGAAAGCGACAGGGGCAAAGTGAAGTGCCTGCTTT  
TGGGGGTGACCGCCGGAGCGGGCGTGCAGCCCTCCCCCTGGGATCCCGCAGCTGACCAGTCCGCTGACG  
GACAGACAGACAGACACCGCCCCAGCCCCAGCTACCACCTCCTCCCCGGCCGGCGGGCAGAGTGGACGC  
GGCGGCGAGCCCGGGCAGGGGCCGGAGCCCGCGCCCGAGGGCGGGGTGGAGGGGGTTCGGGGCTCGCGGCG  
TCGCACTGAAACTTTTTCGTCCAATTTCTGGGCTGTTCTCGCTTCGGAGGAGCCGTGGTCCGCGCGGGGGAA  
GCCGAGCCGAGCGGAGCCGCGAGAAGTGCTAGCTCGGGCCGGGAGGAGCCGAGCCGGAGGAGGGGGAGGA  
GGAAGAAGAGAAGGAAGAGGAGAGGGGGCCGAGTGGCGACTCGGCGCTCGGAAGCCGGGCTCATCGACGG  
GTGAGGCGGGCGGTGTGCGCAGACAGTGTCCAGCCGCGCGCGCTCCCCAGGCCCTGGCCCGGGCTCGGGC  
CGGGGAGGAAGAGTAGCTCGCCGAGGCGCCGAGGAGAGCGGGCCGCCCCACAGCCCGAGCCGGAGAGGGAG  
CGCGAGCCGCGCCGGCCCGGTTCGGGCTCCGAAACCATGAACTTTCTGCTGTCTTGGGTGCATTGGAGCC  
TTGCCTTGCTGCTCTACCTCCACCATGCCAAGTGGTCCCAGGCTGCACCCATGGCAGAAGGAGGAGGGCAG  
AATCATCAGAAGTGGTGAAGTTTATGGATGTCTATCAGCGCAGCTACTGCCATCCAATCGAGACCCCTGGT  
GGACATCTTCCAGGAGTACCCTGATGAGATCGAGTACATCTTCAAGCCATCCTGTGTGCCCTGATGCGAT  
GCGGGGGCTGCTGCAATGACGAGGGCCTGGAGTGTGTGCCACTGAGGAGTCCAACATCACCATGCAGATT  
ATGCGGATCAAACCTCACCAAGGCCAGCACATAGGAGAGATGAGCTTCTACAGCACAAACAAATGTGAATG  
CAGACCAAAGAAAGATAGAGCAAGACAAGAAAAAAATCAGTTCGAGGAAAGGGAAAGGGGCAAAAACGAA  
AGCGCAAGAAATCCCGGTATAAGTCTTGGAGCGTGTACGTTGGTGCCTCGCTGTCTAATGCCCTGGAGC  
CTCCCTGGCCCCCATCCCTGTGGGCCTTGCTCAGAGCGGAGAAAGCATTGTTTGTACAAGATCCGCAGAC  
GTGTAATGTTCTGCAAAAACACAGACTCGCGTTGCAAGGCGAGGCAGCTTGAGTTAAACGAACGTACTT  
GCAGATGTGACAAGCCGAGGCGGTGAGCCGGCAGGAGGAAGGAGCCTCCCTCAGGGTTTCGGGAACCAGA  
TCTCTCACCAGGAAAGACTGATACAGAACGATCGATACAGAAACCACGCTGCCGCCACCACACCATCACCA  
TCGACAGAACAGTCTTAATCCAGAAACCTGAAATGAAGGAAGAGGAGACTCTGCGCAGAGCACTTTGGGT  
CCGGAGGGCGAGACTCCGGCGGAAGCATTCCCGGGCGGGTGACCCAGCACGGTCCCTCTTGAATTGGATT  
CGCCATTTTTATTTTTCTTGCTGCTAAATCACCGAGCCCGGAAGATTAGAGAGTTTTATTTCTGGGATTCCT  
GTAGACACACCCACCCACATACATATATATATATATATATATATATAAAAATAAATATCTCT  
ATTTTATATATATAAATATATATATATCTTTTTTTTTAAATTAACAGTGCTAATGTTATTGGTGTCTTCACTG  
GATGTATTTGACTGCTGTGGACTTGAGTTGGGAGGGGAATGTTCCCACTCAGATCCTGACAGGGAAGAGGA  
GGAGATGAGAGACTCTGGCATGATCTTTTTTTGTCCCCTTGGTGGGGCCAGGGTCTCTCCCCTGCCCA  
GGAATGTGCAAGGCCAGGGCATGGGGGCAAAATATGACCCAGTTTTGGGAACACCGCAAAACCAGCCCTGG  
CGCTGAGCCTCTACCCAGGTGAGCAGGACAGAAAGACAGATCACAGGTACAGGATGAGGACACCCGGC  
TCTGACCAGGAGTTTGGGGAGCTTCAGGACATTGCTGTGCTTTGGGGATTCCCTCCACATGCTGCACGCGC  
ATCTCGCCCCAGGGGCACTGCCTGGAAGATTGAGGAGCCTGGGCGGCCTTCGCTTACTCTCACCTGCTTC  
TGAGTTGCCAGGAGACCCTGGCAGATGTCCCGGCGAAGAGAAGAGACACATTGTTGGAAGAAGCAGCCC  
ATGACAGCTCCCTTCTGGGACTCGCCCTCATCTCTTCTGCTCCCTTCTGGGGTGCAGCCTAAAAG  
GACCTATGCTCTCACACCATTGAAACCACTAGTTCTGTCCCCCAGGAGACCTGGTTGTGTGTGTGAGT  
GGTTGACCTTCCCTCCATCCCTGGTCTTCCCTTCCCTTCCCGAGGCACAGAGAGACAGGGCAGGATCCAC  
GTGCCATTGTGGAGGCAGAGAAAAGAGAAAGTGTATATACGGTACTTATTTAATATCCCTTTTTAAT  
TAGAAATTAACAGTTAATTTAATTAAGAGTAGGGTTTTTTTTTTCAGTATTCTTGGTTAATATTTAATTT  
CAACTATTTATGAGATGTATCTTTTGCTCTCTCTTGTCTCTTATTTGTACCGTTTTTTGTATATAAAATT  
CATGTTTCCAATCTCTCTCCCTGATCGGTGACAGTCACTAGCTTATCTTGAACAGATATTTAATTTTGC  
TAACACTCAGCTCTGCCCTCCCCGATCCCCTGGCTCCCAGCACACATTCCTTTGAAATAAGGTTTTCAATA  
TACATCTACATACTATATATATATTTGGCAACTTGTATTTGTGTGTATATATATATATATATATATATGTTTATGTA  
TATATGTGATTCTGATAAAATAGACATTGCTATTCTGTTTTTATATGTAAAAACAAAACAAGAAAAATA  
GAGAATTCTACATACTAAATCTCTCTCCTTTTTTAATTTAATATTTGTTATCATTTATTTATTTGGTGTCTA  
CTGTTTATCCGTAATAATTGTGGGAAAAGATATTAACATCACGTCTTTGTCTCTAGTGCAGTTTTTCGAG  
ATATCCGTAGTACATATTTATTTTTAAACAACGACAAAGAAATACAGATATATCTTAAAAAATAAAGC  
ATTTTGTATTAAGAATTTAATTTCTGATCTCAAAAAAAAAAAAA

LTDRQTDTPSPSYHLLPGRRRRTVDAAASRGQPEPAPGGGVEGVGARGVALKLFVQLLGCSRFGGAVVRA  
GAEAPSGAARSASSGREEPQPEEGEEEEKEEERGPQWRLGARKPGSWTGEAAVCADSAPAARAPQALARA  
SGRGGRVARRGAEESGPPHSPSRRGSASRAGPGRASET MNFLLSWVHWSLALLLYLHHAKWSQAAPMAEGG  
GQNHHEVVKFMDVYQRSYCHPIETLVDIFQEYPDEIEYIFKPSCVPLMRCGGCCNDEGLECVPTTESNITM  
QIMRIKPHQGQHIGEMSFLQHNKCECRPKKDRARQEKKSVRGKGGQKRKRKKSRYKSWSVYVGARCCCLMP  
WSLPGPHPCGPCSERRKHLFVQDPQTCKCSCKNTDSRCKARQLELNERTCRCDKPRR

+++++

## #11

### NM\_022002

Region conserved from insects to human. Non-AUG initiation conserved in mammals; in non-mammals the region is initiated by AUG.

#### NR1I2 nuclear receptor subfamily 1, group I, member 2

Synonyms: BXR; PAR; PRR; PXR; SAR; SXR; ONR1; PAR1; PAR2; PARq; NR1I2

TTCTTAACCCTTTCCAGCTTTCCACCCTCTTTGGCTTTAGCCATGGCCTTCTGATCTGTGTTTCTCAGGG  
GACCTGCAGGCCCCAGATATAGCCCCATGCTGTCTCCTACCCAGAGCACACTGTTTCAGGCTACTTCCAC  
TGGTACTGAAATCCAGTATTTCACTTACTCTTTTTCTTTCCAATATCCTCATGACATTCAATATTTCACTT  
ACTCTAGGTCTCCTGCCTAAGGCCCAAGTCAACTTTCTGTCCAGTGGGATTTGTAATCCAATACCTCCT  
AGCCCTAGCAGAATCCCATGTGGATAATCAGAAATGTGACTGGAAAAAGGACAGAGCTCTATGGCTGTGGG  
TCCCAGTCCCCTGCTGGCAGTAAGTCCCAGCAGTGTGTAAGCACCTTACATTCTGCGCTTGGT  
TGAAAACAGCAAGGCAAGCATCCACTTGAGAAATGTCAACCCTAGGAAATCCCAGCCTCAAGTCTTTCTC  
ATCCCTTGGGAAGTGCAAATTGGATAGAGAAGAAACCAATTAATAAAACAAAACAAACAAATCATACTTAGAT  
ATTCTGGCTTTTCTCACCAGGGCTGGATTAAGCATGTACTTCAAATAATAACAACCTTAAGTCAATAAAT  
AAATGTAAGGAAGTCAAATGTTACCTGAAGACAACCTGTGGTCATTTTTTGGCAATCCCAGGTTCTCTTT  
TCTACCTGTTTGTCTCAATCGTGGTCTCCCTCTCCCTCTCTTGTGGGGCCCATGCCCTGCTTTACTGTTG  
CCAGAGGCTTGTACTTGTGGCTTTTAGGTAGGAGCAGTTACTTCCACTCCCCTCACCTGCCATAAAGCA  
TCTTTATAAAACAAAGCAAGTAGAAGAAACACATCCTGGTATCCACCACATTCGGCTTTTGTGATTCTGTT  
CACTTGGGAGCACCTGCTGCTAGGGAATAAGAAGGTTGAGGCTGAAGAGTGAGGACTCTTCAGCTCCCCTC  
TGGCAGGACCCGGGAGAGGAAAGAGCCCTCAGCTGGTCCATCCTCCCCTCCTGGTCAGCCTTCTGTTCT  
GAGATCAAAGTGGTGGGTACATTCTCGAGAATGTGCTCAGCCCCCTCATCTCACACTTTCCCTCTC  
CCTGTGTCCCTGCCCTTTACATAACCATGCTGGTGATTGGCACCGTCAATAATCAATACTTCTCA  
CTTTCACATCAAGTAACACTATCCAGGGAGGTGGTTTTCAACAAAGGAGGAAGTATAAGGAGATCTAGGTTT  
AAATTAATGTTGCCCTAGTGGTAAAGGACAGAGACCCTCAGACTGATGAAATGCACTCAGAATTACTTAG  
ACAAAGCGGATATTTGCCACTCTCTTCCCCTTTTCTGTGTTTTTGTAGTGAAGAGACCTGAAAGAAAAA  
GTAGGGAGAACATAATGAGAACAAATACGGTAATCTCTTCAATTTGCTAGTTCAAGTGCTGGACTTGGGACT  
TAGGAGGGGCAATGGAGCCGCTTAGTGCCTACATCTGACTTGGACTGAAATATAGGTGAGAGACAAGATTG  
TCTCATATCCGGGAAATCATAACCTATGACTAGGACGGGAAGAGGAAGCACTGCCTTTACTTCAGTGGGA  
ATCTCGGCCCTCAGCCTGCAAGCCAAGTGTTCACAGTGAGAAAAGCAAGAGAATAAGCTAATACTCCTGTCC  
TGAACAAGGCAGCGGCTCCTTGGTAAAGCTACTCTTGAATCGATCCTTTGCACCGGATTGTTCAAAGTGGA  
CCCCAGGGGAGAAGTCGGAGCAAAGAATTACCACCAAGCAGTCCAAGAGGCCAGAAGCAAACCTGGAGG  
TGAGACCCAAAGAAAGCTGGAACCATGCTGACTTTGTACTGTTGAGGACACAGAGTCTGTTTCTGGAAAG  
CCCAGTGTCAACGCAGATGAGGAAGTCGGAGGTCCCCAAATCTGCCGTGTATGTTGGGGACAAGGCCACTGG  
CTATCACTTCAATGTCAATGACATGTGAAGGATGCAAGGGCTTTTTTTCAGGAGGGCCATGAAACGCAACGCC  
GGCTGAGGTGCCCTTCCGGAAGGGCGCCTGCGAGATCACCCGGAAGACCCGGCGACAGTGCCAGGCCTGC  
CGCCTGCGCAAGTGCCTGGAGAGCGGCATGAAGAAGGAGATGATCATGTCCGACGAGGCCGTGGAGGAGAG  
GCGGGCCTTGTCAAGCGGAAGAAAAGTGAACGGACAGGGACTCAGCCACTGGGAGTGCAGGGGCTGACAG  
AGGAGCAGCGGATGATGATCAGGGAGCTGATGGACGCTCAGATGAAAACCTTTGACACTACCTTCTCCCAT  
TTCAAGAATTTCCGGCTGCCAGGGGTGCTTAGCAGTGGCTGCGAGTTGCCAGAGTCTCTGCAGGCCCCATC  
GAGGGAAGAAGTGCCTGCAAGTGGAGCCAGGTCCGGAAGATCTGTGCTCTTTGAAGGTCTCTCTGCAGCTGC  
GGGGGAGGATGGCAGTGTCTGGAACACAAACCCAGCTGCAGAGTGGCGGGAAGAGATCTTCTCCCTG  
CTGCCCCACATGGCTGACATGTCAACCTACATGTTCAAAGGCATCATCAGCTTTGCCAAAGTCATCTCCTA

CTTCAGGGACTTGCCCATCGAGGACCAGATCTCCCTGCTGAAGGGGGCCGCTTTTCGAGCTGTGTCAACTGA  
GATTCAACACAGTGTTCACCGCGGAGACTGGAACCTGGGAGTGTGGCCGGCTGTCTACTGCTTGGGAAGAC  
ACTGCAGGTGGCTTCCAGCAACTTCTACTGGAGCCCATGCTGAAATTCCACTACATGCTGAAGAAGCTGCA  
GCTGCATGAGGAGGAGTATGTGCTGATGCAGGCCATCTCCCTCTTCTCCCCAGACCGCCAGGTGTGCTGC  
AGCACC CGTGGTGGACCAGCTGCAGGAGCAATTGCGCATTACTCTGAAGTCCTACATTGAATGCAATCGG  
CCCCAGCCTGCTCATAGGTTCTTGTTCCTGAAGATCATGGCTATGCTCACCGAGCTCCGCAGCATCAATGC  
TCAGCACACCCAGCGGCTGCTGCGCATCCAGGACATACACCCCTTTGCTACGCCCCCTCATGCAGGAGTTGT  
TCGGCATCACAGGTAGCTGAGCGGCTGCCCTTGGGTGACACCTCCGAGAGGCAGCCAGACCCAGAGCCCTC  
TGAGCCGCCACTCCCGGGCCAAGACAGATGGACACTGCCAAGAGCCGACAATGCCCTGCTGGCCTGTCTCC  
CTAGGGAATTCTGCTATGACAGCTGGCTAGCATTCTCAGGAAGGACATGGGTGCCCCCCACCCCAAGTT  
CAGTCTGTAGGGAGTGAAGCCACAGACTTTACGTGGAGAGTGCCTGACTGACCTGTAGGTGAGGACCATGAG  
GAGGCAAGGTTGCCCTTTCTTTTAAAAGGCCCTGTGGTCTGGGGAGAAATCCCTCAGATCCCACATAAAGT  
GTCAAGGTGTGGAAGGGACCAAGCGACCAAGGATGGGCCATCTGGGGTCTATGCCACATACCCACGTTTG  
TTCGTTCTGAGTCTTTTTCATTGCTACCTCTAATAGTCTGTCTCCCACTTCCCACTCGTTCCCTCCTC  
TTCCGAGCTGCTTTGTGGGCTCCAGGCCTGTACTCATCGGCAGGCGCATGAGTATCTGTGGGAGTCTCTA  
GAGAGATGAGAAGCCAGGAGGCCTGCACCAAATGTCAGAAGCTTGGCATGACCTCATTCCGGCCACATCAT  
TCTGTGTCTCTGCATCCATTTGAACACATTATTAAGCACCGATAATAGGTAGCCTGCTGTGGGGTATAACAG  
CATTGACTCAGATATAGATCCTGAGCTCACAGAGTTTATAGTTAAAAAACAACAGAAACACAAACAATT  
TGGATCAAAAGGAGAAATGATAAGTGACAAAAGCAGCACAAAGGAATTTCCCTGTGTGGATGCTGAGCTGTG  
ATGGCGGGCACTGGGTACCCAAGTGAAGGTTCCCGAGGACATGAGTCTGTAGGAGCAAGGGCACAACTGC  
AGCTGTGAGTGCCTGTGTGTGATTTGGTGTAGGTAGGTCTGTTTGCCACTTGATGGGGCCTGGGTTTGTTC  
CTGGGGCTGGAATGCTGGGTATGCTCTGTGACAAGGCTACGCTGACAATCAGTTAAACACACCCGAGAAGA  
ACCATTTACATGCACCTTATATTTCTGTGTACACATCTATTCTCAAAGCTAAAGGGTATGAAAGTGCCTGC  
CTTGTATATAGCCACTTGTGAGTAAAAATTTTTTGCATTTTACAAATTATACTTTATATAAGGCATTCC  
ACACCTAAGAAGTGTGTTGGGAAATGTAGCCCTGGGTTTAAATGTCAAATCAAGGCAAAAGGAATTAATA  
ATGTACTTTTGGCTAAAAAAAAAAAAAAAAAAAAAAAAAAAAAAAAAAAA

LEVRPKESWNHADVFHCEDESVPKGPSVNADEEVGGPQICRVCGDKATGYHFNVMTCEGCKGFFRRAMKR  
NARLRCPFRKGACEITRKRTRQCQACRLRKCLESGMKKEMIMSDEAVEERRALIKRKKSERGTQPLGVQG  
LTEEQRMMIRELMDAQMKTDFDTTFSHFKNFRLPGVLSGCELPELQAPSREEAAKWSQVRKDLCSLKVSL  
QLRGEDGSVWNYKPPADSGGKEIFSLPHMADMSTYMFKGIISFAKVISYFRDLPIEDQISLLKGAAFELC  
QLRFNTVFNAETGTWECGRLSYCLEDTAGGFQQLLLEPMLKFHYMLKQLHEEEYVLMQAI SLFSPDRPG  
VLQHRVVDLQEQFAITLKSYLECNRPQPAHRFLFLKIMAMLTELRINAQHTQRLRLRIQDIHPFATPLMQ  
ELFGITGS

+++++

# #11

## NM\_001172131

Region conserved in mammals.

**HCK hemopoietic cell kinase**

Synonyms: JTK9; HCK

GTCCCAGCTCGGGAGCACATCAGAGGCTTAGAGGCGAGTGGGAAGGGACTCAGACAGTGCAGGACGAGAAA  
CGCCCCGCGGCACCAAAGCCCTCAGAGCGTCGCCCCCGCCTCTAGTTCTAGAAAGTCAGTTTCCCGGCCT  
GGCACCCCGGAACCTCAGGGGCTGCCGAGCTGGGGGGCGCTCAAGCTGCGAGGATCCGGGCTGCCCGCGA  
GACGAGGAGCGGGCGCCAGGATGGGGTGCATGAAGTCCAAGTTCCTCCAGGTCCGAGGCAATACATTCTC  
AAAACTGAAACCAGCGCCAGCCACACTGTCTGTGTACGTGCCGGATCCACATCCACCATCAAGCCGG  
GGCCTAATAGCCACAACAGCAACACACCAGGAATCAGGGAGGCAGGCTCTGAGGACATCATCGTGGTTGCC  
CTGTATGATTACGAGGCCATTACCACGAAGACCTCAGCTTCCAGAAGGGGGACCAGATGGTGGTCTAGA  
GAACTCGGGGAGTGGTGAAGGCTCGATCCCTGCCACCCCGGAAGGAGGGCTACATCCCAAGCAACTATG  
TCGCCCCGCTTGAATCTCTGGAGACAGAGGAGTGGTTTTTCAAGGGCATCAGCCGGAAGGACGCAGCGC  
CAACTGCTGGCTCCCGGCAACATGCTGGGCTCCTTCATGATCCGGGATAGCGAGACCACTAAAGGAAGCTA

CTCTTTGTCCGTGCGAGACTACGACCCTCGGCAGGGAGATACCGTGAAACATTACAAGATCCGGACCCTGG  
ACAACGGGGGCTTCTACATATCCCCCGAAGCACCTTCAGCACTCTGCAGGAGCTGGTGGACCACTACAAG  
AAGGGGAACGACGGGCTCTGCCAGAACTGTCCGGTGCCTGCATGTCTTCCAAGCCCCAGAAGCCTTGGGA  
GAAAGATGCCTGGGAGATCCCTCGGGAATCCCTCAAGCTGGAGAAGAACTTGGAGCTGGGCAGTTTGGGG  
AAGTCTGGATGGCCACCTACAACAAGCACACCAAGGTGGCAGTGAAGACGATGAAGCCAGGGAGCATGTCC  
GTGGAGGCCTTCTGGCAGAGGCCAACGTGATGAAAACCTCTGCAGCATGACAAGCTGGTCAAACCTTCATGC  
GGTGGTCACCAAGGAGCCCATCTACATCATCACGGAGTTCATGGCCAAAGGAAGCTTGTGGACTTTCTGA  
AAAGTGATGAGGGCAGCAAGCAGCCATTGCCAAAACCTCATTGACTTCTCAGCCCAGATTGCAGAAGGCATG  
GCCTTCATCGAGCAGAGGAACTACATCCACCGAGACCTCCGAGCTGCCAACATCTTGGTCTCTGCATCCCT  
GGTGTGTAAGATTGCTGACTTTGGCCTGGCCCGGTTCATTGAGGACAACGAGTACACGGCTCGGGAAGGGG  
CCAAGTTCGCCATCAAGTGGACAGCTCCTGAAGCCATCAACTTTGGCTCCTTACCATCAAGTCAGACGTC  
TGGTCTTTGGTATCCTGTGATGGAGATCGTCACTACCGCCGATCCCTTACCAGGGATGTCAAACCC  
TGAAGTGATCCGAGCTCTGGAGCGTGGATAACCGGATGCCTCGCCAGAGAAGTCCCAGAGGAGCTCTACA  
ACATCATGATGCGCTGCTGGAAAAACCGTCCGGAGGAGCGGCCGACCTTCCAATACATCCAGAGTGTGCTG  
GATGACTTCTACACGGCCACAGAGAGCCAGTACCAACAGCAGCCATGATAGGGAGGACCAGGGCAGGGCCA  
GGGGGTGCCAGGTGGTGGCTGCAAGGTGGCTCCAGCACCATCCGCCAGGGCCACACCCCCCTTCTACTC  
CCAGACACCCACCCTCGCTTCCAGCCACAGTTTCTCATCTGTCCAGTGGGTAGGTTGGACTGGAAAATCTC  
TTTTTGACTCTTGCAATCCACAATCTGACATTCTCAGGAAGCCCCAAGTTGATATTTCTATTTCTGGAA  
TGGTTGGATTTTAGTTACAGCTGTGATTTGGAAGGGAAACTTTCAAATAGTGAATGAATATTTAAATAA  
AAGATATAAATGCCAAAGTCTTTACCAAAAAAAAAAAAAAAAAAAAAA

LGGRSSCEDPGCPRDEERAPRMGCMKSKFLQVGGNTFSKTETSASPHCPVYVPDPTSTIKPGPNSHNSNTP  
GIREAGSEDIIVVALYDYEAIIHEDLSFQKGDQMVVLEESGEWWKARSLATRKEGYIPSNYVARVDSLETE  
EWWFKGISRKDAERQLLAPGNMLGSFMIRDSETTKGSYLSVRDYDPRQGDTVKHYKIRTLDNNGFFYISPR  
STFSTLQELVDHYKKGNDGLCQKLSVPCMSKPKQKPEKDAWEIPRESLKEKKGAGQFGEVWMATYNKH  
TKVAVKTMKPGSMSVEAFLAEANVMKTLQHDKLVKLHAVVTKEPIYIITEFMAKGSLLDFLKSDEGSKQPL  
PKLIDFSAQIAEGMAFIEQRNYIHRDLRAANILVSASLVCKIADFGGLARVIEDNEYTAREGAKFPIKWTAP  
EAINFGSFTIKSDVWSFGILLMEIVTYGRIPYPGMSNPEVIRALERGYRMPRPENCPEELYNIMMRCWKNR  
PEERPTFEYIQSVLDDFYTATESQYQQQP

+++++

## #14

### NM\_000378

Region conserved in mammals. Broken frame in some: elephants, *Myotis lucifugus*, etc.)  
The CUG site designated as initiation site in humans (shown underlined below) is not  
conserved at all but a CTG close by in much better context is.

#### WT1 Wilms tumor 1

Synonyms: GUD; AWT1; WAGR; WT33; WIT-2; WT1

CCAGGCAGCTGGGGTAAGGAGTTCAAGGCAGCGCCACACCCGGGGGCTCTCCGCAACCCGACCGCCTGTC  
CGCTCCCCACTTCCCGCCCTCCCTCCCACCTACTCATTACCCACCCACCCACCCAGAGCCGGGACGGCA  
GCCAGGCGCCCGGGCCCGCCGTCTCCTCGCCGCGATCCTGACTTCTCTTGCTGAGACCCGGCTTC  
CACGTGTGTCCCGGAGCCGGCGTCTCAGCACACGCTCCGCTCCGGGCCTGGGTGCCTACAGCAGCCAGAGC  
AGCAGGGAGTCCGGGACCCGGGCGGCATCTGGGCCAAGTTAGGCGCCGCGAGGCCAGCGCTGAACGTCTC  
CAGGCGCGGAGGAGCGCGGGCGTCCGGTCTGAGCCGAGCAAATGGGCTCCGAGCTGCGGGACCTGAA  
CGCGCTGCTGCCCCGCCCTCCCTCCCTGGGTGGCGGCGCGGCTGTGCCCTGCCTGTGAGCGGCGCGCGC  
AGTGGGCGCCGGTGTGACTTTGCGCCCCGGGCGCTTCGGCTTACGGGTGCTTGGGCGGCCCCGCGCG  
CCACCGGCTCCGCCGCCACCCCGCCGCCCGCCTCACTCCTTCAACAACAGGAGCCGAGCTGGGGCGG  
CGCGGAGCCGCACGAGGAGCAGTGCCTGAGCGCCTTCACTGTCCACTTTTCCGGCCAGTTCACTGGCACAG  
CCGGAGCCTGTGCTACGGGCCCTTCGGTCTCCTCCGCCAGCCAGGCGTCATCCGGCCAGGCCAGGATG  
TTTCTAACGCGCCCTACCTGCCAGCTGCCTCGAGAGCCAGCCCGCTATTGCAATCAGGGTTACAGCAC

GGTCACCTTCGACGGGACGCCCAGCTACGGTCACACGCCCTCGCACCATGCGGGCGCAGTTCCCCAACCCT  
CATTCAAGCATGAGGATCCCATGGGCCAGCAGGGCTCGTGGGTGAGCAGCAGTACTCGGTGCCGCCCCCG  
GTCTATGGCTGCCACACCCCCACCGACAGCTGCACCGGCAGCCAGGCTTTGCTGCTGAGGACGCCCTACAG  
CAGTGACAATTTATACCAAATGACATCCCAGCTTGAATGCATGACCTGGAATCAGATGAACTTAGGAGCCA  
CCTTAAAGGGCCACAGCACAGGGTACGAGAGCGATAACCACACAACGCCCATCCTCTGCGGAGCCCAATAC  
AGAATACACACGCACGGTGTCTTCAGAGGCATTGAGGATGTGCGACGTGTGCCTGGAGTAGCCCCGACTCT  
TGTACGGTCGGCATCTGAGACCAGTGAGAAACGCCCTTCATGTGTGCTTACCCAGGCTGCAATAAGAGAT  
ATTTTAAGCTGTCCCCTTACAGATGCACAGCAGGAAGCACACTGGTGAGAAACCATAACCAGTGTGACTTC  
AAGGACTGTGAACGAAGGTTTTCTCGTTTCAGACCAGCTCAAAAGACACCAAAGGAGACATACAGGTGTGAA  
ACCATTCCAGTGTAAAACCTTGTGAGCGAAAGTCTCCCGGTCCGACCACCTGAAGACCCACACCCAGGACTC  
ATACAGGTAATAAAGTGAAGAACCCCTCAGCTGTGCGGTGGCCAAGTTGTGAGAAAAGTTTGCCCGGTCA  
GATGAATTAGTCCGCATCAACAATGCATCAGAGAAAACATGACCAAACCTCCAGCTGGCGCTTTGAGGGGT  
CTCCCTCGGGGACCGTTTCAGTGTCCCAGGCAGCACAGTGTGTGAACTGCTTTCAAGTCTGACTCTCCACTC  
CTCCTCACTAAAAGGAAACTTCAGTTGATCTTCTTCATCCAACCTTCCAAGACAAGATACCGGTGCTTCTG  
GAACTACCAGGTGTGCCTGGAAGAGTTGGTCTCTGCCCTGCCTACTTTTAGTTGACTCACAGGCCCTGGA  
GAAGCAGCTAACAATGTCTGGTTAGTTAAAAGCCCATTGCCATTTGGTGTGGATTTTCTACTGTAAGAAGA  
GCCATAGCTGATCATGTCCCCCTGACCCTTCCCTTCTTTTTTTATGCTCGTTTTTCGCTGGGGATGGAATTA  
TTGTACCATTTTCTATCATGGAATATTTATAGGCCAGGGCATGTGTATGTGTCTGCTAATGTAACTTTGT  
CATGGTTTCCATTTACTAACAGCAACAGCAAGAAATAAATCAGAGAGCAAGGCATCGGGGTGAATCTTGT  
CTAACATTTCCCGAGGTGAGCCAGGCTGCTAACCTGGAAAGCAGGATGTAGTTCTGCCAGGCAACTTTTAAA  
GCTCATGCATTTCAAGCAGCTGAAGAAAAAATCAGAACTAACAGTACCTCTGTATAGAAATCTAAAAGAA  
TTTTACCATTGATTAATTCAATGTGAACACTGGCACACTGCTCTTAAGAAACTATGAAGATCTGAGATTT  
TTTTGTGTATGTTTTTACTCTTTTTGAGTGGTAATCATATGTGTCTTTATAGATGTACATACCTCCTTGCA  
CAAATGGAGGGGAATTCATTTTCACTGAGGAGTGTCTTAGTGTATAAAAACCATGCTGGTATATGGCT  
TCAAGTTGTAAAATGAAAGTGACTTTAAAAGAAAATAGGGGATGGTCCAGGATCTCCACTGATAAGACTG  
TTTTTAAGTAACTTAAGGACCTTTGGGTCTACAAGTATATGTGAAAAAATGAGACTTACTGGGTGAGGAA  
ATCCATTGTTTTAAGATGGTCGTGTGTGTGTGTGTGTGTGTGTGTGTGTGTGTGTGTGTGTGTGTGTGT  
TTTTAAGGGAGGGAATTTATTATTTACCGTTGCTTGAATTACTGTGTAAATATATGTCTGATAATGATTT  
GCTCTTTGACAATAAATTAGGACTGTATAAGTACTAGATGCATCACTGGGTGTTGATCTTACAAGATAT  
TGATGATAACACTTAAAATTGTAACCTGCATTTTTTCACTTTGCTCTCAATTAAGTCTATTCAAAAAG

LDLFLLLQDPASTCVPEPASQHTLRSGPGCLQQPEQQGVDRDPGGIWAKLGAAEASAERLQRRSRGASGSEP  
QQMGSDVRLNALLPAVPSLGGGGCALPVSQAAQWAPVLDFAAPPASAYGSLGGPAPPPAPPPPPPPPH  
SFIKQEPSWGAEPHEEQCLSAFTVHFSGQFTGTAGACRYGPFPPPPSQASSGQARMFPNAPYLPSCLES  
QPAIRNQYSTVTFDGTTPSYGHTPSHAAQFPNHSFKHEDPMGQQGSLGEQQYSVPPPVYGCHTPTDSTG  
SQALLLRTPYSSDNLQMTSQLECMTNQMNLGATLKGHSTGYESDNHTTPILCGAQYRIHTHGVRGIQD  
VRRVPGVAPTLVRSASETSEKRPFMCAYPGCNKRYFKLSHLQMHRSRKHTEKPYQCDFKDCERRFSRSDQL  
KRHRQRRHTGVKPFQCKTCQRKFSRSDHLKTHTRTHTGKTSEKPFSCRWPSQKKFARSDELVRHNMHQRN  
MTKLQLAL

THE UNDERLAINED CUG IS THE ONE MARKED IN GENBANK

+++++

#15

NM\_001172415

CUG initiated extension conserved in mammals.

BAG1 BCL2-associated athanogene

Synonyms: HAP; RAP46; BAG1

GCAGGCCGGGGCGGGGCTGGGAAGTAGTCGGGCGGGGTTGTGAGACGCCGCGCTCAGCTTCCATCGCTGGG  
CGGTCAACAAGTGCGGGCCTGGCTCAGCGCGGGGGGGCGCGGAGACCGCGAGGCGACCGGGAGCGGCTGGG  
TTCCCGGCTGCGCGCCCTTCGGCCAGGCCGGGAGCCGCGCCAGTCCGAGCCCCCGGCCAGCGTGGTCCGC

CTCCCTCTGGGCGTCCACCTGCCCGGAGTACTGCCAGCGGGCATGACCGACCCACCAGGGGCGCCGCCGCGC  
GGCGCTCGCAGGCCGCGGATGAAGAAGAAAACCCGGCGCCGCTCGACCCGGAGCGAGGAGTTGACCCGGAG  
CGAGGAGTTGACCCTGAGTGAGGAAGCGACCTGGAGTGAAGAGGCGACCCAGAGTGAGGAGGCGACCCAGG  
GCGAAGAGATGAATCGGAGCCAGGAGGTGACCCGGGACGAGGAGTCTGACCCGGAGCGAGGAGGTGACCAGG  
GAGGAAATGGCGGCAGCTGGGCTCACCGTGACTGTCACCCACAGCAATGAGAAGCACGACCTTCATGTTAC  
CTCCCAGCAGGGCAGCAGTGAACCAGTTGTCCAAGACCTGGCCCAGGTTGTTGAAGAGGTTCATAGGGGTTT  
CACAGTCTTTTCAGAAACTCATATTTAAGGGAAAATCTCTGAAGGAAATGGAAAACCCGTTGTGACACTT  
GGAATACAAGATGGTTGCCGGGTCTGTGGAAGATAGCTGACCAGCTGGAAGAGTTGAATAAAGAGCTTA  
GAAGTTGAAACATTTGGAGAAGTCTGTGGAGAAGATAGCTGACCAGCTGGAAGAGTTGAATAAAGAGCTTA  
CTGGAATCCAGCAGGGTTTTCTGCCAAGGATTTGCAAGCTGAAGCTCTCTGCAAACCTTGATAGGAGAGTA  
AAAGCCACAATAGAGCAGTTTATGAAGATCTGGAGGAGATTGACACACTGATCCTGCCAGAAAATTTCAA  
AGACAGTAGATTGAAAAGGAAAGGCTTGGTAAAAAAGTTTTCAGGCATTCTAGCCGAGTGTGACACAGTGG  
AGCAGAACATCTGCCAGGAGACTGAGCGGCTGCAGTCTACAAAATTTGCCCTGGCCGAGTGAAGGTGTAGCA  
GAAAAAGGCTGTGCTGCCCTGAAGAATGGCGCCACCAGCTCTGCCGTCTCTGGAGCGGAATTTACCTGATT  
TCTTCAGGGCTGCTGGGGGCAACTGGCCATTTGCCAATTTTCTACTCTCACACTGGTTCTCAATGAAAAA  
TAGTGTCTTTGTGATTTTGTAGTAAAGCTCCTATCTGTTTTCTCCTTCTGTCTCTGTGGTTGTACTGTCCAG  
CAATCCACCTTTTCTGGAGAGGGCCACCTCTGCCCAAATTTTCCCAGCTGTTTGGACCTCTGGGTGCTTTC  
TTTGGGCTGGTGAGAGCTCTAATTTGCCTTGGGCCAGTTTTCAGGTTTATAGGCCCCCTCAGTCTTCAGATA  
CATGAGGGCTTCTTTGCTCTTGTGATCGTGTAGTCCCATAGCTGTAAAACCAGAATCACAGGAGGTTGCA  
CCTAGTCAGGAATATTGGGAATGGCCTAGAACAAGGTGTTTGGCACATAAGTAGACCACTTATCCCTCATT  
GTGACCTAATTCAGAGCATCTGGCTGGGTTGTTGGGTTCTAGACTTTGTCTCACCTCCCAGTGACCCTG  
ACTAGCCACAGGCCATGAGATACCAGGGGGCCGTTCTTGGATGGAGCCTGTGGTTGATGCAAGGCTTCT  
TGTCCCAAGCAAGTCTTCAGAAGGTTAGAACCAGTGTGACTGAGTCTGTGCTTGAACCAGGCCAGAG  
CCATGGATTAGGAAGGGCAAAGAGAAGGCACCAGAATGAGTAAAGCAGGCAGGTGGTGAAGCCAACCATAA  
ACTTCTCAGGAGTGACATGTGCTTCTTCAAAGGCATTTTGTAAACCATATCCTTCTGAGTTCTATGTTT  
CCTTCACAGCTGTTCTATCCATTTTGTGGACTGTCCCCACCCCCACCCCATCATTGTTTTTAAAAAATTA  
AGGCCTGGCGCAGCAGCTCATGCCTATAATCCCAGCACTTTGGGAGGCTGAGGCGGGCGGATCACTTGAGG  
CCAGGAGTTTGGAGACCAGCCCAGGCAACATAGCAAAAACCCATTCTGCTTAAAAAATAAAAAAAAAAAAA  
TTAGCTTGGCGTAGTGGCATGTGCCTATAATCCCAGCTACTGGGAGGCTGAGGCACAAGAATCATTTTGAA  
CTGGGAGGTAGAGTTGCTGTGAGCCGAGATTACGCCCTGCCTGACTCCAGCCTGGGTCCAGAGTGAGACT  
CCATCTCAGAAAAAATAAATTGAGTCAGGTGCAGTAGCTCCTTCTGTAGTCCCAGCTACTTGGGAGGC  
TGAGGCTAGAGGATCACTTGAGCCCAGGAGTTTGTAGTCTAGTCTGGGCAACATAGCAAGACCCCATCTCTA  
AAATTTAAGTAAGTAAAAGTAGATAAATAAAGAAAAAATAAAGTGTATGTGCTCATCATAAAGTAGAA  
GAGTGGTTTTGCTTTTTTTTTTTTTTTTGGATTAATGAGGAAATCATTCTGTGGCTCTAGTCATAATTTATG  
CTTAATAACATTGATAGTAGCCCTTTGCGCTATAACTCTACCTAAAGACTCACATCATTGTCAGAGAGAG  
AGTCGTTGAAGTCCCAGGAATTCAGGACTGGGCAGGTTAAGACCTCAGACAAGGTAGTAGAGGTAGACTTG  
TGGACAAGGCTCGGGTCCCAGCCCACCGCACCCCAACTTTAATCAGAGTGGTTCATATTGATCTATTTTT  
GTGTGATAGCTGTGTGGCGTGGGCCACAACATTTAATGAGAAGTTACTGTGCACCAAACCTGCCGAACACCA  
TTCTAAACTATTATATATATATTAGTCATTTAATTTTACATAACTTGAGAGGTAGACAGATATCCTTATTT  
TAGAGATGAGGAAACCAAGAGAATTCAGGTATTAGCGCAAGGTTGTAGAGTAAGCGGCAAAGCCAAGACA  
CAAAGCTGGGTGGTTTTGGTTTTAGAGCCAGTGCTTTTCCCCTCTACTGTACTGCCTCTCAACCAACACAGG  
GTTGCACAGGCCATTCTCTGATTTTTTCTCTTGTCTCTGCCTCTCCCTCTAGCTCCCCTTCTCTCTC  
TGCTCTAGTTCATTTTCTTTAGAGCAGCCGAGTGATCATGAAGTGCAAATCTTGCCATGTCAGTCCCCTG  
CTTAGAACCTCCAATGGCTCACTTTCTCTTTAGGCAAAAGTCTTTACCCCATGCCTTCTCCCATCTCATC  
TCAACCCCTCATTGTTGGCTGTCTGTCTGTGAGCCACTCTTCTTTTTCAGGTCTCAGATGCACTGCACCCT  
CTCCTGCCTGGGGTCTTTGCTCCTGCTACTACCTCTGCTTGAACAGCTCCTCACCTTCTCTTCTCAACCC  
CACCTTTGTATAGGTGACTTTTGTTCATCCTTTCAGAAATCAACTCACATGTCTCTTGCATGGAGAACCCT  
CTACTACTGTGTTGAGACCCTGTCCAGCCCCAGGTGGGATCCTCTCTCGACTTCCCATACATTTCTTTCA  
CAGCATTTACATAGTCCATGATAGTTTACTTGTGGGATTATTTGGTTAATCTTTGCCTTTAACACCAGGGT  
TCCTTGGGTGAAGGAGCTTCTTTATCTTGGTAACAGCATTATTTCAAGCATAACTTGTAATATAGTTATAT  
TACATATATAACATATATATATATAACATAACATATATAACATATATAACAAGCATAACTTGTATATAGT  
CTTGTATATAGTAAGACCTCAATAAATATTTGGAGAACAAAAAATAA

LAQRGGARRPRGDRERLGSRLRALRPGREPRQSEPPAQRGPPPSGRPPARSTASGHDRPTRGAAAGARRPR  
MKKKTRRRSTRSEELTRSEELTLSEEATWSEEATQSEEATQGEEMNRSQEVTRDEESTRSEEVTREEMAAA  
GLTVTVTHSNEKHDHLHVTSQQGSSEPVVQDLAQVVEEVIGVPQSFQKLIKFKGSLKEMETPLSALGIQDGC

RVMLIGKKNSPQEEVELKCLKHLEKSVEKIADQLEELNKELTGIQQGFLPKDLQAEALCKLDRRVKATIEQ  
FMKILEEIDTLILPENFKDSRLKRKGLVKKVQAFLAECTVEQNICQETERLQSTNFALAE

+++++

## #16

### NM\_001099456

Region conserved from zebrafish to human – in non-mammals and even some mammals initiated by AUG.

#### NPW neuropeptide W

Synonyms: L8; L8C; PPL8; PPNPW; NPW

GTACCCACTCCCTGGCACTTCCACTCCTAGAGGGAGGAGGCTGAGCAGGCAGAGAATGGGACGTGTCCCCT  
CAGAGGAGCCTCGAGCCCAGTTCCAGCCAGCGGCCACTCAGTGAAGGTGCTCAAGTACCCACGTCCCCCGC  
CAGCTGCCAGGGTTCCCTCTCCTCCCTCCGTCCCTCCCCCATCTGGGGAGCCAGCGGTACTGAGGGGGC  
GGAACGAGGCGGGGCCACCGAGCGGTTATAGCTGGGCCTGCAGGGGACCCACGGCTCGCCTCCAGCCTCCT  
GCGCTCCGGTACCTGGGCGTCCCAACTCCACTGCGCGCCAAACCCAGCCGAGCCGGTTCGTGGCCCGCCC  
CGCCGGGCGGCCGTGCAGCGGAGCGCCCTGGCGTGGCGCCAGGGGAGCGGGGGGCTCCCGCGAGCCGGCC  
GCGGCTGGCACTGCTGCTGCTTCTGCTCCTGCTGCTGCCGCTGCCCTCCGGCGCGTGGTACAAGCACGTGGCGA  
GTCCCCGCTACCACACGGTGGGCCGCGCCGCTGGCCTGCTCATGGGGCTGCGTTCGCTCACCTATCTGTGG  
CGCCGCGCGCTGCGCGCGGGCCGCGGGCCCTGGCCAGGGACACCCTCTCCCCCGAACCCGCAGCCCGCGA  
GGCTCCTCTCCTGCTGCCCTCGTGGGTTTCCAGGAGCTGTGGGAGACGCGACGCAGGAGCTCCCAGGCAGGGA  
TCCCCGTCCGTGCGCCCCGGAGCCCGCGCGCCCCAGAGCCTGCGCTGGAACCGGAGTCCCTGGACTTCAGC  
GGAGCTGGCCAGAGACTTCGGAGAGACGTCTCCCGCCAGCGGTGGACCCCGCAGCAAACCGCCTTGGCCT  
GCCCTGCCTGGCCCCGGACCCTTCTGACAGCGTCCCCCGCCCGCCGTGGCGCCTCCGCGCCTGACCCAG  
GAGGAGTGGCCGCGCGCTTCCAGGAGCCGCTCATAGACCCCGCCTGCCGTCCGGTCAATAAAAATCCGCCTG  
ACTCCTGCGCCCCCGCATGCGAAAAA

LAWRPGERGAPASRRLALLLLLLLLPLPSGAWYKHAVSPRYHTVGRAAGLLMGLRRSPYLWRRALRAAAG  
PLARDTSLPEPAAREAPLLLPSWVQELWETRTRRSSQAGIPVRAPRSPRAPEPALEPESLDFSGAGQLRRD  
VSRPAVDPAANRLGLPCLAPGPF

+++++

## #17

### NM\_002467

CUG initiation conserved in some mammals but the sequence of the extension is not  
MYC v-myc myelocytomatosis viral oncogene homolog (avian)

Synonyms: MRTL; c-Myc; bHLHe39; MYC

ACCCCCGAGCTGTGCTGCTCGCGGCCGCCACCGCCGGGCCCGGCCGCTCCCTGGCTCCCCTCCTGCCTCGA  
GAAGGGCAGGGCTTCTCAGAGGCTTGGCGGGAAAAGAACGGAGGGAGGGATCGCGCTGAGTATAAAAGCC  
GGTTTTCGGGGCTTTATCTAACTCGCTGTAGTAATTCCAGCGAGAGGCAGAGGGAGCGAGCGGGCGGCCGG  
CTAGGGTGGAAAGAGCCGGGCGAGCAGAGCTGCGCTGCGGGCGTCCCTGGGAAGGGAGATCCGGAGCGAATAG  
GGGGCTTCGCCTCTGGCCCAGCCCTCCCGCTGATCCCCAGCCAGCGGTCCGCAACCCTTGCCGCATCCAC  
GAAACTTTGCCATAGCAGCGGGCGGGCACTTTGCACCTGGAACCTTACAACACCCGAGCAAGGACGCGACTC  
TCCCAGCGGGGAGGCTATTCTGCCAATTTGGGGACACTTCCCCGCCGTGCCAGGACCCGCTTCTCTGA  
AAGGCTCTCCTTGACGTGCTTAGACGCTGGATTCTTTCGGGTAGTGGAAAACCAGCAGCCTCCCGCGAC  
GATGCCCCTCAACGTTAGCTTACCAACAGGAACTATGACCTCGACTACGACTCGGTGCAGCCGTATTTCT  
ACTGCGACGAGGAGGAGAACTTCTACCAGCAGCAGCAGAGCGAGCTGCAGCCCCCGCGGCCAGCGAG

GATATCTGGAAGAAATTCGAGCTGCTGCCACCCCGCCCCTGTCCCCTAGCCGCGCTCCGGGCTCTGCTC  
GCCCTCTACGTTGCGGTACACCCTTCTCCCTTCGGGGAGACAACGACGGCGGTGGCGGGAGCTTCTCCA  
CGGCCGACCAGCTGGAGATGGTGACCGAGCTGCTGGGAGGAGACATGGTGAACCAGAGTTTCATCTGCGAC  
CCGGACGACGAGACCTTCATCAAAAACATCATCATCCAGGACTGTATGTGGAGCGGCTTCTCGGCCGCCG  
CAAGCTCGTCTCAGAGAAGCTGGCCTCCTACCAGGCTGCGCGCAAAGACAGCGGCAGCCCGAACCCCGCCC  
GCGGCCACAGCGTCTGCTCCACCTCCAGCTTGTACCTGCAGGATCTGAGCGCCGCCGCTCAGAGTGCATC  
GACCCCTCGGTGGTCTTCCCCTACCCTCTCAACGACAGCAGCTCGCCCAAGTCCTGCGCCTCGCAAGACTC  
CAGCGCCTTCTCTCCGTCTCGGATTCTCTGCTCTCCTCGACGGAGTCCTCCCCGAGGGCAGCCCCGAGC  
CCCTGGTGTCCATGAGGAGACACCGCCCACCACCAGCAGCGACTCTGAGGAGGAACAAGAAGATGAGGAA  
GAAATCGATGTTGTTTCTGTGGAAAAGAGGCGAGGCTCCTGGCAAAGGTGAGAGTCTGGATCACCTTCTGC  
TGGAGGCCACAGCAAACCTCCTCACAGCCACTGGTCTCAAGAGGTGCCACGTCTCCACACATCAGCACA  
ACTACGACGACCTCCCTCCACTCGAAGGACTATCCTGCTGCCAAGAGGGTCAAGTTGGACAGTGTGAGA  
GTCCTGAGACAGATCAGCAACAACCGAAAATGCACCAGCCCCAGGTCCTCGGACACCGAGGAGAATGTCAA  
GAGGCGAACACACAACGTCTTGGAGCGCCAGAGGAGGAACGAGCTAAAACGGAGCTTTTTTTCGCTGCGTG  
ACCAGATCCCGGAGTTGGAAAACAATGAAAAGGCCCCCAAGGTAGTTATCCTTAAAAAAGCCACAGCATA  
ATCCTGTCCGTCCAAGCAGAGGAGCAAAAGCTCATTCTGAAGAGGACTTGTGCGGAAACGACGAGAACA  
GTTGAAACACAACTTGAACAGCTACGGAAGTCTTGTGCGTAAAGGAAAAGTAAGGAAAACGATTCCTTCTA  
ACAGAAATGTCCTGAGCAATCACCTATGAACTTGTTCAAATGCATGATCAAATGCAACCTCACACCTTG  
GCTGAGTCTTGAGACTGAAAGATTTAGCCATAATGTAAGTGCCTCAAATTGGACTTTGGGCATAAAAGAA  
CTTTTTTATGCTTACCATCTTTTTTTTTTCTTTAACAGATTTGTATTTAAGAATTGTTTTTAAAAATTTT  
AAGATTTACACAATGTTTCTCTGTAAATATTGCCATTAATGTAATAACTTTAATAAAACGTTTATAGCA  
GTTACACAGAATTTCAATCCTAGTATATAGTACCTAGTATTATAGGTACTATAAACCTAATTTTTTTTTAT  
TTAAGTACATTTTGTCTTTTTAAAGTTGATTTTTTTCTATTGTTTTTAAAGAAAATAAAATAACTGGCAAAT  
ATATCATTGAGCCAAAAAAAAAAAAAAAAAAAAA

LDFFRVVENQPPATMPLNVSFTNRNYDLDYDSVQPYFYCDEEENFYQQQQSELOPPASEDIWKKFELL  
PTPPLSPSRRSGLCSPSYVAVTFPSLRGDNDDGGGFSFSTADQLEMVTELLGGDMVNQSFICDPDDETFIKN  
IIIIQDCMWSGFSAAKLVSEKLASYQAARKDSGSPNPARGHSVCSTSSLYLQDLSAAASECIDPSVVFYP  
LNDSSSPKSCASQDSSAFSPSSDLSLSTESSPQGSPEPLVLHEETPPTTSSDSEEEQEDEEEDVVSVEK  
RQAPGRSESGSPAGHSKPPHSPLVLKRCHVSTHQHNYAAPPSTRKDYPAAKRVKLDVSRVLRQISNNR  
KCTSPRSSDTEENVKRRTHNVLERQRRNELKRSFFALRDQIPELENNEKAPKVVILKKATAYILSVQAEEQ  
KLISEEDLLRKRREQLKHKLEQLRNSCA

C)

#1

NM\_002006

Does not appear conserved beyond humans.

**FGF2 fibroblast growth factor 2 (basic)**

Synonyms: BFGF; FGFB; HBGF-2; FGF2

CGGCCCCAGAAAACCCGAGCGAGTAGGGGGCGGCGCGCAGGAGGGAGGAGAACTGGGGGGCGGGGAGGCTG  
GTGGGTGTGGGGGGTGGAGATGTAGAAGATGTGACGCCGCGGCCCGGGTGCAGATTAGCGGACGCGG  
TGCCCGCGGTTGCAACGGGATCCCGGGCGCTGCAGCTTGGGAGGCGGCTCTCCCAGGCGGCGTCCGCGGA  
GACACCCATCCGTGAACCCAGGTCCCGGGCCGCGGCTCGCCGCGCACCAGGGGCCGGCGGACAGAAGAG  
CGGCCGAGCGGCTCGAGGCTGGGGGACCGGGGCGCGGCCGCGCGCTGCCGGGCGGGAGGCTGGGGGGCCG  
GGGCCGGGGCCGTGCCCCGAGCGGGTTCGGAGGCCGGGGCCGGGGCCGGGGACGGCGGCTCCCCGCGCGG  
CTCCAGCGGCTCGGGGATCCCGGCCGGGCCCGCAGGGACCATGGCAGCCGGGAGCATCACACGCTGCC  
GCCTTGCCCCGAGGATGGCGGCAGCGGCCTTCCCGCCCGGCCACTTCAAGGACCCCAAGCGGCTGTACTG  
CAAAAACGGGGGCTTCTTCTGCGCATCCACCCGACGGCCGAGTTGACGGGGTCCGGGAGAAGAGCGACC  
CTCACATCAAGCTACAACCTCAAGCAGAAGAGAGAGGAGTTGTGTCTATCAAAGGAGTGTGTGCTAACCGT

TACCTGGCTATGAAGGAAGATGGAAGATTACTGGCTTCTAAATGTGTTACGGATGAGTGTTCCTTTTTTGA  
ACGATTGGAATCTAATAACTACAATACTTACCGGTCAAGGAAATACACCAGTTGGTATGTGGCACTGAAAC  
GAACTGGGCAGTATAAATCTGGATCCAAAACAGGACCTGGGCAGAAAGCTATACTTTTTCTTCCAATGTCT  
GCTAAGAGCTGAATTTAATGGCCACATCTAATCTCATTTTACATGAAAGAAGAAGTATATTTTAGAAATTT  
GTTAATGAGAGTAAAAGAAAATAAATGTGTATAGCTCAGTTTGGATAATTGGTCAAACAATTTTTTATCCA  
GTAGTAAAATATGTAACCATTGTCCCAGTAAAGAAAATAACAAAAGTTGTAATAATGTATATTCTCCCTTT  
TATATTGCATCTGCTGTTACCCAGTGAAGCTTACCTAGAGCAATGATCTTTTTTACGCATTTGCTTTATTC  
GAAAAGAGGCTTTTTAAATGTGCATGTTTAGAAAACAAAATTTCTTCATGGAAATCATATACATTAGAAAAT  
CACAGTCAGATGTTAATCAATCCAAAATGTCCACTATTTCTTATGTCATTTCGTTAGTCTACATGTTTCTA  
AACATATAAATGTGAATTTAATCAATTCCTTTTATAGTTTTATAATTCTCTGGCAGTTCCCTATGATAGAG  
TTTATAAAAACAGCTCCTGTGTAAACTGCTGGAAGTTCTCCACAGTCAGGTCAATTTTGTCAAACCTTCTC  
TGTACCCATACAGCAGCAGCCTAGCAACTCTGCTGTTGATGGGAGTTGTATTTTTCAGTCTTCGCCAGTCA  
TTGAGATCCATCCACTCACATCTTAAGCATTCTTCTGGCAAAAATTTATGGTGAATGAATATGGCTTTAG  
GCGGCAGATGATATACATATCTGACTTCCAAAAGCTCCAGGATTTGTGTGCTGTTGCCGAATACTCAGGA  
CGGACCTGAATTTCTGATTTTTATACCAGTCTCTTCAAAAATTTCTCGAACCCTGTGTCTCCTACGTAAAAA  
AAGAGATGTACAAATCAATAATAATTACACTTTTAGAACTGTATCATCAAAGATTTTTCAGTTAAAGTAGC  
ATTATGTAAAGGCTCAAAACATTACCCTAACAAAGTAAAGTTTTCAATACAAATTTCTTGCCTTGTGGATA  
TCAAGAAATCCAAAATATTTTCTTACCCTGTAAATTCAGAAGCTTTTGAAATGCTGAATATTTCTTTG  
GCTGCTACTTGGAGGCTTATCTACCTGTACATTTTTGGGGTTCAGCTCTTTTTTAACTTCTTGCTGCTCTTTT  
TCCAAAAGGTAAAATATAGATTGAAAAGTTAAAACATTTTGCATGGCTGCAGTTCCCTTGTCTTCTGAG  
ATAAGATTCCAAAGAATTTAGATTCAATTTCTTCAACACCGAAATGCTGGAGGTGTTTGTATCAGTTTTCAAG  
AACTTGAATATAAATAATTTTATAATTCAACAAAGTTTTTACATTTTATAAGTTGATTTTTCAATTA  
AATGCAAATTTGTGTGGCAGGATTTTTATTGCCATTAACATATTTTTGTGGCTGCTTTTTCTACACATCCA  
GATGGTCCCTCTAACTGGGCTTTTCTAATTTTTGTGATGTTCTGTCTATTTGCTCCCAAAGTATTTAGGAGA  
AGCCCTTTAAAAGCTGCCTTCTCTACCCTTTGCTGGAAAGCTTACAATTTGTACAGACAAAAGATTTT  
TGTTCCAATACTCGTTTTGCCTCTATTTTTCTTGTGTTGTCAAATAGTAAATGATATTTGCCCTTGCAGTAA  
TTCTACTGGTGA AAAACATGCAAAGAAGAGGAAGTACAGAAAACATGTCTCAATTTCCCATGTGCTGTGACT  
GTAGACTGTCTTACCATAGACTGTCTTACCCTATCCCTGGATATGCTCTTGTTTTTTCCCTCTAATAGCTA  
TGGAAAGATGCAATAGAAAGAGTATAATGTTTTAAAACATAAGGCATTTCTGCTGCCATTTTCAATTAGCTA  
CTGACTTCCCTTACAATTTGAGATTTGCCATAGTTTAAACATGGTTAGAAAACAATGAAAGCAATAAAGAA  
AAATCTAGGCCGGGTGCAGTGGCTCATGCCTATATTCCCTGCATTTGGGAGGCCAAAGCAGGAGGATCGC  
TTGAGCCCAGGAGTTCAAGACCAACCTGGTGAACCCCGTCTCTACAAAAAACACAAAAAATAGCCAGGC  
ATGGTGGCGTGTACATGTGGTCTCAGATACTTGGGAGGCTGAGGTGGGAGGGTTGATCACTTGAGGCTGAG  
AGGTCAAGGTTGCAGTGAGCCATAATCGTGCCACTGCAGTCCAGCCTAGGCAACAGAGTGAGACTTTGTCT  
CAAAAAAGAGAAATTTTCTTAAATAAGAAAAGTAATTTTTACTCTGATGTGCAATACATTTGTTATTTAAA  
TTTATTATTTAAGATGGTAGCACTAGTCTTAAATTTGTATAAAATATCCCCTAACATGTTTAAATGTCCATT  
TTTATTCAATATGCTTTGAAAATAAATTATGGGGAAATACATGTTTGTATTTAAATTTATTATTAAGATA  
GTAGCACTAGTCTTAAATTTGATATAACATCTCCTAACTTGTTTAAATGTCCATTTTTATTCTTTATGTTT  
GAAAATAAATTTATGGGATCCTATTTAGCTCTTAGTACCCTAATCAAAGTTTCGGCATGTAGCTCATGAT  
CTATGCTGTTTTCTATGCTGTGGAAGCACCAGGATGGGGTAGTGAGCAAATCTGCCCTGCTCAGCAGTACC  
ATAGCAGCTGACTGAAAATCAGCACTGCCTGAGTAGTTTTGATCAGTTTAACTTGAATCACTAACTGACTG  
AAAATTTGAATGGGCAAATAAGTGCTTTTTGTCTCCAGAGTATGCGGGAGACCCTTCCACCTCAAGATGGATA  
TTTCTTCCCAAGGATTTCAAGATGAATTGAAATTTTTAATCAAGATAGTGTGCTTTATTCTGTTGTATTT  
TTTATTATTTAATAATACTGTAAGCCAAACTGAAATAACATTTGCTGTTTTATAGGTTTGAAGAACATAGG  
AAAACTAAGAGGTTTTGTTTTTATTTTTGCTGATGAAGAGATATGTTTAAATATGTTGTATTGTTTTGTT  
TAGTTACAGGACAATAATGAAATGGAGTTTATATTTGTTATTTCTATTTTGTATATTTAATAATAGAATT  
AGATTTGAAATAAATAATAATGGGAAATAATCTGCAGAATGTGGGTTTTCTGGTGTTTCCCTCTGACTCTA  
GTGCACTGATGATCTCTGATAAGGCTCAGCTGCTTTATAGTTCTCTGGCTAATGCAGCAGATACTCTTCT  
GCCAGTGGTAATACGATTTTTTTAAGAAGGCAGTTTTGTCAATTTAATCTTGTGGATACCTTTATACTCTTA  
GGGTATTATTTTATACAAAAGCCTTGAGGATTGCATTCTATTTTTCTATATGACCCTCTTGATATTTAAAAA  
ACACTATGGATAACAATTTCTTCAATTTACCTAGTATTATGAAAGAATGAAGGAGTTCAAACAATGTGTTTC  
CCAGTTAACTAGGGTTTTACTGTTTGGCCAAATATAAATGTTTAACTGTTTGTGATGGCAGTATTTCTAAAG  
TACATTGCATGTTTTCTTAAATACAGAGTTTTAAATAATTTTCAAGTAATTTTATAGATGATTGAGCTTTCATCAT  
TAAGAATATCTTTTGTTTTTATGTTGAGTTAGAAATGCCTTCATATAGACATAGTCTTTTCCAGACCTCTACTG  
TCAGTTTTTCAATTTCTAGCTGCTTTTCCAGGTTTTATGAATTTTCCAGGCAAAGCTTTAATTTATACTAAGCTT  
AGGAAGTATGGCTAATGCCAACGGCAGTTTTTTTTCTTCTTAAATTTCCACATGACTGAGGCATATATGATCTC  
TGGGTAGGTGAGTTGTTGTGACAACCACAAGCACTTTTTTTTTTTTTTAAAGAAAAAAGGTAGTGAATTTT

TAATCATCTGGACTTTAAGAAGGATTCTGGAGTATACTTAGGCCTGAAATTATATATATTTGGCTTGGAAA  
TGTGTTTTCTTCAATTACATCTACAAGTAAGTACAGCTGAAATTGAGAGACCATAAGAGTTCACATGA  
AAAAATCAATTTATTTGAAAAGGCAAGATGCAGGAGAGAGGAAGCCTTGCAAACCTGCAGACTGCTTTTT  
GCCCAATATAGATTGGGTAAGGCTGCAAAACATAAGCTTAATTAGCTCACATGCTCTGCTCTCACGTGGCA  
CCAGTGGATAGTGTGAGAGAATTAGGCTGTAGAACAAATGGCCTTCTCTTTCAGCATTACACCACACTACAA  
AATCATCTTTTATATCAACAGAAGAATAAGCATAAACTAAGCAAAGGTCAATAAGTACCTGAAACCAAGA  
TTGGCTAGAGATATATCTTAATGCAATCCATTTTCTGATGGATTGTTACGAGTTGGCTATATAATGTATGT  
ATGGTATTTTGTGATAAAGTTTTAAAAATCAAGCTTTAAGTACATGGACATTTTTAAATAAAAATAT  
TTAAAGACAATTTAGAAAATTGCCTTAATATCATTGTTGGCTAAATAGAATAGGGGACATGCATATTAAGG  
AAAAGGTCATGGAGAAATAATATTGGTATCAAACAAATACATTGATTTGTATGATACACATTTGAATTTGA  
TCCAATAGTTTAAGGAATAGGTAGGAAAATTTGGTTTCTATTTTTTCGATTTTCCTGTAATCAGTAAATA  
ATAATTTCTAGCTTATTTTATATTTTCTTTGTTTAAATACTGAGCTCAGTAAGTTGTGTTAGGGGATTATT  
TCTCAGTTGAGACTTTTCTATATGACATTTTACTATGTTTTGACTTCTGACTATTAATAATAATAGTAG  
ATACAATTTTATAAAGTGAAGAATTATATAACTGCTTTATAAAGTACTGCTTTATTATATTTATTTTCAA  
GTTCAATTTAAAGGCTACTATTCATCCTCTGTGATGGAATGGTCAGGAATTTGTTTTCTCATAGTTTAAATTC  
CAACAACAATATTAGTCGTATCCAAAATAACCTTTAATGCTAAACTTTACTGATGTATATCCAAAGCTTCT  
CATTTTTCAGACAGATTAATCCAGAAGCAGTCATAAACAAGAATAAGGTTGGTATGTTTCTAATGATATTAT  
TTCTACTAATGGAATAAACTGTAATATTAGAAAATTATGCTGCTAATTATATCAGCTCTGAGGTAATTTCTG  
AAATGTTTTCAGACTCAGTCGGAACAAATTTGAAAATTTAAATTTTTATTCTTAGCTATAAAGCAAGAAAGTA  
AACACATTAATTTCTCAACATTTTAAAGCAATTAATAAATAAAGATAACACACCAATATCTTCTTCAG  
GCTCTGACAGGCCTCCTGGAACTTTCCACATATTTTCAACTGCAGTATAAAGTCAAGAAATAAAGTTAAC  
ATAACTTTTCACTAACACACACATATGTAGATTTTCAAAAATCCACCTATAATTGGTCAAAGTGGTTGAGAA  
TATATTTTTTAGTAATTGCATGCAAAATTTTTCTAGCTTCCATCCTTTCTCCCTCGTTTTCTTTTTTGT  
GGGGAGCTGGTAAGTATGAAATTTTTTCCACCTTTTCTTTTCAGGAAATATAAGTGGTTTTTGTGGTT  
AACGTGATACATTCTGTATGAATGAAACATTGGAGGGAAACATCTACTGAATTTCTGTAAATTTAAATATT  
TTGCTGCTAGTTAACTATGAACAGATAGAAGAATCTTACAGATGCTGCTATAAATAAGTAGAAAATATAAA  
TTTCATCACTAAAATATGCTATTTTAAATCTATTTTCTATATTGTATTTCTAATCAGATGTATTACTCTT  
ATTATTTCTATTGTATGTGTTAATGATTTTATGTAAAATGTAATTGCTTTTCTCATGAGTAGTATGAATAAA  
ATTGATTAGTTTGTGTTTTCTTGTCTCCC

LVGVGGGDVEDVTPRPGGCQISGRGARGCNGIPGAAWEAALPRRRPRRHPSVNPRESRAAGSPRTGRGRTE  
ERPSGRLGDRGRGRALPGGRLGGRGRGRAPERVGGGRGRGRTAAPRAAPAARGSRPAGTMAAGSITTL  
PALPEDGGSGAFPPGHFKDPKRLYCKNGGFFLRIPHGRVDGVREKSDPHIKLQLQAEERGVVSIKGVCAN  
RYLAMKEDGRLLASKCVTDECFFFERLESNNYNTYRSRYKTSWYVALKRTGQYKLGSKTGPQKAILFLPM  
SAKS

+++++

#2

## NM\_014293

No conservation found.

### NPTXR neuronal pentraxin receptor

Synonyms: NPR; NPTXR

CGGCCGCGGCGACAGCTCCAGCTCCGGCTCCGGCTCCGGCTCCGGCTCCGGCTCCGGCTCCCGCGCCTGCCCGCTC  
GGCCAGCGCGCCGGGCTCCGCGCCCCGACCCCGCCGCGCCTGCCGGGGCCTCGGGCGCCCCGCC  
GCCCGCCTCAGCTGAAGTTCTGGCCGTCTGCTGGCCCGGGCATGCTGGCGTTCCTCGGTGCCGTCA  
CTGCATCATCGCCAGCGTGGCCCTGGCGGCCAGCCCGGCGCGGGCCTGCCCGCGCGCGCCACAATGCTT  
CGGTGCCTCGGGCGCCGCGCTCCCCGGGCGCCGAGCGGAGCCTGAGCGCGCTGCACGGCGCGGGCGGT  
TCAGCCGGGGCCCCGCGCTGCCCGGGGCACCCGCGGCCAGCGCGCACCCGCTGCCGCCCGGGCCCCCTGTT  
CAGCCGCTTCTGTGCACCGCTGGCTGCTGCCTGCCCGTCCGGGGCCAGCAGGGGGACCGGGCGGGCG  
CTGCGCCGGGCGAGCGCAAGAGCTGCTGCTGCTGCAGAGCACGGCCGAGCAGCTGCGCCAGACGGCGCTG  
CAGCAGGAGGCGGCATCCGCGCCGACAGGACACCATCCGTGAGCTCACC GGCAAGCTGGGCCGCTGCGA  
GAGCGCCTGCCGCGCGGCCCTCCAGGGCGCGGGCCCCCGCCGACACCATGGCCGACGGGCCCTGGGACT

CGCCTGCGCTCATTCTGGAGCTGGAGGACGCCGTGCGCGCCCTGCGGGACCGCATCGACCGCCTGGAGCAG  
GAGCTTCCAGCCCCTGTGAACCTCTCAGCTGCCCCAGCCCCAGTCTCTGCTGTGCCACCGGCCTACACTC  
CAAGATGGACCAGCTGGAGGGGAGCTGCTGGCCCAGGTGCTGGCACTGGAGAAGGAGCGTGTGGCCCTCA  
GCCACAGCAGCCCGCCGGCAGAGGCAGGAAGTGGAAAAGGAGTTGGACGTCCTGCAGGGTCGTGTGGCTGAG  
CTGGAGCACGGGTCTCAGCCTACAGTCCTCCAGATGCCTTCAAGATCAGCATCCCCATCCGTAACAACATA  
CATGTACGCCCCGCGTGCAGGAAGGCTCTGCCCGAGCTCTACGCATTACCCGCCTGCATGTGGCTGCGGTCCA  
GGTCCAGCGGCACCGGCCAGGGCACCCCTTCTCCTACTCAGTGCCCGGGCAGGCCAACGAGATTGTACTG  
CTAGAGGCGGGCCATGAGCCCATGGAGCTGCTGATCAACGACAAGGTGGCCCAGCTGCCCTGAGCCTGAA  
GGACAATGGCTGGCACCACATCTGCATCGCCTGGACCACAAGGGATGGCCTATGGTCTGCCTACCAGGACG  
GGGAGCTGCAGGGCTCCGGTGAGAACCTGGCTGCCTGGCACCCCATCAAGCCTCATGGGATCCTTATCTTG  
GGCCAGGAGCAGGATACCCCTGGGTGGCCGGTTTGTGACCCAGCCCTTTGTGGTGCATTTGCCAGTT  
TAACCTGTGGGACACGCCCTGACACCAGCCAGTCTGGGCATTGCCAAGTGCCTGCCTGCCTACTGCTGG  
GCAACGTCCTTCCCTGGGAAGACAAGTTGGTGGAGGCCTTTGGGGGTGCAACAAAGGCTGCCTTCGATGTC  
TGCAAGGGGAGGGCCAAGGCATGAGGGGCCACCTCATCCAGGGCCCCTCCCTTGCCTGCCACTTTGGGGAC  
TTGAGGGGGGTATATTCCCTCCTCAGCCTGCCACGCACTGGCCTTCCCTCCTGCCCCACTCCTGGCTGT  
GCCTCCCATTTCCCTCACCTGTACCCACACCTCCAGAATGCCCTGCCCTGCGAGTGTGTCCCCTGTCCCC  
ACCTGAGTGGGGAGGAGCGTCTCAAGTGAACAGTGGGAGCCTGCCACCTGGCACTGCCTGGAGTTGTCT  
CTTACCCACCCCTCCCTGCCCATCAACTGTATCTGATTTCACTAATTTTGCAGCACCCCCAGTAGGGTAG  
GATTGTGTATGAGGGGACCCACTATCTCAGTGGTGGGGTGGCCGCCCCGCCCTTGTCCCCATGCAA  
CAGGCCCAGTGGCTTCCCTTTCAGGGCCACAACAGGCTGTAGAAGGGGATGACGAGGACATCAGAGGTTAG  
ACTTACCCTCCTCCCTCTTCCACCAGCTGCCAGTCAAGGGCAGTGGGATCTCGATGGAGCCTCCCCCCCC  
CCCCACCCATGCCTCCCTCTTCCCTCCTCTTCCCTCCTCTCTTGTGTGTAGCGTTTTGAATGTTGGTTCCA  
TGCCTGGCCCAGCCCCACCTCAGTCTCCAGGACATTCCTTTCCAGCTCCAGCCTGGAGGGAAGGGGACAA  
AGACCCCAGGAGGCCAAAGGGCTGCAGTACCCCTTGTGCTCACCCATAGTGTGGCCACTGGTATAGTCA  
TCGCTCTCCCTCCATGCCAAGGACAGGACTTGGACCGCTTCCAGCCTGGGCTGGGAGCAGCCCTAAGGTAGA  
GGCCTCATGGCCCAGGAGACCCACCTCTGGCAGAGCCACATTACCTACCCTGTGCATGGTCTGGGGCAG  
CAAGGAAGAAGCTCAGAGGGTGGGGAGAAGCATGAAGCAGTGGCAGAGCACTGGGTGAGAGGGAGAAGAC  
CTTGGTTCCCTAGCCAGCCCTGCTAATGTGCTGTGTGGCCTTCTGTAAGTCCCTGCCCTCTCTGGGCCTGGC  
TTCCCTCATTCTGTGAGCTGAGCCCTCGCTTTGGTCAATTTGCTCTCCAGATTGGGTGTGAGCTTCTGTG  
ATTCAGGTGATATGTGGGGAAGCTCTGGTGACCCTGGGCTTTCGAGGGGTAGATCCCAGGACTCGGCA  
GTGGATGGGATGCAGCCAGTCAAGGTTAGGGTGCAGAGACTCAGAGTCCAGGGCAAGGTTCAAGGCAG  
ACTAACCTCATGCATGGATTGTAATAAACCAGCTCCCTTTGGATCAACCCAGCCTGGCACCCCTTGCCTGTC  
TGAGAGTGTCTCAAAGGGCTGATGGCTTCCCTGGTCCCCTTGGATCATACCAGCTTCCCCAAGAGAGTGT  
AGAATCTTAAGAGCTGAGAGGCCGGGCACGGTGGCTCACGCCTGTAATCCCAGCACTTTGGGAGGCTGAGA  
CAGGCAGATCACTTGGGTGAGGAGTTCGAAGTGCAGCCTGGCCAACGTGGTGAACCCCATCTTCACTAAA  
AATACAAAACCTTAGCTGGTTAGGTGGTGCATGCCTGTAGTCCCAGCTACTCGGGAGGCCGAGGCAGAAGAA  
TCTCTTGAACCTGAGGAGGTGGAGGTTGCAGTGCAGCCAGATCACGCCATTGCACTCCAGCCTGGGCAACAG  
AGCAAGACTCCATCTCAAAAAATAATAATAATCTTAAAGATGAGAAAAGCCACCCCATCTGGCACCACAG  
CTGCATCTTGTCTGTGAGAAATGGGGAAGAGTTAGGGAGGACACGTGACCTGCACAGGATCACAGAGCAT  
GGGGCAGAGCCAGGACTAGAGCTCAGGGCATCTGACTCCCTCTTCCAGTGTCTTCCCCCTCCATGTTGCCT  
GCCCCGTAAGACCTTTGAGTTTCACTACACCTAAGCAGGTAGACATCCGCGAGGTGAGATGCTTTCCAAC  
ATGACACCTGAACATCTTCCCTTATGCAACACCCAAACATCTTGGCATCCCCACCCAGGAAGTGCGGGGA  
GGAGGTTATGATCCCTGGGCGCTTCCGGCAGAATGGAGAGCTGAGGTGTCCCTCCCCTGCTAGTCACCTACC  
AGGTGTCTGAGCAGCTGCATGCTCCCTGGCTCAAGTGGGCACTGTACCTTTTGCCTGCCTTTTTTGTTCCT  
ATCTCCACTCCCTGAGGCCACTTAGCCTGAGACATGATGCAAGAGCTGCAGGCCGGGGGGCTCAGTGCCAT  
GGAAGTACTCCAAGTTGCATTGCCCTCCGCGCCCAGATCCTGCTTTCCATTTGAGAACATAAATAGATT  
GCCCAGCCCCTCCAGTACAATCCCCTGGAAGAAAAGGCAATGGCGGGCTTCCAGCCAGCCTGCTGAGACC  
TAGGTTGCCACGGTAACAGCCAAAGACATCAACCCAAAGTCTGGTCAAGTGTCTCATCATACTGGCACTG  
TTGCTGGGGTACGGCAGAATTCAGAACTTCAATTTTCAAGTGCAGCCAAAGCTTGGTGTGTTTCTGTTATTGT  
TTTGAAGAAGGTAGCTCTTGTGGAGGACTTGGGAGAAGGATGGGGTCTTAGGAAGGAGGTGACAGCACTTG  
CATGGTCACTTGGAGCCACACACAGCTCAACCCCAAGTCTTTATGCTTTGTACAGTGAAGATGAGACC  
TCTGACGTCCAAGCCTTGTTCCTGTGCTGCATCACCCACTCAGCCTTCCAAAGGGAACAGGAACAAATTT  
CCCAGCACCACTGTTTGGGTCCCCTTTTCCCTATCTTCTGCTGCCCTGAGCACATCCAAGCAGACAGGGA  
AAGAGGAGTGCAGACATGGCCCAGTGCATCCTGAGCTGCTCCTGGCTGATAACCACGATGGAGCCCGTGT  
TGTCTGCCATCTGGCACTGCCTGAGTGTGGCACAGGCACCGTCTGTTGATCTCACAACACAGTTCTAA  
GTTAGGACGTTCTTGGCTCCGTTAGACAGGTGAGGAACTGGGGCACAGAGAGGTGATGTCTGCCTGG  
TGTCAATCAGCTAGCAAGTGTGAGGCCAGATTTCAAACCAAGGGGTTACGTCCAGGGGCTGAGTTCC

CACTCACCTGTGTAGAGTGCCATCTGGGCACCATTGCTCCAGACGTGTTCCGACCCCTTTCCCAGCCCACA  
GGGCTTGAAGTGAAGGAACAGAGGCAGGGGTGGGCCAGCCCCAGGGCCAGGGTCCCCTTGGTGAAGCCGT  
GCCAGGGGGCTCAGCTGCTTCAGGGAATGTGTCCCTCCCACCATGGGCCAGAGCTTCAGCCCTTCTTTAGC  
TCAGCTAGAGTTACAGGAGAGCCAAAAAAGAAAAGGAAGCTGAGCATCTCCCGAGTCTGGGCAGGGAAG  
GGGAGGAAATTGCTGCTTCTCCAACCTTTGCTTGGGGCCAAGCCCTGCACCAGTTGCTTCCCAGCTGTTA  
TCTGCCAGATCTTCCCATCTTGTGGCATGTGGTGGCCCCACCAACATCCCAAGGGGACCAATCCCCTTGGC  
ACCACTTTGCATCACCTGGGACCACAGATTTGGACAGGAAGGGCTCTGAGAAGAGGGCCAAAGCCCTCATT  
TACAGATGAGGAAGCTGAAGCCCGGGGAGGGGAGCGACCCTCAAGGCCACCCAGCTGGACACGGGAGACTT  
GAGCCCAGCCTTCTGACTGCATTAGCCCTCTCTAGGACGCAGCAGCCTCTCCCCAGCACTGAGTCCCCC  
TCCTTTGTGTGTCCCAGCACCTTGGCCTGAGTAACTTGGAAAGGGGCTCCCTCCCAGAGAAGGGACTAC  
TCTCTTACCCTTTATTCCAGCTGCCTGCCACCCAGACCCACCTCCCACCTGACCCCGACCCCTG  
GTTGGGGAAGGGGCTCACATGGGCCAGGCTGAGTGTGAGTGTGAGTGTGAGTGTGAGTGTGAGTGTGAGT  
TTAGTGCACCCTACTGACAACCCCTCCCAGCCTTGGCCCTTCTCCTCTCCCTGTTTTGTACATAAATTG  
ACATGAGCTGCAACATGTGTGCGTGTGTGTGCGTGTGTGTGTGTGTGTGTGTGTGTGTGTGTGTGTGTGT  
GTTTTGTTACCTTTTTTGTTTTTGTAACTTGAATGTTCAAATAAACATGCTGTTTACTCTGA

LKFLAVLLAAGMLAFLGAVICIIASVPLAASPARALPGGADNASVASGAAASPGPQRSLSALHGAGGSAGP  
PALPGAPAASAHPLPPGPLFSRFLCTPLAAACPSGAQQGDAAGAAPGEREELLLLQSTAEQLRQTALQOEA  
RIRADQDTIRELTGKLRCEGLPRGLQGAGPRRDTMADGPWDSPALILELEDAVRALRDRIDRLEQELPA  
RVNLSAAPAPVSAVPTGLHSMQDQLEGQLLAQVLALEKERVLSHSSRRQRQEVEKELDVLQGRVAELEHG  
SSAYSPPDAFKISIPIRNNMYARVRKALPELYAFTACMWLRSRSGTGQGT PFSYSVPGQANEIVLLEAG  
HEPMELLINDKVAQLPLSLKDNGWHHCIAWTTRDGLWSAYQDQELQSGENLAAWHPKPHGILILGQEQ  
DTLGGFRDATQAFVGDIAQFNLWDHALTPAQVLGIANCTAPLLGNVLPWEDKLVFAFGGATKAADFVCKGR  
AKA

+++++

### #3

## NM\_021182

No conservation found.

### HMHB1 histocompatibility (minor) HB-1

Synonyms: HB-1; HLA-HB1; HMHB1

CCACATCCCAGGAGGCCGAGGCGGCTTGGCCCCGATCTCAGAAGCCGGGCAGGCCCTGAGCCTTCTGACCT  
CACATCCTCTGCCACACCACAGTGGAGAAACCAGAAAGTGGAGGAGCAGCCAGAATGCAGAGAAGAAAAAAG  
AGGTTCTCTGCATGTTTTGGAAGTCGGAATTGGTTGAAGTTGAAGATGATGTGTATCTGAGGCACAGCTCTT  
CCCTGACTTATAGGCTTTGACTGCTGTTGAGGTTTGACTCGAAGCCCAGAGTTTTGGTGTGGATGAGCA  
GGGACAAATTGCTGAGCATGAAGAAGAGTAAATTAAGCAAGTGAACATATGCCCTTTGCCTCTGCTCTG  
CACAGTGAATGAAAAGTCAACCTTTGAAAAAAAAAAAAAAAA

+++++

### #4

## NM\_001169118

The first annotated AUG (not conserved) actually precedes the supposed UUG initiation codon. In any case nothing upstream of the second in-frame AUG is conserved beyond humans.

### STIM2 stromal interaction molecule 2

Synonyms: FLJ39527; KIAA1482; STIM2

GGCGGAGCGTGGTACTACGACCAGCGCGGGCCGGAGGGGGCGGGGGGATGCGCCGCGGGCGGGCGGGCGCG  
GGAGCTGGGGTTGGTGTGGCGGCGCCAGAGCAGCGGATCCCAGTCTCGCCGAGCAGCAGCGCGGGTGT  
CGTGCACCGCCTGAAGACGCCGTACCTTTCTACCCCCACCTTTTTTTTTTTTTTTTTTTTTAAATAACCGGAA  
CCAATGAACGCAGCCGGGATCAGAGCTCCGGAGGCCGCCGGTGCCGATGGGACCAGGCTGGCGCCCGGCGG  
GAGCCCGTGTCTGAGGCGGGCGGGGGCGGCCGGAGGAGTGCAGCGCGGGCGGTGGTGGCGCCTCGCGGAGCCG  
GCGAGCTGCAGGCGGGCCGGGGCGCCGCTGCGCTTTACCCCGGCTTCTCCTCGGCGCCTTCATCCCGCCTCG  
ACTCCTGGCCCAGCGTGGGGCTGGCTGCTGCGGGCGGGCGCTGGGCTGCGTTGCTGGTGTCTGGGCTGCT  
GGTAGCCGGAGCGGGACGGATGCGAGCTTGTGCCCGGCACCTCCGCGGGCGGGCGGGCGACTGGCTCTG  
CCGCAACTGCCGCCTCCTCTCCCGCCGCGGGCGGGCGGATAGCCCGGCGCTCATGACAGATCCCTGCATG  
TCACTGAGTCCACCATGCTTTACAGAAGAAGACAGATTTAGTCTGGAAGCTCTTCAAACAATACATAAAACA  
AATGGATGATCAAAAGATGGTGAATTGAAGTAGAGGAAAGTATGAATTCATCAGAGAAGATATGAAAT  
ATAAAGATGCTACTATAAAACACAGCCATCTGCACAGAGAAGATAAAACATATAACGATTTAGGATTTATGG  
AAACGATGGAAGAACATCAGAAGTTTATAATTGGACCTTGAAGACACTCTTCAGTGGTTGATAGAGTTTGT  
TGAACTACCCCAATATGAGAAGAATTTAGAGACAACAATGTCAAAGGAACGACACTTCCCAGGATAGCAG  
TGCACGAACCTTCATTTATGATCTCCAGTTGAAAATCAGTGACCGGAGTCAACAGACAAAACTTCAGCTC  
AAGGCATTGGATGTGGTTTTGTTGGACCTCTAACACGCCACCTCATAACTGGATGAAAAGATTTTATCCT  
CACAGTTTCTATAGTAATTGGTGTGGAGGCTGCTGGTTTGCTTATACGCAGAATAAGACATCAAAAAGAAC  
ATGTTGCAAAAATGATGAAAGATTTAGAGAGCTTACAACTGCAGAGCAAAGTCTAATGGACTTACAAGAG  
AGGCTTGAAAAGGCACAGGAAGAAAACAGAAATGTTGCTGTAGAAAAGCAAAATTTAGAGCGCAAAATGAT  
GGATGAAATCAATTATGCAAAGGAGGAGGCTTGTGCGCTGAGAGAGCTAAGGGAGGGAGCTGAATGTGAAT  
TGAGTAGACGTGATATGCAGAACAGGAATTTGGAACAGGTTGCGATGGCTCTGAAAAGGCCGAAAAGAA  
TTTGAAGTGAAGCAGTTGGTCTGTTCCAGATGCACTTCAGAAATGGCTTCAGTTAACACATGAAGTAGA  
AGTGCAATACTACAATATTAAGAACAAAACGCTGAAATGCAGCTAGCTATTGCTAAAGATGAGGCAGAAA  
AAATTAAGAAAGAGAAGCAGCTTTTGGGACTCTGCACGTTGCACACAGCTCCTCCCTAGATGAGGTA  
GACCACAAAATCTGGAAGCAAAGAAAGCTCTCTCTGAGTTGACAACTTGTTTACGAGAACGACTTTTTTCG  
CTGGCAACAAAATTGAGAAGATCTGTGGCTTTAGATAGCCATAACTCAGGACTCCCCAGCCTGACCTCTT  
CCCTTTATTCTGATCACAGCTGGGTGGTGTGATGCCAGAGTCTCCATTCCACCCTATCCAATTGCTGGAGGA  
GTTGATGACTTAGATGAAGACACACCCCAATAGTGTCAAAATTTCCCGGGACCATTGGCTAAACCTCTGG  
ATCATTAGCCAGAAGCAGCCTGTGCCGTTACGCCCGCAGCATTGTGCCGTCTCGCTCGCTCAGCCTCAGC  
GAGCTCAGCTTGTCCACACGCCCCCCCCCGTCAACCCCTCGGCACCCTCACCACCCGCAACACACACCA  
CACTCCTTGCTTCCCCTGATCCAGATATCCTCTCAGTGTCAAGTTGCCCTGCGCTTTATCGAAATGAAGA  
GGAGGAAGAGGCCATTTACTTCTCTGCTGAAAAGCAATGGGAAGTGCCAGACACAGCTTCAGAATGTGACT  
CCTTAAATCTTCCATTGGAAGGAAACAGTCTCCTCCTTTAAGCCTCGAGATATACCAAACATTATCTCCG  
CGAAAGATATCAAGAGATGAGGTGTCCCTAGAGGATTCTCCCGAGGGGATTGCGCTGTAACCTGTGGATGT  
GTCTTGGGGTTCTCCCGACTGTGTAGGTCTGACAGAACTAAGAGTATGATCTTCAGTCTGCAAGCAAAG  
TGTACAATGGCATTTTGGAGAAATCCTGTAGCATGAACCAGCTTTCCAGTGGCATCCCGGTGCCTAAACCT  
CGCCACACATCATGTTCCCTCAGCTGGCAACGACAGTAAACCAGTTGAGGAAGCCCCAAGTGTGCCAGAAT  
AAGCAGCATCCACATGACCTTTGTATAATGGAGAGAAAAGCAAAAAGCCATCAAAAATCAAAAGCCTTT  
TTAAGAAGAAATCTAAGTGAAGTGGCTGACTTGGTGAATCATGTTCAAGTGGCATCTGTAAACTATTATC  
CCCCACCCTCCACTCCCCACCTTTTTTTGGTTAATTTTAGGAATGTAACCTCATTGGGGCTTTCCAGGC  
CGGATGCCATAGTGAACATCCAGAAGGGCAACTGTCTACTGTCTGCTTATTTAAGTACTATATATAATC  
AATTCATCAAGCCAGTTATTACTGAAAAATCATTGAAATGAGACAGTTTACAGTCATTTCTGCCTATTTAT  
TTCTGCTTTGTTCTCAGTGTATATATGCAACATTTTGTGAAAGCCACGATGGACTTACAAGCTTTAATG  
GACTCGTAAGCCAGCATGGGCTTGCAAAAATTTCTTGTTTACCAGAGCATCTTCTTATCTTTCCACAGAGC  
TATTTACATCCTGGACTATATAACTTAAAAGAAGTAAAACGTAATTGCACTACTGTTTTCCAGACTGGAAA  
AAAAAAAATCTCTGCAAGTGAACCTGTATAGAGTTTATAAAATGACTATGGATAGGGGACTGTTTTCACT  
TTTAGATCAAAATGGGTTTTTAAAGTAGAACCTAGGGTTTTCTAATTGACTTGATTTCTGGAAATGAAAACCC  
TCGCTTTTTATTATGGGAAGCTTCTTGAAGTGCATTTACTATTGTGAAGTTTCAAGTCCCCTGTAAAGATC  
ATGTTGTTTTGTTTTCCCAGGGCTTTCACTGTGATTTACTGCATTGCAGGCTGTATGATAAAACACACAT  
AATTTAAAGAGAGAAGGCTCTTGATTCTTATGCAAGTGAAGAGTTGAAACTTGATTGAAGGACTTAAAA  
CATTACAACTTAAAGCCGAGGTGGGGGGATATGGGGATTGAGGCAATTGTTTACACACTTTGAATAACTG  
CAAAGGATTTACGGTTTTGTGAAAATGTGTACTGTGGAAGATAATAAATGAAGACATTATTGTGTGGG  
ATTGTGCTGATTTTTGTTGATAACACAAAAAACTATGTTTTCTGGAGAGCTGTGTAAGCTGTCTTGTG  
CTTAGTTGCAATATAAGAAATAGTGTATTTTTGGACGTAAGTTGTCAACAAATTTCTATTTTATATTGTTA  
TATTTTTATGTAGTTTGAATGTAAAATGTTCTAATATCAAGATTAACAAATATAAATTTATGGTGCATT  
TAGAAAAA

+++++

## #5

### NM\_005354

From the GenBank description:

In addition, three non-AUG codons also support translation, an ACG codon (in-frame with JunD) and a CUG are positioned in the 5'-untranslated region, and a CUG codon (also in-frame with JunD) is located downstream of the short open reading frame.

In reality the non-AUG sites were observed in the rat sequence. They are not conserved in human.

#### JUND jun D proto-oncogene

Synonyms: AP-1; JUND

AGGAGCCGCGCCAGTGGAGGGCCGGGCGCTGCGGCCGCGGCCGGGGCGGGCGCAGGGCCGAGCGGACGGG  
GGGGCGCGGGCCCCCGGGAGGCCGCGGCCACTCCCCCGGGCCGCGCGCGGGGGAGGCGGAGGATGG  
AAACACCCTTCTACGGCGATGAGGCGCTGAGCGGCCTGGGCGGCGGCCAGTGGCAGCGGCGGCAGCTTC  
GCGTCCCCGGGCGCTTGTTCGCCGGGGCGCCCCGACGCGCCGCGGCCGAGCATGATGAAGAAGGACGC  
GCTGACGCTGAGCCTGAGTGAGCAGGTGGCGGCAGCGCTCAAGCCTGCGGCCGCGCCGCTCCTACCCCC  
TGCGCGCCGACGGCGCCCCAGCGCGGCACCCCCGACGCGCCTGCTCGCCTCTCCCGACCTGGGGCTGCTG  
AAGCTGGCCTCCCCGAGCTCGAGCGCCTCATCATCCAGTCCAACGGGCTGGTCACCACCACGCCGACGAG  
CTCACAGTTCCTCTACCCCAAGGTGGCGGCCAGCGAGGAGCAGGAGTTCGCCGAGGGCTTCGTCAAGGCC  
TGGAGGATTTACACAAGCAGAACCAGCTCGGCGCGGGCGCGGCCGCTGCCGCCCGCCGCCCGCCCGGG  
GGGCCCTCGGGCACGGCCACGGGCTCCGCGCCCCCGGCGAGCTGGCCCCGGCGGGCGGCCCGCCGAAGC  
GCCTGTCTACGCGAACCTGAGCAGCTACGCGGGCGGCGCCGGGGGGCGCGGGGGCGCCGCGACGGTGCCT  
TCGCTGCCGAACCTGTGCCCTTCCCGCCGCCACCCCCAGGCGCGTTGGGGCCCGCGCCTGGCTGCG  
CTCAAGGACGAGCCACAGACGGTGCCTGACGCTGCCGAGCTTCGGCGAGAGCCCGCCGTTGTGCGCCATCGA  
CATGGACACGCAGGAGCGCATCAAGGCGGAGCGCAAGCGGCTGCGCAACCGCATCGCCGCTCCAAGTGCC  
GCAAGCGCAAGCTGGAGCGCATCTCGCGCCTGGAAGAGAAAGTGAAGACCCTCAAGAGTCAGAACACGGAG  
CTGGCGTCCACGGCGAGCCTGCTGCGCGAGCAGGTGGCGCAGCTCAAGCAGAAAGTCTCAGCCACGTCAA  
CAGCGGCTGCCAGCTGCTGCCCCAGCACCAGGTGCCCGCGTACTGAGTCCGCGCGCGGGGCGCATGCGCGG  
CCACCCTCCCCAAGGGGCGGGCTCGCGGGGGGTGTGCTGGGCGCCCCGACTTGGAGAGGGTGGCGCCCT  
GGGACCCCCCTCCCCGAGTGTGCCAGGAACCTCAGAGAGGGCGCGCCCCGGGATTCCCCCCCCCTCG  
AGGTGCCAGGACTCGACAAGCTGGACCCCCCTGCTCCCGGGGGCGAGCGCATGACCCCCCGCCCTCG  
CGTGCCTCTTTCCCCCGCGCGGCCCGCCCGTGTTCACAAACCCGCGGTCTCGGCTGCCCTTTGTACA  
CCGCGCCGGAAGGGGGCTCCGAGGGGGCGAGCCTCAAACCCTGCCTTCTTTACTTTTACTTTTTTT  
TTTTTTTCTTTGGAAGAGAGAAGAACAGAGTGTTCGATTCTGCCCTATTTATGTTTCTACTCGGGAACAAA  
CGTTGGTTGTGTGTGTGTGTGTGTGTGTGTGTGTGTGTGTGTGTGTGTGTGTGTGTGTGTGTGTGTGT  
CCGCCCTTTTCTCGATCTCGCTCCCCCTTCGGTTCTTTTCGACCGGTCCCCCTCCCTTTTTTTGTTCTGT  
TTTGTGTGTGTGTGTGTGTGTGTGTGTGTGTGTGTGTGTGTGTGTGTGTGTGTGTGTGTGTGTGTGTGT  
AAAGTCTCGTTACGCCAGCTCGGCACAAAAAAAAAAAAAAAAAAAAA

+++++

## #6

### NM\_001098579

Region conserved from zebrafish to human but it is very difficult to analyze because there are at least four human transcript variants with one of them having 5' AUG codon.

MRV11 murine retrovirus integration site 1 homolog

Synonyms: IRAG; JAW1L; MRV11

GGCGCTGGCCCAGGGTCTTCTCCAGGCTCACATGCTTGCTGGAGGCTCCAGGCGGGTGGGGAGATCTGCAG  
GGTCCCTTTGTTCCCGTCCGGCCAGGACAGTGTCCAGTGGCACGAGTTGCCATGGGGACTGCCATCTGCTG  
TGTGGATAACCCATCGGAGGGGCCAGGGTGTAGCGACTGCCCCAAAGGCCAGCCTGCCCTGAGCCCTGAGG  
CCAGCTGGTTCGGCTTTCCCTGCCATTATCCCCGAGCCAGGCCGGAGTGGGGCTCCAGAGGAGCTCTCGG  
CTCTAAGTCCCAGCCCCTCTCAGAGGAGGCGTGCAGGCGAGGTTCTGCAGCCAGAGGCTTCTCGGCTCTGA  
GCTCCGGAGCCAGATGTAACATTGACCTTAAATGGTAAAAGCTCCCCAGAGTGAAGAGAGGCTGGCCAGAG  
GAGGAAAGGAGAATAACTCAGTTTTAGACAGGGTCTCGCACTGTCACCCAGGCTGGAGTGCAGTGGTGCAA  
CCCCACCTCCCGGGTTCAAGCAATTCTCATGCCTCAGCCTCCCAAGTAGCTGGGATTACAGGGTCTCTCTA  
CCGAGGAGTATCTTGCAGTCCAACCTCCCACGATTGTCCTGACTGGGGATGCCACTTCACCAGAAGGAGAA  
ACCGACAAAAACCTGGCCAACAGAGTTCACAGTCCCCACAAGAGGCTTTCTCACCGACACTTGAAGGTGTC  
CACTGCCTCCCTGACATCTGTGGACCCCGGGGCACATCATTGACCTGGTGAATGACCAGCTGCCAGACA  
TCAGCATCTCAGAGGAGGACAAGAAGAAAAACCTGGCGCTGCTGGAAGAAGCCAAGTTGGTGTAGTGAGCGA  
TTCTGACCCCGCGTGGGAGGAAGTCCAGGAGCAGCCCCGGAGACTCCCCATCAGTGTTCCTCCCGAACCT  
CAGCCCCAGCGCTTCTCTACATCTCTCGGAGCAACTCACTTACAGTCCCCACCCCGCAGGTTTGGATG  
TGTGCAGTGGCCCGCCATCCCCTCTGCCTGGAGCACCACCACAGAAGGGGGATGAGGCCGACGTCTCTTCA  
CCTCACCTGGCGAGCCTAACGTCCCCAAAGGGCTAGCTGACAGGAAGCAGAATGACCAGAGGAAAGTGTG  
TCAGGGCAGGCTGGCTCCTCGTCTCTCCAGTTGAGAAGTCCAAAGAGATTGCAATAGAACAAAAGGAAA  
ACTTCGATCCCCTCCAGTACCCCGAGACCACACCCAAAGGCCTAGCTCCTGTTACAAACAGCAGTGGGAAA  
ATGGCCCTGAACAGCCCTCAGCCTGGCCCCGTGGAGAGCGAGCTGGGGAAGCAGCTCTTGAAAACGGGCTG  
GGAGGGCAGCCCTCTGCCGAGAAGTCCAACCCAGGATGCGGCAGGAGTGGGTCCCCCAGCCTCCCAGGGGA  
GAGGCCAGCTGGAGAGCCGATGGGGCCCCGAGGCTGGCTCCAAAGCTGAGCTTCCACCCACTGTGTCCCGG  
CCCCCGCTGCTGCGAGGGCTCTCCTGGGACAGTGGCCCTGAAGAACCTGGCCCCCGGCTGCAGAAAGTGT  
TGCCAAGCTGCCACTGGCAGAGGAAGAAAAGCGTTTTGTCAGGCAAGGCCGGCGCAAGCTGGCCAAGGCC  
CTGGTCTCAAAGACTTTTCAGATACAAGTGCAGCCCGTGCAGGATGCAGAACTGACCAAGCTCCGAGAGGAG  
CACATCCTGATGAGAAATCAGAACTTAGTGGGGCTCAAGCTTCAGACCTTAGTGAAGCAGCTGAGCAGGA  
AAAAGGGCTTCTTCTGAACTCTCCCCAGCTATTGAGGAAGAAGAGTCAAAGAGTGGCTTAGATGTCATGC  
CTAATATTTCTGATGTGCTGCTGCGCAAACCTGCGGGTCCACAGGAGTCTCCCTGGAAGTGGCCCTCCACTC  
ACTGAAAAGGAAGTTGAGAAGCTGTTTGTGCAACTGTCTTGGCCTTTAGAAATGACAGCTACACTCTGGA  
ATCTAGAATTAACCAGGCTGAAAGGGAAACGCAACCTGACAGAGGAGAACTGAGAAAAGAACTGGAAAAC  
TCAAAGCTTCCATTACGTCTCAGCTTCACTCTGGCACCCTGTGAGCACCGGGAAACCTACCAGAAGTTG  
CTGGAGGACATCGCTGTCTGCACCCGCTGGCTGCCCCGCTCTCCAGCCGAGCTGAGGTGGTAGGCGCCGT  
CCGCCAGGAAAAGCGCATGTGAAAAGCAACGGAAGTGTGATGCAGTATGTGGAGAATCTAAGAGGACGT  
ATGAGAAGGACCATGCGGAGCTCATGGAGTTTAAAAAGCTTGCAAATCAGAATTCAAGCCGACGTGTGGC  
CCCTCTGAAGATGGGGTCCCTCGCACGGCACGGTCCATGTCCCTCACGCTGGGAAAAGAATATGCTCGCCG  
GAGGGTACGCTTGTGTGGTTTCTAAGTTTAAATGCCCTGAATCTGCCTGGCCAAACTCCCAGCTCATCAT  
CCATTCCCTCCTTACCAGCCTTGTGGAATCACCCAATGGGAAAGGCAGCCTACCTGTCACTTCAGCACTG  
CCTGCACTTTTGGAAAATGGAAAGACAAATGGGGACCCAGATTGTGAAGCCTCTGCTCCTGCGCTGACCCT  
GAGCTGCCTGGAGGAGCTTAGTCAAGGAGACCAAGGCCAGGATGGAGGAAGAAGCCTACAGCAAGGGATTCC  
AAGAAGGTCTAAGAAGACCAAAGAACTTCAAGACCTGAAGGAGGAGGAGGAAGAACAGAAGAGTGAGAGT  
CCTGAGGAACCTGAAGAGGTAGAAGAACTGAGGAAGAGGAAAAGGGCCCAAGAAGCAGCAAACCTGAAGA  
ATTGGTCCATTTCTTACAAGTCATGTATCCCAAACCTGTGTGAGCACTGGCAAGTGATCTGGATGATGGCTG  
CAGTGATGCTGGTCTTGACTGTTGTGCTGGGGCTCTACAATTCCTATAACTCTTGTGCAGAGCAGGCTGAT  
GGGCCCTTGGAAAGATCCACTTGCTCGGCAGCCAGAGGGACTCCTGGTGGAGCTCAGGACTCCAGCATGA  
GCAGCCTACAGAGCAGTAGGAAACCTCACACCTAGCCAGTGCCTGCTCTGAGACACTCAGACTACCACCC  
TTTCCCCAAGTATAACGTCAAGGCCAAGTGTGGACACACTGCCGCCCATCCCATCAGGTCATGAGGAAGGG  
TTCTTTTAACTCGGCACTTCTGTGGGAGCTATTATACACAGTGACTTGATGTTCTTGGAGGATCAACA  
AAACTGCCCTGGGAAAGCATCCAGTGGATGAAGAAGTCACTTCCCAAGGAACCTTATTGGAAGGGAAGG  
TCTCCTGCCCCTAGCTCAGGTGGCTGGGGAGAACTAAAACACCTTCACTGGTGGTTGGGGGTAAGGAGCGG  
GGCAAGGAGGAGGAGGTAGGGGGCAGTAAAAAACTTACTCTTTTTTCTCTCTGTAATTGGTTATC  
AGGAAGAATTTGCTTAATGACTAACACCCTAAGCACTCAGCACTGGAATTTGGAGTTGCAAGTACTACT  
TCCCATTTCCCATCTCATTTTTCAATAACTTACGCCTCCCATTCTTTCTTTTGGAAATGAGAGTTTCTTTT  
CAGAAGTAGGAAAGGCTTCTCAGAAAAAAGTATAGGCTGAATTTAGCTCAGTGCTTGAATGG  
GAAGATATGAATTATTATATACGCATCTGTCCACACATACACACATACTGTTGTGTACACACACACAACAT  
GCCTGTGCACAGAGCCAACAACCCTTCAAAGTGTGCTCTGGGTGTGTACCTCTGGATAAATAAGATGCAT  
GCCAAGCCAACCCACAGATTTTACCAGTGTGGGGCAGTACCAGGCACCTGTTCAATGAGCTGTCCACAT

GGATTGAAGATGTTTTAAAAACACAGAAAACCTCATGGCTTCAATGGCAGACTTACTAGTCTCCATTTCAA  
TGCCAACTCTGAGCTGCTGTACAGCACAATCTATTCCCTATTCTCTCTTTGAAAACAGTTAACCCACCTCA  
CAGGTGAATGAGGAGAGAAGATGTGCTTTCTGCTTCAGTCTCTTACTCTGTGTGTGACCACATGCAAGAGT  
AAACTTGCACCTCAGTGCTTCAGTTCAAATGGGGTTTTCCAACCCCAAGTATAAATTAGGGGTGTTTCAGAGCA  
TCCCCAGTTATTTAGCACAACACTGAAGGAGCACATCCCCTCTCCATTTTGACTTCTCTCCCCACTTTTTAC  
AGCCACTGCCTTCATCAGTTTTGTAGAGGTTTTGATTTCCATGTGGGTTTTGTTGTCAATTGTTTTGCATTTT  
TGTTTTGTTATTGATATTGTTTGCTTTTCATTGCTAAAACCTCATATACGACTTACTATGAGCCAAGCACTGT  
TCTCAGTATTACATAGGTATGAATTCATTTAAGTCCTGAAGAAAAAGAAAAAAAATACGAAGTGGATATT  
ACCCTTCCCATTTTCAAATAAGGAAACTGAAGCACAAAAAGAACAAGTAACTTGACAAGGACACCCCGGTA  
GTAAATCATGGGGCTGGAGCTCAACCCAGGGTAGGCTGGCTCCAGAGCTGTGCTCTCCTTGACTCTTCTG  
ATGGTCTCCTAGCTGGAAGCCTCACATTTTCAGTCTCATTCCCCCAAGTGGCCCATCAGCTTCCATCTCT  
GGCTCCCCAACTAAACAGTTTTCTCTCATAGTGCTGGACCTCCACTACTAGTTTTTTTTTCCAGCTGTTCTT  
CTCTTTTTCTTCAGGTCCTCTCTCGACCGAGTGCAAAAATTATCCCCTCCATACCAGCTTTGATGACCTT  
CCTTCCATACTCCTCACCAGACACAACATAATAGGTACACACTCCTCTGTGCTTTCTGGCAGTTTTTAAA  
CATTATTATTATTGACCTTTACCTATAGTATAACCATGGCCTATTTATGTATCCATCTCCCCTAGCATTTTTT  
CCTCAAAGACAAGAACCATGTCTTACCCTCTCTTGGGTAAGTGCCTAGCATGGTGGCTGACGCTTGGGAG  
GGTGTCAATTAATGTTGCTCAAAGAACAAGCAAACATTTAAGGTGGTGGAGAGCAGCCTGGGGACAGCTG  
ACATGCTGCATGCTTCTCAGTACCAGCACCATCACAATGCAAAAAGCAACATCTTTCTTAACTCAGCTTA  
TTCTGTTTTTTCAGTCTACTCTGTGAGAGAGCAGGAATGAGACCAGACTAGCAACACCATTGCCAAGCTCAA  
GGACTGGGCTCAATGCAGTCACTCCTTCAGAGAGACCCCCACCCCAAGCATGCCCCACTTTAAAATAGCA  
TGTTTTATTGAAGGGGGCATCCTTTACAGTAGCTAGAAAATGACTGAGGCCCAAGCCAGGGTTGATCAAGGA  
TGTGCCATTAAGGTAAAGAGTTACAGAGCAGGGCAGAGGGACTCTGGGGGCAGAAGTGGATGATTTGCCCG  
GCCTCTTCCAGGGGGTCTGGATACAACCTGAAGGAGCTTTAGCTACATGAGGCCCTCAGAGCCAAAGACAGG  
ATGCAAAATAGAGTTCTAGAGAGTGGCCGTGGAAGCAGAACTCCAGGTGGGGAATGTTCAATCTCTGCCTCC  
CTTAAAGCAGGGCCAGGCTCAGCTGGCCCCATTGTTCACTTGGTCCACAAGTTTTCTACCTTTGTTTCTGGA  
TGAGTCAAAGGCCAGGAAGGCAGTTATGGAGAGCTCCTGCACCTCCAGCTGCCCCACAGAAAAGCCTGCAA  
GAGTACTTCCAGGCACAGGCCCTCTCCCACCCTATTCCATTTGTAAGCAAGGGAGGTGAGGAAAAGGACA  
TCTCCAAAAGGGAGCATAAGAATAGCCATATATACAGGGCTGAAAAAGTGTCTCATGAGTCCATCTTTTCT  
GGAAAGCAAAGACCAGCCTGAAGCAGTGGGAGCTGCTGCCCAAGCGGTAGTGAAGTGGAGAGAAAACAGGCC  
CTGGATTTTTCAAGTGGATGTGGATCTGAAGAGTCCCCAAATGCCTCTGAAGTCTGACATCTCTGTCTAG  
CCCTAGGAGTCTGTTCCCTGCCTTCAGTTGAGAGTGTGTTTTGTGTCATTGTTGATGTCACCTCCTA  
AAAAGACCTTCACTTTCTGGCTGCCACAAAGCCATATGTGTTGCTCCCCATATACAGCCTGACAGAGTAAA  
TGGAGAGGAAGTGTGGATTTGTGTATCACTGGCTATCAGTTCCCTCATGTTGTTAAGCCTCACACAGGTGT  
GCTAGCATTGAACTGTAGAGTGTACATACCTGAGTTTGAAAATAAAAGCACATTTCCAAACCTCAAAAAA  
AAAA

LTGDATSPEGETDKNLANRVHSPHKRLSHRHLKVSTASLTSVDPAGHIIDLVDQLPDISISEEDKKNLA  
LLEEAKLVSERFLTRRGRKSRSSPGDPSAVSPNLSASPTSSRSNSLTVPTPPGLDVCSGPPSPLPGAP  
PQKGDEADVSSPHPGEPNVPKGLADRKQNDQRKVSQGRAPRPPVVEKSKEIAIEQKENFDPLQYPETTPK  
GLAPVTNSSGKMLNSPQPGPVESELGKQLLKTGWEGSPLPRSPTQDAAGVGPASPQGRGPAGEPMGPEAG  
SKAELPPTVSRPPLLRGLSWDSGPEEPGPRQLQKVLAKLPLAEEEKRFAGKAGGKLAKAPGLKDFQIQVQPV  
RMQKLTKLREEHILMRNQNLVGLKLPDLSEAAEQEKGLPSELSPAIEEESKSGLDVMPNISDVLLRKLRLV  
HRSLPGSAPPLTEKEVENVFVQLSLAFRNDSTLESRIQAERERNLTEENTEKELENFKASITSSASLWH  
HCEHRETYQKLLIEDIAVLHRLAARLSSRAEVVGAVRQEKRMKATEVMMQYVENLKRTEYKDHAELEMEFKK  
LANQNSSRSCGPPSEDGVPRTARSMSLTLGKNMPRRRVSVAVVPKFNALNLPQTPSSSSIPSLPALSESPN  
GKGLPVTSPALPALLENGKTNGDPDCEASAPALTLSCLEELSQETKARMEEEAYSKGFQEGLEKKTKELDL  
KEEEEEEKSESPPEEPEVEETEETEEEEKGPRSSKLEELVHFLQVMYPKLCQHWQVIWMMAAVMLVLTVVGLY  
NSYNSCAEQADGPLGRSTCSAAQRDSWSSGLQHEQPTAQ

+++++

#7

NM\_001085386

No conservation found.

### NF-E4 transcription factor NF-E4

Synonyms: NF-E4

GACAATTCCTGTTTACGGGAAGACTATAAAACCCCTGCCCCCTACTCATTGGTGCTGACGCCATTTTAGGCC  
TTAGCCTGCCTGCACCCAGGCGCTCATTAAAAACAGCAGGTTGCTCCACACTGCCTCGTGTTGTCTGTTGGC  
ACACTCTCAAGAGTTTGAACGGATACAAGAATCTTTCATCTGGTGCCGAAACCCGGGAGGGGCTCCGGTCT  
TCGTCCCCCGTGGACCTACCCCTCCGCCCCAGAAAGCAGGCCACAGCAGCCGGACAAAGGAAGCTCCTCAG  
CCTCCAGTTGCTTCTCTGTGCATGCACATCAGTCACTGATCTCACCTACTGGGGCCCTGCAGGCCATGGGG  
CCACAGCTCCACACAGAAGCCTCCTAGCAATCCACCTCCACCTGGTGCCTGCTTCAAGTGCGGCAATGAAG  
GCCACTGGCCCCACACAATGCCCAAACCCAGGTAAACCCACGAGGCCATGCCCCCTCTGCGGAGGACCCCCAC  
TGGAAGTTGGACTGTGAGCGGCCCTGCAAGGACCACCCCATCCCTTCCTGAGCCAATCAAACCCCTCCTA  
CTCGGATCTCGTCAGCCTTGCCGCTGAAGACTGATAGTGCCTTGGAACAGACACCCAGCAACTACCATCG  
CTTCATCTGAGCCAAGGGTAAACCTGATGGTGGCAGGCCAGTCCCAAGGCGCAAGGCCACTTGTGCCAGC  
AGTGTGAGTCAGCAAGATAGCAGAAGCAGGAAGAGAGCCGGCCAGAAGACACCTACTCTGACTGGGAGACA  
CGTACCCCTGAAGATTGAGAAAGAGGCCATCCAGGTACCACATAGCAGTTACATCAGACTGGGACATTTCC  
TGTTTACAGGAGACTATAAAACCCCTGCCCCCTACTCATTGGTGCTGACGCCATTTTAGGCCCTCAGCCTG  
CCTGCACCCAGGTACTCATTAAAAACAGCGTGTGGTCCAAAAA

LPRVVCWHTLTKSLNGYKNLSSGAETREGLRSSSPVDLPLRPRKQATAAGQRKLLSLQLLLCACTSVDLTY  
WGPAGHGATAPHRSLLAIHHLVLPASSAAMKATGPHNAQTQVNPRGHAPSAEDPTGSWTVSGPCKDHPHPF  
LSQSNPPTRISSALPLKTDSDALEQTPQQLPSLHLSQG

+++++

## #8

### NM\_199072

No conservation found.

### MDFIC MyoD family inhibitor domain containing

Synonyms: HIC; MDFIC

CCCAGGCCGGCTCTGGCCTCCTGACCCAGACAGCGCAGGGCGCGAGGGATCGCGCGGCCGAGCCCGGGTGC  
CGCCGCTCCCAGCATCGGGGCCGCTAGCCAAGAGTTTCGAGGCCCTTCCCGATCCGGATGTGATGAAAAAGAG  
CAACAGAGGGGAGAAGTGTTCAGGATTGTAGAGTGGAAAGAGGGGAAAGAGAGGCAGAGAGGGGGAAGGCC  
CCCTCGCAGGGGAGCCGGCTGGAGTGAGCTGGCTGGAAAGAGGGGGCGGAGTCCGCGGAGTCAAGCCGCC  
ACCGCTGCCGAGTTGCCGCCACTGCGGCGTCTGGGCTGAGCCGGAGGGAGGCGGGAGGACCGCGCAGGGGC  
GGCCGCCCGCTCGTCAGGCCACCGGGGCGAAAATGCGGCCGCTGCCGGAGGCTCGCTAACTTTCCGGGGC  
GGAAGAGGAGGAGGAGGAGGAGGAAGGGGCTTGAGCGACTACGGGGGATGCGGAGAAGCAGTCAGTTCC  
CTGCACCCAGCACCTCACAGCCCTTCCCTCCGTGCGCCCTGCCGGGCGGCGAGCTAGGCGGCAGCGGCGCGG  
CGCGGGCTCGGCGGAGCGGCCATGTCGCGGCGGGGCGAAGCCCTCGCTCCCGGGCCCGTGGGGCCGCGAGC  
GCGTGGCCGAGGCGGGCGGGCGGCCAGCTGGGCTCCACAGCCAGGGAAAATGTGATAAAGACAATACTGAG  
AAAGATATAACTCAAGCTACCAATAGCCACTTCACACATGGAGAGATGCAAGACCAGTCCATTTGGGGAAA  
TCCTTCGGATGGTGAATCATTAGAACCCACCTCAGCGCTTGCCCTCAGCTTCAGACTTCAGCCCAGGTGC  
CAAGTGGTGAGGAAATAGGCAAGATAAAGAACGGCCACACAGGTCTGAGCAATGGAAATGGAATTCACCAC  
GGGCCAAACACGGATCCGAGATAATCGAAACTTTCAGCACCTGTTTCTCAAAAAATGCATAGAAAAAT  
TCAGTCCAGCTTGTCTGTAACAGCGATATCAGTAAGAAGAGCAAAGTAAATGCTGTCTTTTCCAAAAAGA  
CAGGCTTTTACCTGAAGATTGTTGTGTCCTGATCCTGGCTTGCTTGTCTGCGAATTCCTGACCCCTT  
TGCAACATTGCTCTGGGACAAGCGTCATGTGGCATCTGCACCTCAGAAGCCTGCTGCTGTTGCTGTGGTGA  
CGAGATGGGGGATGATTGTAACCTGCCCTTGTGATATGGACTGTGGCATCATGGATGCCTGTTGTGAATCAT  
CAGACTGCTTGAAATCTGTATGGAATGCTGTGGAATTTGTTTTCTTCAATAATATTTATCTTTTGTGTTG  
TGTTAAAACCTGGAGAGTGTAAAAATTTCTTTTGGGGGGAAGAAAAGCACATTGTAAGATTCTCATGAA  
ACAACATGGAATTTGCACTGTTAACTCATTATTGTAAGTAATCTCTGAAAGCCTTTTTACTTTAACCAAAT  
CTACATGGTTTTAATATGTGAAATTTAACTACTTTAACTAGTTTTATAAATTTCTTAATATGTTACAATAA  
CTTAGGGACATTTTACACCCCTTCCCAAATGTTAAATGCCTTCTCCTTTTTACCGATATTTCTGTTTC

TTTTAACCGTTCTCAGGAGCACTTTGCTCCAAATATATTATTTTTTCAGTGTGTATTTAAACGAGGCAGTTT  
ATTTTTGATATGTATCTATTTCATGATTGAAAGGAAGCAGTCTTGGCCAGGCACGGTGGCTTACACCTGTAAC  
CCTGGCATTGTTGGGAGGCCAAGGTGGGCAGATTGCCTGAGCTCAGGAGTTTCGAGACCAGCCAGGGCAACAT  
GGTGAACCCCATCTCTACTAAAATACAAAAAGTTAGCTGGGCTTGGCGGTGTGCGCCTGTAGTCCCAGCT  
ACTCAGGAGGCTGAGGCAGGAGAATTGCTTGAACCCGAGAGGCAGGAAAGTTGCAGTGAGCCGAGATTGTGCC  
ACTGAACCTCAACCTGCACTCCAGCCTGGGCAACAGAGCGAGACTCCATCTCTAAATAAATAAATAAATAA  
ATAAATAAATAAATAAATAAATAAATAAATAAATAAATAAATAAATAAATAAATAAATAAATAAATAAATAA  
TAATAGTTGGGAACAGTGTGATCTCTCTCCCTTACCTTCTCCACTTGTTC AACAGACTCTGAATGCCGA  
CTGTGTGGACTCTCTTCCCTCAGACTGTGGGGACAGATAACAATCCACTCCTGTCCACAGGAACATGAGATT  
TAGCAGACTAAGGAGATCTGTAAAGAATGAACCATAACCACAAGGCATACTGAAGTGAGGATTATAAGAGAA  
ATAAACTCAAAATGCTGTGGAAATATGCAGAGAATGCTACCAGAATATTCAGTAAGGTTTCAGGGAGAAT  
GTGGCATTGAGGACTCTCTTAGAATGAGTGATTACCTGCTATTTAAATGAATTTTAGATTTTTTGACA  
AAGATTTAGGTGGACACCCTAAACTGTGTGTGCCTTTAACAGTTAAAAGAACAGTGCCTTCAGCATACTT  
TTTTATTAGTTGTAGGAATACAGCTTTTTGAAAAAGCTATAAAGTTTTAAATTAACATAAATAATATGCATTTT  
CTTACACATAATTTAAATGTTATCATACTTTTTTGGATGAAAAATAATGCCTTAGTAAAATAGCTCTATTT  
AATAAAGAAGATTGAGTACTCTGACACATTTCAATTTAAATTAGGAAATTTTTAATATTAATAATCCAGTGT  
TCTGAGTTATTGAAAGGCTTTCTTTTATTTTGGAGCTTTAGGTCTTTTTGGGATGAGAACATTTTAGTTG  
TTTAGTTTGTCTTAAAGCAGTGCTATTTTTTGTAAACACAGATAAATGGAAACCATTCTTTTCAATGCAG  
AAGAAATCTAGATATCCCTACTGTGACCAAATTTCTGTATTACGATTTTATGTTAAATTAACATAATATG  
GCAGTTATAATGATCCTTAAGTGTAAAGAAATCAGTCAATTACAAGAGTAATTGTATAGTTATTGAGACC  
TATAGTGTGTGGCTTAGATGAAAGGGAGAGTAAATTTTATACCATGCTCTCTCCTACTCAGTTTGTATCTC  
TCTAAAATTGTAGTTTGGTTTGAATTAATAAATCTTAGTAGAAATTTTGAAGTATGCTTTGGGATTAA  
TAATTTTTTTAATTTTTCTGGCTGAATATCAAATTGATAGTAAACAACAGAAAGCATAATTTTAGGAAGGCT  
TTGCAAACCTAGCCTTTTTAAGAGAGGTTTTTAACTGAAGCATGAGAATATATCACCTGTGGTTTTTCT  
TTGAGATGAAACGTAGTTTCTAGTTATATCATTACTTAAAGGGCTTAAAAAGAAAAAACTTAGCAAACCTT  
TGAATCTTTCTTTTATTGCTATTTACACATACATACACACATACAAAACCTTTAAATTTTGGGATCTGAAT  
ATAATTCTGGTAAACAGCTGTCTTCATTTTTCTCCTCTAAAGAACTTAATTCATTTGTTACATAAAATATA  
AGGAAATCTTTATACTATTTTACAGTAACCACAATCTAAATATTTACATATAACCAAAATTAACCTTATGCT  
CATATATTAGGATGTGAGAATATCATCTGTTTTATGGACACATGAAACCTCCTAATGACCTGGAATTTGTTAG  
AATATTTGAGCTTTTTTATGCAAAAGTTTTTCAACCAAGTGGTTTTGTCTAATATTTAAACATGTACTGGCAC  
AATTTGTGATGAAAATATTAGCACATTTGCAATAATGTTTCTCCATAACAGAGAATGTTAATGGATACCAG  
AATTTTTATTTTTGTATTTATGTTTATAGTACTTTTTCTCCTTGTCTACTCCAGACAGTTATTCCATAAAGCA  
TTTTGTATAATTTAAAGGAAAACAGAAAAAGGAAAAGTAGGCAAATGTGAAAATAGTTTCAATATATCTTAT  
GATTTCTTAATGTAAATGTTTTGTTGAAGTATATGGCTATCATGACTAAGTGCTAGAATTTATAGTTACA  
GGCGGTGTCTTTTTAAATGTGGAAAGGCTTTTTAAATATTTTAAACTGGACCTGTATTATCCTGAATACA  
CTATTTTGAATTTTTTAAATGACTTCTTTATTTTGTCTTTACCGTATGTTTATATCTAATTGACATATT  
GACTAATGTTTGAAGAATTCAACCATAAGTTAAAATCTGAAGTTATCTTTATCATGTTTTCATCCCTGTC  
TGAAGATTTCTAGTCTTCTTATGTAAATCACATGACTCATGTCCGTAAATGAACTATGAAAGATATCGAT  
CAGTTTATGATCATTGACATGTGATTTCAAACACAGTGTCTTTTTAAATCTATAATATGTCAAATAC  
AAGTTTTTTTTTTTTACATCGTTTTAGTAAGTTAATTTCAATTTACTTTGGAGCTATATTTCCACTTA  
GAAAACTAAGGTAATTTTACAATATATGCTGAGATTAATAAACCAGGTAATAATGATCAAACATATATGA  
AATTGAGTCTTAGATTTAATGAATTTCACTCGAAAATAAATGATCAGAAGAATTTTCATCTAA

VRGVRAATAAAVAATAASGLSRREAGGRAGAAA VVRPPGRKCGRCRRLANFPGRKRRRRRRKGLGATTGG  
CGEAVSSLHPAPHSPSSVRPAGRRARRQRRGAGSAERPMSGAGEALAPGPVGPQRVAEAGGGQLGSTAQ GK  
CDKDNTEKDITQATNSHFTHGEMQDQSIWGNPDSGELIRTQPQRLPQLQTSQVPSGEEIGKIKNGHTGLS  
NGNGIHHGAKHGSADNRKLSAPVSVQKMRKIQSSLSVNSDISKKSKVNAVFSQKTGSSPEDCCVHCILACL  
FCEFLTLCNIVLGQASCGICTSEACCCCGDEMDDCNCPCMDMDCGIMDACCESSDCLEICMECCGICFPS

+++++

#9  
NM\_005583

Not well conserved beyond humans.

### LYL1 lymphoblastic leukemia derived sequence 1

Synonyms: bHLHa18; LYL1

CAGCCTGGCCCTTATCTGCACTGGGCCAGCATCCTCCGGCCGCTGCGCCGCCAGGGGTGAGAGGGAGGAAA  
CCGGGCCCGCCGGGGCGGGGAGAAGGCGGGCCGGCCCGGGAGCCGCTCACTTTCCCTGGGGGGGACCTACG  
CGGAGACCTCGGCTATCCTGGCCTTCCGAGGCCACGAGGAGGCGCGCCCAACGCCGGGCCTGGAGCAT  
TGAGGCCGGACCCTCGCGAGACAGCAGAGCCTGGCCTGACGCTGGAAACCACACCCTGGCCAGACTGCCA  
GCCCTGACGGGACAGAGCCAGGGCACTCACCAGGCTGCAAGAACAGTGCTGGGGTGAGTACCCCCACGTG  
GGGTCCATGTGCCCGCCTCAGGCACAGGCAGAGGTGGGCCCCACCATGACTGAGAAGGCAGAGATGGTGTG  
TGCCCCCAGCCCAGCGCCTGCCCCACCCCCTAAGCCTGCCTCGCCTGGGCCCCCGCAGGTGGAGGAGGTGG  
GCCACCGAGGAGGCTCCTCGCCCCCAGGCTGCCACCTGGTGTACCAGTGATCAGCCTGGGCCACAGCAGG  
CCCCCAGGGGTAGCCATGCCACCACAGAGCTGGGCACTCTGCGGCCCCCGCTGCTGCAACTCTCCACCCT  
GGGAACTGCCCCGCCCACTTTGGCCCTGCACTACCACCCTCACCCCTTCTCAACAGTGTCTACATTGGGC  
CAGCAGGACCTTTTAGCATCTTCCCTAGCAGCCGTTGAAGCGGAGACCAAGCCACTGTGAGCTGGACCTG  
GCTGAGGGGCACCAGCCCCAGAAGGTGGCCCGGCGCTGTTACCAACAGCCGGGAGCGCTGGCGGCAGCA  
GAACGTTAACGGCGCCTTCCGCGAGCTGAGGAAGCTGCTGCCGACGCACCCGCCCGACCCGGAAGCTGAGCA  
AGAACGAGGTGCTCCGCCTAGCCATGAAGTACATCGGCTTCCCTGGTGC GGCTGCTGCGCGACCAAGCCGCA  
GCTCTGGCCGCAGGCCCCACCCCTCCCAGGCTCGCAAACGGCCGGTGCACCCGGGTCCCAGACGACGGCGC  
CCGCCGGGGATCCGGACGCAGGGCCGAGGCGGCAGCGCGCTCGCAGCCCGCGCCCCCGGCCGACCCCGACG  
GCAGCCCCGGTGGAGCGGCCCGGCCCATCAAGATGGAGCAAACCGCTTTGAGCCCAGAGGTGCGGTGA  
CACGCGGCAGCACCTCTGAGCCGGAGGGCACCAGGGACTCGGCCCAGGGCCGTCAAGGAAAGGGCAGTGGA  
CGTGTCTCGCATGTTTCGGGAGCGAACTCCCCGAAGAAGGACCAGTGAAGACGTCAGGGCAAGGTCTCGG  
GGTCCGGAAGGGTGATCATCGACCCCCAAGGGACCCGAGACCCCTTAAAAAATCACCCACAACCCTCTG  
GAAGTGGCCTTGCCCGGTCCCCTTCCAGGGCGAGGTGGCAAAGCAACATGGCAGAGCAGTCATAGGAA  
AAAAAAAAAAAAAAAAAAAA

LAQTASPDGTEPGHSPGCKNSAGVSTPTS GSMCPPQAQAEVGPMTTEKAEMVCAPSPAPAPPPKPASPGPP  
QVEEVGHRGGSSPRLPPGVVIVISLGHSRPPGVAMPTTELGLTRPPLLQLSTLGTAPPTLALHYHPHPLN  
SVYIGPAGPFSIFPSSRLKRRP SHCELDLAEGHQPKVARRVFTNSRERWRQNVNGAFAELRKL LPTHP  
DRKLSKNEVRLAMKYIGFLVRLLRDQAAALAAGPTPPGPRKRPVHRVPDDGARRGSGRRAEAAARSQPAP  
PADPDGSPGGAARPIKMEQTALSPEVR

+++++

## #10

### NM\_004936

Apparently conserved in primates only.

#### CDKN2B cyclin-dependent kinase inhibitor 2B (p15, inhibits CDK4)

Synonyms: P15; MTS2; TP15; CDK4I; INK4B; p15INK4b; CDKN2B

GGCTCCCCACTCTGCCAGAGCGAGGCGGGGCAGTGAAGGACTCCGCGACGCGTCCGCACCCTGCGGCCAGAG  
CGGCTTTGAGCTCGGCTGCGTCCGCGCTAGGCGCTTTTTCCAGAAGCAATCCAGGCGCGCCCGTGGTTT  
TTGAGCGCCAGGAAAAGCCCGGAGCTAACGACCCGCGCTCGGCCACTGCACGGGGCCCCAAGCCGAGAA  
GGACGACGGGAGGGTAATGAAGCTGAGCCAGGTCTCCTAGGAAGGAGAGAGTGCGCCGGAGCAGCGTGGG  
AAAGAAGGGAAGAGTGTCTTAAGTTTACGGCCAACGGTGGATTATCCGGGCCGCTGCGCGTCTGGGGGCT  
CGGGAATGCGCGAGGAGAACAAGGGCATGCCAGTGGGGGCGGCAGCGATGAGGGTCTGGCCAGCGCCGCG  
GCGCGGGGACTAGTGGAGAAGGTGCGACAGCTCCTGGAAGCCGGCGCGGATCCCAACGGAGTCAACCGTTTT  
CGGGAGGCGCGGATCCAGGTCATGATGATGGGCAGCGCCCGCGTGGCGGAGCTGCTGCTGCCACGGCG  
CGGAGCCCAACTGCGCAGACCCTGCCACTCTCACCCGACCGGTGCATGATGCTGCCCGGGAGGGCTTCTG  
GACACGCTGGTGGTGTGTCACCGGGCCGGGGCGCGGCTGGACGTGCGCGATGCCTGGGGTCTGCTGCCCGT  
GGACTTGGCCGAGGAGCGGGGCCACCGCGACGTTGCAGGGTACCTGCGCACAGCCACGGGGGACTGACGCC  
AGGTTCCCCAGCCGCCACAACGACTTTATTTTCTTACCCAATTTCCACCCCCACCCACCTAATTCGATG  
AAGGCTGCCAACGGGGAGCGGGCGAAAGCCTGTAAGCCTGCAAGCCTGTCTGAGACTCACAGGAAGGAGGA

GCCGACCGGGAATAACCTTCCATACATTTTTTTCTTTGTCTTATCTGGCCCTCGACACTCACCATGAAGCG  
AAACACAGAGAAGCGGATTTCCAGGGATATTTAGGAGTGTGTGACATTCCAGGGGTCGTTTGTCTTTTCAGG  
GTTTTCTGAGGGAAAGTGCATATGAAATCCTTGACTGGACCTGGTGGCTACGAATCTTCCGATGGATGAAT  
CTCCCCTCCAGCGCTGAGTGGGAGAAGGCAGTGATTAGCACTTGGGTGACGGCAGTCGATGCGTTCACTC  
CAATGTCTGCTGAGGAGTTATGGTGAACCCACAACCTTAGGCCCTAGCGGCAGAAAGGAAAACCTGAAGACT  
GAGGACAAAGTGGAGGAGGGCCGAGGTGGGCTTCAGTAAGTCCCCGGCGGGCTTTAGTTTTGAGCGCATGG  
CAAGTCACATGCGTAAACGACACTCTCTGGAAGCCCTGGAGACCCTCGCCCAACTCCACCAGATAGCAGAG  
GGGTAAGAGAGGATGTGCAAGCGACGACAGATGCTAAAATCCCTGGATCACGACGCTGCAGAGCACCTTTG  
CACAGGATGCTGGCCTTTGCTCTTACTACACTGAGGAGAGATTCCCGCGGGTCCGCAGGCAGACTACACA  
GGATGAGGTGGTGGAGTGGAGTGAAGCAATTGTAACGGTTAACTGTAACGTTTTCTTTACACACACACA  
CACACACACACACACATGCTAGGATGCGGAAATCCCCTTATGACTTGTACTTTTTGATTTTTGTGATAT  
TTTTGTACTTTTTAGTTGTTTTCAGCAACTGTCTTATTTAATGGGGAGATTTTAAGTAACATAAAGTGGCTC  
TCAGTTAAAATGTGAGGAAGAACTACAGCTCTTAAATGTAGCAATGGCACTGTTGCAAACTCAGTGCAAAC  
GCCTAGATTGCTTTCTTTAACCTATTTATTTCTTTGTTAAATTTTTCTGATTGTTTCTTTATAGAGTG  
TCTCAGGGTGCAGAGGTGAGACTAAGAAATATTCCAAATGTCTTTTAGAAGATAGATGCACTTATGCAGTA  
AATTATCTTGGGATAGTTCCCAAAAGATTGCTGAAAAGTAGATTGAGTATAAAAACTTGAAAATATATGA  
TGGCTCGTGGGATGCTCTACTATCACTGAACAACTAAAGGTGCACTGCTTTGGGATTTAATTTCCAGGGT  
TGCTTGATCATTATATCATTGGAACAACCTGATACTTCACTACTTTAATAAAGAATTAACAGAGATTGAACT  
CCAAGAGGTGGGTAATTTGGTTTTAAAAATACATGTTTCATGGGTTTACCCTAACTCCTGAGAAATGTTAAA  
GGTTCACAGGGGTTCCCTTCTCTCAATGTTTGTAAATAATTGCTCATAAGCAATACCAGCAATTCATAAAAA  
CTGCTTACTTTATGCCATAGAAAATTAACACAAAGTGTATACATGTATTATGCTTCTAAATGCTCATTCTA  
CCAGATACACATTTAAAAGAGAAAAAAGGAACAGAAACAAGTCATTTGAGAGTGGAGACTTATAAGAAGGA  
GTACATTTGAGTTGAATACACAAATCTTTACTTCTCTACCAATTCCTATTCCCAAAATGAACATATTACTG  
GGGAAAGTTAGTTGAGAATCAGAGCATATGTTATTGGGGAAAGGATATGTTTATTGACACATAATCTGTAC  
CAGGTATGCATTAATAATATTTGTTAATTTAATTTAAACCTGAGAGATAGGTATTGTTTCCAGATGA  
GGACAATGAGGCAAAGAAATATCAAGTAACTTGCCAAAGGTTACAAGATATTCATTCCATGGATGCACAAA  
GAAGTGCATCTAGTTCCACAGCTGATTATGGTTGTCTTGCTTTTCTTCCATTGCACCAGCTTGTCTCTCA  
AAATCATGAATGATACACATGAAGATAACTTTTTTTAAAAAAGCAGAAATACACAATGATCTCCCTTGT  
AAGTCCTAAGTGGCTTTTTCTTCTCTAATCTTAGTAAATATAAACGGTTTTGTTTTGAAAACATTTTTAA  
AATGTCAACAATATGGAGAATAACCCCCCAACACACCTATAAAAAACCAATTTTTTGGAAACAAAGATAA  
TGGAACCTCCATTTTCAAACCTGAAGCACAGGGACAGAAAATATATTTCTAGTTATCACTTAAGCACTCAAT  
CATTAGAGGCTACAAGAATAATATTTTTTAAAGTTACAGTATTTTACAATTATTAGAAAACATTCTATATAA  
AAGAAGTCAGTTGATACTTTAAAATCTCCATTTGGTTTTATAAAATCCCTTAATTTGACCTCTATATCTTA  
AATTCCAAGATGTTTAAATTTGCTAGTTGCATTATACTGGGTGATGAAAATTATCCCTTGAAATAGATAT  
GAAACATGTTACTTTCATTTCTGGTTTTAAATAACTTGTGGAATCTTTCCTAATGACAACCTGATATTAAGGG  
AACTAAAGAAAATGTTATTGTGGATCCCACAGTACTATATTACACTGTTTTTTTTTTGTTTGTGTTTGTAGT  
TTTTTTTTATTTAAAGCAAACCTCAAACATTATTGGGTATCAATTACCACCTGGTTGTATTGAAATAGTAAC  
TTATCAATGCCATGTAATAAATTAATTCATTTTGAAGCCACCTGGCAGACAGGTTTAGCTGTTTCATCAG  
CAGCCTAATATATACTGTTAAATTTGTTAAGGATTTCACTTTGAAGGATACATGCAAAACATATAGTTACT  
ATTTTCATGAGTCCTGCTTCTAGCTCCATTGTGGAATACAGAAAATTAATATACCTGTTAAGTTCGTATC  
TAAACCTAAGACATTACCAAGGTTTGTACAAATTTACTACCTGACATTTATTCCAAGAAGATCTGGAAAG  
TTAAATAAATTTATAAATTTAATAACAAAAA

TVDYPGRCASGGCGMREENKGMPSGGGSDEGLASAAARGLVEKVRQLLEAGADPNGVNRFRRAIQVMMMG  
SARVAELLLLHGAEPNCADPATLTRPVHDAAREGFLDTLVVLHRAGARLDVRDAWGRLPVDLAEERGRD  
VAGYLRATATGD

+++++

#11

NM\_001085386

Apparently conserved in primates only.

NFE4 transcription factor NF-E4

Synonyms: NF-E4

GACAATTCTGTTTACGGAAGACTATAAAACCCTGCCCCCTACTCATTGGGTGCTGACGCCATTTTAGGCC  
TTAGCCTGCCTGCACCCAGGCGCTCATTAAAACAGCAGGTTGCTCCACACTGCCTCGTGTGTCTGTTGGC  
ACACTCTCAAGAGTTTGAACGGATACAAGAATCTTTCATCTGGTGCCGAAACCCGGGAGGGGCTCCGGTCT  
TCGTCCCCCGTGGACCTACCCCTCCGCCCCAGAAAGCAGGCCACAGCAGCCGGACAAAGGAAGCTCCTCAG  
CCTCCAGTTGCTTCTCTGTGCATGCACATCAGTCACTGATCTCACCTACTGGGGCCCTGCAGGCCATGGGG  
CCACAGCTCCACACAGAAGCCTCCTAGCAATCCACCTCCACCTGGTGCCTGCTTCAAGTGCGGCAATGAAG  
GCCACTGGCCACACAATGCCCAAACCCAGGTAAACCCACGAGGCCATGCCCCCTCTGCGGAGGACCCAC  
TGGAAGTTGGACTGTGAGCGGCCCTGCAAGGACCACCCCATCCCTTCTGAGCCAATCAAACCCCTCCTA  
CTCGGATCTCGTCAGCCTTGCCGCTGAAGACTGATAGTGCCTTGGAACAGACACCCAGCAACTACCATCG  
CTTCATCTGAGCCAAGGGTAAACCTGATGGTGGCAGGCCAGTCCCAAGGCGCAAGGCCACTTGTGCCAGC  
AGTGTGAGTCAGCAAGATAGCAGAAGCAGGAAGAGAGCCGGCCAGAAGACACCTACTCTGACTGGGAGACA  
CGTACCCCTGAAGATTGAGAAAGAGGCCATCCAGGTACCACATAGCAGTTACATCAGACTGGGACATTTCC  
TGTTTACAGGAGACTATAAAACCCTGCCCCCTACTCATTGGGTGCTGACGCCATTTTAGGCCTCAGCCTG  
CCTGCACCCAGGTACTCATTAAAACAGCGTGTGCTCCAAAA

LPRVVCWHTLKSLNGYKNLSSGAETREGLRSSSPVDLPLRPRKQATAAGQRKLLSLQLLLCACTSVTDLTY  
WGPAGHGATAPHRSLLAHLHLV PASSAAMKATGPHNAQTQVNPRGHAPSAEDPTGSWTVSGPKDHPHPF  
LSQSNPPTRISSALPLKTD SALEQTPQQLPSLHLSQG

+++++

## #12

### NM\_004364

Partial conservation of the non-AUG initiation in mammals but 7 of 17 mammalian orthologs examined have either broken frames or are missing the non-AUG codon including: *Monodelphis domestica*, *Macropus eugenii*, *Oryctolagus cuniculus*, *Loxodonta africana*, *Sus scrofa*, *Dasyus novemcinctus*, *Pteropus vampyrus*. As a result it did not pass our criteria for conserved non-AUG initiated candidates. Nevertheless, the non-AUG initiation is actually present in frogs and fish.

#### Cebpa CCAAT/enhancer binding protein (C/EBP), alpha

Synonyms: CEBP; C/EBP-alpha; CEBPA

CGGAGCTGCGCGGGCGCGGGCGAGCAGGGTCTCCGGGTGGGCGGGCGACGCCCGCGCAGGCTGGAGGC  
CGCCGAGGCTCGCCATGCCGGGAGAACTCTAACTCCCCATGGAGTTCGGCCGACTTCTACGAGGCGGAGCC  
GCGGCCCGGATGAGCAGCCACCTGCAGAGCCCCCGCACGCGCCAGCAGCGCCGCTTCCGGCTTTCCCC  
GGGGCGGGCCCCCGCGCAGCCTCCCGCCCCACCTGCCGCCCGGAGCCGCTGGGCGGCATCTGCGAGCAC  
GAGACGTCATCGACATCAGCGCCTACATCGACCCGGCCGCCTTCAACGACGAGTTTCTGGCCGACTGTT  
CCAGCACAGCCGGCAGCAGGAGAAGGCCAAGGCGGCCGTGGGCCCCACGGGCGGCGGGCGGGCGGCGACT  
TTGACTACCCGGGCGCGCCCGGGCCCCGGCGGCGCCGTCATGCCGGGGGAGCGCACGGGCCCCCGCCC  
GGCTACGGCTGCGCGGCCGCGGCTACCTGGACGGCAGGCTGGAGCCCCTGTACGAGCGCGTGGGGCGCC  
GGCGCTGCGGCCGCTGGTGATCAAGCAGGAGCCCCGCGAGGAGGATGAAGCCAAGCAGCTGGCGCTGGCCG  
GCCTCTTCCCTTACCAGCCGCGCCGCGCCGCGCCCTCGCACCCGCACCCGCACCCGCGCCCGCGCAC  
CTGGCCGCCCCGCACCTGCAGTTCAGATCGCGCACTGCGGCCAGACCACCTGCACCTGCAGCCCGGTCA  
CCCCACGCCGCGCCACGCCCGTGCAGCCCGCACCCCGCGCCCGGCTCGGTGCCGCGGCGCTGCCGG  
GCCCTGGCAGCGCGCTCAAGGGGCTGGGCGCCGCGCACCCCGACCTCCGCGGAGTGGCGGCAGCGGCGCG  
GGCAAGGCCAAGAAGTCCGTGGACAAGAACAGCAACGAGTACCGGGTGGCGCGGAGCGCAACAACATCGC  
GGTGCGAAGAGCCGCGACAAGGCCAAGCAGCGCAACGTGGAGACGCAGCAGAAGGTGCTGGAGCTGACCA  
GTGACAATGACCGCCTGCGCAAGCGGGTGAACAGCTGAGCCGCGAACTGGACACGCTGCGGGGCATCTTC  
CGCCAGCTGCCAGAGAGCTCCTTGGTCAAGGCCATGGGCAACTGCGCGTGAAGGCGCGGCTGTGGGACCG  
CCCTGGGCCAGCCTCCGGCGGGGACCCAGGGAGTGGTTTTGGGGTGGCCGATCTCGAGGCTTGGCCGAGCC  
GTGCGAGCCAGGACTAGGAGATTCCGGTGCCTCCTGAAAGCCTGGCCTGCTCCGCGTGTCCCCTCCCTTCC

TCTGCGCCGGACTTGGTGCCTAAGATGAGGGGGCCAGGCGGTGGCTTCTCCCTGCGAGGAGGGGAGAAT  
TCTTGGGGCTGAGCTGGGAGCCCGGCAACTCTAGTATTTAGGATAACCTTGTGCCTTGGAAATGCAAACCTC  
ACCGCTCCAATGCCTACTGAGTAGGGGGAGCAAATCGTGCCTTGTCAATTTATTTGGAGGTTTCTGCCTC  
CTTCCCGAGGCTACAGCAGACCCCATGAGAGAAGGAGGGGAGCAGGCCCGTGGCAGGAGGAGGGGCTCAGG  
GAGCTGAGATCCCGACAAGCCCGCCAGCCCCAGCCGCTCCTCCACGCCTGTCCTTAGAAAAGGGGTGGAAAC  
ATAGGGACTTGGGGCTTGGAACTAAGGTTGTTCCCTAGTTCTACATGAAGGTGGAGGGTCTCTAGTTCC  
ACGCCTCTCCACCTCCCTCCGCACACACCCCAACCCAGCCTGCTATAGGCTGGGCTTCCCTTGGGGCGG  
AACTCACTGCGATGGGGGTACCAGGTGACCAGTGGGAGCCCCACCCCGAGTCACACCAGAAAGCTAGGT  
CGTGGGTGAGCTCTGAGGATGTATACCCCTGGTGGGAGAGGGGAGACCTAGAGATCTGGCTGTGGGGCGGGC  
ATGGGGGGTGAAGGGCCACTGGGACCCTCAGCCTTGTGTACTGTATGCCTTTCAGCATTGCCTAGGAACA  
CGAAGCACGATCAGTCCATCCAGAGGGACCGGAGTTATGACAAGCTTTCCAAATATTTTGCCTTATCAGC  
CGATATCAACACTTGTATCTGGCCTCTGTGCCCCAGCAGTGCCTTGTGCAATGTGAATGTGCGCGTCTCTG  
CTAAACCACATTTTATTTGGTTTTTGTGTTTTGTTTTGGTTTTGCTCGGATACTTGCCAAAATGAGACTCTC  
CGTCGGCAGCTGGGGGAAGGGTCTGAGACTCCCTTTCTTTTTGGTTTTGGGATTACTTTTATCTGGGGG  
ACCAATGAGGTGAGGGGGGTTCTCCTTTGCCCTCAGCTTTCCCAAGCCCTCCGGCCTGGGCTGCCACAA  
GGCTTGTCCCCAGAGGCCCTGGCTCCTGGTCGGAAGGGAGGTGGCCTCCCGCCAACGCATCACTGGGGC  
TGGGAGCAGGAAGGACGGCTTGGTTCTTCTTTTTGGGGAGAACGTAGAGTCTCACTCTAGATGTTTTAT  
GTATTATATCTATAATATAAACATATCAAAGTCAA

VRGRGRAGSPGRRRRPAQAGRRGSPCRENSNSPMEADFYEAEP RPPMSSHLQSPPHAPSSAAF GFPRG  
AGPAQPPAPPAPEPLGGICEHETSIDI SAYIDPAAFNDEF LADLFQHSRQQEKAKAAVGPTGGGGGGDFD  
YPGAPAGPGGAVMPGGAHGPPPGYGCAAAGYLDGRLEPLYERVGAPALRPLVIKQEPREDEAKQLALAGL  
FPYQPPPPPPSHPHPHPPAHLAAPHLQFQIAHCGQTTMHLQPGHPTPPPTPVPSPHPAPALGAAGLPGP  
GSALKGLGAAHPDLRASGGSGAGKAKKSVDKNSNEYRVR RERNNI AVRKSRDKAKQRNVETQKQVLELTS  
NDRLRKRVEQLSRELDTLRGIFRQLPESSLVKAMGNCA
